1 ***TCF-7* is dispensable for anti-tumor response but required for**  
2 **persistent function of mature CD8 T cells**  
3

4 Rebecca Harris<sup>1\*</sup>, Mahinbanu Mammadli<sup>1\*</sup>, Shannon Hiner<sup>1</sup>, Liye Suo<sup>2</sup>, Qi Yang<sup>3</sup>, Jyoti Misra  
5 Sen<sup>4,5</sup>, Mobin Karimi<sup>1</sup><sup>✉</sup>

6 <sup>1</sup>Department of Microbiology and Immunology, SUNY Upstate Medical University, Syracuse,  
7 NY 13210.

8  
9 <sup>2</sup>Department of Pathology, SUNY Upstate Medical University, Syracuse, NY 13210.

10  
11 <sup>3</sup>Department of Pediatrics, Rutgers Robert Wood Johnson Medical School  
12 Rutgers Child Health Institute of New Jersey New Brunswick, NJ 08901

13  
14 <sup>4</sup>National Institute on Aging-National Institutes of Health, 08C218, Biomedical Research Center,  
15 251 Bayview Boulevard, Suite 100, Baltimore, MD 21224.

16  
17 <sup>5</sup>Immunology Program, Department of Medicine, Johns Hopkins School of Medicine, Baltimore,  
18 MD 21224.

19  
20  
21  
22 Rebecca Harris<sup>1\*</sup> and Mahinbanu Mammadli<sup>1\*</sup> equally contributed to this manuscript  
23  
24

25 To whom correspondence should be addressed ✉:

26 Mobin Karimi

27 Assistant Professor of Immunology and Microbiology

28 SUNY Upstate Medical University,

29 766 Irving Ave Weiskotten Hall Suite 2281,

30 Syracuse, NY 13210

31 Office Phone: 315-464-2344

32 Laboratory Phone: 315-464-7652

33 Email: [karimim@upstate.edu](mailto:karimim@upstate.edu)  
34

35 Conflict of interest statement: The authors have declared that no conflict of interest exists  
36  
37  
38  
39

40 **Abstract**

41 T Cell Factor-1, encoded by *TCF-7*, is a transcription factor that plays an essential role  
42 during T cell development and differentiation. In this manuscript we utilized a pre-clinical model  
43 provided evidence that *TCF-7* is dispensable for the anti-tumor response, and that *TCF-7*  
44 suppresses key transcriptional factors Eomes and T-bet and molecules responsible for peripheral  
45 CD8 T cell cytolytic function. We discovered that *TCF-7* regulates NKG2D expression on naïve  
46 and activated mouse CD8 T cells, and that peripheral CD8 T cells from *TCF-7* cKO utilize  
47 NKG2D to clear tumor cells.

48 We also provide evidence that *TCF-7* regulates key signaling molecules, including LCK,  
49 LAT, ITK, PLC- $\gamma$ 1, P65, ERK1/II, and JAK/STATs required for peripheral CD8 T cell persistent  
50 function. Our data transcriptomic and protein data uncovered the mechanism of how *TCF-7*  
51 impacting peripheral CD8 T cell inflammatory cytokine production, CD8 T cell activation, and  
52 apoptosis. Our pre-clinical model showed that CD8 T cells from *TCF-7* cKO mice did not cause  
53 GVHD, but effectively cleared primary tumor cells.

54  
55  
56  
57  
58  
59  
60  
61  
62  
63

## 64 **Introduction**

65 T Cell Factor-1 (*TCF-7*), a major T cell developmental transcription factor, is involved in the  
66 Wnt signaling pathway, and is critical for T cell development as well as activation (Escobar et  
67 al., 2020; Ma et al., 2012). Dysfunction of the Wnt/ $\beta$ -catenin/*TCF-7* signaling pathway leads to  
68 immune deficiency or autoimmunity (Shi et al., 2016). It is well known that *TCF-7* is involved in  
69 the regulation of cell proliferation and survival during later T cell development (Kim et al.,  
70 2020). In the absence of *TCF-7*, T cell development is completely blocked after early thymocyte  
71 progenitor (ETP) cells, which suggests that *TCF-7* is also important in T cell lineage  
72 specification (Germar et al., 2011; Weber et al., 2011). Several studies have shown that *TCF-7* is  
73 critical for controlling viral infection (He et al., 2016; Im et al., 2016; Utzschneider et al., 2016).  
74 Furthermore, *TCF-7*<sup>+</sup> CD8<sup>+</sup> T cell have self-renewal capacity, while CD8<sup>+</sup> T cells lacking  
75 *TCF-7* do not (Utzschneider *et al.*, 2016; Wu et al., 2016). Overwhelming evidence has  
76 suggested that *TCF-7* is critical for CD8 T cell persistence and capacity to control viral infection  
77 (Kurtulus et al., 2019; Miller et al., 2019; Siddiqui et al., 2019; Wu *et al.*, 2016). While  
78 investigating the role of *TCF-7* in viral infection, single cell RNA sequencing data uncovered  
79 that CD8 T cells expressing higher levels of *TCF-7* are quiescent and tissue resident, while CD8  
80 T cells expressing higher levels of *TCF-7* in periphery are highly proliferative, and that *TCF-7*  
81 negative T-bet<sup>hi</sup> CD8 T cells are transitory effector cells. *TCF-7*<sup>-</sup> Eomes<sup>hi</sup> CD8 T cells are not  
82 proliferative and express higher levels of immune checkpoint receptors, but maintain effector  
83 function (Beltra et al., 2020; LaFleur et al., 2019; Zander et al., 2019). Studies have also reported  
84 that *TCF-7*<sup>+</sup> CD8 T cells with stem-like abilities expresses low levels of PD-1 and Tim  
85 checkpoint receptors, further providing evidence that *TCF-7* is required for CD8 T cell formation  
86 and persistent function (Kurtulus *et al.*, 2019; Siddiqui *et al.*, 2019; Utzschneider *et al.*, 2016).  
87 Studies have demonstrated that dysfunctional virus-specific CD8 T cells transplanted into naïve

88 mice give rise to *TCF-7*-negative CD8 T cells (Utzschneider et al., 2013). However, tumor-  
89 specific CD8 T cells transferred to naïve mice might give rise to *TCF-7*<sup>+</sup> CD8 T cells,  
90 demonstrating the differential role of *TCF-7* in viral infection and tumor (Schietinger et al.,  
91 2016). These differences could be due to the differences between microenvironments in viral  
92 infection and in tumors (Philip et al., 2017). Whether *TCF-7*<sup>+</sup> cells will give rise to *TCF-7*<sup>+</sup> or  
93 *TCF-7*<sup>-</sup> cells will be dependent on internal and external signaling. Some studies have shown that  
94 both the long (p45) and the short (p33) *TCF-7* isoform are expressed by CD8 T cells that will  
95 give rise to stem-like CD8 T cells during viral infection, and it has been shown that the long  
96 isoform of *TCF-7* is capable of promoting stem-like CD8 T cell formation during viral infection  
97 by regulating genes like CD127, CXCR5 and cMyb (Chen et al., 2019). Currently, the role of  
98 long and short *TCF-7* isoforms is largely unknown.

99         Studies of T cells as immunotherapy in both human and mice showed that for a superior  
100 anti-tumor response, less differentiated cells are more favorable than a more differentiated subset  
101 of CD8 T cells (Gattinoni et al., 2011; Im *et al.*, 2016; Lugli et al., 2013). Ideal CD8 T cells for  
102 immunotherapy have been shown to exhibit stem-like abilities (such as those obtained by  
103 inducing *ex vivo* cell growth with IL-17, IL-15, IL-21) and higher expression of *TCF-7*, Eomes,  
104 and Bcl6 (Cieri et al., 2013; Cui et al., 2011). Thus, the suitability of *TCF-7* as a target for  
105 immunotherapy to clear viral infection and cancer might also indicate considerable consequences  
106 for autoimmune diseases.

107         To study the role of *TCF-7* in a clinically relevant model, we utilized allogeneic  
108 hematopoietic stem cell transplantation (allo-HSCT). In allo-HSCT, mature peripheral donor T  
109 cells found in the graft become alloactivated upon recognition of host HLA as non-self. These T  
110 cell activities help to clear residual malignant cells, which is called the graft-versus-leukemia

111 effect (GVL) (Balassa et al., 2019; Giralt and Bishop, 2009; Hall and Shenoy, 2019). On the  
112 other hand, alloactivated T cells also target healthy recipient tissues, an effect known as graft-  
113 versus-host disease (GVHD) (Mavers and Bertaina, 2018). We used a unique mouse strain which  
114 has deletion of *TCF-7* in mature T cells, rather than a global deletion (Xing et al., 2016). This  
115 *TCF-7* flox/flox x CD4cre mouse experiences deletion of *TCF-7* in all T cells at the double-  
116 positive phase of development, when all T cells express CD4 (Wang et al., 2019b). This allows  
117 us to overcome the severe T cell developmental defect that occurs in global *TCF-7* deletion, as  
118 *TCF-7* is critical for the double-negative stage of development (Yang et al., 2019).

119 Using a mouse model of GVHD and GVL following allo-HSCT, we were able to study all  
120 of the major T cell functions, as well as phenotype, clinical outcomes, and gene expression, in a  
121 single model. In this model, we transplanted CD8 T cells from either WT or *TCF-7* cKO mice  
122 into irradiated BALB/c mice (H2K<sup>b</sup>→H2K<sup>d</sup>) (Mammadli et al., 2021a; Mammadli et al., 2021c;  
123 Mammadli et al., 2021d). Using allogenic pre-clinical model, we have shown that CD8 T cells  
124 from *TCF-7* cKO effectively clear tumor cells without inducing GVHD by producing  
125 significantly less inflammatory cytokines as proinflammatory cytokines are considered the  
126 hallmark of allo-immunity (Ju et al., 2005; Seif et al., 2017). Our data also uncovered that CD8 T  
127 cells from *TCF-7* cKO mice cause significantly less tissue damage in GVHD target organs  
128 (Bleakley et al., 2012; Breems and Lowenberg, 2005). Molecular analysis showed that CD8 T  
129 cells from *TCF-7* cKO mice significantly showed reduction in key molecules required for CD8 T  
130 cell persistent function (Germar *et al.*, 2011; Giralt and Bishop, 2009; Gounari and Khazaie,  
131 2022). CD8 T cells from *TCF-7* cKO mice exhibited innate memory-like phenotype by  
132 upregulating CD122, CD44, and effector and central memory phenotypes in mature CD8 T cells  
133 critical for GVHD development (Dutt et al., 2011; Huang et al., 2013). We also uncovered that

134 CD8 T cells from *TCF-7* cKO mice significantly upregulated Eomes and T-bet, two downstream  
135 transcription factors which are known to be involved in GVL (Mammadli *et al.*, 2021a; Weeks *et*  
136 *al.*, 2021; Zhou *et al.*, 2010). Our data demonstrated that naïve CD8 T cells from *TCF-7* cKO  
137 mice upregulated NK cell type 2 receptor (NKG2D). NKG2D, encoded by *Klrkl*, is an activating  
138 cell surface receptor that is predominantly expressed on Natural killer cells (Larson *et al.*, 2006;  
139 Wensveen *et al.*, 2018). While naïve human CD8<sup>+</sup> T cells express NKG2D, in mice CD8 T cells  
140 only upregulate NKG2D upon activation (Hu *et al.*, 2016; Maasho *et al.*, 2005). Upregulation of  
141 Granzyme B on CD8 T cells from *TCF-7* cKO mice was also observed. The loss of *TCF-7* also  
142 led to upregulation of NK cell type 2 receptor (NKG2D). NKG2D, encoded by *Klrkl*, is an  
143 activating cell surface receptor that is predominantly expressed on Natural killer cells (Larson *et*  
144 *al.*, 2006; Wensveen *et al.*, 2018). NKG2D is abundantly present on all NK cells, NKT cells, and  
145 subsets of  $\gamma\delta$  T cells (Stojanovic *et al.*, 2018). While naïve human CD8<sup>+</sup> T cells express NKG2D,  
146 in mice CD8 T cells only upregulate NKG2D upon activation (Hu *et al.*, 2016; Maasho *et al.*,  
147 2005). Upregulation of Granzyme B on CD8 T cells from *TCF-7* cKO mice was also observed.  
148 Our molecular and animal data were confirmed by transcriptomic analysis.

149         Altogether, our data demonstrate that loss of *TCF-7* in mature murine CD8 T cells  
150 enhanced Eomes and T-bet expression and reduced TCR-signaling, resulting in less severe  
151 GVHD. Our data demonstrated that *TCF-7*-deficient CD8 T cells utilized NKG2D receptors to  
152 kill tumor targets. These findings will have a considerable impact on developing strategies to  
153 uncouple GVHD from GVL, and for developing therapeutic interventions for T cell-driven  
154 autoimmune disorders.

155

156 **Results**

157 **Loss of *TCF-7* in donor CD8 T cells reduced severity and persistence of GVHD symptoms,**  
158 **increased survival from lethal GVHD, and retained anti-tumor capabilities for the GVL**  
159 **effect.** Most of the previous research on *TCF-7* utilized a global *TCF-7* knockout because the  
160 primary focus was on *TCF-7*'s role as a developmental factor (Gounari and Khazaie, 2022;  
161 Weber *et al.*, 2011). However, we wanted to study the role of *TCF-7* in mature T cells. Global  
162 loss of *TCF-7* results in minimal T cell production from the thymus, because *TCF-7* is critical for  
163 DN stages of development (Johnson *et al.*, 2018). Therefore, we obtained mice with a T cell-  
164 specific knockout for *TCF-7* (*Tcf7* flox/flox x CD4cre, called *TCF-7* cKO here (Xing *et al.*,  
165 2016). This allowed us to study mature T cells that developed normally in the thymus, then lost  
166 expression of *TCF-7* at the DP phase (Berga-Bolanos *et al.*, 2015).

167 To determine whether *TCF-7* plays a role in mature alloactivated T cell regulation, which  
168 is currently unknown, we used a mouse model of MHC-mismatched allo-HSCT leading to  
169 GVHD and GVL. Briefly, BALB/c mice (MHC haplotype d) were lethally irradiated and  
170 transplanted with wild-type (WT) bone marrow and C57Bl/6-background (MHC haplotype b)  
171 donor CD8 T cells (Mammadli *et al.*, 2021c; Mammadli *et al.*, 2021d). The donor CD8 T cells  
172 came from wild-type (WT), or *TCF-7*-deficient (*TCF-7* cKO) mice. Recipients were given  
173  $1 \times 10^6$  CD8 T cells and  $10 \times 10^6$  WT T cell-depleted bone marrow cells, as well as  $2 \times 10^5$   
174 luciferase-expressing B-cell lymphoma (A-20) cells (Edinger *et al.*, 2003a; Edinger *et al.*, 2003b)  
175 to assess GVL responses (Mammadli *et al.*, 2021a; Mammadli *et al.*, 2021b; Mammadli *et al.*,  
176 2021c; Mammadli *et al.*, 2021d). A20 cells are syngeneic to BALB/c mice and allogeneic to  
177 C57BL/6 (B6) mice (Edinger *et al.*, 2003a; Edinger *et al.*, 2003b), meaning that the cells will not  
178 be naturally rejected by the BALB/c hosts, but will be attacked by the transplanted donor T cells.  
179 The MHC haplotype mismatch between host and donor cells drives alloactivation of donor T

180 cells, which in turn causes GVHD and GVL effects (Hoffmann et al., 2002). To examine disease  
181 severity, progression, and recipient mouse survival, recipient mice were weighed and given a  
182 clinical score three times per week following transplant, until about day 70 (**Fig. 1A-D**). The  
183 mice were scored based on six factors: skin integrity, fur texture, posture, activity level, weight  
184 loss, and diarrhea (Cooke et al., 1996). Since the A20 cells express luciferase (called A20 luc )  
185 (Mammadli *et al.*, 2021c), allowing us to track them by injecting D-luciferin into the recipient  
186 mice and imaging them with an *in vivo* bioluminescence scanner (IVIS 50), the mice were  
187 scanned one time per week with IVIS 50 until the end of the experiment (**Fig.1A, 1E**).

188 We found that mice who received WT donor CD8 T cells had a rapid increase in GVHD  
189 severity, with a high score being reached by day 14, suggesting severe GVHD (**Fig. 1B**). This  
190 high score was maintained, suggesting persistent disease, and reached a high peak score at day  
191 40 when the recipient mice died of disease burden (**Fig. 1B-D**). WT-transplanted mice lost  
192 weight initially and were unable to regain much weight (**Fig.1C**). In contrast, mice given *TCF-7*  
193 cKO CD8 T cells had much better survival, lower peak and average clinical scores, minimal  
194 disease burden, and a gain in weight following the initial weight loss period (**Fig.1B-D**). In  
195 addition, the clinical scores for *TCF-7* cKO CD8 T cells transplanted mice quickly reduced to  
196 near-control levels following peak score at day 10 (**Fig. 1B**), suggesting that disease does not  
197 persist in these mice. Therefore, loss of *TCF-7* in donor T cells led to reduced GVHD severity  
198 and persistence, with improved survival (**Fig.1D**).

199 Regarding anti-tumor effects, we observed that over time, the group receiving only bone  
200 marrow and tumor cells showed a large increase in tumor growth (**Fig. 1A, 1E**), because no T  
201 cells were present to control the tumor cells. In contrast, most mice given CD8 T cells from any  
202 donor type along with the BM and A20 luc cells were able to clear the tumor cells by the end of



203 the experiment (**Fig. 1A, 1E**). The GVL effect was maintained even in *TCF-7* cKO-transplanted  
204 mice (**Fig. 1A, 1E**). Altogether, these data show that *TCF-7* is dispensable for GVL effects, but  
205 critical for GVHD. Therefore, loss of *TCF-7* in donor T cells provides a clinically optimal  
206 phenotype, where GVHD severity is reduced but beneficial GVL effects are maintained.

207

208 **Loss of *TCF-7* drives changes to mature CD8 T cell phenotype which are primarily cell-**  
209 ***extrinsic***. It has been shown that loss of *TCF-7* in late stages of T cell development led to  
210 impaired output of CD4 T cells, and redirection of CD4 T cells to a CD8 T cell fate (Steinke et  
211 al., 2014). To determine whether loss of *TCF-7* affected mature donor T cell phenotype, we  
212 performed flow cytometry phenotyping on CD8 T cells (**Fig. 2**). First, we confirmed the loss of  
213 *TCF-7* expression in *TCF-7* cKO mice by flow cytometry (**Fig. 2A**). Next, we examined whether  
214 the loss of *TCF-7* also altered Eomesodermin (Eomes) and T-box transcription factor 21 (T-bet)  
215 expression, both of which are downstream of *TCF-7* (Chen *et al.*, 2019). Some reports have  
216 claimed that Eomes is activated by *TCF-7* (meaning loss of *TCF-7* reduces Eomes expression)  
217 (Paley and Wherry, 2010). However, in our model of conditional *TCF-7* deletion, we found that  
218 *TCF-7* cKO CD8 T cells had increased expression of Eomes compared to WT CD8 T cells (**Fig.**  
219 **2B**). Other reports have claimed that T-bet may be activated or not affected by *TCF-7* (Ma *et al.*,  
220 2012), but we found that loss of *TCF-7* led to increased T-bet expression in CD8 T cells (**Fig.**  
221 **2C**). This suggests that *TCF-7* normally suppresses the expression of Eomes and T-bet in mature  
222 CD8 T cells.

223 Some reports have suggested that CD44<sup>hi</sup> T cells do not cause GVHD or cause less severe  
224 GVHD (Dutt *et al.*, 2011). Therefore, we wanted to examine CD8 T cells from *TCF-7* cKO mice  
225 for activation markers like CD44 and CD122. Our data showed that CD8 T cells from *TCF-7*

226 cKO mice exhibit increased expression of CD122 and CD44 (**Fig. 2D-E**). Next, using CD62L  
227 and CD44 markers, we identified three major memory subsets: central memory (CD44<sup>hi</sup>  
228 CD62L<sup>hi</sup>), effector memory (CD44<sup>hi</sup> CD62L<sup>low</sup>), and naive (CD44<sup>low</sup> CD62L<sup>hi</sup>) cells (**Fig.2F**).  
229 *TCF-7* cKO mice showed increased central memory CD8 T cell subsets and decreased naive  
230 CD8 T cells (**Fig. 2F**). Thus, loss of *TCF-7* results in a more memory-skewed phenotype for  
231 CD8 T cells. Some reports have suggested that memory T cells delay induction of GVHD (Dutt  
232 *et al.*, 2011; Mammadli *et al.*, 2021c), so this phenotypic change may be beneficial (Nakajima *et*  
233 *al.*, 2021).

234 Changes to cell phenotype in a knock-out mouse may be cell-intrinsic (due directly to  
235 gene deficiency within the cell) or cell-extrinsic (due to changes in the microenvironment from  
236 gene deficiency) (Decman *et al.*, 2010; Mammadli *et al.*, 2021d). To determine whether the  
237 phenotypic effects we observed were cell-intrinsic or cell-extrinsic, we developed a chimeric  
238 mouse model. Briefly, we mixed bone marrow from WT and *TCF-7* cKO mice at a 1:4  
239 (WT:TCF) ratio for a total of 50X10<sup>6</sup> BM cells, then used this mixture to reconstitute lethally  
240 irradiated Thy1.1 mice. We used a 1:4 ratio based on our previous published work (Mammadli *et*  
241 *al.*, 2020; Mammadli *et al.*, 2021d), to ensure survival of the KO cells (based on our initial  
242 observations that *TCF-7* cKO T cells did not proliferate well in culture). At 9 weeks post-  
243 transplant, blood was taken to ensure reconstitution and survival of both donor types in each  
244 mouse. At 10 weeks, splenocytes were phenotyped by flow cytometry, with donor cells being  
245 identified by H2K<sup>b</sup>, CD45.1 (WT), and CD45.2 (*TCF-7* cKO) markers (Mammadli *et al.*, 2020).

246 First, we looked at the *TCF-7* expression in CD45.1+ (WT), and CD45.2+ (*TCF-7* cKO)  
247 cells and confirmed that cells from *TCF-7* cKO mice did not express *TCF-7* in chimeric mice  
248 (**Supp.Fig.1A**). We did see a statistically significant increase in T-bet expression in CD8 T cells

249 from *TCF-7* cKO donor cells compared to WT donor cells in chimeric mice, when we performed  
250 a t-test (data not shown). However, when we compared the T-bet expression in chimeric versus  
251 naïve CD8 T cells, we observed that T-bet expression in CD8 T cells from *TCF-7* cKO donor  
252 mice was reduced to near-WT levels from elevated levels (**Supp. Fig. 1B**). This suggests that the  
253 increased expression of T-bet seen in *TCF-7* cKO CD8 T cells from naïve mice is a cell-extrinsic  
254 effect. Interestingly, in the chimeric mice we observed that Eomes and CD122 expression levels  
255 in WT CD8 T cells were significantly increased to near-*TCF-7* cKO levels, suggesting that the  
256 increase in Eomes and CD122 expression in CD8 T cells from *TCF-7* cKO mice is primarily  
257 cell-intrinsic (**Supp.Fig.1C-D**).

258         Next, we examined the expression of CD44 and central memory phenotype in chimeric  
259 mice. We observed that while the frequencies of these subsets were lower in *TCF-7* cKO-derived  
260 CD8 T cells compared to WT-derived CD8 T cells in the chimera (opposite of the trend observed  
261 in naïve mice), this was because the frequencies of CD44 and CM phenotype in WT cells was  
262 enhanced to the levels expressed by *TCF-7* cKO cells from naïve mice (**Supp. Fig. 1E-F**).  
263 These results suggest that the effects of *TCF-7* deficiency on CD44 and CM phenotype  
264 expression in naïve mice could be primarily cell-intrinsic, with cell-extrinsic elements as well.  
265 Interestingly, effector memory phenotype in the chimeric mice we observed that levels in WT  
266 CD8 T cells were significantly increased to near-*TCF-7* cKO levels, suggesting that the increase  
267 in effector memory phenotype in CD8 T cells from *TCF-7* cKO mice is primarily cell-intrinsic  
268 (**Supp. Fig. 1G**). Finally, the naïve CD8 T cell population in the chimera coming from *TCF-7*  
269 cKO bone marrow was significantly increased compared to CD8 T cells from WT bone marrow  
270 and compared to naïve *TCF-7* cKO mice (**Supp. Fig. 1H**). This suggests that the effect on naïve  
271 CD8 T cells in *TCF-7* cKO mice could be either cell-intrinsic or cell-extrinsic. Altogether, these

272 data suggest that the phenotypic changes seen in *TCF-7* cKO may be primarily cell-intrinsic,  
273 with some additional cell-extrinsic effects being present.

274

275 **Loss of *TCF-7* alters cytotoxic mediator production in mature CD8 T cells.** Our data  
276 demonstrated that the loss of *TCF-7* increases Eomes and T-bet expression in mature CD8 T  
277 cells (**Fig. 2B-C**). Considering that Eomes and T-bet have been reported to play a central role in  
278 anti-tumor responses, we hypothesized that by upregulating Eomes and T-bet, CD8 T cells  
279 lacking *TCF-7* can maintain cytotoxicity, and that *TCF-7* is not required for CD8 T cell-  
280 mediated cytolytic function (Zhu et al., 2010). We anticipated that CD8 T cells from *TCF-7* cKO  
281 mice may have attenuated TCR signaling, so we examined this and other activating receptors by  
282 flow cytometry. It is also known that Eomes and T-bet overexpression increases NKG2D  
283 expression in NK cells (Kiekens et al., 2021). Considering that loss of *TCF-7* in mature T cells  
284 led to upregulation of Eomes and T-bet expression, we hypothesized that loss of *TCF-7* may also  
285 lead to upregulation of NKG2D expression in CD8 T cells and enhance the anti-tumor response.

286 Natural killer group 2 member D (NKG2D) is constitutively expressed on mouse NK  
287 cells, NKT cells and some other cells (Abel et al., 2018; Al Dulaimi et al., 2018), but does not  
288 get expressed on naïve mouse CD8 T cells (Prajapati et al., 2018). Human CD8 T cells always  
289 express NKG2D on their surface, but mouse CD8 T cells only express it upon activation  
290 (Wensveen *et al.*, 2018) NKG2D is activated by NKG2D ligands (Raulet et al., 2013), and  
291 NKG2D ligands are relatively restricted to malignant or transformed cells (Raulet, 2003; Raulet  
292 *et al.*, 2013). In order to determine whether loss of *TCF-7* affects NKG2D expression and anti-  
293 tumor responses, we analyzed NKG2D expression in CD8 T cells. We measured NKG2D  
294 expression by flow cytometry before and at different time points after CD3/CD28 activation

295 (Karimi et al., 2015). We found that CD8 T cells from *TCF-7* cKO mice had significantly  
296 increased expression of NKG2D on the cells surface compared to CD8 T cells from WT mice,  
297 before stimulation (**Fig.3A**). Next, we wanted to examine whether NKG2D expression was  
298 further upregulated on CD8 T cells from *TCF-7* cKO mice compared to CD8 T cells from WT  
299 mice after stimulation. CD8 T cells were cultured with 2.5ug/ml anti-CD3 and 2.5ug/ml anti-  
300 CD28 antibodies for 24, 48, or 72 hours. These cultured cells were examined for NKG2D  
301 expression by flow cytometry. We observed an increase in NKG2D expression on CD8 T cells  
302 from both WT and *TCF-7* cKO mice in a time-dependent manner, and at all time points,  
303 expression of NKG2D was higher for cells from *TCF-7* cKO mice (**Fig.3B**). There was no  
304 difference in the viability of the cells or CD8 T cell numbers before or after the culture  
305 (**Supp.Fig.2A-B**).

306 We also wanted to compare the Granzyme B expression in CD8<sup>+</sup>, NKG2D<sup>+</sup> T cells from  
307 *TCF-7* cKO and WT mice (Chu et al., 2013). We did not observe any Granzyme B expression in  
308 CD8 T cells before stimulation (**Fig.3C**). Only 24 hours after stimulation, we observed  
309 Granzyme B expression in T cells from both strains, peaking at 48 hours post-stimulation with  
310 no difference between strains of mice (**Fig.3C**). After 72 hours post-stimulation, CD8 T cells  
311 from WT mice had significantly reduced Granzyme B expression compared to *TCF-7* cKO CD8  
312 T cells (**Fig.3C**). We also confirmed total Granzyme B expression in CD8 T cells from *TCF-7*  
313 cKO mice, in the presence and absence of CD3/CD28 stimulation, using Western blotting. Total  
314 Granzyme B expression was upregulated in CD8 T cells from *TCF-7* cKO mice compared to WT  
315 mice (**Fig.3D-E**). These data demonstrated that CD8 T cells from *TCF-7* cKO mice may  
316 maintain anti-tumor responses by killing the target cells with an NKG2D-mediated mechanism,  
317 and by persistent upregulation of Granzyme B expression (Liu et al., 2022; Wang et al., 2022).

318           Next, we wanted to examine the functional consequences of upregulation of NKG2D  
319 expression on CD8 T cells from *TCF-7* cKO mice. We utilized an *in vitro* cytotoxicity assay,  
320 where we used anti-NKG2D neutralizing antibody. We isolated CD8 T cells from WT and *TCF-*  
321 *7* cKO mice and cultured them for 48 hours with anti-CD3/anti-CD28 antibodies in order to  
322 induce optimal NKG2D expression in CD8 T cells. CD8 T cells from *TCF-7* cKO and WT mice  
323 were then cultured with tumor target A20 cells (Edinger *et al.*, 2003b) in a 40:1 ratio of tumor  
324 cells to CD8 T cells, along with anti-NKG2D antibody or isotype control antibody for 4 hours.  
325 We used the A20 cell line as a tumor target because it is known for expressing NKG2D ligands  
326 including Rae1, H60, and MULT1(Karimi *et al.*, 2015; Nishimura *et al.*, 2008). Triplicate wells  
327 were averaged and percent lysis was calculated from the data using the following equation: %  
328 specific lysis =  $100 \times (\text{spontaneous death bioluminescence} - \text{test bioluminescence}) / (\text{spontaneous}$   
329  $\text{death bioluminescence} - \text{maximal killing bioluminescence})$  (Karimi *et al.*, 2014).

330           Our data showed that the addition of anti-NKG2D antibody significantly reduced the  
331 cytotoxicity of CD8 T cells from *TCF-7* cKO mice, whereas addition of isotype control had no  
332 effect on cytotoxicity of the CD8 T cells from *TCF-7* cKO mice (**Fig.3F**). In contrast, the  
333 addition of anti-NKG2D antibody (Karimi *et al.*, 2015) did not change cytotoxicity of the CD8 T  
334 cells from WT mice (**Fig.3F**). These data further support the idea that *TCF-7* cKO CD8 T cells  
335 maintain their anti-tumor activity through an NKG2D-mediated mechanism. Taking into account  
336 that normal tissue does not express NKG2D ligands on the surface and that primarily malignant  
337 and transformed cells upregulate these ligands, this could explain why CD8 T cells from *TCF-7*  
338 cKO mice cause less GVHD but maintain their anti-tumor activity (Nishimura *et al.*, 2008).  
339

340 **Loss of *TCF-7* alters cytokine production, chemokine expression, and expression of**  
341 **exhaustion markers by mature CD8 T cells.** We confirmed that CD8 T cells from *TCF-7* cKO  
342 mice mediate cytolytic function primarily through NKG2D. Next, we wanted to examine the  
343 mechanism behind why CD8 T cells from *TCF-7* cKO mice induce less GVHD. One of the  
344 hallmarks of GVHD is the release of pro-inflammatory cytokines by alloactivated donor T cells,  
345 eventually leading to cytokine storm (Lynch Kelly et al., 2015; Mohty et al., 2005). We  
346 examined whether loss of *TCF-7* in donor CD8 T cells led to changes in cytokine production,  
347 thereby affecting GVHD damage. We allotransplanted lethally irradiated BALB/c mice as  
348 described above. Recipient mice were transplanted with  $1.5 \times 10^6$  WT or *TCF-7* cKO CD8 donor  
349 T cells. Recipients were sacrificed at day 7 post-transplant. Splenocytes were isolated and  
350 restimulated by 6 hours of culture with PBS (control) or anti-CD3/anti-CD28 (stimulation),  
351 along with Golgiplug. Afterwards, the cultured cells were stained with antibodies against H2K<sup>b</sup>,  
352 CD3, CD4, CD8, TNF- $\alpha$ , and IFN- $\gamma$ . Our data showed that production of TNF- $\alpha$  by donor CD8  
353 T cells trended toward decreasing when *TCF-7* was lost (**Supp. Fig. 3A**). In contrast, IFN- $\gamma$   
354 trended toward increasing upon loss of *TCF-7* in CD8 T cells (**Supp. Fig. 3B**).

355 We also obtained serum from cardiac blood of recipient mice at day 7 post-transplant and  
356 tested it with a mouse Th cytokine ELISA panel (LEGENDplex kit from Biolegend) (Mammadli  
357 et al., 2020; Mammadli et al., 2021d). Levels of TNF- $\alpha$  and IFN- $\gamma$  in serum of recipient mice  
358 given *TCF-7* cKO CD8 T cells were lower than in mice given WT CD8 T cells at day 7 (**Fig.**  
359 **4A**). In contrast, the serum levels of IL-2 in mice given *TCF-7* cKO CD8 T cells was higher than  
360 in mice given WT CD8 T cells at day 7 (**Fig. 4A**). At day 14 post-transplant, the reduction in  
361 TNF- $\alpha$  and IFN- $\gamma$  levels observed at day 7 for *TCF-7* cKO-transplanted mice was preserved (**Fig.**  
362 **4B**). We observed a trend towards decreased serum levels of IL-2 in mice given *TCF-7* cKO

363 CD8 T cells compared with mice given WT CD8 T cells at day 14 post-transplant, opposite of  
364 the effect observed on day 7 post-transplant (**Fig.4B**). This suggests that *TCF-7* cKO CD8 T  
365 cells may be capable of IFN- $\gamma$  and TNF- $\alpha$  production at the same level as WT CD8 T cells when  
366 restimulated, but in reality, produce less IFN- $\gamma$  and TNF- $\alpha$  than WT cells when allotransplanted.

367 In order for GVHD to persist, donor T cells must proliferate in secondary lymphoid  
368 organs and target organs (Beilhack et al., 2005; Ferrara, 2014). Naive and effector T cells drive  
369 GVHD, but they are short-lived and must be replaced to maintain an alloresponse (Jiang et al.,  
370 2021; Jiang et al., 2014). Also, given that memory cells are increased among CD8 T cells when  
371 *TCF-7* is lost, we hypothesized that activation and/or exhaustion of these cells may also be  
372 affected. Ki-67 (Blessin et al., 2021) is a marker of T cell activation and proliferation, and TOX  
373 (Khan et al., 2019) and PD-1 are markers of exhaustion (Ahn et al., 2018). Therefore, we wanted  
374 to determine the Ki-67, TOX, and PD-1 expression levels on WT and *TCF-7* cKO CD8 T cells *in*  
375 *vitro*. We cultured splenocytes from either WT mice or *TCF-7* cKO mice *in vitro* with anti-CD3  
376 and anti-CD28 antibodies for 24, 48, and 72 hours. We did not observe any difference in Ki-67  
377 expression in cells that were not stimulated, but the CD8 T cells from *TCF-7* cKO mice that were  
378 stimulated for 72 hours *in vitro* showed significant upregulation of Ki-67 expression (**Fig. 4 C-**  
379 **D**), suggesting that CD8 T cells from *TCF-7* cKO mice could potentially proliferate more than  
380 CD8 T cells from WT mice when restimulated. We also observed the same trend of increased  
381 expression for PD-1 at 72 hours post-stimulation (**Fig.4E-F**). There were no differences in  
382 expression of TOX at any time points *in vitro* when CD8 T cells from *TCF-7* cKO mice were  
383 compared to WT (**Supp.Fig.3C**).

384 Next, we checked the expression of these markers *in vivo* from donor cells that were allo-  
385 transplanted in recipient Balb/c mice as described earlier. At day 7 post-transplant, splenocytes



386 were isolated and Ki-67, TOX, and PD-1 expression were detected by flow cytometry. We  
387 observed that donor CD8<sup>+</sup>T cells from *TCF-7* cKO mice expressed more TOX compared to WT,  
388 suggesting that donor T cells *TCF-7* cKO mice were more exhausted following  
389 allotransplantation (**Fig.5G-H**). We did not observe any statistically significant differences in Ki-  
390 67 or PD-1 expression at day 7 post-transplant (**Supp.Fig.3D-E**). Taken together these data  
391 suggest that CD8 T cells from *TCF-7* cKO mice could be more exhausted than WT CD8 T cells  
392 both *in vivo* and *in vitro*.

393                 One of the major functions of alloactivated T cells is migration from spleen to  
394 GVHD target organs, including liver and small intestine(Beilhack *et al.*, 2005; Ferrara, 2014).  
395 Expression of chemokines and chemokine receptors is a critical aspect of T cell migration to  
396 target organs. To determine whether expression of these molecules was affected by loss of *TCF-*  
397 *7* in CD8 T cells, we FACS sorted pre- and post-transplanted donor CD8 T cells from WT or  
398 *TCF-7* cKO mice (spleen only for pre-transplant, spleen, or liver for post-transplant). We then  
399 extracted RNA from the cells, converted it to cDNA, and performed qPCR using a 96-well  
400 mouse chemokine/chemokine receptor plate (Thermo Fisher). As expected, expression of these  
401 markers was generally upregulated in alloactivated cells. Expression of these markers was  
402 generally higher in *TCF-7* cKO CD8 T cells from pre-transplant spleen compared to WT pre-  
403 transplant spleen (**Supp. Fig. 4A**), but these markers were generally downregulated in *TCF-7*  
404 cKO CD8 T cells from post-transplant liver and spleen compared to WT cells (**Supp. Fig. 4B-**  
405 **C**). Therefore, *TCF-7* controls expression of CD8 T cell chemokine/chemokine receptors.

406

407 **Loss of *TCF-7* in donor CD8 T cells led to decreased damage to the GVHD target organs.**

408 During GVHD, host tissues are damaged by the activity of alloactivated T cells. To determine

409 whether damage to target organs of GVHD (skin, liver, and small intestine) was altered by loss  
410 of *TCF-7* in donor T cells, we collected organs from mice allotransplanted as described above  
411 (Beilhack *et al.*, 2005; Mammadli *et al.*, 2021a; Mammadli *et al.*, 2021d; Weeks *et al.*, 2021). At  
412 day 7 and day 21 post-transplant, we collected pieces of skin, small intestine, and liver from  
413 recipient BALB/c mice. These organs were fixed, sectioned, stained with hematoxylin and eosin  
414 (H&E), and analyzed by a pathologist (L.S.) (**Fig. 5**). At day 7, *TCF-7* cKO mice showed  
415 significantly less inflammatory infiltrates in all the organs. We observed much less inflammatory  
416 infiltrates in the bile duct epithelium of the portal triad (black arrows showing the interlobular  
417 bile ducts) in the liver of the *TCF-7* cKO-transplanted recipients compared with WT-transplanted  
418 recipients (**Fig. 5A**). In the small intestines, no apoptotic bodies were seen in the crypts of the  
419 small intestine in the *TCF-7* cKO CD8 T cell-transplanted mice, while frequent apoptotic bodies  
420 were present in the WT CD8 T cell-transplanted mice at day 7 post-transplantation (black  
421 arrows) (**Fig. 5B**). In the skin, a mild increase in inflammatory cells was observed in the dermis  
422 of the WT CD8 T transplanted mice, while the dermis of the *TCF-7* cKO CD8 T transplanted  
423 mice appears normal at day 7 post-transplantation (**Fig. 5C**).

424         Again, at day 21 post-transplant, *TCF-7* cKO CD8 T cell transplanted mice showed  
425 significant less inflammatory infiltrates in all the sectioned GVHD target organs. We observed  
426 much less inflammatory infiltrates involving the bile duct epithelium of the portal triad (black  
427 arrows showing the interlobular bile ducts) in the liver of the *TCF-7* cKO CD8 T cell-  
428 transplanted mice compared with WT CD8 T cell-transplanted mice (**Fig. 5D**). At day 21 post-  
429 transplant, no apoptotic bodies were seen in the crypts of the small intestines of the *TCF-7* cKO  
430 CD8 T cell transplanted mice, while few apoptotic bodies are present in the small intestines of  
431 the WT CD8 T cell transplanted mice (black arrows) (**Fig. 5E**). A marked increase in

432 inflammatory cells (red circle) and destruction of the adnexal glands was observed in the dermis  
433 of the WT CD8 T cell-transplanted recipients, while the dermis of the *TCF-7* cKO CD8 T cell  
434 transplanted recipients showed only a mild increase in dermal inflammatory cells, with  
435 preservation of adnexal glands (**Fig. 5F**). Altogether, these data suggest that *TCF-7* normally  
436 promotes GVHD damage to healthy tissues and is indispensable for T cell-driven damage. Thus,  
437 loss of *TCF-7* in donor T cells leads to reduced severity and persistence of GVHD over time.

438

439 ***TCF-7* alters the transcriptomic signature of alloactivated T cells.** Given that the phenotype  
440 and functions of donor T cells, as well as disease outcomes, were significantly altered by loss of  
441 *TCF-7* on donor cells, we sought to determine what specific gene changes occurred to support  
442 this. We allotransplanted recipient BALB/c mice with  $1 \times 10^6$  donor CD3 T cells as above, and  
443 FACS-sorted pre- and post-transplant WT or *TCF-7* cKO donor CD8 T cells, which were stored  
444 in Trizol and transcriptionally profiled. When we analyzed the genetic profile of the pre-  
445 transplanted CD8 T cells from *TCF-7* cKO and WT mice, we were not able to determine any  
446 differentially expressed genes (DEGs, FDR<0.1). However, when we performed Gene Set  
447 Enrichment analysis (GSEA) using the Hallmark pathways collection from Molecular Signatures  
448 Database (MSigDB), we identified that cytokine signaling pathways like TNF- $\alpha$  Signaling via  
449 NF- $\kappa$ B and Interferon gamma response were enriched in pre-transplanted CD8 T cells from WT  
450 mice compared with cells from *TCF-7* cKO mice (**Supp.Fig.5A-C**). Meanwhile, a number of  
451 pathways involved in cell cycle also were enriched in WT cells versus *TCF-7* cKO pre-  
452 transplanted CD8 T cells, like the P53 pathway, G2M checkpoint, DNA repair, and Myc targets  
453 pathways (**Supp.Fig.5A**). MTOR signaling, Allograft rejection, and Oxidative phosphorylation  
454 pathways were also enriched in pre-transplant CD8 T cells from WT mice (**Supp.Fig.5A,6D-F**),

455 suggesting that loss of *TCF-7* alters the transcriptional profile of CD8 T cell towards decreased  
456 cytokine release while also altering the cell cycle, leading to a lessening of the alloactivation  
457 responses.

458         When we analyzed the post-transplanted CD8 T cells which were alloactivated *in vivo*, we  
459 identified 2548 differentially expressed genes (DEGs; FDR<0.1) when comparing *TCF-7* cKO  
460 cells to WT cells (**Fig. 6A-B**). A majority of the DEGs (2000 genes) were downregulated  
461 (module 2 in heatmap) and only 548 genes (module 1 in heatmap) were upregulated in post-  
462 transplant CD8 T cells from *TCF-7* cKO mice compared to WT mice (**Fig. 6A-B**). We analyzed  
463 both up- and downregulated DEGs for the Gene Ontology (GO) enrichment analysis using  
464 Functional Annotation Chart tools, selecting only the top 20 GO BP (Biological Process) terms  
465 in the Database for Visualization and Integrative Discovery (DAVID)(Huang da et al., 2009;  
466 Sherman et al., 2022). The analysis showed that the differentially expressed genes in post-  
467 transplant CD8 T cells from *TCF-7* cKO mice compared to WT were involved in Cell Cycle,  
468 Cell-cell adhesion, Cell division, Apoptotic process, Antigen processing and presentation via  
469 MHC class I, TCR signaling, Regulation of NF- $\kappa$ B signaling, Metabolic process, and others  
470 (**Supp.Fig.6**). Once we knew which processes these DEGs played a role in, we pulled out the top  
471 genes that were altered for each GO BP term that we were interested in. When we looked at the  
472 top 35 DEGs based on P-value that were altered in Cell cycle, we observed that a majority of  
473 them were downregulated in *TCF-7* cKO compared to WT (**Fig.6C**). We also looked at the top  
474 30 genes based on P-value that were altered in Apoptotic processes (**Fig.6D**), which also showed  
475 that most of the genes were downregulated in CD8 T cells in *TCF-7* cKO mice. When we looked  
476 at the top 30 genes that play a role in metabolic processes, we observed that only 1 gene was  
477 upregulated, and the rest were downregulated in *in vivo* alloactivated CD8 T cells from *TCF-7*

478 cKO mice (**Fig. 6E**). While the upregulated genes in the NF- $\kappa$ B pathway were Fasl, Ubd, Chuk  
479 and others, the downregulated genes were Rela, Irf3, Traf2, Mavs, Tradd, Nod1, Tnfrsf1a, and  
480 Trim25 (**Fig.6F**).

481 Gene Set Enrichment analysis (GSEA) using the Hallmark pathways identified that  
482 signaling pathways like PI3K-AKT-MTOR Signaling and TNFA Signaling via NF- $\kappa$  $\beta$  were  
483 enriched in post-transplanted CD8 T cell from WT mice compared to cells from TCF-7 cKO  
484 mice (**Supp.Fig.7A-B**). GSEA analysis using the C2 canonical pathways showed that a number  
485 of cytokines signaling pathways involving IL-1, IL-2, IL-4, and IL-7 were enriched in post-  
486 transplanted CD8 T cells from WT mice compared to cells from *TCF-7* cKO mice (**Fig.6G**).  
487 While Cell cycle pathways were enriched in CD8 T cells from *TCF-7* cKO mice compared to  
488 cells from WT mice, Apoptosis and Cell adhesion pathways were enriched in post-transplanted  
489 CD8 T cells from WT mice (**Fig.6H**). Meanwhile, a number of cells signaling pathways were  
490 also enriched in WT CD8 T cells compared to *TCF-7* cKO cells, such as TCR signaling, Toll  
491 like receptor signaling, Jak-Stat signaling, ERK-MAPK signaling, and NF- $\kappa$ B pathways (**Fig.6I**).

492 We also analyzed the genes that were altered in KEGG pathways, which revealed that  
493 DEGs that were altered in *in vivo* alloactivated CD8 T cells from *TCF-7* cKO mice (compared to  
494 WT) were involved in pathways like Cell cycle, DNA replication, Metabolic pathways, Natural  
495 killer mediated cytotoxicity, TCR signaling, JAK-STAT signaling, Chemokine receptor  
496 signaling, and others (**Fig.7A**). Specifically, *Klrl1* gene for NKG2D on Natural killer mediated  
497 cytotoxicity pathway were enriched in allo-activated *TCF-7* deficient CD8<sup>+</sup> T cells compared to  
498 WT CD8<sup>+</sup> T cells. Clustering of genes that were affected in TCR signaling showed that while  
499 AKT1, AKT2, Pik3r5, Zap70, LCK, Lat, PLC $\gamma$ 1, Pdc1, Vav1, Rela, Mapk3, Nfkb1a, and Nfatc1  
500 were downregulated, *Ifng* and *Ptprc* were upregulated in post-transplanted CD8 T cells from

501 *TCF-7* cKO mice (**Fig.7B**). The JAK/STAT signaling pathway is important for cytokine  
502 production and for the response of T cells to cytokines. Analysis revealed that IL2RB, JAK3,  
503 STAT5B, STAT3, STAT1, Cish, Il2rb, Socs3, and Socs1 genes were downregulated in the JAK-  
504 STAT pathway for *TCF-7* cKO CD8 T cells compared to WT (**Fig.7C**).

505 In order to confirm these changes in genes, we isolated CD8 T cells from WT and *TCF-7*  
506 *cKO* mice and determined the baseline level protein expression of LCK, ZAP70, LAT, ITK,  
507 PLC $\gamma$ 1, ERK1-2, Jak2, Jak3, Stat3, p65-rela, AKT, and actin in unstimulated and 10 minute-anti-  
508 CD3/CD28-stimulated samples. Data from non-stimulated samples revealed that protein  
509 expression of most of the markers was downregulated in CD8 T cells from *TCF-7* cKO mice  
510 compared to WT mice; only ZAP70, JAK3 and AKT were not affected by loss of *TCF-7*  
511 (**Fig.7D, Supp.Fig.8A**). We observed even more robust differences in samples that were  
512 stimulated with anti-CD3/CD28 for 10 minutes, and again only ZAP70 and AKT were  
513 unaffected by loss of *TCF-7* (**Fig.7E, Supp.Fig.8B**). Altogether, the data from RNA sequencing  
514 analysis and Western blots of stimulated and unstimulated samples showed attenuation of TCR  
515 signaling and many other pathways in CD8 T cells from *TCF-7* cKO mice. These results help to  
516 explain why CD8 T cells from *TCF-7* cKO mice cannot induce GVHD as severely as CD8 T  
517 cells from WT mice.

518  
519  
520  
521

522 **Discussion**

523 T Cell Factor-1 (*TCF-7*) is a critical regulatory transcription factor in T cell development and  
524 functions (Zuniga-Pflucker, 2004). *TCF-7* is known to be important for T cell development, as  
525 well as activation in some contexts (Yu et al., 2010). *TCF-7* has been extensively studied in viral  
526 infection(Escobar *et al.*, 2020; He *et al.*, 2016; Im *et al.*, 2016; Kurtulus *et al.*, 2019; Miller *et al.*,  
527 2019; Siddiqui *et al.*, 2019; Utzschneider *et al.*, 2016; Weber *et al.*, 2011; Wu *et al.*, 2016).  
528 However, the role of (*TCF-7*) in a mouse model of allogeneic transplant has not been  
529 investigated. Using a murine allogeneic transplant model, we have shown that CD8 T cells from  
530 *TCF-7* cKO effectively clear tumor cells without inducing GVHD by producing significantly less  
531 inflammatory cytokines (Ju *et al.*, 2005; Seif *et al.*, 2017). Our data also uncovered that CD8 T  
532 cells from *TCF-7* cKO mice cause significantly less tissue damage in GVHD target organs  
533 (Bleakley *et al.*, 2012; Breems and Lowenberg, 2005). Here, we show that loss of *TCF-7* alters a  
534 number of CD8 T cell functions, and while it is dispensable for anti-tumor responses, it is  
535 essential for host tissue damage, cytokine production and signaling, and gene expression, playing  
536 a role in a number of immunological and biological pathways during alloactivation. (Yu *et al.*,  
537 2010). This murine model allows us to study T cell function, clinical outcomes, and gene  
538 expression all in one model. Here, we showed that *TCF-7*-deficiency alters the phenotype of  
539 CD8 T cells by upregulating CD44 and CD122. We and other have shown that innate memory-  
540 like CD8 T cells expressing CD12<sup>hi</sup> and CD44<sup>hi</sup>, Eomes and T-bet ameliorate GVHD  
541 development (Huang et al., 2019; Karimi *et al.*, 2014; Mammadli *et al.*, 2020; Mammadli *et al.*,  
542 2021d; Zheng et al., 2009). The role of central (CD44<sup>hi</sup>, CD62L<sup>hi</sup>) and effector (CD44<sup>hi</sup>,  
543 CD62L<sup>low</sup>) memory phenotypes has been investigated previously (Huang *et al.*, 2019; Zheng *et*  
544 *al.*, 2009). Our data demonstrated that *TCF-7* significantly impacts CD8 T cell central memory  
545 phenotypes, suggesting that *TCF-7* might be a regulator for T cell activation. While effector and

546 naive cells are known to cause severe GVHD, central memory cells are often associated with less  
547 severe disease (Dutt *et al.*, 2011; Tugues *et al.*, 2018; Zheng *et al.*, 2009). Our findings  
548 suggesting that this phenotypic change in *TCF-7 cKO* cells may be beneficial for reducing  
549 disease severity. Our experiments in mixed bone marrow chimeras showed that bone marrow-  
550 derived CD8 T cells from WT and or *TCF-7 cKO* mice developed in the same thymus have a  
551 similar phenotype to each other, and a different phenotype than CD8 T cells from naïve WT or  
552 *TCF-7 cKO* mice. We found that the upregulation of activation marker expression like Eomes,  
553 CD122, and the effector memory phenotype is primarily cell-intrinsic, with changes to other  
554 markers being either cell-extrinsic or primarily cell-intrinsic with other extrinsic effects.

555 Donor T cells are crucial for target organ injury in graft-versus-host disease (GVHD).  
556 These alloactivated T cells proliferate, migrate to target organs (liver, skin, and small intestine),  
557 and produce cytokines during GVHD (Bastien *et al.*, 2012; Reddy and Ferrara, 2008; Villarroel *et*  
558 *al.*, 2014). Our data showed that tissue damage in liver, skin, and small intestine (all target  
559 organs) was reduced by loss of *TCF-7* in donor CD8 T cells at all timepoints. This shows that  
560 *TCF-7* in donor T cells is required for GVHD damage and persistence over time.

561 Donor T cells eliminate tumor cells (GVL) but also cause graft-versus-host disease  
562 (GVHD) (Bleakley *et al.*, 2012; Tugues *et al.*, 2018). Our data showed that CD8 T cells from  
563 *TCF-7 cKO* mice were able to clear tumor without causing GVHD, suggesting that *TCF-7* is  
564 dispensable for anti-tumor responses. Our data revealed that CD8 T cells from *TCF-7 cKO* mice  
565 mediate cytolytic function via NKG2D. We also confirmed this hypothesis by blocking the  
566 surface NKG2D by anti-NKG2D antibody on CD8 T cells from *TCF-7 cKO* and WT mice and  
567 performing an *in vitro* cytotoxicity assay. While the anti-tumor response of TCF1-deficient CD8  
568 T cell against A20 cells (which express the NKG2D ligands like Rae1, H60, and MULT1)



569 (Nishimura *et al.*, 2008) was diminished, cytotoxicity of WT CD8 T cells was not affected.  
570 Upregulation of the *KLRK1* gene (also known as NKG2D) in alloactivated *TCF-7* deficient  
571 CD8<sup>+</sup> donor T cells further confirmed our hypothesis. Furthermore, the increase in Granzyme B  
572 expression in *TCF-7* cKO CD8 T cells by flow cytometry and Western blot also provides  
573 evidence as to why the anti-tumor response is preserved despite weakened TCR signaling in  
574 *TCF-7* cKO CD8 T cells (Presotto *et al.*, 2017).

575         Once we had a clear mechanism for the GVL effect, we looked at functions that were  
576 altered in CD8 T cells from *TCF-7* cKO mice that could produce the attenuated GVHD effect.  
577 We discovered that the serum levels of cytokines like TNF $\alpha$  and IFN $\gamma$  were decreased in *TCF-7*  
578 deficient CD8 T cell-transplanted mice. Published data has shown the CD8 T cell lacking *TCF-7*  
579 develop exhaustion while clearing viral infection(Gautam *et al.*, 2019; Seo *et al.*, 2019) While the  
580 expression of TOX, an exhaustion marker, was not affected in freshly isolated or *in vitro*-  
581 stimulated *TCF-7* deficient CD8 T cells, alloactivated *TCF-7*-deficient CD8 donor T cells  
582 upregulated TOX at day 7 post-transplant (Scott *et al.*, 2019). Another exhaustion marker, PD-1,  
583 was upregulated after 72 hours in *in vitro*-stimulated CD8 T cells from *TCF-7* cKO mice, but *in*  
584 *vivo* expression of PD-1 in donor T cells was not increased (Wang *et al.*, 2019a; Xu *et al.*, 2019).  
585 This could be explained by differences between alloactivation *in vivo* and TCR-mediated  
586 activation *in vitro*. Ki-67, a proliferation marker, was also altered by loss of *TCF-7*, suggesting  
587 that CD8 T cells from *TCF-7* cKO mice may proliferate more compared to WT CD8 T cells  
588 (Sobecki *et al.*, 2016). We also confirmed that CD8 T cells from *TCF-7* cKO mice cause less  
589 tissue damage to the target organs, and loss of *TCF-7* alters chemokine receptor expression both  
590 pre- and post-transplant, which could explain why these cells cause less severe GVHD with  
591 increased survival of recipient mice (Ferrara, 2014).

592           These studies provide evidence for how *TCF-7* regulates the functions of peripheral T  
593 cells. The phenotype caused by loss of *TCF-7* is clinically optimal, because it allows for  
594 clearance of residual malignant cells while limiting the risk of life-threatening GVHD damage  
595 (Guinan et al., 1999). This observation, coupled with the increase in exhaustion of *TCF-7* cKO  
596 donor CD8 T cells, suggests that donor cells lacking *TCF-7* are highly activated and cytotoxic to  
597 malignant cells early on following transplant, but quickly become exhausted, limiting GVHD  
598 progression.

599           Finally, to identify the changes to the genetic program of donor T cells that occurred in the  
600 absence of *TCF-7*, we performed RNA sequencing analysis on pre- and post-transplant donor T  
601 cells. Even though we could not identify the Differentially Expressed Genes (DEGs) in pre-  
602 transplanted T cells (which we attribute to technical problems), gene set enrichment analysis  
603 revealed that loss of *TCF-7* alters the genetic signature of pre-transplanted CD8 T cells. A  
604 number of signaling pathways involved in cytokine production and cell cycle were enriched in  
605 pre-transplanted CD8 T cell from WT mice compared to cells from *TCF-7* cKO mice, suggesting  
606 that loss of *TCF-7* alters the transcriptional profile of the CD8 T cell towards decreased cytokine  
607 release, while altering the cell cycle in baseline and leading to the lessening of the allo-activation  
608 response. Meanwhile, 2548 DEGs (FDR<0.1) were identified when comparing post-transplanted  
609 CD8 T cells from *TCF-7* cKO mice and WT mice. Both GO Annotation analysis of DEGs and  
610 Gene Set Enrichment analysis revealed that a number of pathways such as Cell cycle, DNA  
611 replication, Metabolic pathways, TCR signaling, JAK-STAT signaling, and Chemokine receptor  
612 signaling were enriched in post-transplanted CD8 T cells from WT mice compared with cells  
613 from *TCF-7* cKO mice. Transcriptomic analysis also revealed that KLRK-1 gene for NKG2D  
614 were upregulated in allo-activated *TCF-7* cKO CD8<sup>+</sup> T cells compared to the WT CD8<sup>+</sup>T cells,

615 which confirming our findings in in-vitro cytotoxicity assay and flow cytometry data. These  
616 findings suggest that loss of *TCF-7* leads to changes in the transcriptomic profile of the CD8 T  
617 cells towards producing less cytokines and attenuating the T cell response, while increasing  
618 cytotoxicity. Chemokine receptor pathways were also enriched in alloactivated WT CD8 T cells  
619 which confirmed the qPCR analysis of chemokine receptors. The decrease in chemokine  
620 receptors helps to explain why we observed less tissue damage in GVHD target organs after allo-  
621 transplantation, and attenuated GVHD persistence, in mice given *TCF-7* cKO CD8 T cells. By  
622 using Western blotting, we also confirmed changes in TCR and JAK/STAT signaling before and  
623 after stimulation with anti-CD3/CD28, which helps to explain why we saw less serum cytokines  
624 at day 7 and day 14 post-transplant in mice given *TCF-7* cKO CD8 T cells. This also helps to  
625 explain why GVHD didn't persist in recipients given CD8 T cells which lack *TCF-7*.

626         Altogether, these data suggest that *TCF-7* is a major transcription factor that plays a role  
627 in T cell development. Our work shows that *TCF-7* is dispensable for cytotoxic function of  
628 mature alloactivated CD8 T cells but is indispensable for GVHD. TCR, JAK-STAT, and NF-  
629  $\kappa$ B signaling as well as cytokine production, these findings will help to establish an  
630 understanding of *TCF-7* as a critical factor in the GVHD/GVL regulatory network of CD8 T  
631 cells.

632

633

634

635

636

637

638

639

640

641 **Materials and Methods**

642

643 **Mouse Models.** For transplant, the following female donor mice were used: B6-Ly5.1

644 (CD45.1+, “WT” or B6.SJL-Ptprca Pepcb/BoyCr1, 494 from Charles River), C57Bl/6J

645 (CD45.2+, “WT”, 000664 from Jackson Laboratories), or Tcf7 flox x CD4cre (referred to here as

646 “*TCF-7 cKO*” (Ma *et al.*, 2012) , obtained from Dr. Jyoti Misra Sen at NIH by permission of Dr.

647 Howard Xue, and bred in-house),. These donor mice were age-matched to each other and to

648 recipients as closely as possible. BALB/c female mice (CR:028 from Charles River, age 6-8

649 weeks or older) were used as recipient mice for transplant experiments, and Thy1.1 mice

650 (B6.PL-Thy1a/CyJ, 000406 from Jackson Labs) were used as recipient mice for chimera

651 experiments.

652

653 **Allotransplant and Tumor Models.** BALB/c recipient mice were irradiated with two doses of

654 400 cGy of x-rays (total dose 800 cGy) and rested for at least 12 hours between doses. Mice

655 were also rested for 4 hours prior to transplantation. T cells (total CD3+ or CD8+) were

656 separated from WT and *TCF-7 cKO* spleens using CD90.2 or CD8 microbeads and LS columns

657 (Miltenyi, CD8: 130-117-044, CD90.2: 130-121-278, LS: 130-042-401).  $1 \times 10^6$  donor cells

658 (unless otherwise mentioned) were injected IV into the tail vein in PBS, along with  $10 \times 10^6$  WT

659 bone marrow cells. Bone marrow was T-cell depleted with CD90.2 MACS beads (130-121-278

660 from Miltenyi) and LD columns (130-042-901 from Miltenyi). For short-term experiments, at

661 day 7 post-transplant, recipient mice were euthanized and serum, spleen, lymph nodes, small

662 intestine, or liver were collected, depending on the experiment. For GVHD and GVL

663 experiments, recipient mice were also given  $2 \times 10^6$  luciferase expressing B-cell lymphoma (A-

664 20) (Edinger *et al.*, 2003a). Recipient mice were weighed, given a clinical score, and imaged

665 using the IVIS 50 imaging system three times per week until day 70 or longer. Clinical scores  
666 were composed of scores for skin integrity, fur texture, posture, activity, diarrhea, and weight  
667 loss. Imaging was done by injecting recipients I.P. with D-luciferin to detect tumor cell  
668 bioluminescence. To produce mixed bone marrow chimeras, Thy1.1 mice were lethally  
669 irradiated and reconstituted with a 1:4 (WT: *TCF-7 cKO*) mixture of bone marrow cells (total  
670  $50 \times 10^6$  cells), then rested for 9 weeks. At 9 weeks, tail vein blood was collected and checked by  
671 flow cytometry for CD45.1 and CD45.2 to ensure reconstitution with both donor cell types. At  
672 10 weeks, mice were used for phenotyping experiments.

673

674 **Flow Cytometry, Sorting, and Phenotyping.** Splenocytes (or cells from other organs) were  
675 obtained from WT or *TCF-7 cKO* mice or recipient allotransplanted mice. Lymphocytes were  
676 obtained and lysed with RBC Lysis Buffer (00-4333-57 from eBioscience) to remove red blood  
677 cells if needed. Cells were then stained with extracellular markers for 30 min on ice in MACS  
678 buffer (1X PBS with EDTA and 4g/L BSA). If intracellular markers were used, the cells were  
679 then fixed and permeabilized using the Fix/Perm Concentrate and Fixation Diluent from FOXP3  
680 Transcription Factor Staining Buffer Set (eBioscience cat. No. 00-5523-00). The cells were then  
681 run on a BD LSR Fortessa cytometer and data were analyzed using FlowJo software v9  
682 (Treestar). All antibodies were used at a 1:100 dilution. For FACS sorting, the same methods  
683 were applied, and cells were run on a BD FACS Aria IIIu with cold-sorting blocks. Cells were  
684 sorted into sorting media (10% FBS in RPMI) or Trizol, depending on the experiment.

685 Depending on the experiment, antibodies used were: anti-CD4 (FITC, PE, BV785, BV21), anti-  
686 CD8 (FITC, PE, APC, PerCP, Pacific Blue, PE/Cy7), anti-CD3 (BV605 or APC/Cy7), anti-  
687 H2Kb-Pacific Blue, anti-H2Kd-PE/Cy7, anti-CD122 (FITC or APC), anti-CD44 (APC or Pacific

688 Blue), anti-CD62L (APC/Cy7), anti-TNF- $\alpha$ -FITC, anti-IFN- $\gamma$ -APC, anti-Eomes (AF488 or  
689 PE/Cy7), anti-T-bet-BV421, anti-CD45.2-PE/Dazzle594, anti-CD45.1-APC, anti-Ki67 (PE or  
690 BV421), anti-PD1-BV785, anti-CTLA4-PE, NKG2D-BV711, Granzyme B-PE/Cy7.

691

692 **Histology.** Recipient mice were allotransplanted as described, and organs were removed for  
693 histology at day 7, and day 21 post-transplant. Spleen, liver, small intestine, and skin (from ear  
694 and back) were fixed, sectioned, and stained with H&E at Cornell University (

695 <https://www.vet.cornell.edu/animal-health-diagnostic-center/laboratories/anatomic->

696 [pathology/services](https://www.vet.cornell.edu/animal-health-diagnostic-center/laboratories/anatomic-pathology/services)). A pathologist (L.S) analyzed the sections for T cell-induced damage.

697

698 **Cytokine Restimulation.** Recipient BALB/c mice were allotransplanted with  $1.5 \times 10^6$  CD3  
699 donor T cells and euthanized at day 7. Splenocytes were taken and cultured for 6 hours with  
700 GolgiPlug (1:1000) and PBS (control) or anti-CD3 (1 $\mu$ g/mL)/anti-CD28 (2 $\mu$ g/mL) (TCR  
701 stimulation) at 37 C and 7% CO<sub>2</sub>. After 6 hours of culture, the cells were stained for CD3, CD4,  
702 CD8, H2K<sup>b</sup>, TNF- $\alpha$ , and IFN- $\gamma$  using the BD Cytokine Staining kit (BD Biosciences, 555028),  
703 and run on a flow cytometer.

704

705 **LegendPLEX Serum ELISA Assay.** Serum from cardiac blood was collected from recipient  
706 mice in the cytokine restimulation experiment. Serum was analyzed using the Biolegend  
707 LEGENDPlex Assay Mouse Th Cytokine Panel kit (741043). This kit quantifies serum  
708 concentrations of: IL-2 (T cell proliferation), IFN- $\gamma$  and TNF- $\alpha$  (Th1 cells, inflammatory), IL-4,  
709 IL-5, and IL-13 (Th2 cells), IL-10 (Treg cells, suppressive), IL-17A/F (Th17 cells), IL-21 (Tfh

710 cells), IL-22 (Th22 cells), IL-6 (acute/chronic inflammation/T cell survival factor), and IL-9  
711 (Th2, Th17, iTreg, Th9 – skin/allergic/intestinal inflammation).

712

713 **Western blot.** Splenocytes from WT or *TCF-7* cKO donor mice were collected. CD8 T cells  
714 were separated using CD8 MACS beads. CD8 T cells were either stimulated with 2.5ug/ml anti-  
715 CD3 (Biolegend #100202) and anti-CD28 antibodies (Biolegend #102115) for 10 minutes or left  
716 unstimulated. These cells were counted and lysed with RIPA Buffer (89900 from Thermo Fisher)  
717 plus protease inhibitors (11697498001 from Millipore Sigma) and phosphatase inhibitors  
718 (P5726-1ML and P0044-1ML from Millipore Sigma). The lysates were run on a Western blot  
719 and probed for Perforin (Cell Signaling Technology #3693), Granzyme B (Cell Signaling  
720 Technology #4275), LCK (Thermo Fisher PA5-34653), ZAP70(Cell Signaling Technology  
721 #3165), LAT(Cell Signaling Technology # 45533), ITK (Thermo Fisher PA5-49363), PLC $\gamma$ 1  
722 (Cell Signaling Technology #2822), ERK1-2 (Cell Signaling Technology #9107), JAK 2(Cell  
723 Signaling Technology # 3230), JAK3 (Cell Signaling Technology #8863), STAT3 (Cell  
724 Signaling Technology #9139), p65-Rela (Cell Signaling Technology #4764), AKT (Cell  
725 Signaling Technology #9272), , and  $\beta$ -actin (Cell Signaling Technology #4970). All the western  
726 blots repeated at least three times and one representative of each protein and quantification is  
727 shown.

728

729 **qPCR Analysis.** To perform qPCR, BALB/c mice were allotransplanted as described ( $1 \times 10^6$   
730 CD3 donor T cells). Pre-transplant donor cells and post-transplant (day 7) spleen and liver cells  
731 from recipients were FACS-sorted to obtain CD8 donor cells. The cells were sorted into Trizol,  
732 RNA was extracted using chloroform (<https://www.nationwidechildrens.org/>)

733 Document/Get/93327), and eluted using the Qiagen RNEasy Mini kit (74104 from Qiagen).  
734 Concentration was checked with a spectrophotometer, then RNA was converted to cDNA with  
735 an Invitrogen Super Script IV First Strand synthesis System kit (18091050 from Invitrogen).  
736 Final cDNA concentration was checked with a spectrophotometer, then cDNA was mixed with  
737 Taqman Fast Advanced Master Mix (4444557 from Invitrogen) at a 10ng/ $\mu$ L cDNA  
738 concentration. This master mix was added to premade 96 well TaqMan Array plates with  
739 chemokine/chemokine receptor primers (Thermo Fisher, Mouse Chemokines & Receptors Array  
740 plate, 4391524). qPCR was performed in a Quant Studio 3 thermocycler, and data were analyzed  
741 using the Design and Analysis software v2.4 (provided by Thermo Fisher). Five separate  
742 recipient mice were sorted, and cells were combined to make one sample for qPCR testing per  
743 condition/organ.

744

745 **NKG2D expression and NKG2D mediated cytotoxicity in CD8 T cells.** To determine the  
746 NKG2D expression in CD8 T cells, we obtained splenocytes from WT and *TCF-7* cKO mice and  
747 stimulated T cells with 2.5ug/ml anti-CD3 (Biolegend #100202) and anti-CD28 antibodies  
748 (Biolegend #102115) for 24, 48, or 72 hours in culture, or left them unstimulated. GolgiPlug  
749 (1:1000) was added to stimulated samples for each time point, and samples were incubated at 37  
750 C and 7% CO<sub>2</sub>. After 6 hours of culture, the cells were stained with LIVE/DEAD Aqua and for  
751 CD3, CD8, NKG2D, and Granzyme B using the BD Cytokine Staining kit (BD Biosciences,  
752 555028), and run on a flow cytometer. To assess the NKG2D mediated cytotoxicity, we used  
753 luciferase-expressing A20 cells as target cells as described earlier. Effector cells (MACS-sorted  
754 CD8 T cells from *TCF-7* cKO or WT mice) were incubated in 2.5 $\mu$ g/ml anti-CD3 and anti-CD28  
755 coated plates for 48 hours to induce optimal NKG2D expression. Then effector cells were added



756 at 40:1 effector-to-target ratios and incubated at 37°C for 4 hours with the A20 cells. Anti-  
757 NKG2D antibody (10 µg/mL, Bio X Cell #BE0334) or rat IgG1 isotype control antibody (10  
758 µg/mL, Bio X Cell #BE0334) was added and incubated for 30 minutes before washing and  
759 plating. Triplicate wells were averaged and percent lysis was calculated from the data using the  
760 following equation: % specific lysis =  $100 \times (\text{spontaneous death bioluminescence} - \text{test}$   
761  $\text{bioluminescence}) / (\text{spontaneous death bioluminescence} - \text{maximal killing bioluminescence})$ .

762

763 **Exhaustion/Activation Assay.** To determine the *in vitro* exhaustion and activation of CD8 T  
764 cells, we obtained splenocytes from WT and *TCF-7* cKO mice and either activated them with  
765 2.5ug/ml anti-CD3 (Biolegend #100202) and anti-CD28 antibodies (Biolegend #102115) for 24,  
766 48, or 72 hours in culture, or left them unstimulated, and stained for CD3, CD8, Ki-67, Tox, and  
767 PD-1 markers. To assess exhaustion and activation of *in vivo* donor CD8 T cells, recipient mice  
768 were allotransplanted as before ( $1 \times 10^6$  CD3 donor T cells) and euthanized at day 7.  
769 Lymphocytes were obtained from spleen, and stained for CD3, CD4, CD8, H2K<sup>b</sup>, TOX, Ki-67  
770 and PD-1 markers.

771

772 **DNA Extraction and PCR.** Donor mice were genotyped using PCR on DNA extracted from ear  
773 punches. At 4 weeks of age mice were ear punched, and DNA was extracted using the Accustart  
774 II Mouse Genotyping kit (95135-500 from Quanta Biosciences). Standard PCR reaction  
775 conditions and primer sequences from Jackson Laboratories were used for CD4cre. For Tcf7,  
776 primer sequences and reaction conditions were obtained from Dr. Jyoti Misra Sen of NIH.

777

778 **RNA Sequencing.** Recipient mice were allotransplanted as before ( $1 \times 10^6$  CD3 donor T cells),  
779 except that donor CD8 T cells were also FACS-sorted prior to transplant. A sample of sorted  
780 donor cells was also saved for pre-transplanted RNA sequencing in Trizol. At day 7 post-  
781 transplant, donor CD8 T cells were FACS-sorted back from recipient spleen of *TCF-7* cKO and  
782 WT transplanted mice. The cells were all sorted into Trizol, then RNA was extracted and  
783 prepped by the Molecular Analysis Core (SUNY Upstate,  
784 <https://www.upstate.edu/research/facilities/molecular-analysis.php>). Paired end sequencing was  
785 done with an Illumina NovaSeq 6000 system at the University at Buffalo Genomics Core  
786 (<http://ubnextgencore.buffalo.edu>). For data analysis we used the statistical computing  
787 environment R (v4.0.4), the Bioconductor suite of packages for R, and R studio (v1.4.1106). We  
788 calculated the transcript abundance by performing pseudoalignment using the Kallisto (Bray et  
789 al., 2016) (version 0.46.2). Calculated Transcript per million (TPM) values were normalized and  
790 fitted to a linear model by empirical Bayes method with the Voom (Law et al., 2014) and Limma  
791 (Ritchie et al., 2015) R packages to determine Differentially expressed genes – DEGs (FDR<0.1,  
792 after controlling for multiple testing using the Benjamini-Hochberg method). DEG's were used  
793 for hierarchical clustering and heatmap generation in R. Gene Ontology enrichment analysis was  
794 conducted using either the Function Annotation Chart tools using only GO BP and KEGG terms  
795 in the Database for Visualization and Integrative Discovery (Huang da et al., 2009a; b) (Huang  
796 da *et al.*, 2009a) DAVID enrichment scores >1.3 are equivalent to a P value<0.05. For Gene set  
797 enrichment analysis (GSEA) we used Hallmark and C2 gene set collections of Molecular  
798 Signatures Database (MsigDB) and cluster Profiler package in R. Data will be deposited on the  
799 Gene Expression Omnibus (GEO) database for public access  
800 <https://www.ncbi.nlm.nih.gov/geo/>

801 The RNAseq experiment described here was performed as part of the experiment described in  
802 other recent publications from our laboratory (Mammadli et al., 2021a; Mammadli et al., 2021b;  
803 Mammadli et al., 2020; Mammadli et al., 2021c). Therefore, the data generated for WT pre- and  
804 post-transplanted samples (CD4 and CD8) are the same as that shown in the papers mentioned,  
805 but here, these data are compared to data for *Cat-Tg* mice(Mammadli *et al.*, 2021a).

806

807 **Statistical Analysis.** Unless otherwise noted in the figure legends, all numerical data are  
808 presented as means and standard deviations with or without individual points. Analysis was done  
809 in GraphPad Prism v7 or v9. Most data were analyzed with Student's t-test, one-way ANOVA,  
810 or two-way ANOVA, with Tukey's multiple comparisons test for ANOVA methods, depending  
811 on the number of groups. Kaplan-Meier survival analyses were done for survival experiments.  
812 All tests were two-sided, and p-values less than or equal to ( $\leq$ ) 0.05 were considered significant.  
813 Transplant experiments used 3-5 mice per group, with at least two repeats. *Ex vivo* experiments  
814 were done two to three times unless otherwise noted with at least three replicates per condition  
815 each time. RNA seq was done once with three replicates per group and condition. qPCR was  
816 done once with one sample per condition, and 5 mice were combined to make the one sample.  
817 Western blots were done 3 times for unstimulated and 10 min anti-CD3/CD28 stimulated  
818 samples, one experiment each is shown.

819

820 **Study Approval.** All animal studies were reviewed and approved by the IACUC at SUNY  
821 Upstate Medical University. All procedures and experiments were performed according to these  
822 approved protocols.

823

824 **Author Contributions**

825 RH, MM, and MK designed and conducted experiments, analyzed data, and wrote the  
826 manuscript. MK assisted with scientific/technical research design. MK, and JMS edited the  
827 manuscript. MK, SH assisted with data collection. LS performed histology analyses. QY  
828 provided technical and scientific advice and assisted with data analysis.

829

830 **Acknowledgments**

831 We thank all members of the Karimi lab for helpful discussions. We also thank Joel Wilmore for  
832 help in flow cytometry analysis. This research was funded in part by a grant from the National  
833 Blood Foundation Scholar Award to MK, the National Institutes of Health (NIH LRP #L6  
834 MD0010106 and K22 (AI130182) to MK), and an Upstate Medical University Cancer Center  
835 grant (1146249-1-75632) to MK.

836 JMS was supported by the Intramural Research Program of the National Institute of  
837 Aging. We thank Dr. Howard Xue for permission to use *TCF-7* cKO mice. *TCF-7* flox/flox  
838 mice were provided by Dr. Jyoti Misra Sen from NIH. RH was a PH. D student at SUNY  
839 Upstate Medical University at the time the study was conducted from 2017-2021. A version of  
840 this manuscript was previously included as a chapter in RH's dissertation.

841

842

843

844

845

846

847

848

849

850

851

852

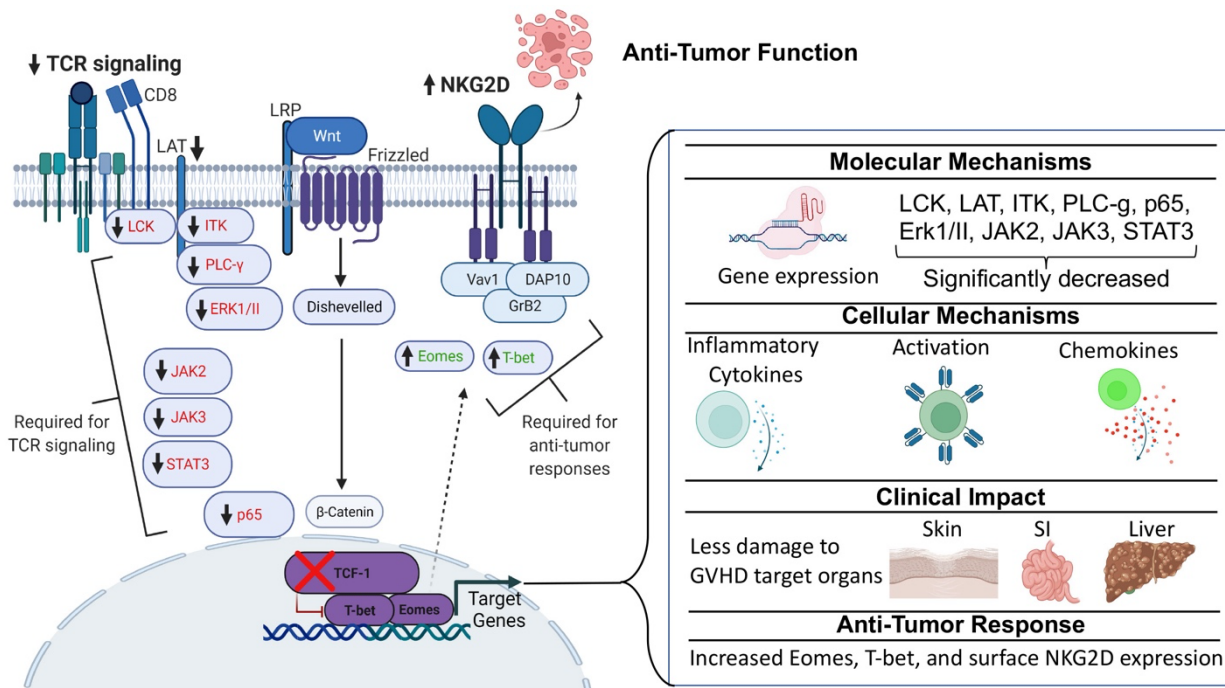

853

854 **Summary Figure: *TCF-7* is required for persistent function of CD8 T cells but dispensable**

855 **for anti-tumor response.** Here we have utilized a novel mouse model that lacks *TCF-7*

856 specifically on CD8 T cells for an allogeneic transplant model. We uncovered a molecular

857 mechanism of how *TCF-7* regulates key signaling pathways at both transcriptomic and protein

858 levels. These key molecules included LCK, LAT, ITK, PLC- $\gamma$ 1, p65, ERK I/II, and JAK/STAT

859 signaling. Next, we showed that the lack of *TCF-7* impacted phenotype, proinflammatory

860 cytokine production, chemokine expression, T cell activation. We provided clinical evidence for

861 how these changes impact GVHD target organs (skin, small intestine, and liver). Finally, we

862 provided evidence that *TCF-7* regulates NKG2D expression on mouse naïve and activated CD8

863 T cells. We have shown that CD8 T cells from *TCF-7* cKO mice mediate cytolytic functions via

864 NKG2D.

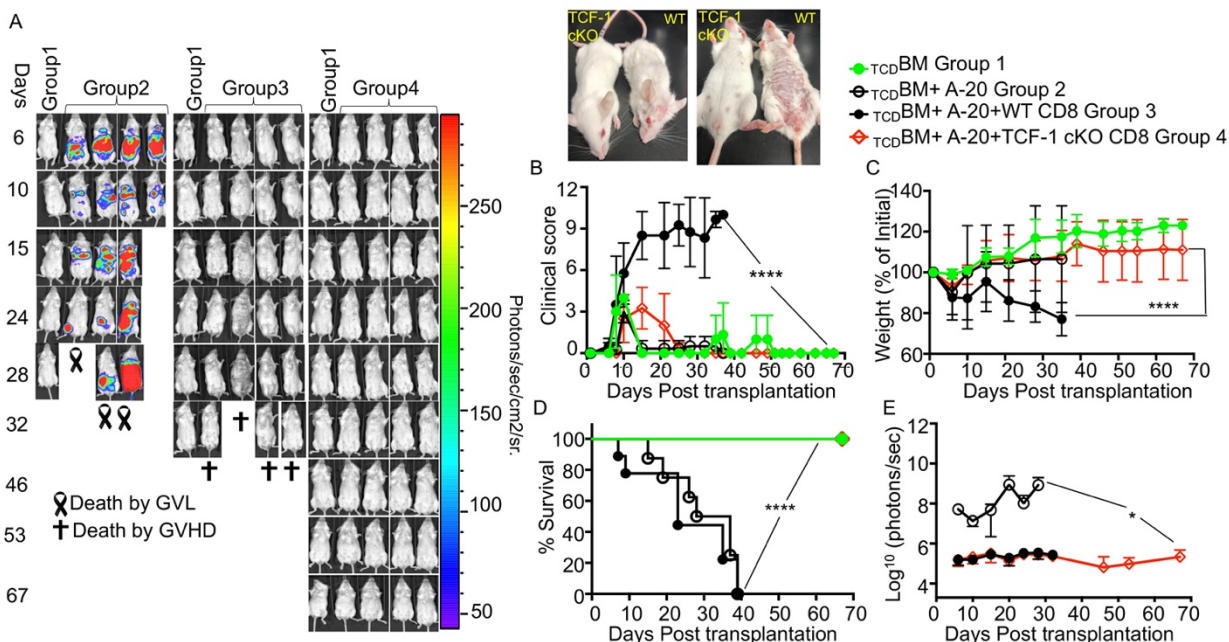

865

866 **Figure 1: Loss of *TCF-7* in donor CD8 T cells reduces severity and persistence of GVHD**

867 **symptoms.** BALB/c recipient mice (MHC haplotype d) were lethally irradiated and

868 allotransplanted with  $1 \times 10^6$  CD8 T cells from WT or *TCF-7* cKO donor mice (MHC haplotype

869 b), as well as  $10 \times 10^6$  T cell-depleted bone marrow cells (BM) from WT mice (MHC haplotype

870 b). Recipient mice were also given  $2 \times 10^5$  luciferase-expressing A20 tumor cells (A) The

871 recipient mice were imaged 1 time a week using IVIS50 for 70 days. Gross pictures of

872 representatives of recipients transplanted with CD8 T cells from *TCF-7* cKO and WT mice at

873 day 25 post-transplant are shown. (B) Recipient mice were also given a GVHD clinical score

874 three times per week until day 70, based on combined scores of fur texture, activity level, weight

875 loss, posture, skin integrity, and diarrhea. Mean and SD are plotted, analyzed by one-way

876 ANOVA. (C) Weight changes of the recipient mice also were tracked over the time course of

877 disease. (D) Survival for each group of recipient mice up to 70 days post-transplant, analyzed by

878 Kaplan-Meier survival analysis. (E) Quantification of bioluminescence of tumor growth. For all

879 graphs, \* means  $p$ -value  $\leq 0.05$ , \*\* means  $p$ -value  $\leq 0.01$ , \*\*\* means  $p$ -value  $\leq 0.001$ , and \*\*\*\*

880 means  $p$ -value  $\leq 0.0001$  ( $n = 3$  mice/group for BM alone:  $n = 4$  experimental mice/group for all  
 881 other groups). Survival is a combination of two experiments. Note: Control mouse is one of the  
 882 mice from bone marrow only transplanted group used as a negative control for BLI.  
 883

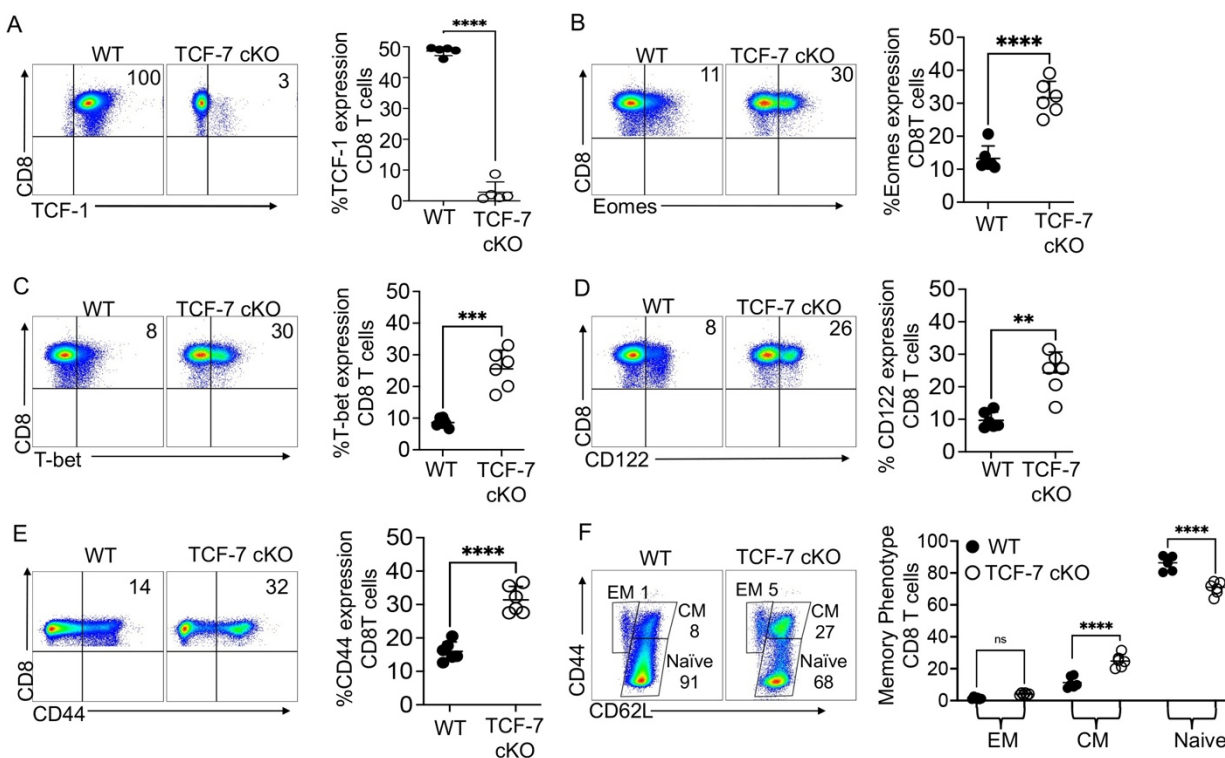

884  
 885 **Figure 2. Loss of *TCF-7* changes the mature CD8 T cell phenotype.** Naive WT or *TCF-7*  
 886 cKO donor mice were euthanized and splenocytes were stained for flow cytometry phenotyping.  
 887 (A) Percent of CD8 T cells expressing *TCF-7* and quantified statistical analysis (B) Percent of  
 888 CD8 T cells expressing Eomes and quantified statistical analysis. (C) Percent of CD8 T cells  
 889 expressing T-bet and quantified statistical analysis. (D) Percent of CD8 T cells expressing  
 890 CD122 and quantified statistical analysis. (E) Percent of CD8 T cells expressing CD44 and  
 891 quantified statistical analysis. (F) Percent of CD8 T cells expressing central memory, effector  
 892 memory, or naive phenotypes and quantified statistical analysis. All data are plotted as individual

893 points with mean and SD, all were analyzed with one-way ANOVA, or Student's t-test  
 894 (depending on groups). For all graphs, \* means p-value  $\leq 0.05$ , \*\* means p-value  $\leq 0.01$ , \*\*\*  
 895 means p-value  $\leq 0.001$ , and \*\*\*\* means p-value  $\leq 0.0001$ . N=2-3 per group per experiment, with  
 896 combined data from 3 experiments shown.

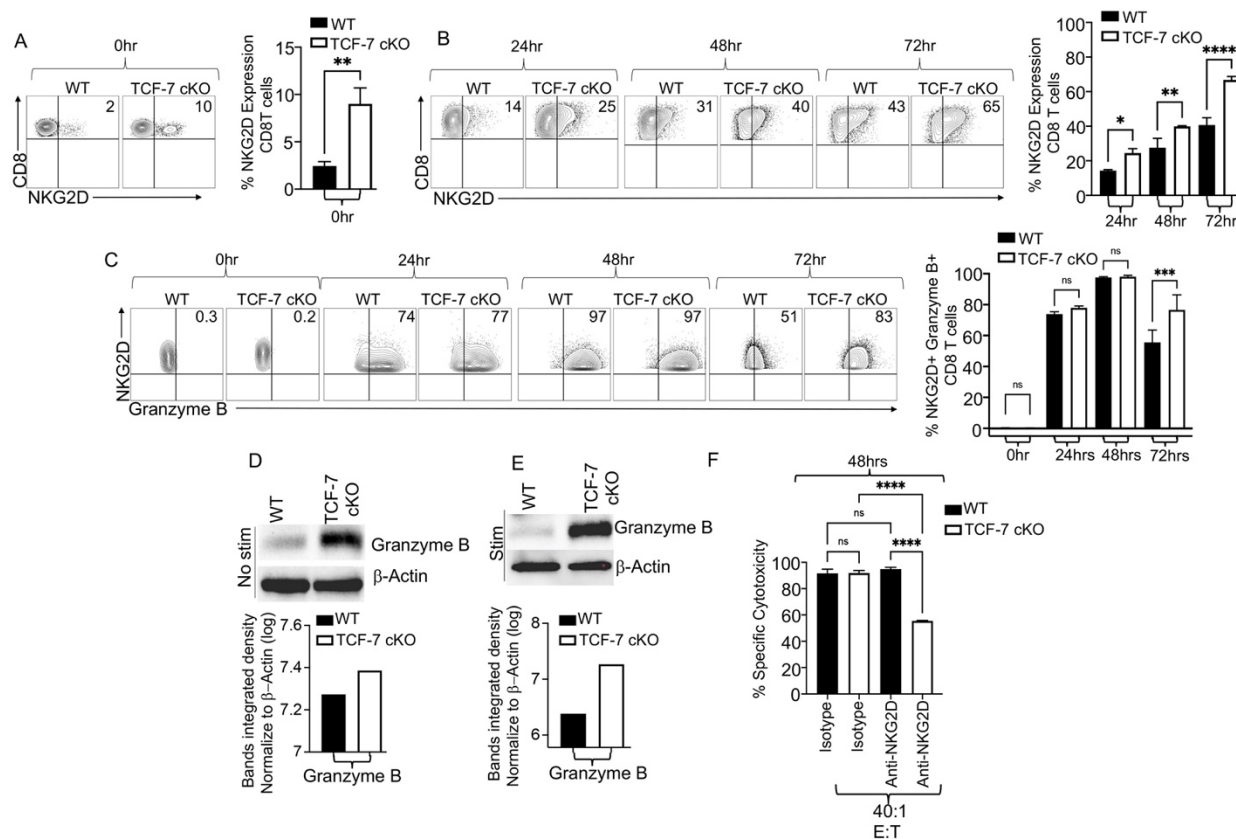

897

898 **Figure 3: Loss of *TCF-7* alters cytotoxic mediator production by mature alloactivated CD8**

899 **T cells.** Total splenocytes were isolated from *TCF-7* cKO or WT mice and either left

900 unstimulated or stimulated with anti-CD3/CD28 for 24, 48, or 72 hours in culture. GolgiPlug

901 (1:1000) was added to stimulated samples in each time point except 0-hour samples, and samples

902 were incubated at 37 C with 7% CO<sub>2</sub>. After 6 hours of culture, the cells were stained with

903 LIVE/DEAD Aqua, and for CD3, CD8, NKG2D, and Granzyme B expression, as determined by

904 flow cytometry. (A) Percent of NKG2D expression in freshly isolated CD8 T cells from WT or



905 *TCF-7* cKO mice and quantified statistical analysis. **(B)** Percent of NKG2D expression in 24, 48,  
906 or 72 hour-stimulated CD8 T cells from WT and *TCF-7* cKO mice and quantified statistical  
907 analysis. **(C)** Percent of Granzyme B expression in unstimulated or 24, 48, or 72 hour-stimulated  
908 CD3<sup>+</sup> CD8<sup>+</sup> NKG2D<sup>+</sup> T cells from WT and *TCF-7* cKO mice, and quantified statistical  
909 analysis. **(D)** Granzyme B expression in unstimulated CD8 T cells from WT and *TCF-7* cKO  
910 mice by Western blot, and bands' integrated density normalized to  $\beta$ -actin (quantified). **(E)**  
911 Granzyme B expression in 10 minute-anti-CD3/CD28-stimulated CD8 T cells from WT and  
912 *TCF-7* cKO mice by Western blot, and bands' integrated density normalized to  $\beta$ -actin  
913 (quantified) **(F)** To assess the NKG2D-mediated cytotoxicity, we used luciferase-expressing A20  
914 cells as target cells. Effector cells (MACS-sorted CD8 T cells from *TCF-7* cKO or WT mice)  
915 were incubated in 2.5 $\mu$ g/ml anti-CD3 and anti-CD28 coated plates for 48 hours to induce optimal  
916 NKG2D expression. Then effector cells were added at 40:1 effector-to-target ratios and  
917 incubated at 37°C for 4 hours with A20 cells. Anti-NKG2D antibody (10  $\mu$ g/mL) or rat IgG1  
918 isotype control antibody (10  $\mu$ g/mL) was added and incubated for 30 minutes before washing  
919 and plating. Triplicate wells were averaged and percent lysis was calculated from the data using  
920 the following equation: % specific lysis =  $100 \times (\text{spontaneous death bioluminescence} - \text{test}$   
921  $\text{bioluminescence}) / (\text{spontaneous death bioluminescence} - \text{maximal killing}$   
922  $\text{bioluminescence})$  (Karimi et al., 2014a; Karimi et al., 2015; Karimi et al., 2014b). N=4 per group  
923 with one representative of 2 experiments shown. Western blot were repeated twice and  
924 representative examples are shown. All data are shown as individual points with mean and SD,  
925 and were analyzed with Student's t-test or one-way ANOVA (depending on groups). \* means p-  
926 value  $\leq 0.05$ , \*\* means p-value  $\leq 0.01$ , and \*\*\* means p-value  $\leq 0.001$ .

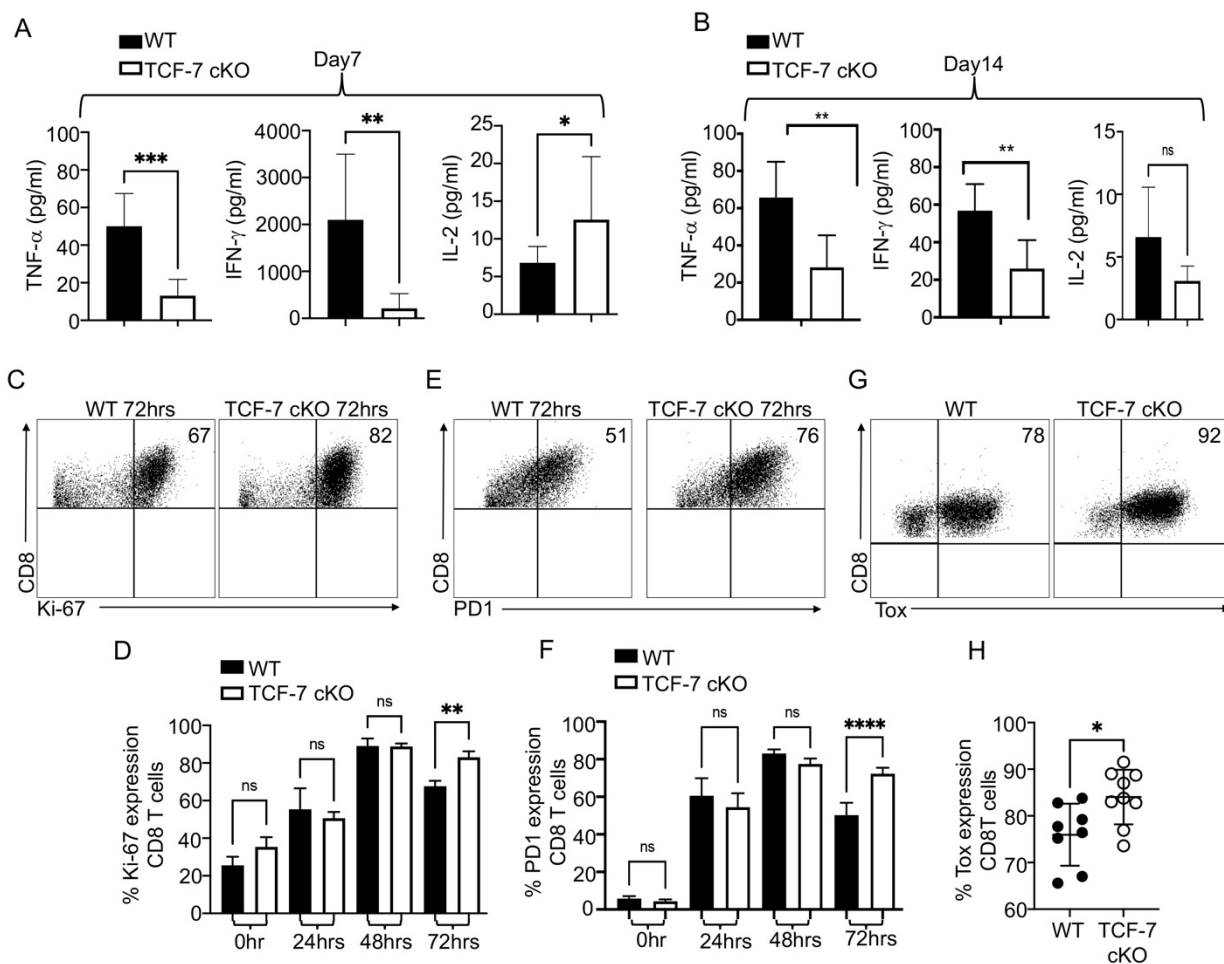

927

928 **Fig.4. TCF-7 controls cytokine production and exhaustion of mature alloactivated CD8 T**

929 **cells. (A-B)** Recipient mice were allotransplanted with  $1.5 \times 10^6$  WT or *TCF-7* cKO donor CD3 T

930 cells as before. At day 7 and day 14 post-transplant, serum was obtained from cardiac blood of

931 allotransplanted recipient mice and tested for various cytokines using a LEGENDplex ELISA

932 assay. **(A)** Serum levels (pg/mL) of TNF- $\alpha$ , IFN- $\gamma$ , and IL-2 for WT and *TCF-7* cKO-

933 transplanted mice at day 7 post-transplant. **(B)** Serum levels (pg/mL) of TNF- $\alpha$ , IFN- $\gamma$ , and IL-2

934 for WT and *TCF-7* cKO-transplanted mice at day 14 post-transplant. **(C-F)** Splenocytes from

935 *TCF-7* cKO and WT mice were obtained and stimulated with anti-CD3/CD28 antibodies for

936 24hrs, 48hrs, or 72hrs in culture and stained for Ki-67 and PD-1 or were stained immediately

937 after isolation without stimulation. **(C)** Percent expression of Ki-67 in CD8 T cells after 72

938 hours of anti-CD3/CD28 stimulation in culture determined by flow cytometry. **(D)**  
939 Quantification of the *in vitro* Ki-67 expression of CD8 T cells at different time points. **(E)**  
940 Percent expression of PD-1 in CD8 T cells after 72 hours of anti-CD3/CD28 stimulation in  
941 culture determined by flow cytometry. **(F)** Quantification of the *in vitro* PD-1 expression of CD8  
942 T cells at different time points. **(G-H)** Balb/c mice were allotransplanted as before, with WT or  
943 *TCF-7* cKO CD8 donor T cells. On day 7, spleens were removed from recipients, processed to  
944 isolate lymphocytes, and spleen-derived lymphocytes from allotransplanted recipient mice were  
945 stained for CD3, CD8, H2K<sup>b</sup>, and TOX to identify exhausted T cells. **(G)** Percent expression of  
946 TOX in CD8 T cells after allotransplantation (day 7 post-transplant) as determined by flow  
947 cytometry. **(H)** Quantification of the TOX expression in *in vivo* donor CD8 T cells. N=3-5 per  
948 group for **A-B** with two experiments shown. N=4 per group for **C-F**, one representative of two  
949 experiments shown. N=3-5 per group with one representative experiment shown for **G-H**. All  
950 data are shown as individual points with mean and SD, and were analyzed with Student's t-test  
951 or two-way ANOVA (depending on groups). \* means p-value  $\leq 0.05$ , \*\* means p-value  $\leq 0.01$ ,  
952 and \*\*\* means p-value  $\leq 0.001$ .

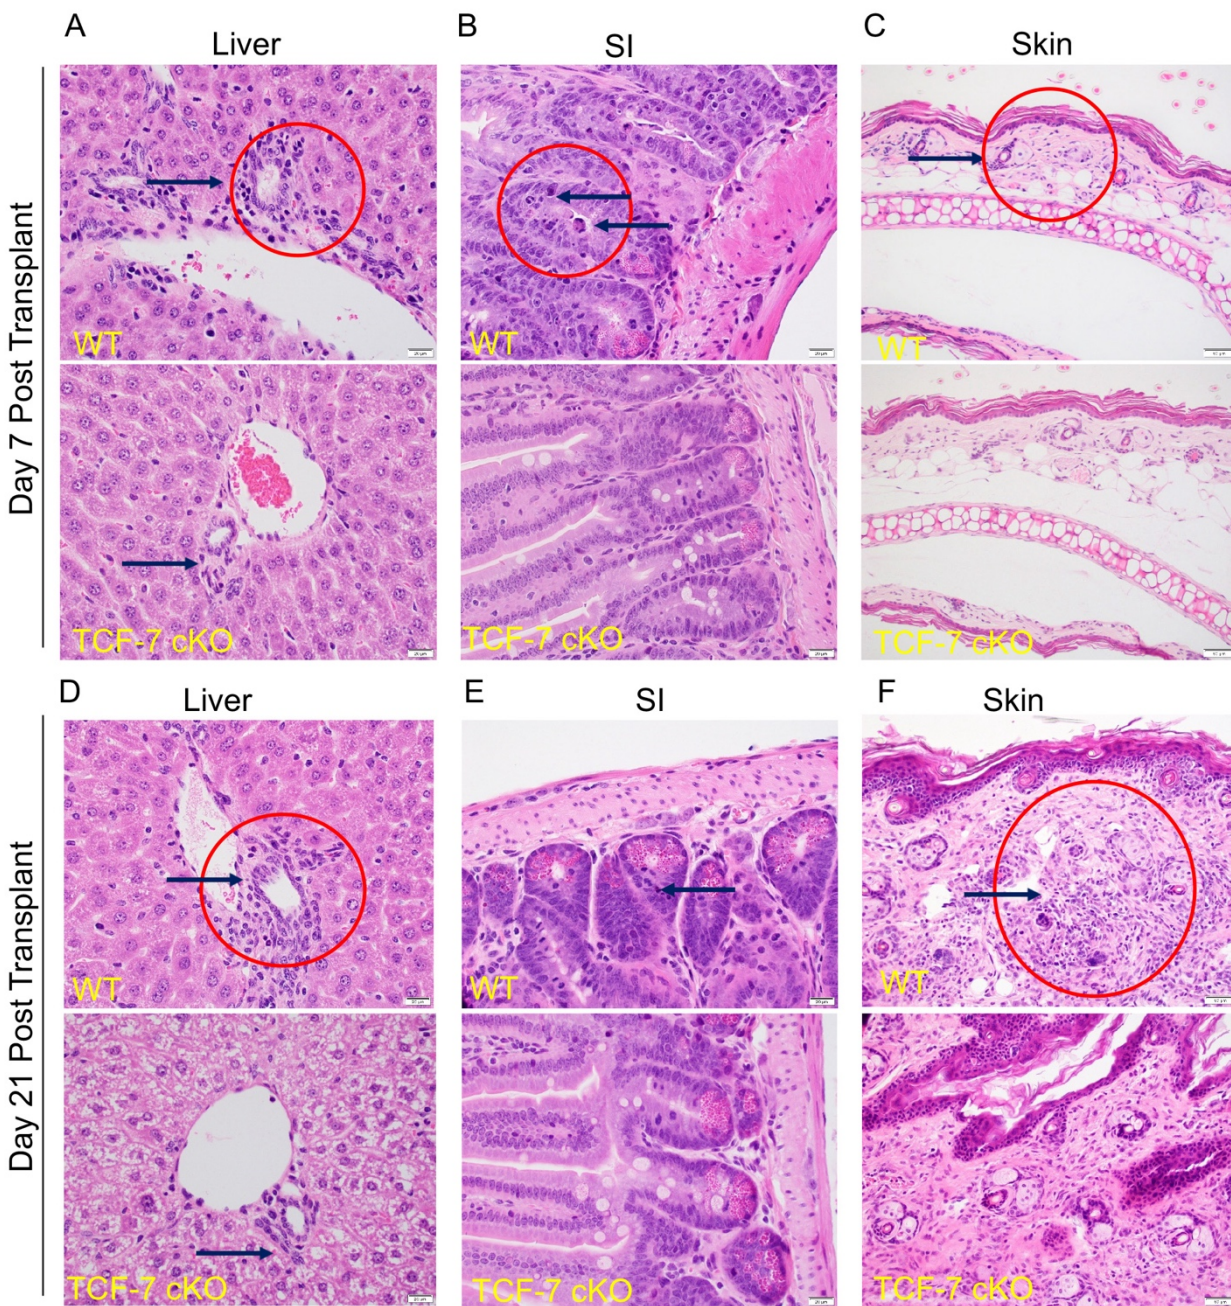

953

954 **Fig.5. Loss of *TCF-7* in donor CD8 T cells decrease the damage to the GVHD target organs.**

955 We collected organs from mice allotransplanted as described above. At day 7 and day 21 post-  
956 transplant, organs were taken from recipient mice for histology analyses. Skin, liver, spleen, and  
957 small intestine were sectioned, stained with H&E and analyzed by pathologist. Representative  
958 sections for each organ per group and timepoint are shown. (A) H&E staining of the liver of the

959 recipient mice at day 7 post-transplant (black arrows showing the interlobular bile ducts and red  
 960 circle showing inflammatory infiltrates). **(B)** H&E staining of the small intestines of the recipient  
 961 mice at day 7 post-transplant (black arrows showing the crypts of the small intestine and red  
 962 circle showing apoptotic bodies). **(C)** H&E staining of the skin of the recipient mice at day 7  
 963 post-transplant (black arrows showing the dermis of the skin and red circle showing increase of  
 964 inflammatory cells) **(D)** H&E staining of the liver of the recipient mice at day 21 post-transplant  
 965 (black arrows showing the interlobular bile ducts and red circle showing inflammatory  
 966 infiltrates). **(E)** H&E staining of the small intestines of the recipient mice at day 21 post-  
 967 transplant (blacks arrows showing apoptotic bodies). **(F)** H&E staining of the skin of the  
 968 recipient mice at day 21 (black arrows showing dermis of skin and red circle showing increased  
 969 inflammatory cells with destructed adnexal glands).

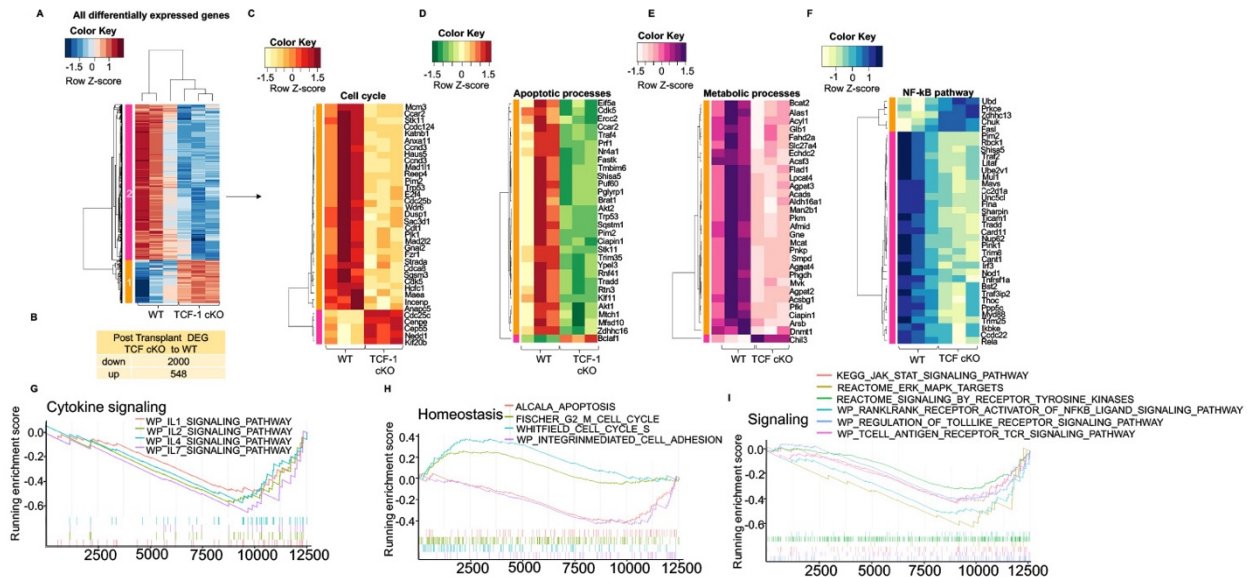

970

971 **Fig.6. Loss of *TCF-7* changes the genetic signature of alloactivated donor CD8 T cells.**

972 CD8 T cells from WT and *TCF-7* cKO mice were FACS sorted either into Trizol as pre-

973 transplanted samples, or into 10% FBS-containing media for transplantation into recipient mice

974 as described previously. At day 7 post-transplant, donor CD8 T cells were FACS-sorted back

975 from recipient spleens of *TCF-7* cKO- and WT-transplanted mice. RNA was extracted and  
976 prepped by the Molecular Analysis Core (SUNY Upstate). Paired end sequencing was done with  
977 an Illumina NovaSeq 6000 system at the University at Buffalo Genomics Core. For data analysis,  
978 we used the statistical computing environment R (v4.0.4), the Bioconductor suite of packages for  
979 R, and RStudio (v1.4.1106). We calculated the transcript abundance by performing  
980 pseudoalignment using Kallisto. **(A)** Hierarchical clustering of genes and samples, heatmap  
981 illustrating the expression of the differentially expressing genes (DEG's; FDR<0.1) of post-  
982 transplanted CD8 T cells *TCF-7* cKO compared to WT. **(B)** Table showing the number of up- or  
983 downregulated DEGs in post-transplanted CD8 T cells (*TCF-7* cKO compared to WT). **(C)**  
984 Heatmap showing top significant 35 differentially expressed genes that play a role in the Cell  
985 Cycle pathway, identified using DAVID Functional Annotation Analysis and GO-BP terms in  
986 post-transplanted CD8 T cells (*TCF-7* cKO compared to WT). **(D)** Heatmap showing top  
987 significant 30 differentially expressed genes that play a role in the Apoptotic Processes pathway,  
988 identified using DAVID Functional Annotation Analysis and GO-BP terms in post-transplanted  
989 CD8 T cells (*TCF-7* cKO compared to WT). **(E)** Heatmap showing top significant 30  
990 differentially expressed genes that play a role in the Metabolic Processes pathway, identified  
991 using DAVID Functional Annotation Analysis and GO-BP terms in post-transplanted CD8 T  
992 cells (*TCF-7* cKO compared to WT). **(F)** Heatmap showing top significant 35 differentially  
993 expressed genes that play a role in the NF- $\kappa$ B pathway, identified using DAVID Functional  
994 Annotation Analysis and GO-BP terms in post-transplanted CD8 T cells (*TCF-7* cKO compared  
995 to WT). **(G)** Gene set enrichment analysis (GSEA) enrichment plots of Cytokine signaling  
996 pathways, including IL-1, IL-2, IL-4, and IL-7 signaling pathways from WP terms that are  
997 enriched in post-transplanted CD8 T cells from WT mice (versus *TCF-7* cKO). Negative

998 Enrichment Score is an indicator of downregulation, and positive Enrichment Score is an  
999 indicator of upregulation of the genes in the post-transplanted CD8 T cells from *TCF-7* cKo  
1000 mice. DAVID enrichment scores >1.3 are equivalent to a P value<0.05 (**H**) GSEA enrichment  
1001 plots of G2 to M Cell Cycle and Cell Cycle S pathways that are enriched in *TCF-7* cKO mice,  
1002 and Integrin Mediated Cell Adhesion and Apoptosis pathways that are enriched in post-  
1003 transplanted CD8 T cells from WT mice. (**I**) GSEA enrichment plots of JAK-STAT signaling,  
1004 Toll like receptor signaling, T cell receptor signaling, ERK MAPK signaling, signaling by  
1005 Tyrosine kinases, Rankl - Rank mediated NF-kB signaling pathways that are enriched in post-  
1006 transplanted CD8 T cells from WT mice. Again, Negative Enrichment Score is an indicator of  
1007 downregulation, and positive Enrichment Score is an indicator of upregulation of the genes in the  
1008 post-transplanted CD8<sup>+</sup> T cells from *TCF-7* cKo mice. DAVID enrichment scores >1.3 are  
1009 equivalent to a P value<0.05.

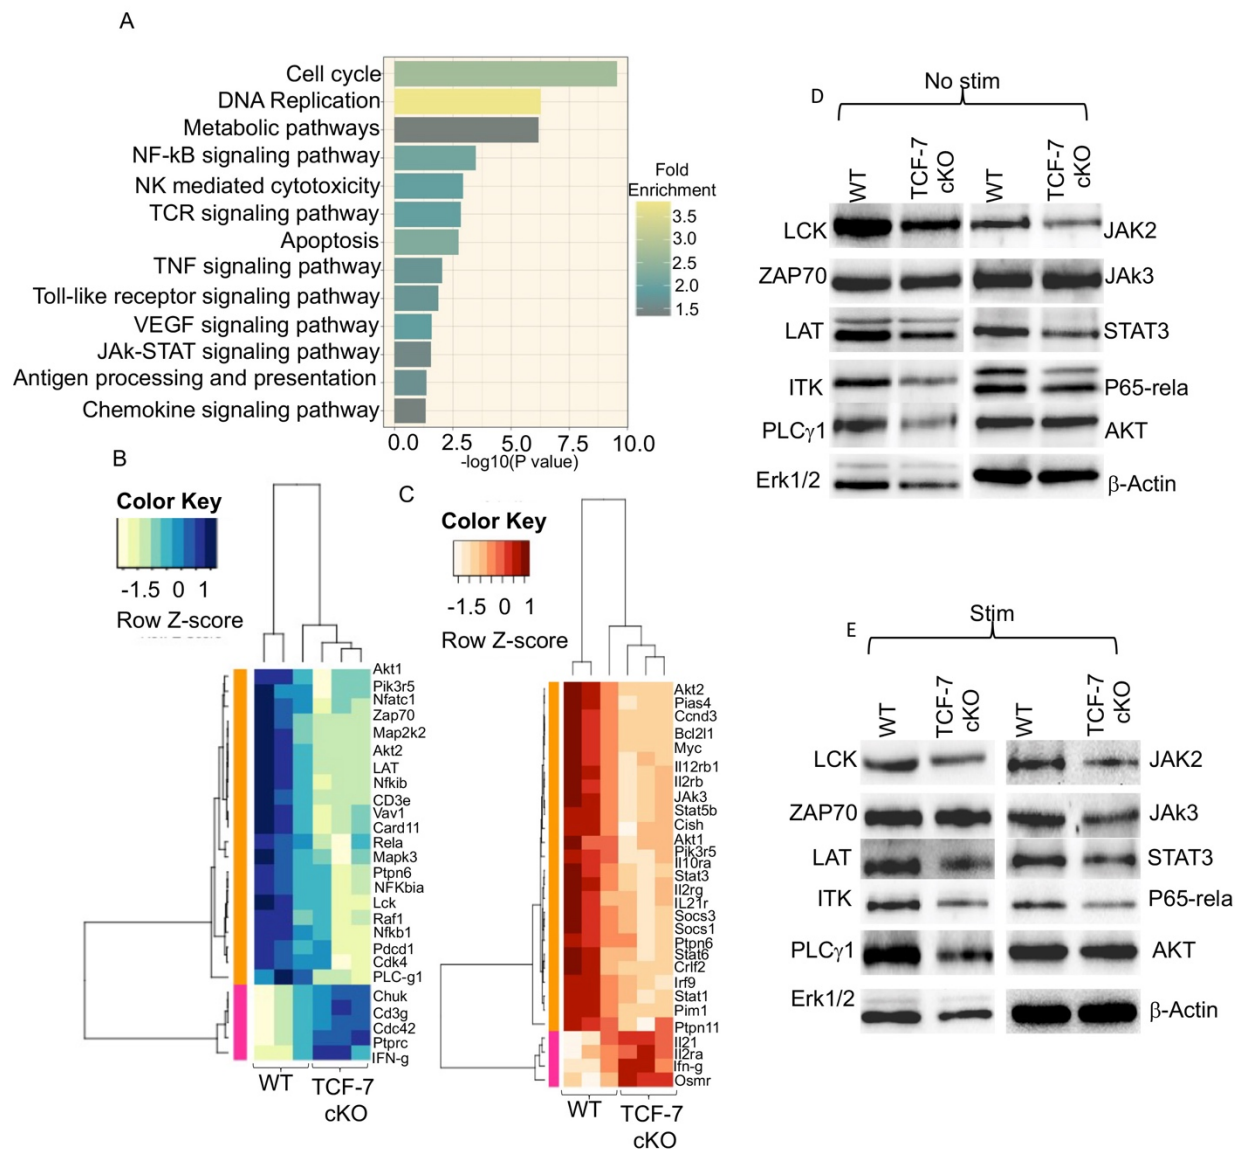

1010

1011 **Fig.7. Loss of *TCF-7* decrease TCR, JAK-STAT, and NF-κB signaling downstream.** (A) A  
 1012 bar plot showing KEGG (Kyoto Encyclopedia of Genes and Genomes) pathways identified by  
 1013 David functional annotation analysis. (B) Heatmap showing the altered genes in TCR signaling  
 1014 pathway from KEGG pathways. (C) Heatmap showing the altered genes in JAK-STAT signaling  
 1015 pathway from KEGG pathways. (D) Western blot showing the protein expression levels of LCK,  
 1016 ZAP70, LAT, ITK, PLCγ1, ERK1/2, JAK2, JAK3, STAT3, P65-RelA, AKT, and β-actin of  
 1017 freshly isolated CD8 T cell lysates from *TCF-7* cKO and WT mice. (E) Western blot showing



1018 the protein expression levels of LCK, ZAP70, LAT, ITK, PLC $\gamma$ 1, ERK1/2, JAK2, JAK3,  
1019 STAT3, P65-RelA, AKT, and  $\beta$ -actin in 10 minute-CD3/CD28-stimulated CD8 T cell lysates  
1020 from *TCF-7* cKO and WT mice. All the western blots repeated at least three and one  
1021 representative of each protein and quantification is shown.  
1022  
1023

1024 **Supplemental Figure Legends:**

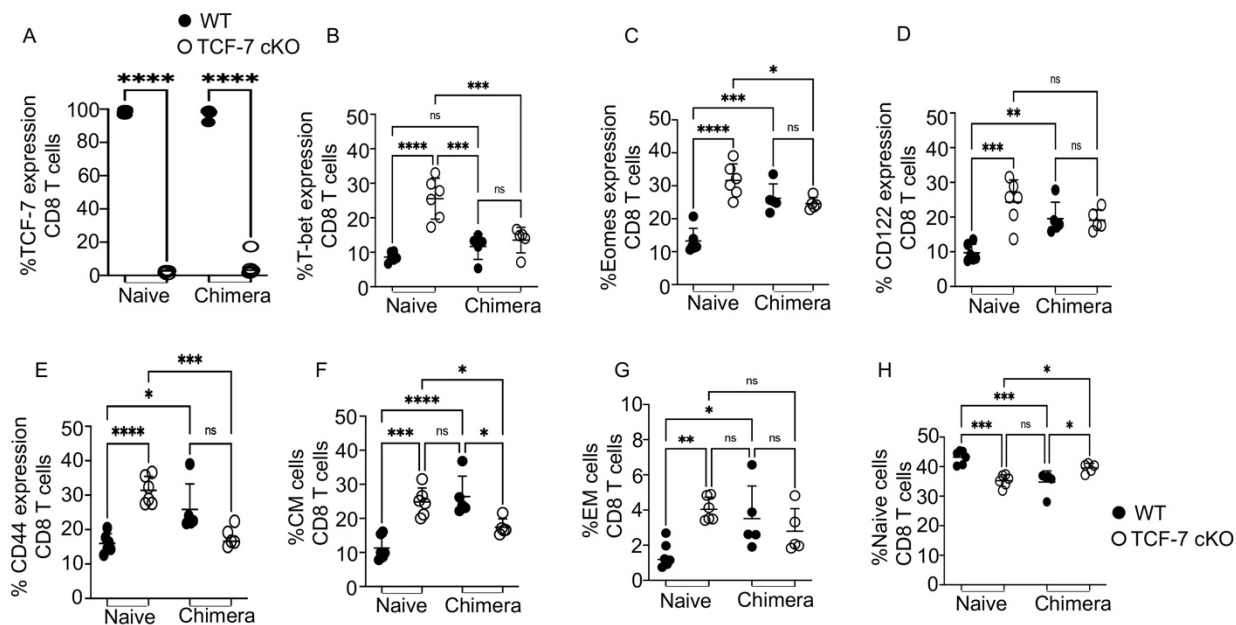

1025

1026 **Supp.Fig.1. Related to Fig2. Loss of *TCF-7* drives changes to mature CD8 T cell phenotype**

1027 **that are cell-intrinsic, with the possibility of extrinsic effects.** Bone marrow chimeras were

1028 developed by lethally irradiating Thy1.1 mice and reconstituting with a 1:4 (WT:*TCF-7* cKO)

1029 mixture of bone marrow cells. Blood was tested at 9 weeks to ensure reconstitution with both

1030 donor cell types, and splenocytes were used at 10 weeks for phenotyping by flow cytometry. **(A)**

1031 Percentage of CD8 T cells from chimeric and naive mice expressing *TCF-7*. **(B)** Percentage of

1032 CD8 T cells from chimeric and naive mice expressing T-bet. **(C)** Percentage of CD8 T cells from

1033 chimeric and naive mice expressing Eomes. **(D)** Percentage of CD8 T cells from chimeric and

1034 naive mice expressing CD122. **(E)** Percentage of CD8 T cells from chimeric and naive mice

1035 expressing CD44. **(F)** Percentage of CD8 T cells from chimeric and naive mice expressing

1036 central memory (CM) phenotype. **(G)** Percentage of CD8 T cells from chimeric and naive mice

1037 expressing effector memory (EM) phenotype. **(H)** Percentage of CD8 T cells from chimeric and

1038 naive mice expressing naïve phenotype. All data are plotted as individual points with mean and

1039 SD, all were analyzed with one-way ANOVA, or Student's t-test (depending on groups). For all  
1040 graphs, \* means p-value  $\leq 0.05$ , \*\*\* means p-value  $\leq 0.001$ , and \*\*\*\* means p-value  $\leq 0.0001$ .  
1041 For naïve cells 3 different experiments combined (N=2-3 per group of mice) and for chimera cell  
1042 (N=5) with one experiment shown (done once).

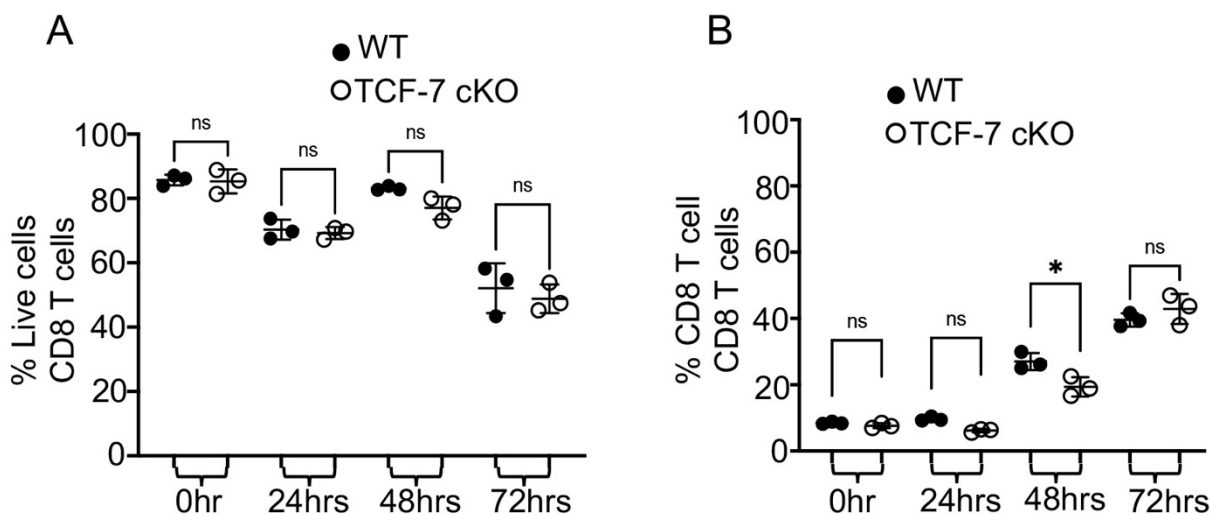

1043

1044 **Supp.Fig.2 Related to Fig.3. Cell viability and CD8 + T cell percent in NKG2D induction *in***

1045 ***vitro***. Total splenocytes were isolated from *TCF-7* cKO or WT mice and either left unstimulated

1046 or stimulated with anti-CD3/CD28 for 24, 48, or 72 hrs in culture. GolgiPlug (1:1000) was added

1047 to stimulated samples for each time point except 0 hr samples, and samples were incubated at 37

1048 C with 7% CO<sub>2</sub>. After 6 hours of culture, the cells were stained for CD3, CD8, NKG2D, and

1049 Granzyme B expression, as determined by flow cytometry. **(A)** Quantification of percent of live

1050 cells (dead cells that were positive for LIVE/DEAD Aqua excluded) for different time points of

1051 stimulation. **(B)** Quantification of CD8 T cell percentages for different time points of

1052 stimulation. N=4 per group with one representative of 2 experiments shown. All data are shown

1053 as individual points with mean and SD, and were analyzed with two-way ANOVA (depending

1054 on groups). \* means p-value  $\leq 0.05$ , \*\* means p-value  $\leq 0.01$ , and \*\*\* means p-value  $\leq 0.001$ .

1055

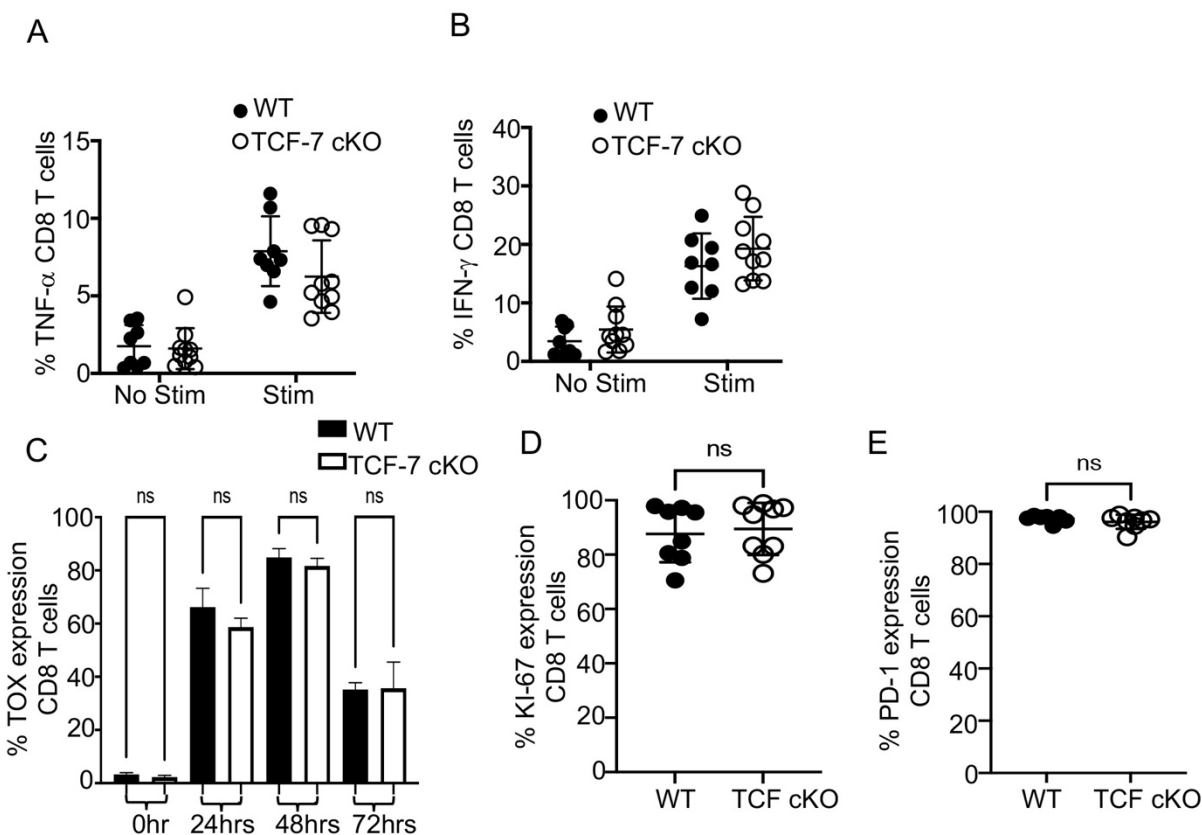

1056

1057 **Supp.Fig3. Related to Fig.5. TCF-7 controls cytokine production and exhaustion of mature**

1058 **alloactivated CD8 T cells. (A-B)** Recipient mice were allotransplanted with  $1.5 \times 10^6$  WT or

1059 *TCF-7* cKO donor CD3 T cells as before. Splenocytes were taken at day 7 post-transplant,

1060 restimulated by 6-hour culture with Golgi Plug and PBS (control) or anti-CD3/anti-CD28 (TCR

1061 restim.), then stained for H2K<sup>b</sup>, CD3, CD4, CD8, TNF- $\alpha$ , and IFN- $\gamma$ . **(A)** TNF- $\alpha$  production and

1062 **(B)** IFN- $\gamma$  production by donor CD8 T cells, as measured by percent cytokine-positive donor

1063 cells. **(C)** Splenocytes from *TCF-7* cKO and WT mice were obtained and either stimulated with

1064 anti-CD3/CD28 antibodies for 24hrs, 48hrs, or 72hrs in culture and stained for TOX, or were

1065 immediately stained after isolation without stimulation. Percent expression of TOX in CD8 T

1066 cells after 72 hours of CD3/CD28 stimulation in culture, as determined by flow cytometry. **(D-E)**

1067 Balb/c mice were allo-transplanted as before, with WT BM and WT or *TCF-7* cKO CD8 donor T  
 1068 cells. On day 7, spleens were removed from recipients, processed to isolate lymphocytes, and  
 1069 lymphocytes were stained for CD3, CD8, H2K<sup>b</sup>, Ki-67, and PD-1 to identify proliferating and  
 1070 exhausted T cells, respectively. **(D)** Quantification of the Ki-67 expression in *in vivo* donor CD8  
 1071 T cells. **(E)** Quantification of the PD-1 expression in *in vivo* donor CD8 T cells. N=3-5 per group  
 1072 for **A-B** and **D-E** with two experiments shown. N=4 per group for **C**, one representative of two  
 1073 experiments shown. All data are shown as individual points with mean and SD, and were  
 1074 analyzed with Student's t-test or two-way ANOVA (depending on groups). \* means p-value  $\leq$   
 1075 0.05, \*\* means p-value  $\leq$  0.01, and \*\*\* means p-value  $\leq$  0.001.

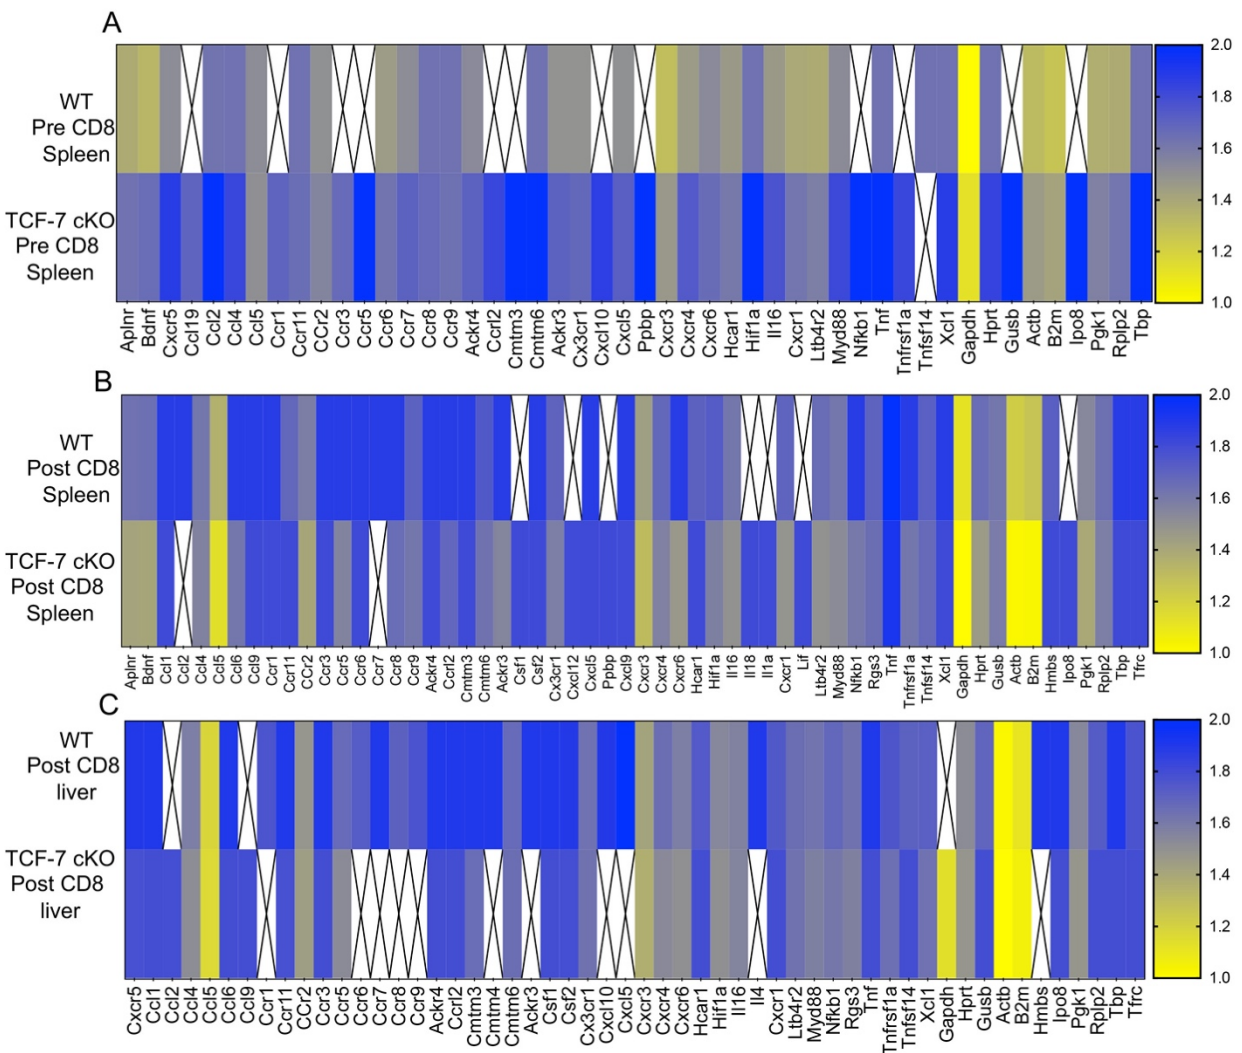

1077 **Supp.Fig.4. *TCF-7* controls chemokine and chemokine receptor expression of donor CD8 T**  
1078 **cells during alloactivation.** As before, BALB/c mice were allotransplanted with BM and  $1 \times 10^6$   
1079 donor CD3 T cells from WT or *TCF-7* cKO mice (not mixed). Donor CD8 T cells were FACS-  
1080 sorted from spleen of donor's pre-transplant, and from spleen and liver of recipients at day 7  
1081 post-transplant. Cells were sorted into Trizol, then RNA was extracted using chloroform and  
1082 converted to cDNA for qPCR analysis. cDNA was run on premade mouse chemokine/chemokine  
1083 receptor assay plates, and results are displayed as heatmaps. Scales are shown at right, with fold  
1084 change per gene compared to an 18S reference gene on each plate. White boxes with an "X"  
1085 represent signals too low to detect or otherwise unreadable due to technical limitation/error. **(A)**  
1086 Pre-transplant spleen donor CD8 T cells, **(B)** post-transplant spleen donor CD8 T cells, and **(C)**  
1087 post-transplant liver donor CD8 T cells for WT versus *TCF-7* cKO donors. N=5 mice into one  
1088 sample per condition, summary data shown.

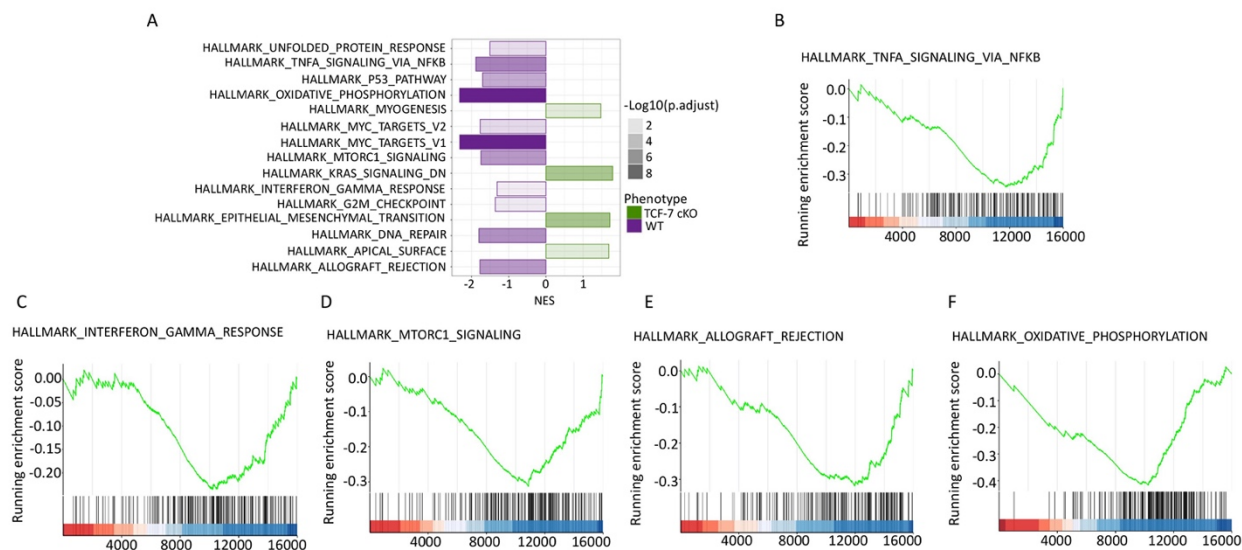

1089

1090 **Supp.Fig.5: Loss of *TCF-7* alters the enrichment of gene sets in pre-transplanted CD8+T**  
1091 **cells. (A)** Bar plot of the altered pathways indentified in Gene set enrichment analysis (GSEA)  
1092 by using Hallmark gene set collections of the Molecular Signatures Database (MSigDB) in pre-

1093 transplanted CD8 T cells (*TCF-7* cKO compared to WT). The normalized enrichment score  
1094 (NES) for the pathway is defined as the peak score furthest from zero, with a negative NES  
1095 meaning enrichment in the WT group. **(B)** GSEA plot for the  
1096 “HALLMARK\_TNFA\_SIGNALING\_VIA\_NFKB” pathway comparing pre-transplanted CD8 T  
1097 cells from *TCF-7* cKO to WT cells. The running enrichment score (ES) for the pathway is  
1098 defined as the peak score furthest from zero, with a negative ES meaning enrichment in the WT  
1099 group. **(C)** GSEA plot for the “HALLMARK\_INTERFERON\_GAMMA\_RESPONSE” pathway  
1100 comparing pre-transplanted CD8 T cells from *TCF-7* cKO to WT cells. **(D)** GSEA plot for the  
1101 “HALLMARK\_MTORC1\_SIGNALING” pathway comparing pre-transplanted CD8 T cells  
1102 from *TCF-7* cKO to WT cells. **(E)** GSEA plot for the  
1103 “HALLMARK\_ALLOGRAFT\_REJECTION” pathway comparing pre-transplanted CD8 T cells  
1104 from *TCF-7* cKO to WT cells. **(F)** GSEA plot for the  
1105 “HALLMARK\_OXIDATIVE\_PHOSPHORYLATION” pathway comparing pre-transplanted  
1106 CD8 T cells from *TCF-7* cKO to WT cells.

Top 20 pathways in GO-BP

| Term ID    | Term                                                                                            | Count | %          | P Value  | Fold Enrichment | FDR        |
|------------|-------------------------------------------------------------------------------------------------|-------|------------|----------|-----------------|------------|
| GO:0007049 | Cell cycle                                                                                      | 141   | 5.73870574 | 2.34E-14 | 1.906511069     | 1.19E-10   |
| GO:0015031 | Protein transport                                                                               | 134   | 5.45380545 | 3.42E-13 | 1.879194277     | 8.74E-10   |
| GO:0098609 | Cell-cell adhesion                                                                              | 55    | 2.23850224 | 6.46E-10 | 2.415958527     | 9.33E-07   |
| GO:0051301 | Cell division                                                                                   | 88    | 3.58160358 | 7.31E-10 | 1.953438125     | 9.33E-07   |
| GO:0007067 | Mitotic nuclear division                                                                        | 69    | 2.80830281 | 5.24E-09 | 2.068035126     | 5.35E-06   |
| GO:0006915 | Apoptotic process                                                                               | 114   | 4.63980464 | 4.40E-08 | 1.660422406     | 3.75E-05   |
| GO:0006810 | Transport                                                                                       | 291   | 11.8437118 | 1.39E-07 | 1.325968496     | 1.01E-04   |
| GO:0006974 | Cellular response to DNA damage stimulus                                                        | 86    | 3.5002035  | 8.53E-07 | 1.699956273     | 5.31E-04   |
| GO:0016192 | Vesicle-mediated transport                                                                      | 52    | 2.11640212 | 9.36E-07 | 2.026806693     | 5.31E-04   |
| GO:0006783 | Heme biosynthetic process                                                                       | 12    | 0.48840049 | 2.25E-06 | 5.243439176     | 0.0011491  |
| GO:0002479 | Antigen processing and presentation of exogenous peptide antigen via MHC class I, TAP-dependent | 15    | 0.61050061 | 2.85E-06 | 4.151056015     | 0.00132461 |
| GO:0050852 | T cell receptor signaling pathway                                                               | 20    | 0.81400081 | 3.32E-06 | 3.255730208     | 0.00141253 |
| GO:0006260 | DNA replication                                                                                 | 34    | 1.38380138 | 5.93E-06 | 2.294892756     | 0.00232917 |
| GO:0002376 | Immune system process                                                                           | 76    | 3.09320309 | 1.26E-05 | 1.647416486     | 0.00460664 |
| GO:0043123 | Positive regulation of I-kappaB kinase/NF-kappaB signaling                                      | 36    | 1.46520147 | 6.87E-05 | 2.005879416     | 0.02338981 |
| GO:0008152 | Metabolic process                                                                               | 84    | 3.41880342 | 1.21E-04 | 1.506214709     | 0.03848315 |
| GO:0031663 | Lipopolysaccharide-mediated signaling pathway                                                   | 13    | 0.52910053 | 1.40E-04 | 3.481530851     | 0.04077673 |
| GO:0006281 | DNA repair                                                                                      | 62    | 2.52340252 | 1.44E-04 | 1.618650773     | 0.04077673 |
| GO:0008643 | Carbohydrate transport                                                                          | 14    | 0.56980057 | 2.33E-04 | 3.141339687     | 0.06257663 |

1107

1108 **Supp.Fig.6. Related to Fig.7.** Top 20 GO-BP terms identified in DAVID functional annotation

1109 analysis of differentially expressed genes in post-transplanted samples. Count mean – number of

1110 genes involved in the Term, % - percentage of involved genes/ total genes in the Term.

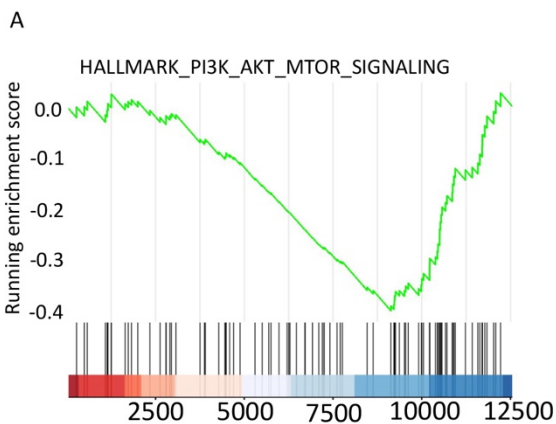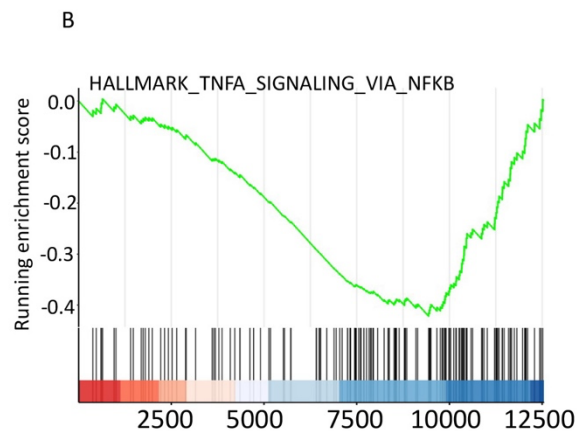

1111



1112 **Supp.Fig.7. Loss of *TCF-7* alters the Gene Set Enrichment Analysis (GSEA) of post-**  
 1113 **transplanted CD8+T cells. (A)** GSEA plot for the  
 1114 “HALLMARK\_PI3K\_AKT\_MTOR\_SIGNALING” pathway comparing post-transplanted CD8  
 1115 T cells from *TCF-7* cKO to WT mice. The running enrichment score (ES) for the pathway is  
 1116 defined as the peak score furthest from zero, with a negative ES meaning enrichment in the WT  
 1117 group. **(B)** GSEA plot for the “HALLMARK\_TNFA\_SIGNALING\_VIA\_NFKB” pathway  
 1118 comparing post-transplanted CD8 T cells from *TCF-7* cKO to WT mice. Again, the running  
 1119 enrichment score (ES) for the pathway is defined as the peak score furthest from zero, with a  
 1120 negative ES meaning enrichment in the WT group.

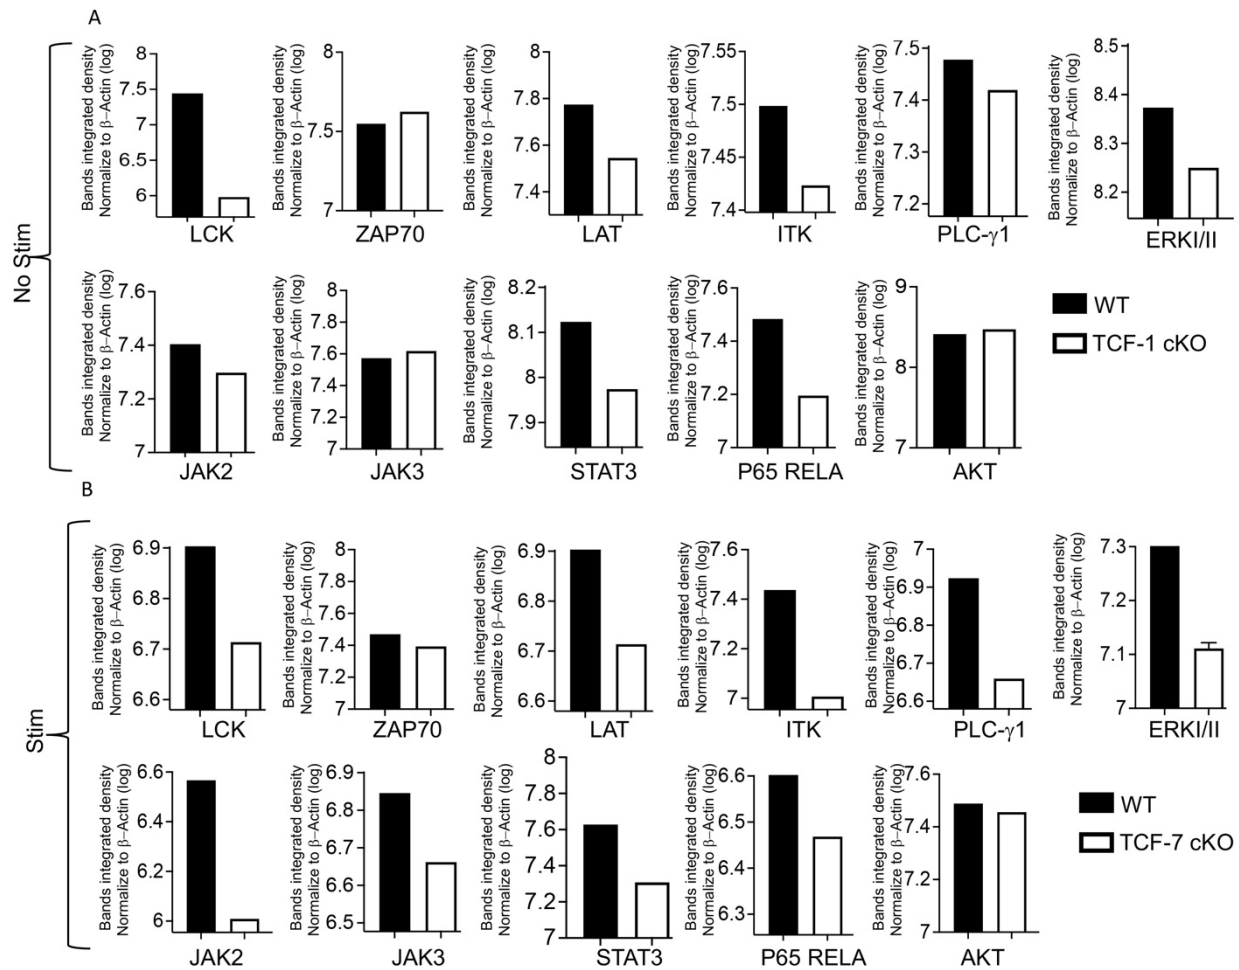

1121

1122 **Supp.Fig.8. Related to Fig.8. Quantification of Western blot of TCR and JAK-STAT**  
1123 **signaling. (A)** Comparison of the quantified bands integrated density normalized to  $\beta$ -actin for  
1124 unstimulated CD8 T cells from *TCF-7* cKO and WT mice. **(B)** Comparison of the quantified  
1125 bands integrated density normalized to  $\beta$ -actin for 10-minute-anti-CD3/CD28-stimulated CD8 T  
1126 cells from *TCF-7* cKO and WT mice. All the western blots repeated at least three times and one  
1127 representative of each protein and quantification is shown.

1128

1129

1130

1131

1132

1133

1134

1135

## 1136 References

- 1137 Abel, A.M., Yang, C., Thakar, M.S., and Malarkannan, S. (2018). Natural Killer Cells:  
1138 Development, Maturation, and Clinical Utilization. *Front Immunol* *9*, 1869.  
1139 10.3389/fimmu.2018.01869.
- 1140 Ahn, E., Araki, K., Hashimoto, M., Li, W., Riley, J.L., Cheung, J., Sharpe, A.H., Freeman, G.J.,  
1141 Irving, B.A., and Ahmed, R. (2018). Role of PD-1 during effector CD8 T cell differentiation. *Proc*  
1142 *Natl Acad Sci U S A* *115*, 4749-4754. 10.1073/pnas.1718217115.
- 1143 Al Dulaimi, D., Klibi, J., Olivo Pimentel, V., Parietti, V., Allez, M., Toubert, A., and Benlagha, K.  
1144 (2018). Critical Contribution of NK Group 2 Member D Expressed on Invariant Natural Killer T  
1145 Cells in Concanavalin A-Induced Liver Hepatitis in Mice. *Front Immunol* *9*, 1052.  
1146 10.3389/fimmu.2018.01052.
- 1147 Balassa, K., Danby, R., and Rocha, V. (2019). Haematopoietic stem cell transplants: principles  
1148 and indications. *Br J Hosp Med (Lond)* *80*, 33-39. 10.12968/hmed.2019.80.1.33.
- 1149 Bastien, J.P., Roy, J., and Roy, D.C. (2012). Selective T-cell depletion for haplotype-mismatched  
1150 allogeneic stem cell transplantation. *Seminars in oncology* *39*, 674-682.  
1151 10.1053/j.seminoncol.2012.09.004.
- 1152 Beilhack, A., Schulz, S., Baker, J., Beilhack, G.F., Wieland, C.B., Herman, E.I., Baker, E.M., Cao,  
1153 Y.A., Contag, C.H., and Negrin, R.S. (2005). In vivo analyses of early events in acute graft-versus-  
1154 host disease reveal sequential infiltration of T-cell subsets. *Blood* *106*, 1113-1122.  
1155 10.1182/blood-2005-02-0509.
- 1156 Beltra, J.C., Manne, S., Abdel-Hakeem, M.S., Kurachi, M., Giles, J.R., Chen, Z., Casella, V., Ngiow,  
1157 S.F., Khan, O., Huang, Y.J., et al. (2020). Developmental Relationships of Four Exhausted CD8(+)  
1158 T Cell Subsets Reveals Underlying Transcriptional and Epigenetic Landscape Control  
1159 Mechanisms. *Immunity* *52*, 825-841 e828. 10.1016/j.immuni.2020.04.014.
- 1160 Berga-Bolanos, R., Zhu, W.S., Steinke, F.C., Xue, H.H., and Sen, J.M. (2015). Cell-autonomous  
1161 requirement for TCF1 and LEF1 in the development of Natural Killer T cells. *Mol Immunol* *68*,  
1162 484-489. 10.1016/j.molimm.2015.09.017.
- 1163 Bleakley, M., Turtle, C.J., and Riddell, S.R. (2012). Augmentation of anti-tumor immunity by  
1164 adoptive T-cell transfer after allogeneic hematopoietic stem cell transplantation. *Expert Rev*  
1165 *Hematol* *5*, 409-425. 10.1586/ehm.12.28.
- 1166 Blessin, N.C., Li, W., Mandelkow, T., Jansen, H.L., Yang, C., Raedler, J.B., Simon, R., Buscheck, F.,  
1167 Dum, D., Luebke, A.M., et al. (2021). Prognostic role of proliferating CD8(+) cytotoxic T cells in  
1168 human cancers. *Cell Oncol (Dordr)* *44*, 793-803. 10.1007/s13402-021-00601-4.
- 1169 Bray, N.L., Pimentel, H., Melsted, P., and Pachter, L. (2016). Near-optimal probabilistic RNA-seq  
1170 quantification. *Nat Biotechnol* *34*, 525-527. 10.1038/nbt.3519.
- 1171 Breems, D.A., and Lowenberg, B. (2005). Autologous stem cell transplantation in the treatment  
1172 of adults with acute myeloid leukaemia. *Br J Haematol* *130*, 825-833. BJH5628 [pii]  
1173 10.1111/j.1365-2141.2005.05628.x.
- 1174 Chen, Z., Ji, Z., Ngiow, S.F., Manne, S., Cai, Z., Huang, A.C., Johnson, J., Staube, R.P., Bengsch, B.,  
1175 Xu, C., et al. (2019). *TCF-1*-Centered Transcriptional Network Drives an Effector versus  
1176 Exhausted CD8 T Cell-Fate Decision. *Immunity* *51*, 840-855 e845.  
1177 10.1016/j.immuni.2019.09.013.
- 1178 Chu, T., Tyznik, A.J., Roepke, S., Berkley, A.M., Woodward-Davis, A., Pattacini, L., Bevan, M.J.,

- 1179 Zehn, D., and Prlic, M. (2013). Bystander-activated memory CD8 T cells control early pathogen  
1180 load in an innate-like, NKG2D-dependent manner. *Cell Rep* 3, 701-708.  
1181 [10.1016/j.celrep.2013.02.020](https://doi.org/10.1016/j.celrep.2013.02.020).
- 1182 Cieri, N., Camisa, B., Cocchiarella, F., Forcato, M., Oliveira, G., Provasi, E., Bondanza, A.,  
1183 Bordignon, C., Peccatori, J., Ciceri, F., et al. (2013). IL-7 and IL-15 instruct the generation of  
1184 human memory stem T cells from naive precursors. *Blood* 121, 573-584. [10.1182/blood-2012-  
1185 05-431718](https://doi.org/10.1182/blood-2012-05-431718).
- 1186 Cooke, K.R., Kobzik, L., Martin, T.R., Brewer, J., Delmonte, J., Jr., Crawford, J.M., and Ferrara, J.L.  
1187 (1996). An experimental model of idiopathic pneumonia syndrome after bone marrow  
1188 transplantation: I. The roles of minor H antigens and endotoxin. *Blood* 88, 3230-3239.
- 1189 Cui, W., Liu, Y., Weinstein, J.S., Craft, J., and Kaech, S.M. (2011). An interleukin-21-interleukin-  
1190 10-STAT3 pathway is critical for functional maturation of memory CD8+ T cells. *Immunity* 35,  
1191 792-805. [10.1016/j.immuni.2011.09.017](https://doi.org/10.1016/j.immuni.2011.09.017).
- 1192 Decman, V., Laidlaw, B.J., Dimenna, L.J., Abdulla, S., Mozdzanowska, K., Erikson, J., Ertl, H.C.,  
1193 and Wherry, E.J. (2010). Cell-intrinsic defects in the proliferative response of antiviral memory  
1194 CD8 T cells in aged mice upon secondary infection. *J Immunol* 184, 5151-5159.  
1195 [10.4049/jimmunol.0902063](https://doi.org/10.4049/jimmunol.0902063).
- 1196 Dutt, S., Baker, J., Kohrt, H.E., Kambham, N., Sanyal, M., Negrin, R.S., and Strober, S. (2011).  
1197 CD8+CD44(hi) but not CD4+CD44(hi) memory T cells mediate potent graft antilymphoma  
1198 activity without GVHD. *Blood* 117, 3230-3239. [10.1182/blood-2010-10-312751](https://doi.org/10.1182/blood-2010-10-312751).
- 1199 Edinger, M., Hoffmann, P., Contag, C.H., and Negrin, R.S. (2003a). Evaluation of effector cell fate  
1200 and function by in vivo bioluminescence imaging. *Methods* 31, 172-179. [10.1016/s1046-  
1201 2023\(03\)00127-0](https://doi.org/10.1016/s1046-2023(03)00127-0).
- 1202 Edinger, M., Hoffmann, P., Ermann, J., Drago, K., Fathman, C.G., Strober, S., and Negrin, R.S.  
1203 (2003b). CD4+CD25+ regulatory T cells preserve graft-versus-tumor activity while inhibiting  
1204 graft-versus-host disease after bone marrow transplantation. *Nat Med* 9, 1144-1150.  
1205 [10.1038/nm915](https://doi.org/10.1038/nm915).
- 1206 Escobar, G., Mangani, D., and Anderson, A.C. (2020). T cell factor 1: A master regulator of the T  
1207 cell response in disease. *Sci Immunol* 5. [10.1126/sciimmunol.abb9726](https://doi.org/10.1126/sciimmunol.abb9726).
- 1208 Ferrara, J.L. (2014). Blood and Marrow Transplant Clinical Trials Network: Progress since the  
1209 State of the Science Symposium 2007. *Biology of blood and marrow transplantation : journal of  
1210 the American Society for Blood and Marrow Transplantation* 20, 149-153.  
1211 [10.1016/j.bbmt.2013.11.006](https://doi.org/10.1016/j.bbmt.2013.11.006).
- 1212 Gattinoni, L., Lugli, E., Ji, Y., Pos, Z., Paulos, C.M., Quigley, M.F., Almeida, J.R., Gostick, E., Yu, Z.,  
1213 Carpenito, C., et al. (2011). A human memory T cell subset with stem cell-like properties. *Nat  
1214 Med* 17, 1290-1297. [10.1038/nm.2446](https://doi.org/10.1038/nm.2446).
- 1215 Gautam, S., Fioravanti, J., Zhu, W., Le Gall, J.B., Brohawn, P., Lacey, N.E., Hu, J., Hocker, J.D.,  
1216 Hawk, N.V., Kapoor, V., et al. (2019). The transcription factor c-Myb regulates CD8(+) T cell  
1217 stemness and antitumor immunity. *Nat Immunol* 20, 337-349. [10.1038/s41590-018-0311-z](https://doi.org/10.1038/s41590-018-0311-z).
- 1218 Germar, K., Dose, M., Konstantinou, T., Zhang, J., Wang, H., Lobry, C., Arnett, K.L., Blacklow,  
1219 S.C., Aifantis, I., Aster, J.C., and Gounari, F. (2011). T-cell factor 1 is a gatekeeper for T-cell  
1220 specification in response to Notch signaling. *Proc Natl Acad Sci U S A* 108, 20060-20065.  
1221 [10.1073/pnas.1110230108](https://doi.org/10.1073/pnas.1110230108).
- 1222 Giralt, S., and Bishop, M.R. (2009). Principles and overview of allogeneic hematopoietic stem

- 1223 cell transplantation. *Cancer Treat Res* 144, 1-21. 10.1007/978-0-387-78580-6\_1.
- 1224 Gounari, F., and Khazaie, K. (2022). TCF-1: a maverick in T cell development and function. *Nat*
- 1225 *Immunol.* 10.1038/s41590-022-01194-2.
- 1226 Guinan, E.C., Boussiotis, V.A., Neuberg, D., Brennan, L.L., Hirano, N., Nadler, L.M., and Gribben,
- 1227 J.G. (1999). Transplantation of anergic histoincompatible bone marrow allografts. *N Engl J Med*
- 1228 340, 1704-1714. 10.1056/NEJM199906033402202.
- 1229 Hall, E., and Shenoy, S. (2019). Hematopoietic Stem Cell Transplantation: A Neonatal
- 1230 Perspective. *Neoreviews* 20, e336-e345. 10.1542/neo.20-6-e336.
- 1231 He, R., Hou, S., Liu, C., Zhang, A., Bai, Q., Han, M., Yang, Y., Wei, G., Shen, T., Yang, X., et al.
- 1232 (2016). Follicular CXCR5- expressing CD8(+) T cells curtail chronic viral infection. *Nature* 537,
- 1233 412-428. 10.1038/nature19317.
- 1234 Hoffmann, P., Ermann, J., Edinger, M., Fathman, C.G., and Strober, S. (2002). Donor-type
- 1235 CD4(+)CD25(+) regulatory T cells suppress lethal acute graft-versus-host disease after allogeneic
- 1236 bone marrow transplantation. *J Exp Med* 196, 389-399. 10.1084/jem.20020399.
- 1237 Hu, J., Batth, I.S., Xia, X., and Li, S. (2016). Regulation of NKG2D(+)CD8(+) T-cell-mediated
- 1238 antitumor immune surveillance: Identification of a novel CD28 activation-mediated, STAT3
- 1239 phosphorylation-dependent mechanism. *Oncoimmunology* 5, e1252012.
- 1240 10.1080/2162402X.2016.1252012.
- 1241 Huang da, W., Sherman, B.T., and Lempicki, R.A. (2009a). Bioinformatics enrichment tools:
- 1242 paths toward the comprehensive functional analysis of large gene lists. *Nucleic Acids Res* 37, 1-
- 1243 13. 10.1093/nar/gkn923.
- 1244 Huang da, W., Sherman, B.T., and Lempicki, R.A. (2009b). Systematic and integrative analysis of
- 1245 large gene lists using DAVID bioinformatics resources. *Nat Protoc* 4, 44-57.
- 1246 10.1038/nprot.2008.211.
- 1247 Huang, W., Hu, J., and August, A. (2013). Cutting edge: innate memory CD8+ T cells are distinct
- 1248 from homeostatic expanded CD8+ T cells and rapidly respond to primary antigenic stimuli. *J*
- 1249 *Immunol* 190, 2490-2494. 10.4049/jimmunol.1202988.
- 1250 Huang, W., Mo, W., Jiang, J., Chao, N.J., and Chen, B.J. (2019). Donor Allospecific CD44(high)
- 1251 Central Memory T Cells Have Decreased Ability to Mediate Graft-vs.-Host Disease. *Front*
- 1252 *Immunol* 10, 624. 10.3389/fimmu.2019.00624.
- 1253 Im, S.J., Hashimoto, M., Gerner, M.Y., Lee, J., Kissick, H.T., Burger, M.C., Shan, Q., Hale, J.S., Lee,
- 1254 J., Nasti, T.H., et al. (2016). Defining CD8+ T cells that provide the proliferative burst after PD-1
- 1255 therapy. *Nature* 537, 417-421. 10.1038/nature19330.
- 1256 Jiang, H., Fu, D., Bidgoli, A., and Paczesny, S. (2021). T Cell Subsets in Graft Versus Host Disease
- 1257 and Graft Versus Tumor. *Front Immunol* 12, 761448. 10.3389/fimmu.2021.761448.
- 1258 Jiang, T., Piao, D., Zhu, A., and Jiang, H. (2014). Changes in T lymphocyte subsets in mice with
- 1259 CT26 colon tumors after treatment with donor lymphocyte infusion. *Tumour Biol* 35, 5599-
- 1260 5605. 10.1007/s13277-014-1740-4.
- 1261 Johnson, J.L., Georgakilas, G., Petrovic, J., Kurachi, M., Cai, S., Harly, C., Pear, W.S., Bhandoola,
- 1262 A., Wherry, E.J., and Vahedi, G. (2018). Lineage-Determining Transcription Factor TCF-1 Initiates
- 1263 the Epigenetic Identity of T Cells. *Immunity* 48, 243-257 e210. 10.1016/j.immuni.2018.01.012.
- 1264 Ju, X.P., Xu, B., Xiao, Z.P., Li, J.Y., Chen, L., Lu, S.Q., and Huang, Z.X. (2005). Cytokine expression
- 1265 during acute graft-versus-host disease after allogeneic peripheral stem cell transplantation.
- 1266 *Bone Marrow Transplant* 35, 1179-1186. 10.1038/sj.bmt.1704972.

- 1267 Karimi, M.A., Bryson, J.L., Richman, L.P., Fesnak, A.D., Leichner, T.M., Satake, A., Vonderheide,  
1268 R.H., Raulet, D.H., Reshef, R., and Kambayashi, T. (2015). NKG2D expression by CD8+ T cells  
1269 contributes to GVHD and GVT effects in a murine model of allogeneic HSCT. *Blood* *125*, 3655-  
1270 3663. 10.1182/blood-2015-02-629006.
- 1271 Karimi, M.A., Lee, E., Bachmann, M.H., Salicioni, A.M., Behrens, E.M., Kambayashi, T., and  
1272 Baldwin, C.L. (2014). Measuring cytotoxicity by bioluminescence imaging outperforms the  
1273 standard chromium-51 release assay. *PLoS One* *9*, e89357. 10.1371/journal.pone.0089357.
- 1274 Khan, O., Giles, J.R., McDonald, S., Manne, S., Ngiow, S.F., Patel, K.P., Werner, M.T., Huang, A.C.,  
1275 Alexander, K.A., Wu, J.E., et al. (2019). TOX transcriptionally and epigenetically programs CD8(+)  
1276 T cell exhaustion. *Nature* *571*, 211-218. 10.1038/s41586-019-1325-x.
- 1277 Kiekens, L., Van Looche, W., Taveirne, S., Wahlen, S., Persyn, E., Van Ammel, E., De Vos, Z.,  
1278 Matthys, P., Van Nieuwerburgh, F., Taghon, T., et al. (2021). T-BET and EOMES Accelerate and  
1279 Enhance Functional Differentiation of Human Natural Killer Cells. *Front Immunol* *12*, 732511.  
1280 10.3389/fimmu.2021.732511.
- 1281 Kim, C., Jin, J., Weyand, C.M., and Goronzy, J.J. (2020). The Transcription Factor TCF1 in T Cell  
1282 Differentiation and Aging. *Int J Mol Sci* *21*. 10.3390/ijms21186497.
- 1283 Kurtulus, S., Madi, A., Escobar, G., Klapholz, M., Nyman, J., Christian, E., Pawlak, M., Dionne, D.,  
1284 Xia, J., Rozenblatt-Rosen, O., et al. (2019). Checkpoint Blockade Immunotherapy Induces  
1285 Dynamic Changes in PD-1(-)CD8(+) Tumor-Infiltrating T Cells. *Immunity* *50*, 181-194 e186.  
1286 10.1016/j.immuni.2018.11.014.
- 1287 LaFleur, M.W., Nguyen, T.H., Coxe, M.A., Miller, B.C., Yates, K.B., Gillis, J.E., Sen, D.R., Gaudiano,  
1288 E.F., Al Aboosy, R., Freeman, G.J., et al. (2019). PTPN2 regulates the generation of exhausted  
1289 CD8(+) T cell subpopulations and restrains tumor immunity. *Nat Immunol* *20*, 1335-1347.  
1290 10.1038/s41590-019-0480-4.
- 1291 Larson, J.H., Marron, B.M., Beever, J.E., Roe, B.A., and Lewin, H.A. (2006). Genomic organization  
1292 and evolution of the ULBP genes in cattle. *BMC Genomics* *7*, 227. 10.1186/1471-2164-7-227.
- 1293 Law, C.W., Chen, Y., Shi, W., and Smyth, G.K. (2014). voom: Precision weights unlock linear  
1294 model analysis tools for RNA-seq read counts. *Genome Biol* *15*, R29. 10.1186/gb-2014-15-2-r29.
- 1295 Liu, L., Chen, X., Jin, H.M., Zhao, S.S., Zhu, Y., Qian, S.X., and Wu, Y.J. (2022). [The Expression and  
1296 Function of NK Cells in Patients with Acute Myeloid Leukemia]. *Zhongguo Shi Yan Xue Ye Xue Za*  
1297 *Zhi* *30*, 49-55. 10.19746/j.cnki.issn.1009-2137.2022.01.009.
- 1298 Lugli, E., Dominguez, M.H., Gattinoni, L., Chattopadhyay, P.K., Bolton, D.L., Song, K., Klatt, N.R.,  
1299 Brenchley, J.M., Vaccari, M., Gostick, E., et al. (2013). Superior T memory stem cell persistence  
1300 supports long-lived T cell memory. *J Clin Invest* *123*, 594-599. 10.1172/JCI66327.
- 1301 Lynch Kelly, D., Lyon, D.E., Ameringer, S.A., and Elswick, R.K. (2015). Symptoms, Cytokines, and  
1302 Quality of Life in Patients Diagnosed with Chronic Graft-Versus-Host Disease Following  
1303 Allogeneic Hematopoietic Stem Cell Transplantation. *Oncol Nurs Forum* *42*, 265-275.  
1304 10.1188/15.ONF.265-275.
- 1305 Ma, J., Wang, R., Fang, X., and Sun, Z. (2012). beta-catenin/TCF-1 pathway in T cell development  
1306 and differentiation. *J Neuroimmune Pharmacol* *7*, 750-762. 10.1007/s11481-012-9367-y.
- 1307 Maasho, K., Opoku-Anane, J., Marusina, A.I., Coligan, J.E., and Borrego, F. (2005). NKG2D is a  
1308 costimulatory receptor for human naive CD8+ T cells. *J Immunol* *174*, 4480-4484.  
1309 10.4049/jimmunol.174.8.4480.
- 1310 Mammadli, M., Harris, R., Mahmudlu, S., Verma, A., May, A., Dhawan, R., Waickman, A.T., Sen,

- 1311 J.M., August, A., and Karimi, M. (2021a). Human Wnt/beta-Catenin Regulates Alloimmune  
1312 Signaling during Allogeneic Transplantation. *Cancers (Basel)* *13*. 10.3390/cancers13153798.
- 1313 Mammadli, M., Harris, R., Mahmudlu, S., Verma, A., May, A., Dhawan, R., Waickman, A.T., Sen,  
1314 J.M., and Karimi, M. (2021b). Wnt/ $\beta$ -catenin regulates alloreactive T cells for the treatment of  
1315 hematological malignancies. *bioRxiv*, 2021.2004.2012.439538. 10.1101/2021.04.12.439538.
- 1316 Mammadli, M., Harris, R., Suo, L., May, A., Gentile, T., Waickman, A.T., Bah, A., August, A.,  
1317 Nurmammedov, E., and Karimi, M. (2021c). Interleukin-2-inducible T-cell kinase (Itk) signaling  
1318 regulates potent noncanonical regulatory T cells. *Clin Transl Med* *11*, e625. 10.1002/ctm2.625.
- 1319 Mammadli, M., Huang, W., Harris, R., Sultana, A., Cheng, Y., Tong, W., Pu, J., Gentile, T., Dsouza,  
1320 S., Yang, Q., et al. (2020). Targeting Interleukin-2-Inducible T-Cell Kinase (ITK) Differentiates GVL  
1321 and GVHD in Allo-HSCT. *Front Immunol* *11*, 593863. 10.3389/fimmu.2020.593863.
- 1322 Mammadli, M., Huang, W., Harris, R., Xiong, H., Weeks, S., May, A., Gentile, T., Henty-Ridilla, J.,  
1323 Waickman, A.T., August, A., et al. (2021d). Targeting SLP76:ITK interaction separates GVHD  
1324 from GVL in allo-HSCT. *iScience* *24*, 102286. <https://doi.org/10.1016/j.isci.2021.102286>.
- 1325 Mavers, M., and Bertaina, A. (2018). High-Risk Leukemia: Past, Present, and Future Role of NK  
1326 Cells. *J Immunol Res* *2018*, 1586905. 10.1155/2018/1586905.
- 1327 Miller, B.C., Sen, D.R., Al Aboosy, R., Bi, K., Virkud, Y.V., LaFleur, M.W., Yates, K.B., Lako, A., Felt,  
1328 K., Naik, G.S., et al. (2019). Author Correction: Subsets of exhausted CD8(+) T cells differentially  
1329 mediate tumor control and respond to checkpoint blockade. *Nat Immunol* *20*, 1556.  
1330 10.1038/s41590-019-0528-5.
- 1331 Mohty, M., Blaise, D., Faucher, C., Vey, N., Bouabdallah, R., Stoppa, A.M., Viret, F., Gravis, G.,  
1332 Olive, D., and Gaugler, B. (2005). Inflammatory cytokines and acute graft-versus-host disease  
1333 after reduced-intensity conditioning allogeneic stem cell transplantation. *Blood* *106*, 4407-  
1334 4411. 10.1182/blood-2005-07-2919.
- 1335 Nakajima, Y., Chamoto, K., Oura, T., and Honjo, T. (2021). Critical role of the  
1336 CD44(low)CD62L(low) CD8(+) T cell subset in restoring antitumor immunity in aged mice. *Proc*  
1337 *Natl Acad Sci U S A* *118*. 10.1073/pnas.2103730118.
- 1338 Nishimura, R., Baker, J., Beilhack, A., Zeiser, R., Olson, J.A., Segal, E.I., Karimi, M., and Negrin,  
1339 R.S. (2008). In vivo trafficking and survival of cytokine-induced killer cells resulting in minimal  
1340 GVHD with retention of antitumor activity. *Blood* *112*, 2563-2574. 10.1182/blood-2007-06-  
1341 092817.
- 1342 Paley, M.A., and Wherry, E.J. (2010). TCF-1 flips the switch on Eomes. *Immunity* *33*, 145-147.  
1343 10.1016/j.immuni.2010.08.008.
- 1344 Philip, M., Fairchild, L., Sun, L., Horste, E.L., Camara, S., Shakiba, M., Scott, A.C., Viale, A., Lauer,  
1345 P., Merghoub, T., et al. (2017). Chromatin states define tumour-specific T cell dysfunction and  
1346 reprogramming. *Nature* *545*, 452-456. 10.1038/nature22367.
- 1347 Prajapati, K., Perez, C., Rojas, L.B.P., Burke, B., and Guevara-Patino, J.A. (2018). Functions of  
1348 NKG2D in CD8(+) T cells: an opportunity for immunotherapy. *Cell Mol Immunol* *15*, 470-479.  
1349 10.1038/cmi.2017.161.
- 1350 Presotto, D., Erdes, E., Duong, M.N., Allard, M., Regamey, P.O., Quadroni, M., Doucey, M.A.,  
1351 Rufer, N., and Hebeisen, M. (2017). Fine-Tuning of Optimal TCR Signaling in Tumor-Redirected  
1352 CD8 T Cells by Distinct TCR Affinity-Mediated Mechanisms. *Front Immunol* *8*, 1564.  
1353 10.3389/fimmu.2017.01564.
- 1354 Raulet, D.H. (2003). Roles of the NKG2D immunoreceptor and its ligands. *Nat Rev Immunol* *3*,

- 1355 781-790. 10.1038/nri1199.
- 1356 Raulet, D.H., Gasser, S., Gowen, B.G., Deng, W., and Jung, H. (2013). Regulation of ligands for  
1357 the NKG2D activating receptor. *Annu Rev Immunol* 31, 413-441. 10.1146/annurev-immunol-  
1358 032712-095951.
- 1359 Reddy, P., and Ferrara, J.L.M. (2008). Mouse models of graft-versus-host disease. In *StemBook*.  
1360 10.3824/stembook.1.36.1.
- 1361 Ritchie, M.E., Phipson, B., Wu, D., Hu, Y., Law, C.W., Shi, W., and Smyth, G.K. (2015). limma  
1362 powers differential expression analyses for RNA-sequencing and microarray studies. *Nucleic  
1363 Acids Res* 43, e47. 10.1093/nar/gkv007.
- 1364 Schietinger, A., Philip, M., Krisnawan, V.E., Chiu, E.Y., Delrow, J.J., Basom, R.S., Lauer, P.,  
1365 Brockstedt, D.G., Knoblaugh, S.E., Hammerling, G.J., et al. (2016). Tumor-Specific T Cell  
1366 Dysfunction Is a Dynamic Antigen-Driven Differentiation Program Initiated Early during  
1367 Tumorigenesis. *Immunity* 45, 389-401. 10.1016/j.immuni.2016.07.011.
- 1368 Scott, A.C., Dundar, F., Zumbo, P., Chandran, S.S., Klebanoff, C.A., Shakiba, M., Trivedi, P.,  
1369 Menocal, L., Appleby, H., Camara, S., et al. (2019). TOX is a critical regulator of tumour-specific T  
1370 cell differentiation. *Nature* 571, 270-274. 10.1038/s41586-019-1324-y.
- 1371 Seif, F., Khoshmirsafa, M., Aazami, H., Mohsenzadegan, M., Sedighi, G., and Bahar, M. (2017).  
1372 The role of JAK-STAT signaling pathway and its regulators in the fate of T helper cells. *Cell  
1373 Commun Signal* 15, 23. 10.1186/s12964-017-0177-y.
- 1374 Seo, H., Chen, J., Gonzalez-Avalos, E., Samaniego-Castruita, D., Das, A., Wang, Y.H., Lopez-  
1375 Moyado, I.F., Georges, R.O., Zhang, W., Onodera, A., et al. (2019). TOX and TOX2 transcription  
1376 factors cooperate with NR4A transcription factors to impose CD8(+) T cell exhaustion. *Proc Natl  
1377 Acad Sci U S A* 116, 12410-12415. 10.1073/pnas.1905675116.
- 1378 Shi, J., Chi, S., Xue, J., Yang, J., Li, F., and Liu, X. (2016). Emerging Role and Therapeutic  
1379 Implication of Wnt Signaling Pathways in Autoimmune Diseases. *J Immunol Res* 2016, 9392132.  
1380 10.1155/2016/9392132.
- 1381 Siddiqui, I., Schaeuble, K., Chennupati, V., Fuertes Marraco, S.A., Calderon-Copete, S., Pais  
1382 Ferreira, D., Carmona, S.J., Scarpellino, L., Gfeller, D., Pradervand, S., et al. (2019). Intratumoral  
1383 Tcf1(+)PD-1(+)CD8(+) T Cells with Stem-like Properties Promote Tumor Control in Response to  
1384 Vaccination and Checkpoint Blockade Immunotherapy. *Immunity* 50, 195-211 e110.  
1385 10.1016/j.immuni.2018.12.021.
- 1386 Sobocki, M., Mrouj, K., Camasses, A., Parisi, N., Nicolas, E., Lleres, D., Gerbe, F., Prieto, S.,  
1387 Krasinska, L., David, A., et al. (2016). The cell proliferation antigen Ki-67 organises  
1388 heterochromatin. *Elife* 5, e13722. 10.7554/eLife.13722.
- 1389 Steinke, F.C., Yu, S., Zhou, X., He, B., Yang, W., Zhou, B., Kawamoto, H., Zhu, J., Tan, K., and Xue,  
1390 H.H. (2014). TCF-1 and LEF-1 act upstream of Th-POK to promote the CD4(+) T cell fate and  
1391 interact with Runx3 to silence Cd4 in CD8(+) T cells. *Nat Immunol* 15, 646-656. 10.1038/ni.2897.
- 1392 Stojanovic, A., Correia, M.P., and Cerwenka, A. (2018). The NKG2D/NKG2DL Axis in the Crosstalk  
1393 Between Lymphoid and Myeloid Cells in Health and Disease. *Front Immunol* 9, 827.  
1394 10.3389/fimmu.2018.00827.
- 1395 Tugues, S., Amorim, A., Spath, S., Martin-Blondel, G., Schreiner, B., De Feo, D., Lutz, M.,  
1396 Guscetti, F., Apostolova, P., Haftmann, C., et al. (2018). Graft-versus-host disease, but not graft-  
1397 versus-leukemia immunity, is mediated by GM-CSF-licensed myeloid cells. *Sci Transl Med* 10.  
1398 10.1126/scitranslmed.aat8410.



- 1399 Utzschneider, D.T., Charmoy, M., Chennupati, V., Pousse, L., Ferreira, D.P., Calderon-Copete, S.,  
1400 Danilo, M., Alfei, F., Hofmann, M., Wieland, D., et al. (2016). T Cell Factor 1-Expressing Memory-  
1401 like CD8(+) T Cells Sustain the Immune Response to Chronic Viral Infections. *Immunity* 45, 415-  
1402 427. 10.1016/j.immuni.2016.07.021.
- 1403 Utzschneider, D.T., Legat, A., Fuertes Marraco, S.A., Carrie, L., Luescher, I., Speiser, D.E., and  
1404 Zehn, D. (2013). T cells maintain an exhausted phenotype after antigen withdrawal and  
1405 population reexpansion. *Nat Immunol* 14, 603-610. 10.1038/ni.2606.
- 1406 Villarroel, V.A., Okiyama, N., Tsuji, G., Linton, J.T., and Katz, S.I. (2014). CXCR3-mediated skin  
1407 homing of autoreactive CD8 T cells is a key determinant in murine graft-versus-host disease. *J*  
1408 *Invest Dermatol* 134, 1552-1560. 10.1038/jid.2014.2.
- 1409 Wang, S., Wu, Q., Chen, T., Su, R., Pan, C., Qian, J., Huang, H., Yin, S., Xie, H., Zhou, L., and  
1410 Zheng, S. (2022). Blocking CD47 promotes anti-tumor immunity through CD103+ dendritic cell-  
1411 NK cell axis in murine hepatocellular carcinoma model. *J Hepatol*. 10.1016/j.jhep.2022.03.011.
- 1412 Wang, X., He, Q., Shen, H., Xia, A., Tian, W., Yu, W., and Sun, B. (2019a). TOX promotes the  
1413 exhaustion of antitumor CD8(+) T cells by preventing PD1 degradation in hepatocellular  
1414 carcinoma. *J Hepatol* 71, 731-741. 10.1016/j.jhep.2019.05.015.
- 1415 Wang, Y., Hu, J., Li, Y., Xiao, M., Wang, H., Tian, Q., Li, Z., Tang, J., Hu, L., Tan, Y., et al. (2019b).  
1416 The Transcription Factor TCF1 Preserves the Effector Function of Exhausted CD8 T Cells During  
1417 Chronic Viral Infection. *Front Immunol* 10, 169. 10.3389/fimmu.2019.00169.
- 1418 Weber, B.N., Chi, A.W., Chavez, A., Yashiro-Ohtani, Y., Yang, Q., Shestova, O., and Bhandoola, A.  
1419 (2011). A critical role for TCF-1 in T-lineage specification and differentiation. *Nature* 476, 63-68.  
1420 10.1038/nature10279.
- 1421 Weeks, S., Harris, R., and Karimi, M. (2021). Targeting ITK signaling for T cell-mediated diseases.  
1422 *iScience* 24, 102842. 10.1016/j.isci.2021.102842.
- 1423 Wensveen, F.M., Jelencic, V., and Polic, B. (2018). NKG2D: A Master Regulator of Immune Cell  
1424 Responsiveness. *Front Immunol* 9, 441. 10.3389/fimmu.2018.00441.
- 1425 Wu, T., Ji, Y., Moseman, E.A., Xu, H.C., Manglani, M., Kirby, M., Anderson, S.M., Handon, R.,  
1426 Kenyon, E., Elkahloun, A., et al. (2016). The TCF1-Bcl6 axis counteracts type I interferon to  
1427 repress exhaustion and maintain T cell stemness. *Sci Immunol* 1. 10.1126/sciimmunol.aai8593.
- 1428 Xing, S., Li, F., Zeng, Z., Zhao, Y., Yu, S., Shan, Q., Li, Y., Phillips, F.C., Maina, P.K., Qi, H.H., et al.  
1429 (2016). Tcf1 and Lef1 transcription factors establish CD8(+) T cell identity through intrinsic  
1430 HDAC activity. *Nat Immunol* 17, 695-703. 10.1038/ni.3456.
- 1431 Xu, W., Zhao, X., Wang, X., Feng, H., Gou, M., Jin, W., Wang, X., Liu, X., and Dong, C. (2019). The  
1432 Transcription Factor Tox2 Drives T Follicular Helper Cell Development via Regulating Chromatin  
1433 Accessibility. *Immunity* 51, 826-839 e825. 10.1016/j.immuni.2019.10.006.
- 1434 Yang, B.H., Wang, K., Wan, S., Liang, Y., Yuan, X., Dong, Y., Cho, S., Xu, W., Jepsen, K., Feng, G.S.,  
1435 et al. (2019). TCF1 and LEF1 Control Treg Competitive Survival and Tfr Development to Prevent  
1436 Autoimmune Diseases. *Cell Rep* 27, 3629-3645 e3626. 10.1016/j.celrep.2019.05.061.
- 1437 Yu, Q., Sharma, A., and Sen, J.M. (2010). TCF1 and beta-catenin regulate T cell development and  
1438 function. *Immunol Res* 47, 45-55. 10.1007/s12026-009-8137-2.
- 1439 Zander, R., Schauder, D., Xin, G., Nguyen, C., Wu, X., Zajac, A., and Cui, W. (2019). CD4(+) T Cell  
1440 Help Is Required for the Formation of a Cytolytic CD8(+) T Cell Subset that Protects against  
1441 Chronic Infection and Cancer. *Immunity* 51, 1028-1042 e1024. 10.1016/j.immuni.2019.10.009.
- 1442 Zheng, H., Matte-Martone, C., Jain, D., McNiff, J., and Shlomchik, W.D. (2009). Central memory

- 1443 CD8+ T cells induce graft-versus-host disease and mediate graft-versus-leukemia. *J Immunol*  
1444 *182*, 5938-5948. 10.4049/jimmunol.0802212.
- 1445 Zhou, X., Yu, S., Zhao, D.M., Harty, J.T., Badovinac, V.P., and Xue, H.H. (2010). Differentiation  
1446 and persistence of memory CD8(+) T cells depend on T cell factor 1. *Immunity* *33*, 229-240.  
1447 10.1016/j.immuni.2010.08.002.
- 1448 Zhu, Y., Ju, S., Chen, E., Dai, S., Li, C., Morel, P., Liu, L., Zhang, X., and Lu, B. (2010). T-bet and  
1449 eomesodermin are required for T cell-mediated antitumor immune responses. *J Immunol* *185*,  
1450 3174-3183. 10.4049/jimmunol.1000749.
- 1451 Zuniga-Pflucker, J.C. (2004). T-cell development made simple. *Nat Rev Immunol* *4*, 67-72.  
1452 10.1038/nri1257.
- 1453
- 1454
- 1455 Huang da, W., Sherman, B.T., and Lempicki, R.A. (2009). Systematic and integrative analysis of  
1456 large gene lists using DAVID bioinformatics resources. *Nat Protoc* *4*, 44-57.  
1457 10.1038/nprot.2008.211.
- 1458 Karimi, M.A., Aguilar, O., Zou, B., Bachmann, M.H., Carlyle, J.R., Baldwin, C.L., and Kambayashi,  
1459 T. (2014a). A truncated human NKG2D splice isoform negatively regulates NKG2D-mediated  
1460 function. *J Immunol* *193*, 2764-2771. 10.4049/jimmunol.1400920.
- 1461 Karimi, M.A., Bryson, J.L., Richman, L.P., Fesnak, A.D., Lechner, T.M., Satake, A., Vonderheide,  
1462 R.H., Raulet, D.H., Reshef, R., and Kambayashi, T. (2015). NKG2D expression by CD8+ T cells  
1463 contributes to GVHD and GVT effects in a murine model of allogeneic HSCT. *Blood* *125*, 3655-  
1464 3663. 10.1182/blood-2015-02-629006.
- 1465 Karimi, M.A., Lee, E., Bachmann, M.H., Salicioni, A.M., Behrens, E.M., Kambayashi, T., and  
1466 Baldwin, C.L. (2014b). Measuring cytotoxicity by bioluminescence imaging outperforms the  
1467 standard chromium-51 release assay. *PLoS One* *9*, e89357. 10.1371/journal.pone.0089357.
- 1468 Mammadli, M., Harris, R., Mahmudlu, S., Verma, A., May, A., Dhawan, R., Waickman, A.T., Sen,  
1469 J.M., August, A., and Karimi, M. (2021a). Human Wnt/beta-Catenin Regulates Alloimmune  
1470 Signaling during Allogeneic Transplantation. *Cancers (Basel)* *13*. 10.3390/cancers13153798.
- 1471 Mammadli, M., Harris, R., Suo, L., May, A., Gentile, T., Waickman, A.T., Bah, A., August, A.,  
1472 Nurmemmedov, E., and Karimi, M. (2021b). Interleukin-2-inducible T-cell kinase (Itk) signaling  
1473 regulates potent noncanonical regulatory T cells. *Clin Transl Med* *11*, e625. 10.1002/ctm2.625.
- 1474 Mammadli, M., Huang, W., Harris, R., Sultana, A., Cheng, Y., Tong, W., Pu, J., Gentile, T., Dsouza,  
1475 S., Yang, Q., et al. (2020). Targeting Interleukin-2-Inducible T-Cell Kinase (ITK) Differentiates GVL  
1476 and GVHD in Allo-HSCT. *Front Immunol* *11*, 593863. 10.3389/fimmu.2020.593863.
- 1477 Mammadli, M., Huang, W., Harris, R., Xiong, H., Weeks, S., May, A., Gentile, T., Henty-Ridilla, J.,  
1478 Waickman, A.T., August, A., et al. (2021c). Targeting SLP76:ITK interaction separates GVHD from  
1479 GVL in allo-HSCT. *iScience* *24*, 102286. <https://doi.org/10.1016/j.isci.2021.102286>.
- 1480 Sherman, B.T., Hao, M., Qiu, J., Jiao, X., Baseler, M.W., Lane, H.C., Imamichi, T., and Chang, W.  
1481 (2022). DAVID: a web server for functional enrichment analysis and functional annotation of  
1482 gene lists (2021 update). *Nucleic Acids Res.* 10.1093/nar/gkac194.

1483

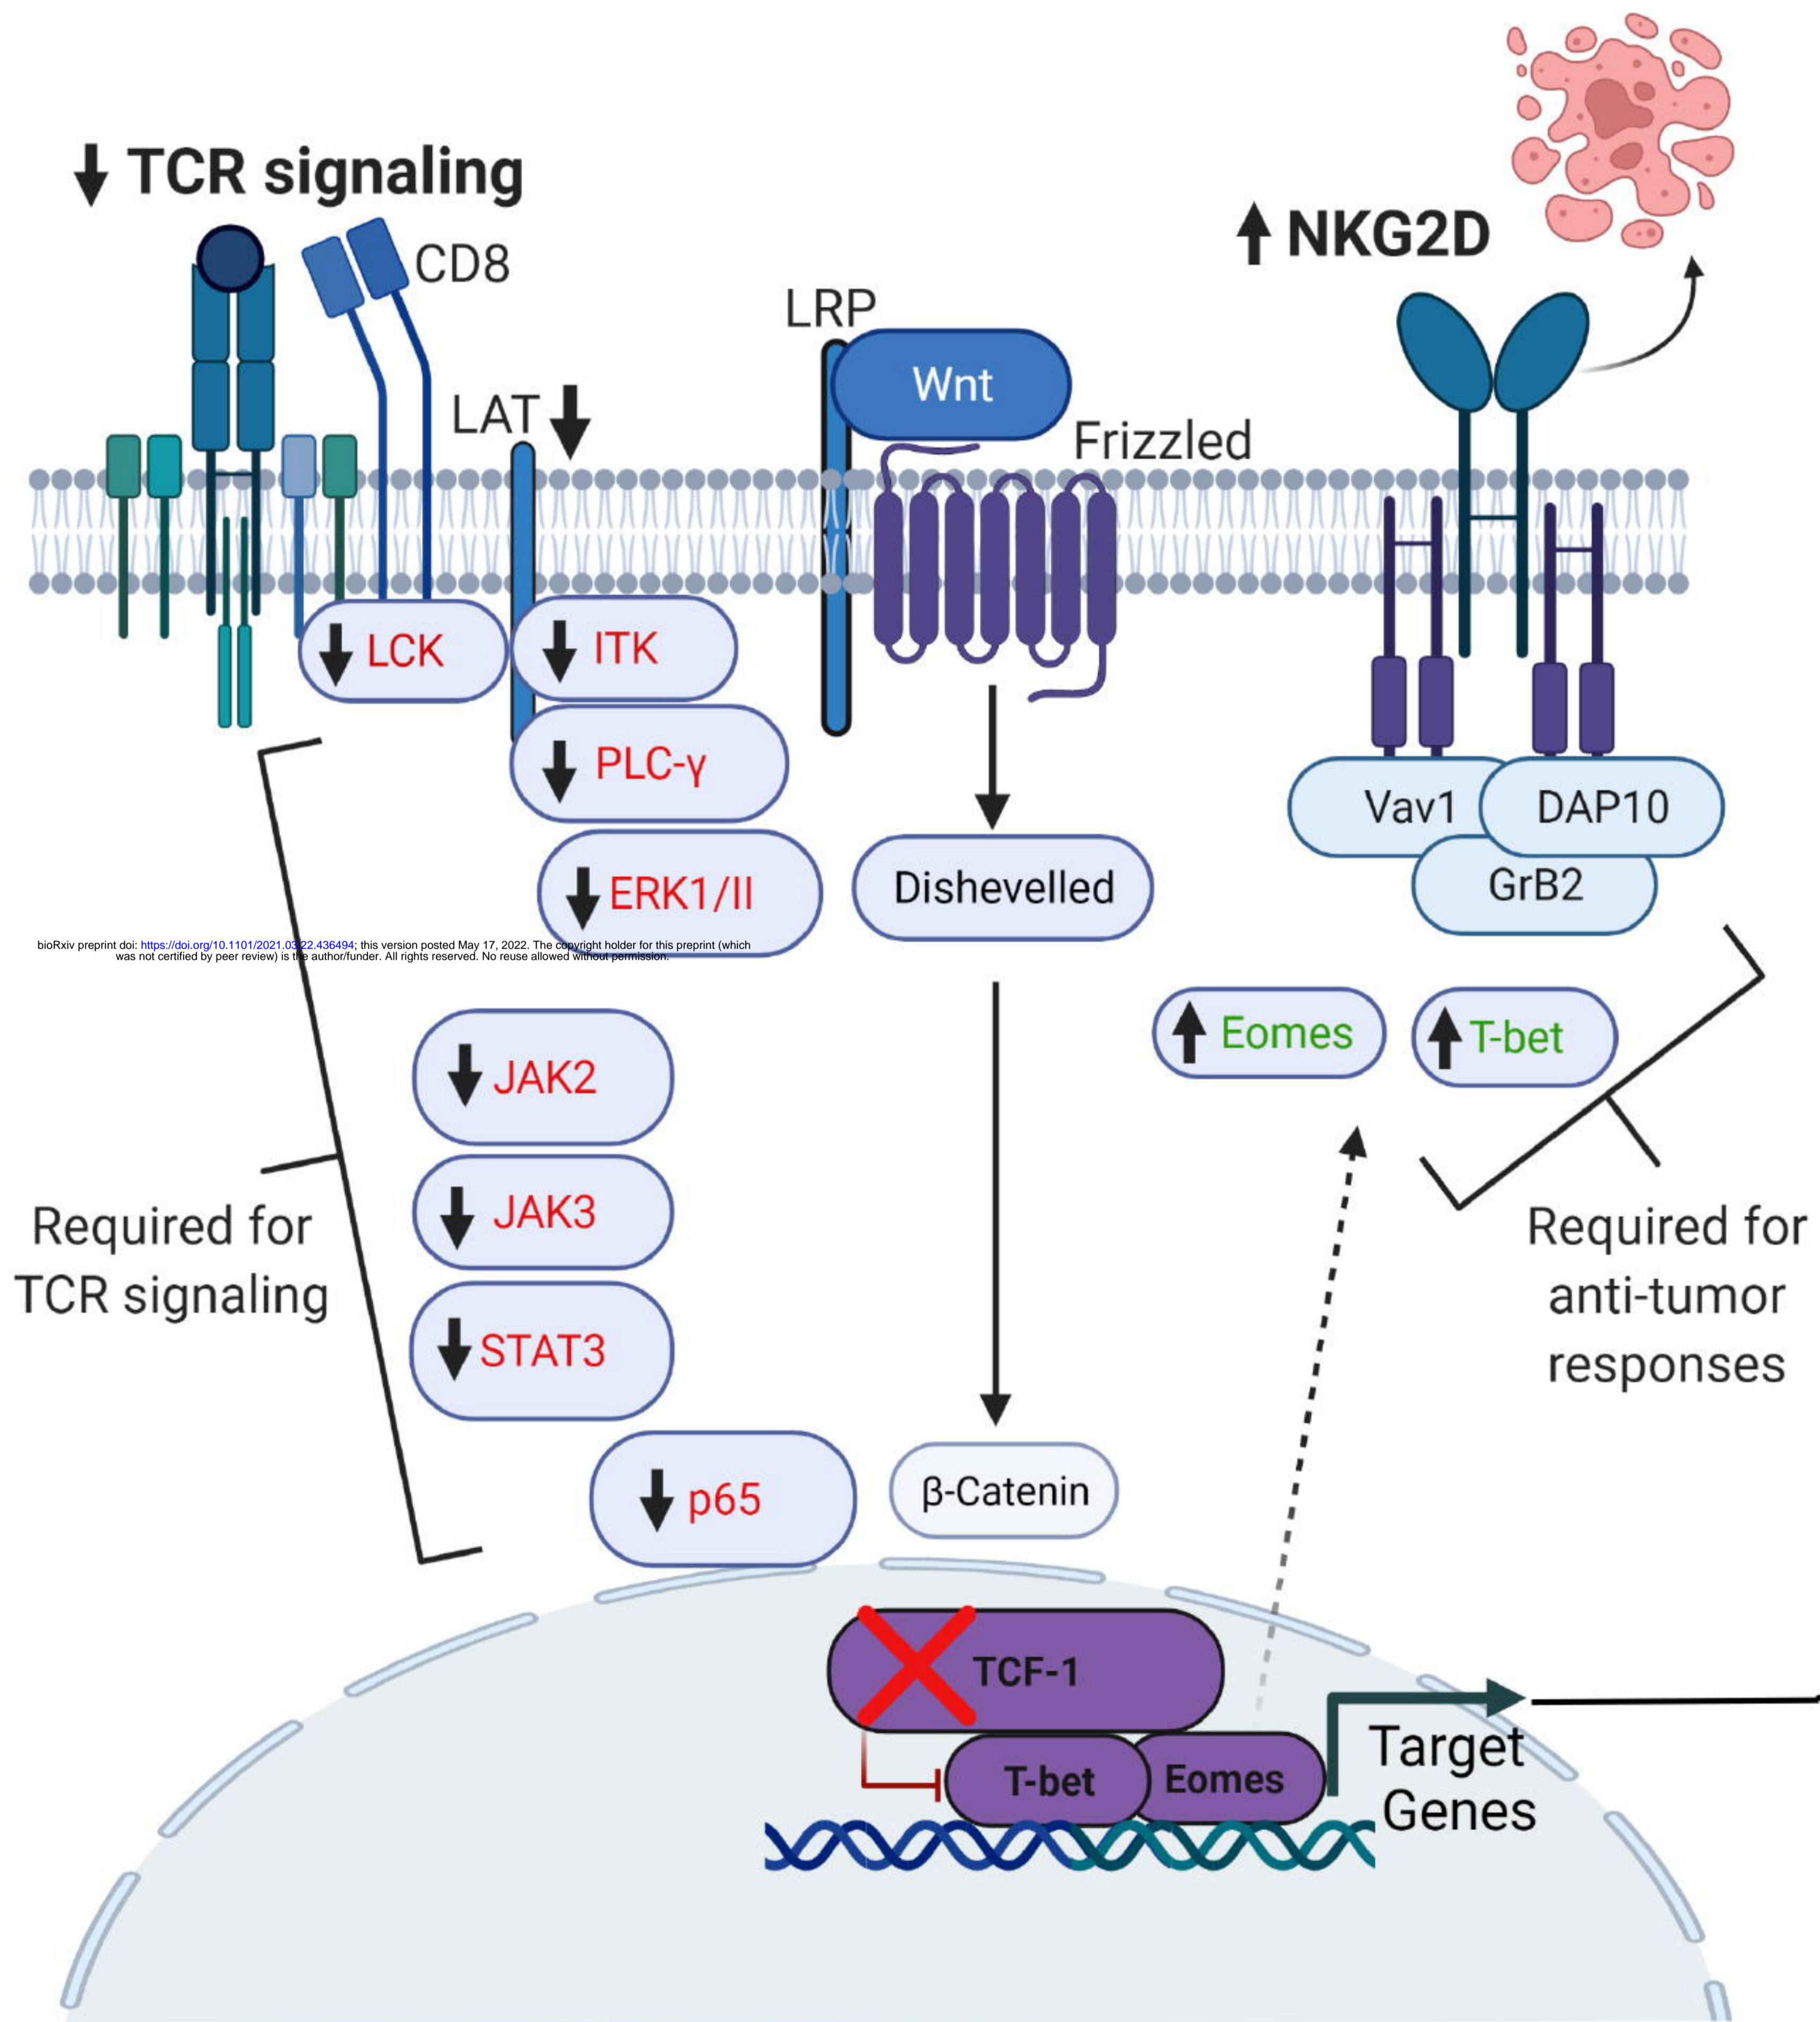

## Anti-Tumor Function

**Molecular Mechanisms**

Gene expression 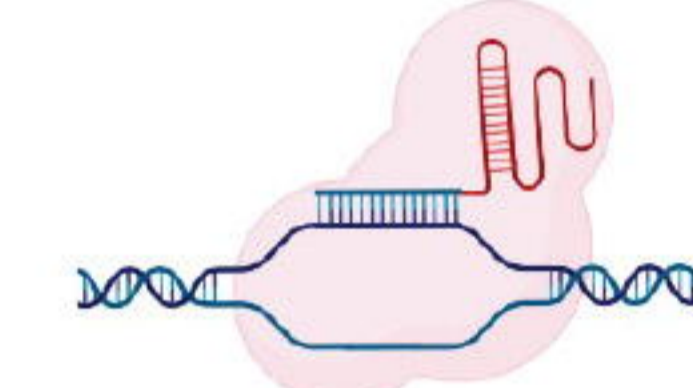 **LCK, LAT, ITK, PLC-g, p65, Erk1/II, JAK2, JAK3, STAT3** Significantly decreased

**Cellular Mechanisms**

|                                                                                                              |                                                                                                 |                                                                                                |
|--------------------------------------------------------------------------------------------------------------|-------------------------------------------------------------------------------------------------|------------------------------------------------------------------------------------------------|
| Inflammatory Cytokines 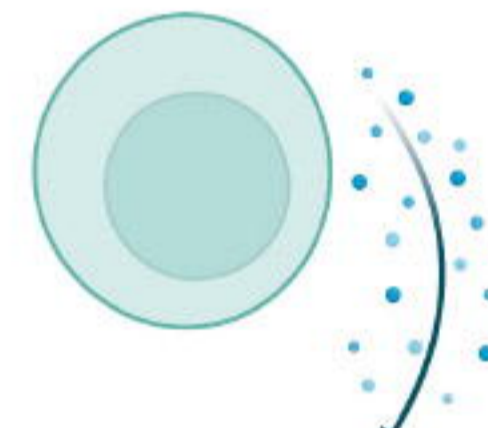 | Activation  | Apoptosis  |
|--------------------------------------------------------------------------------------------------------------|-------------------------------------------------------------------------------------------------|------------------------------------------------------------------------------------------------|

**Clinical Impact**

Less damage to GVHD target organs   

**Anti-Tumor Response**

Increased Eomes, T-bet, and surface NKG2D expression

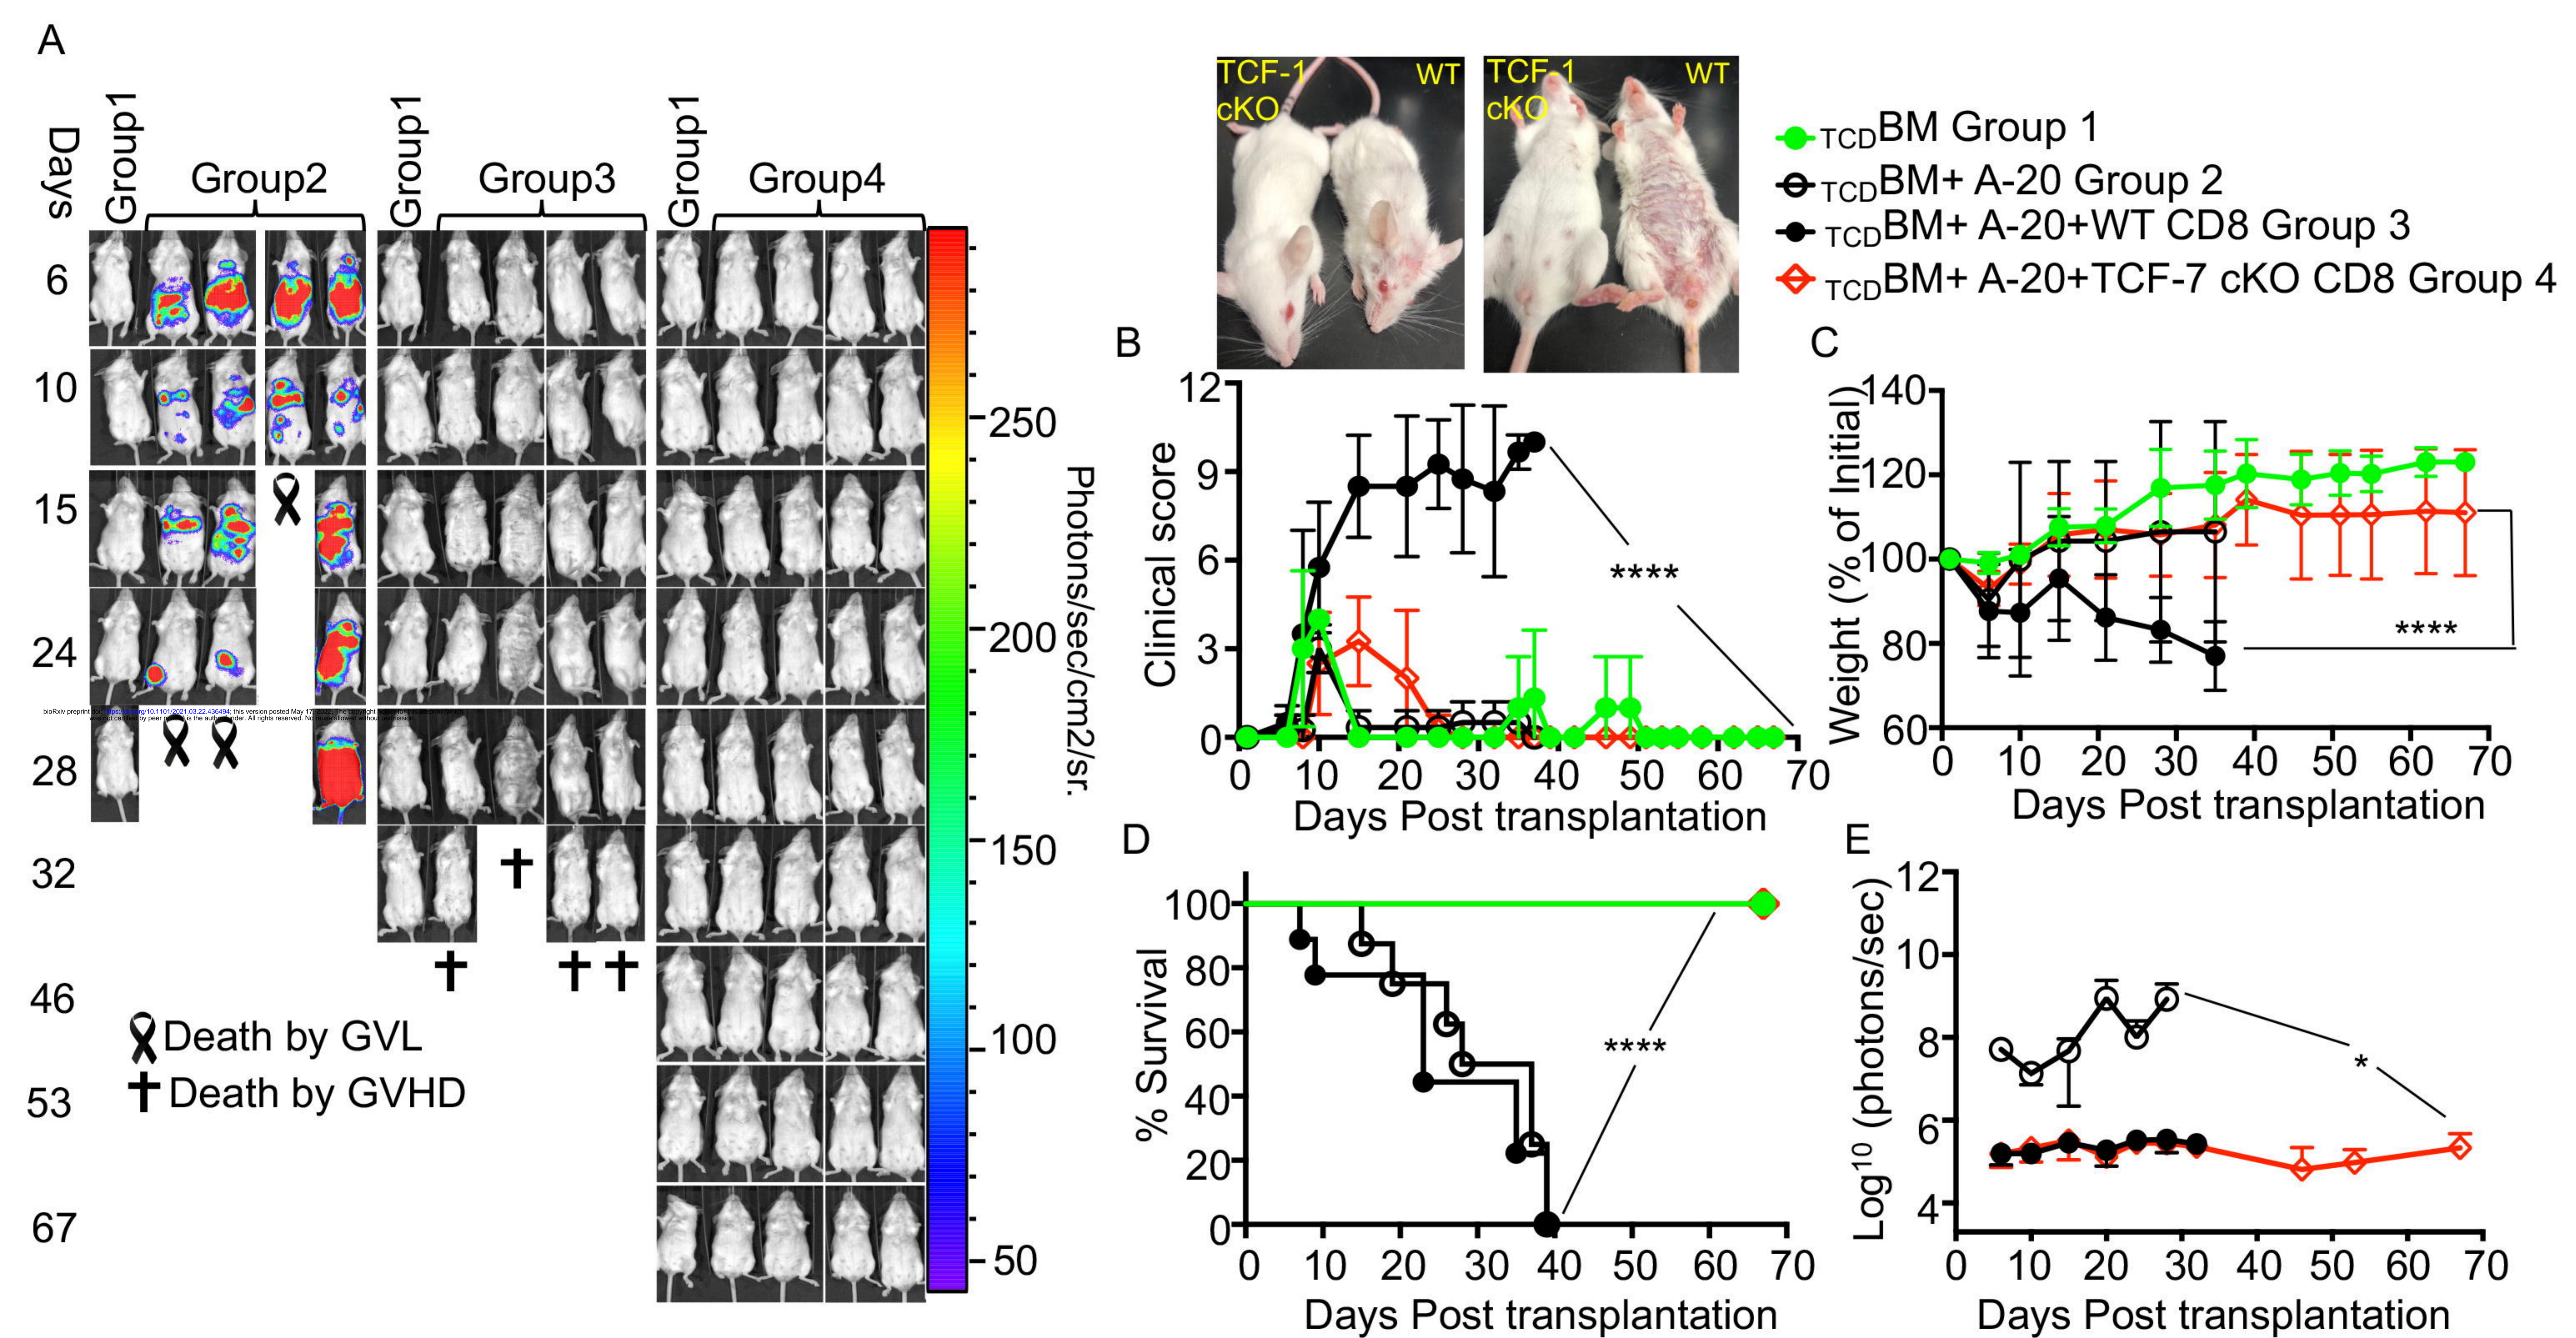

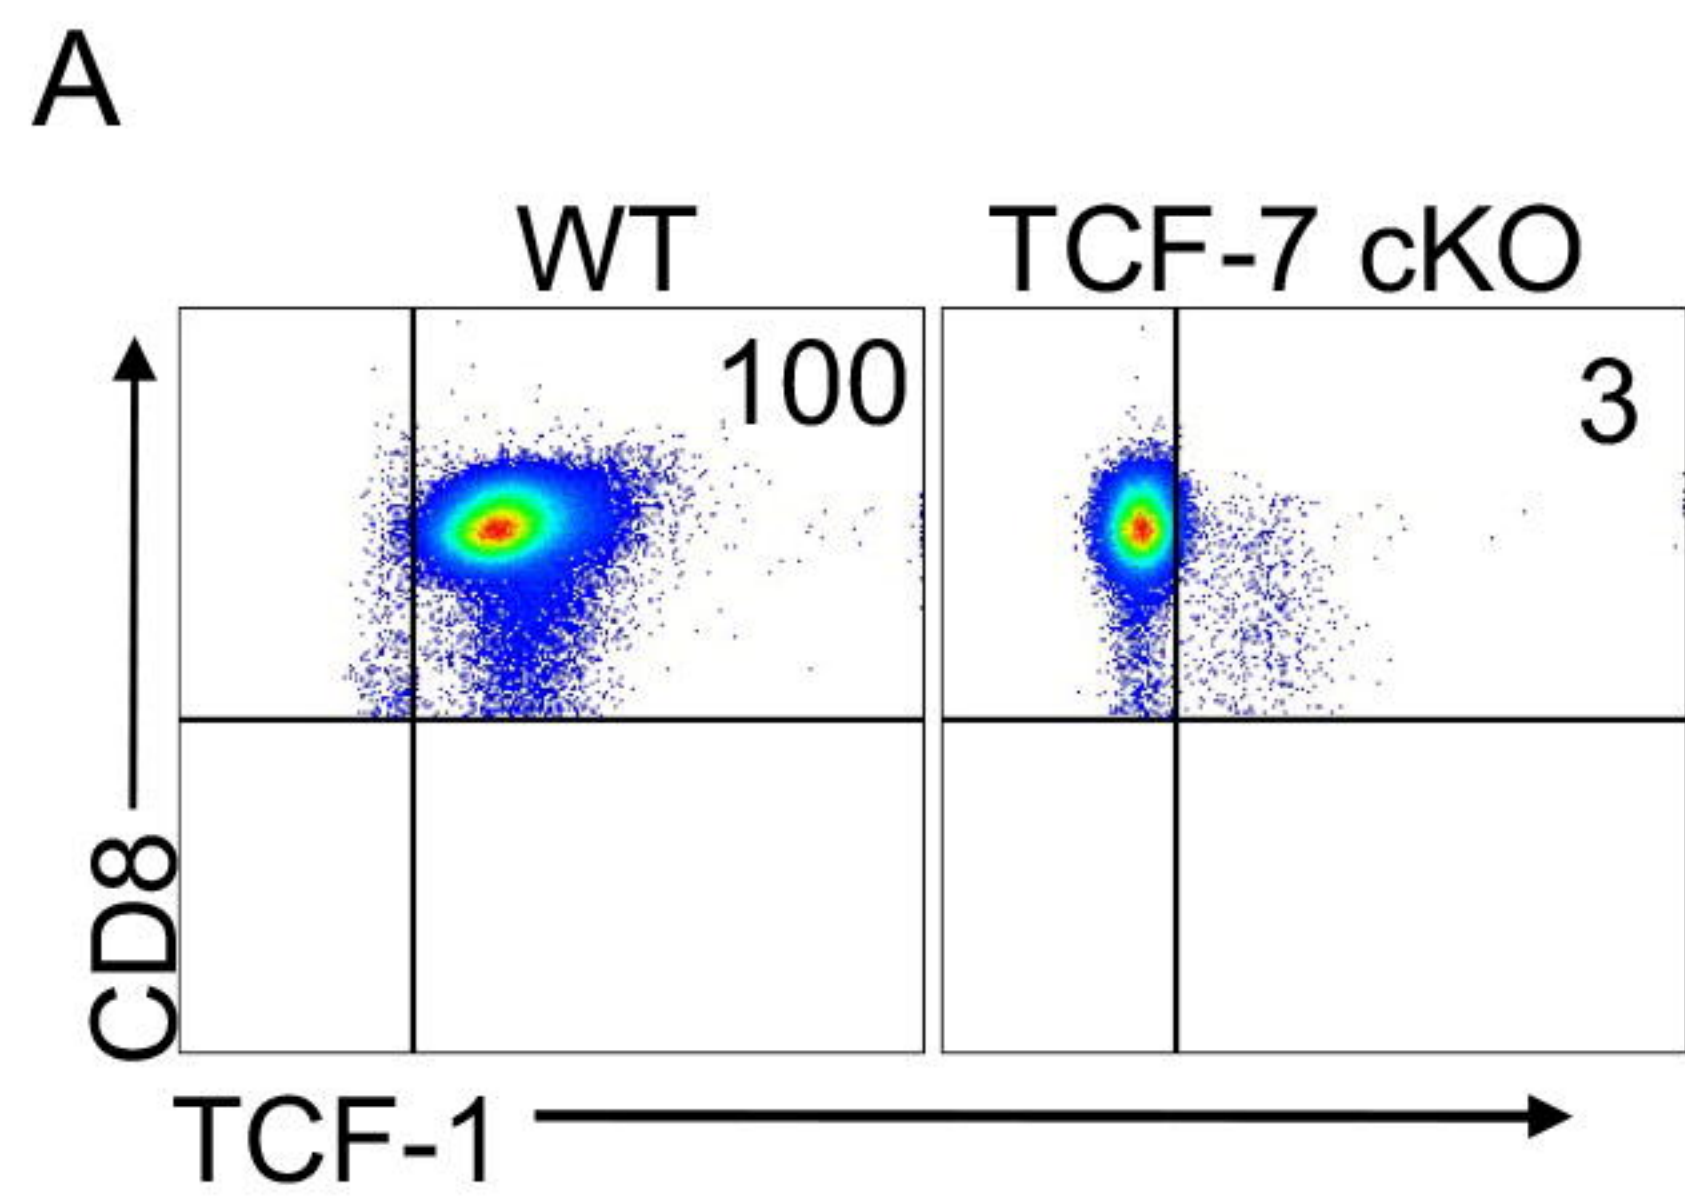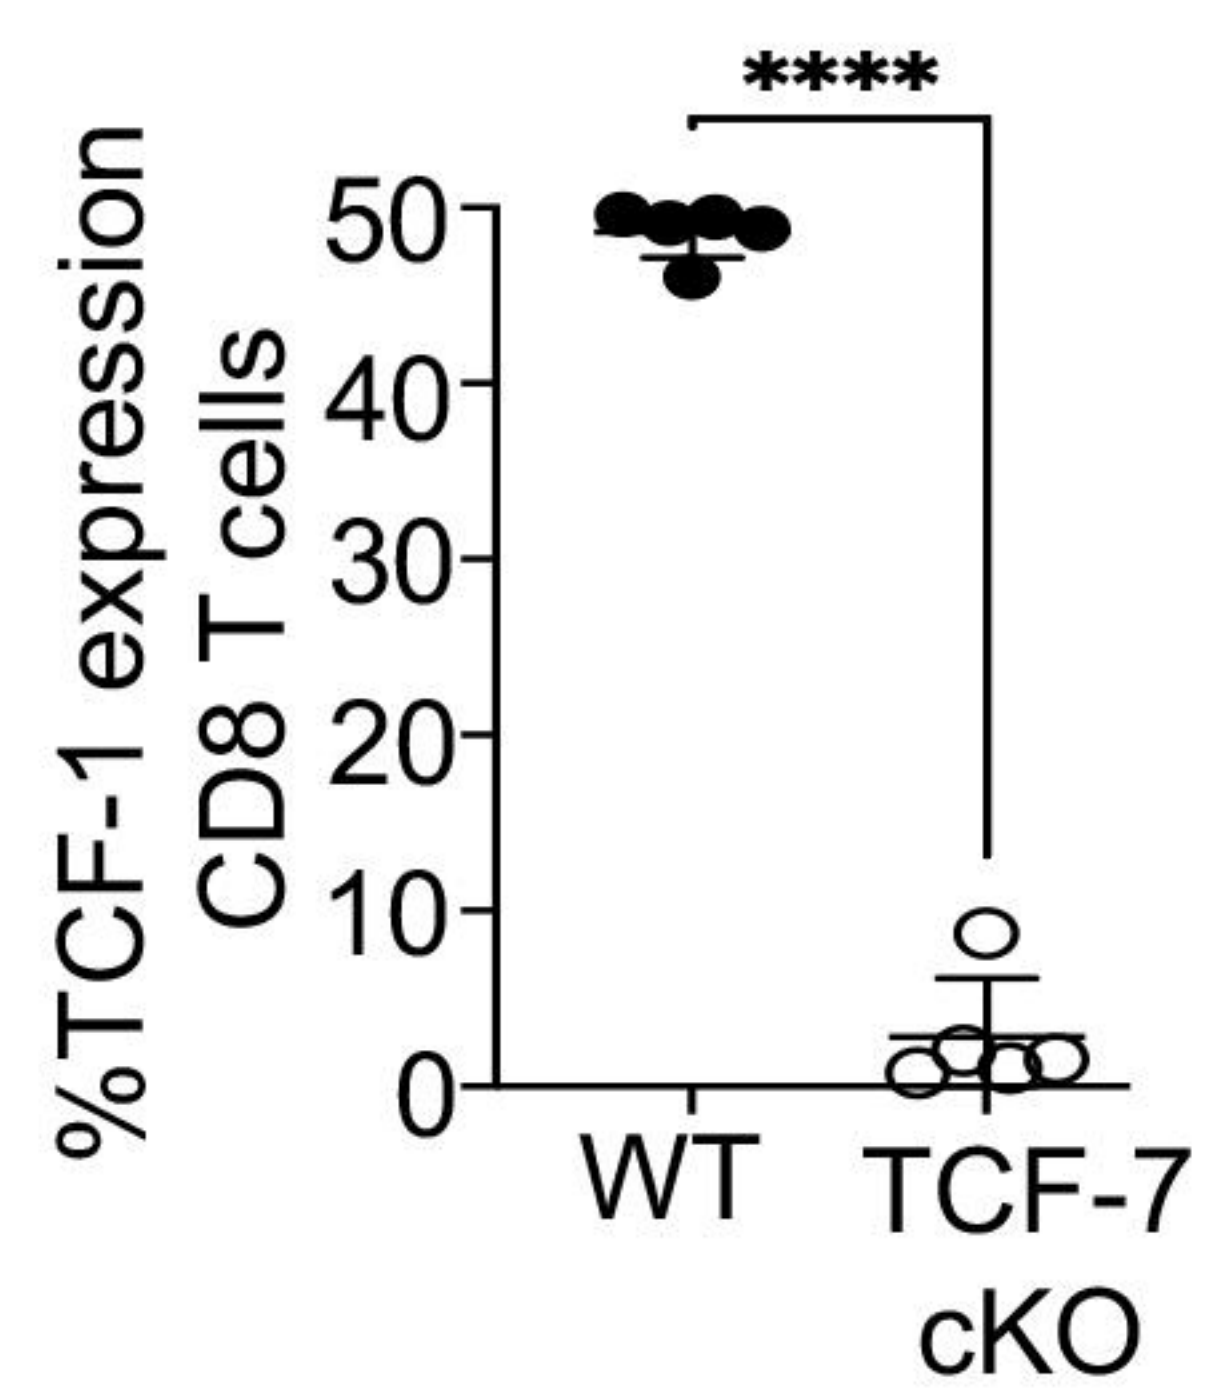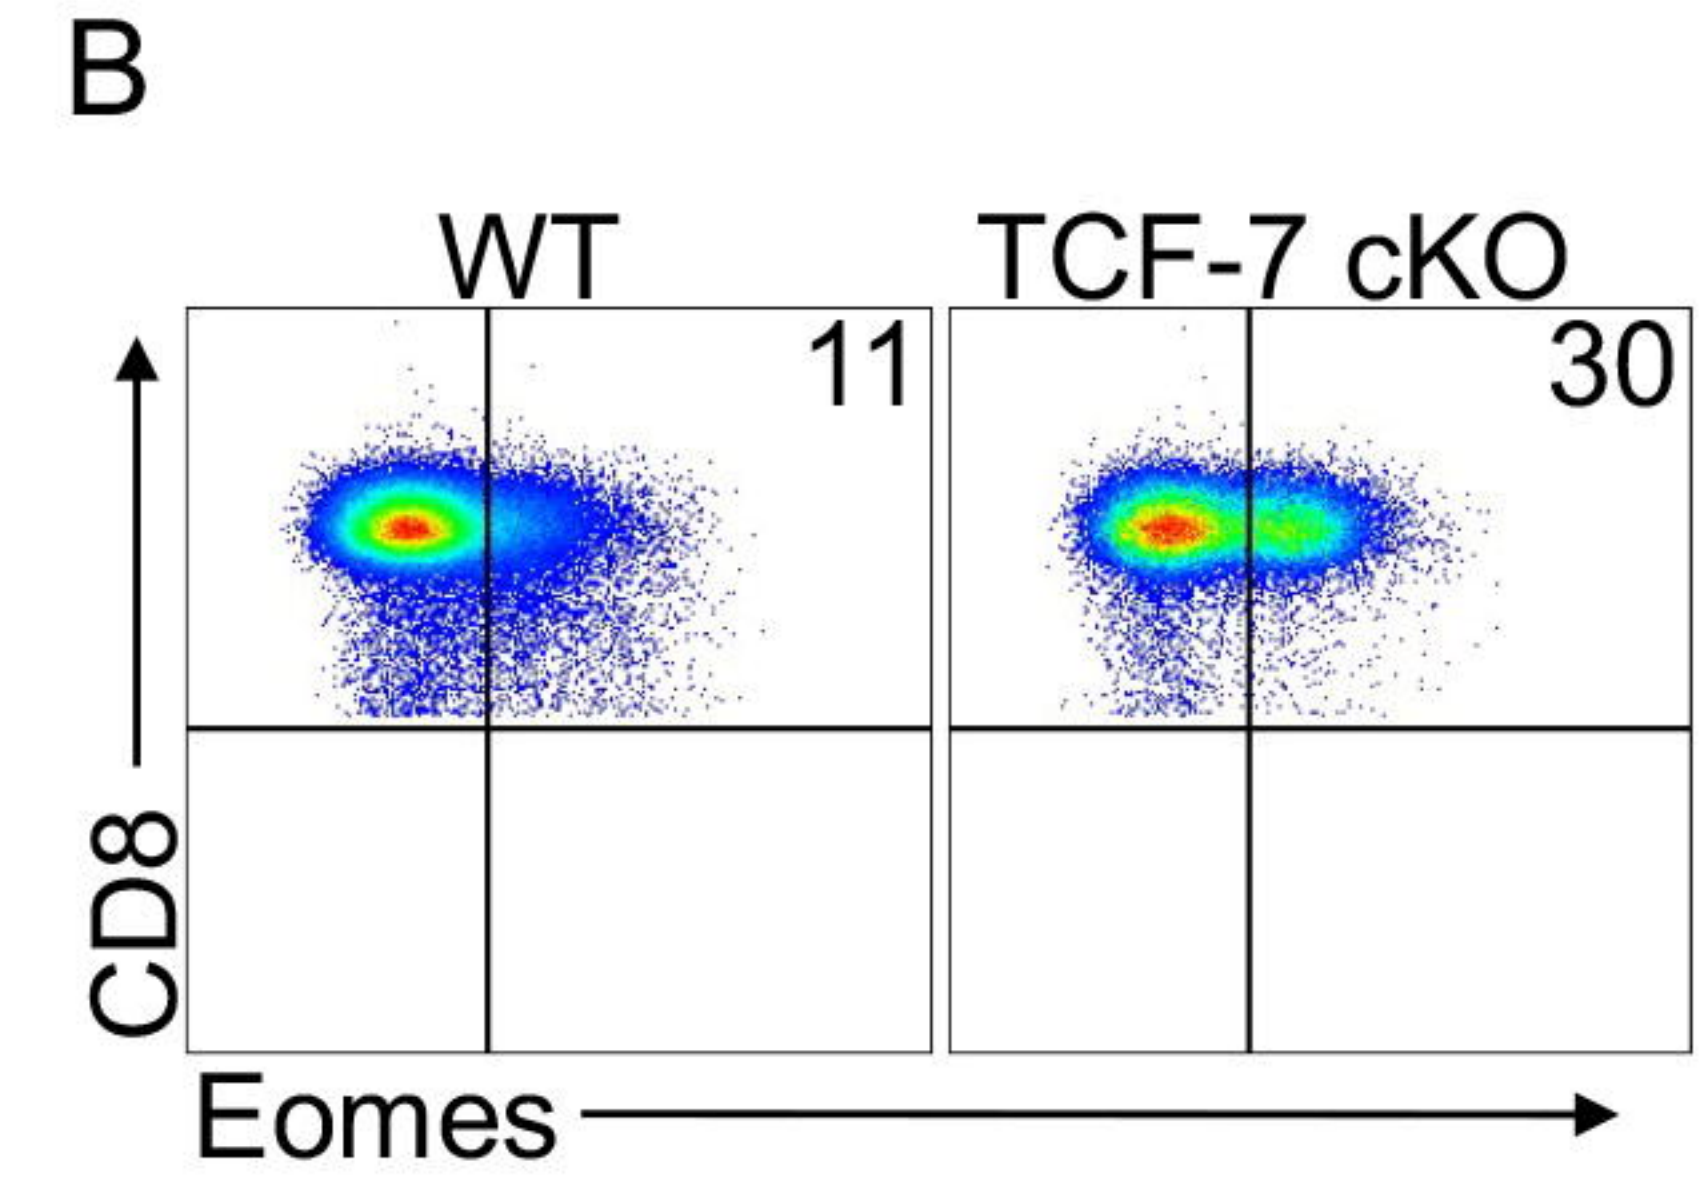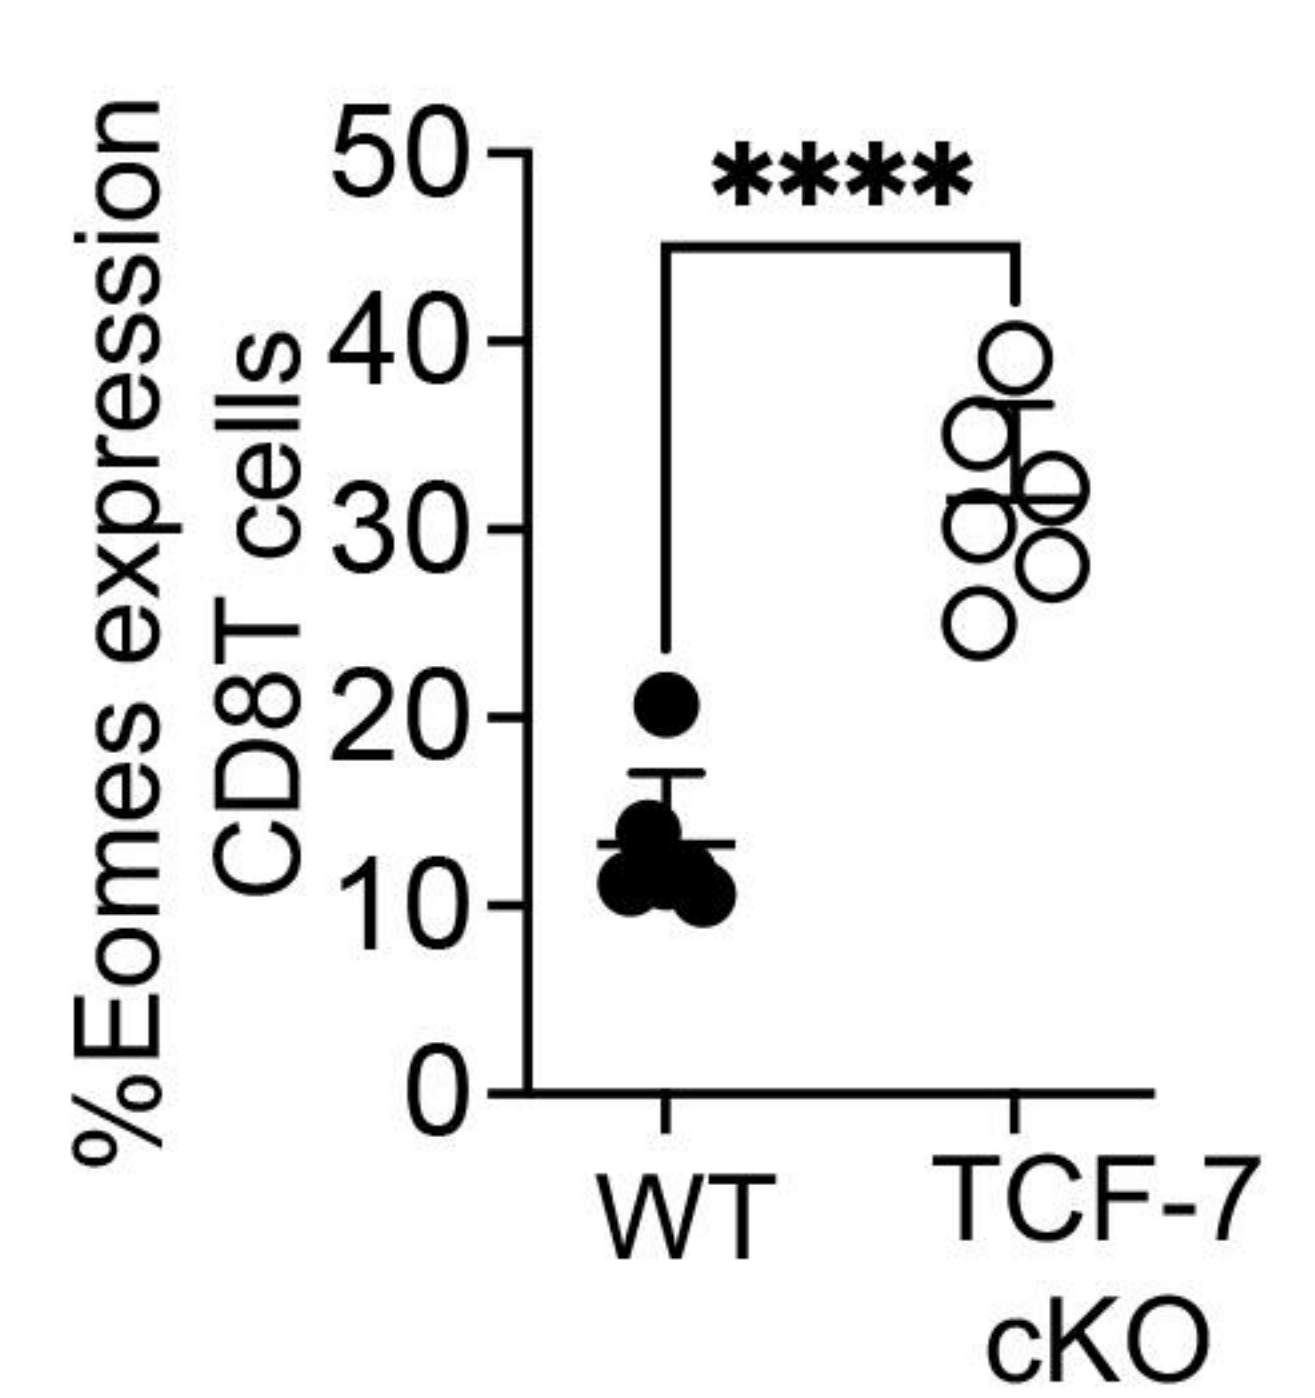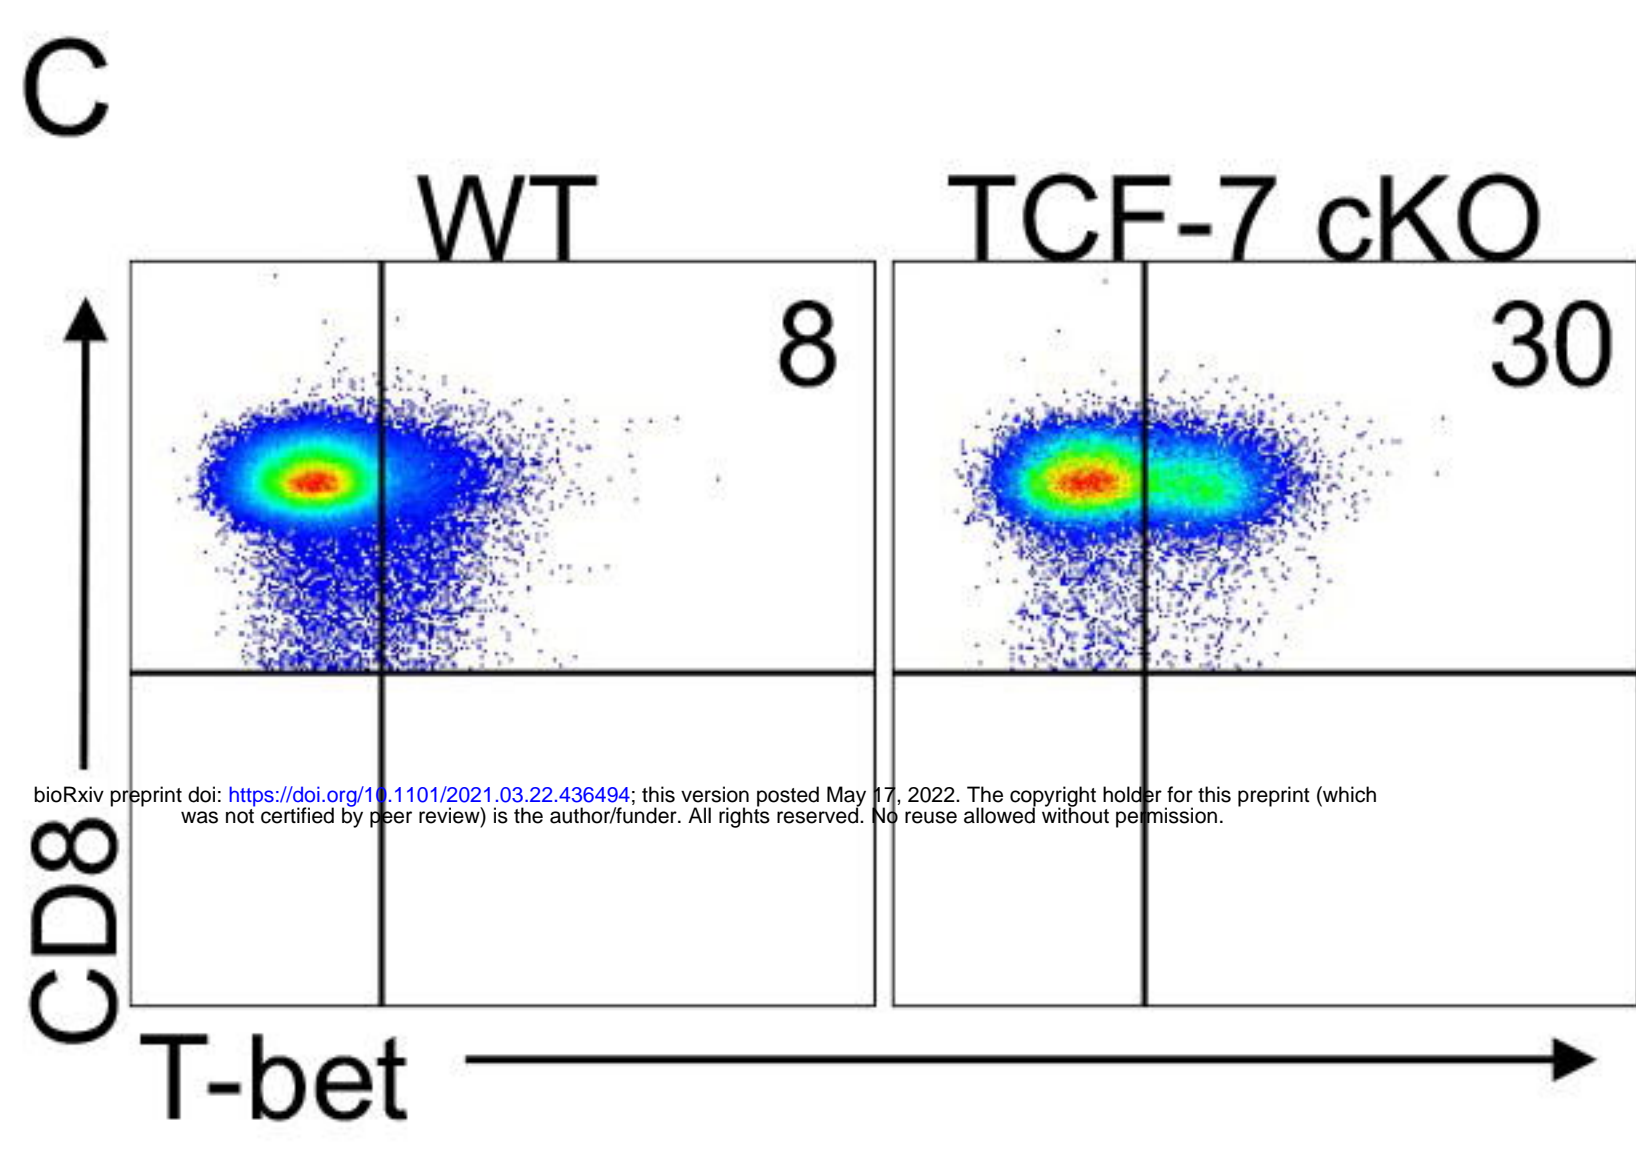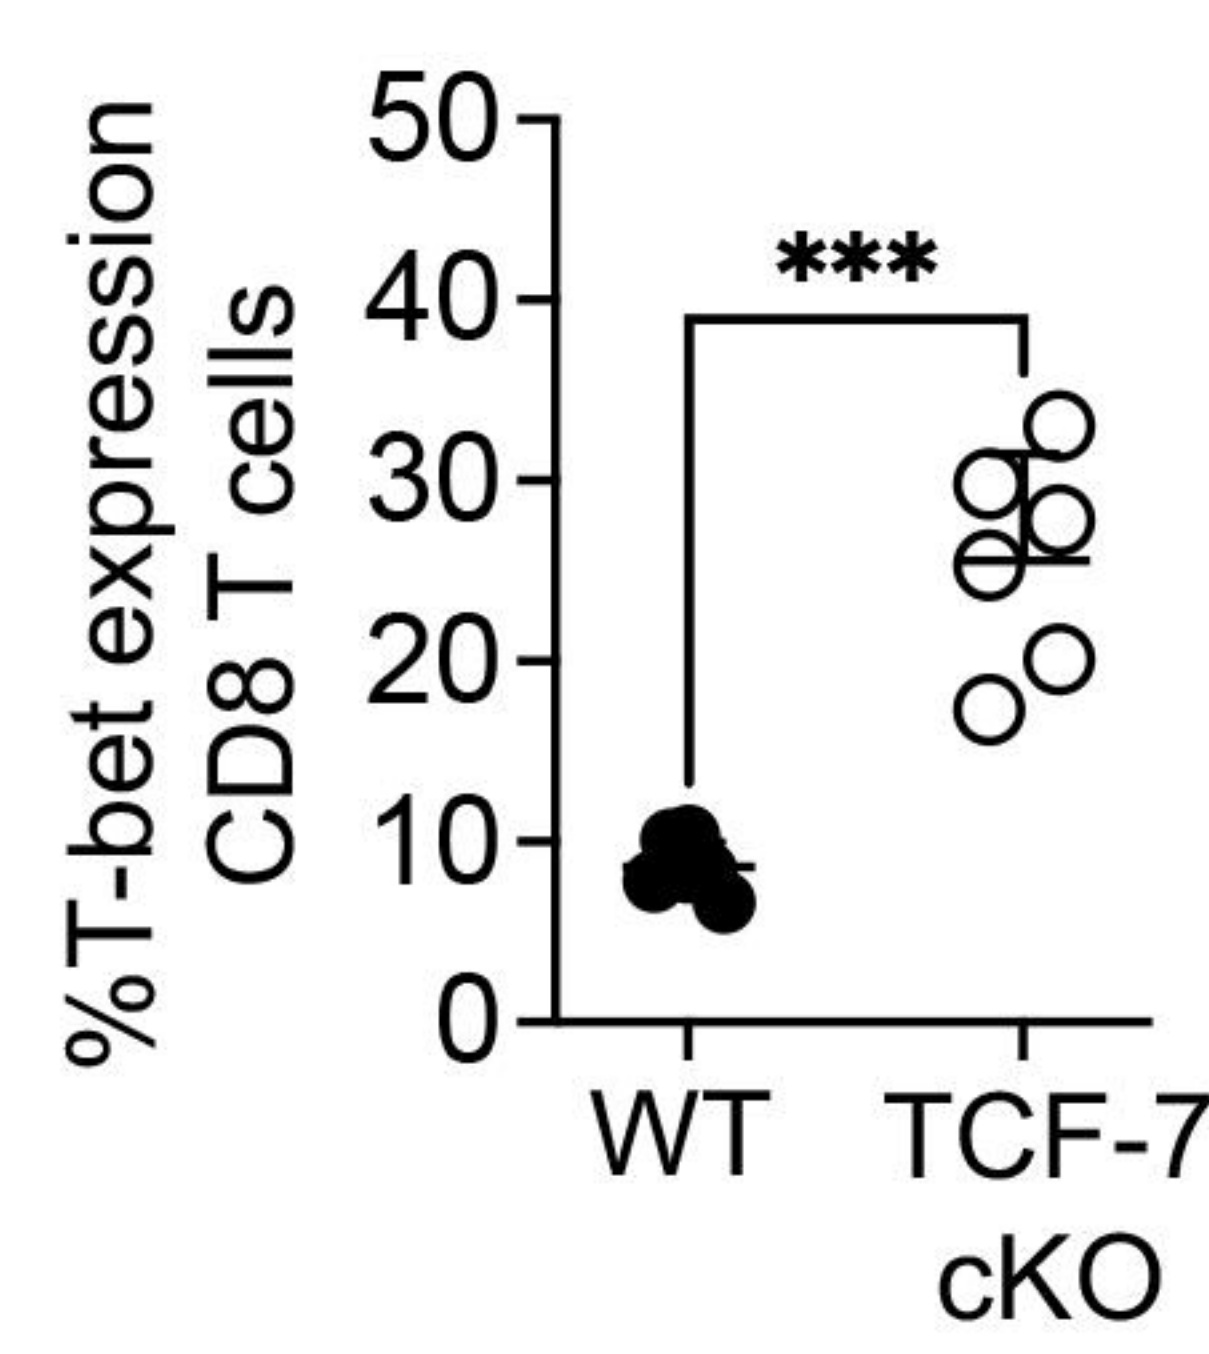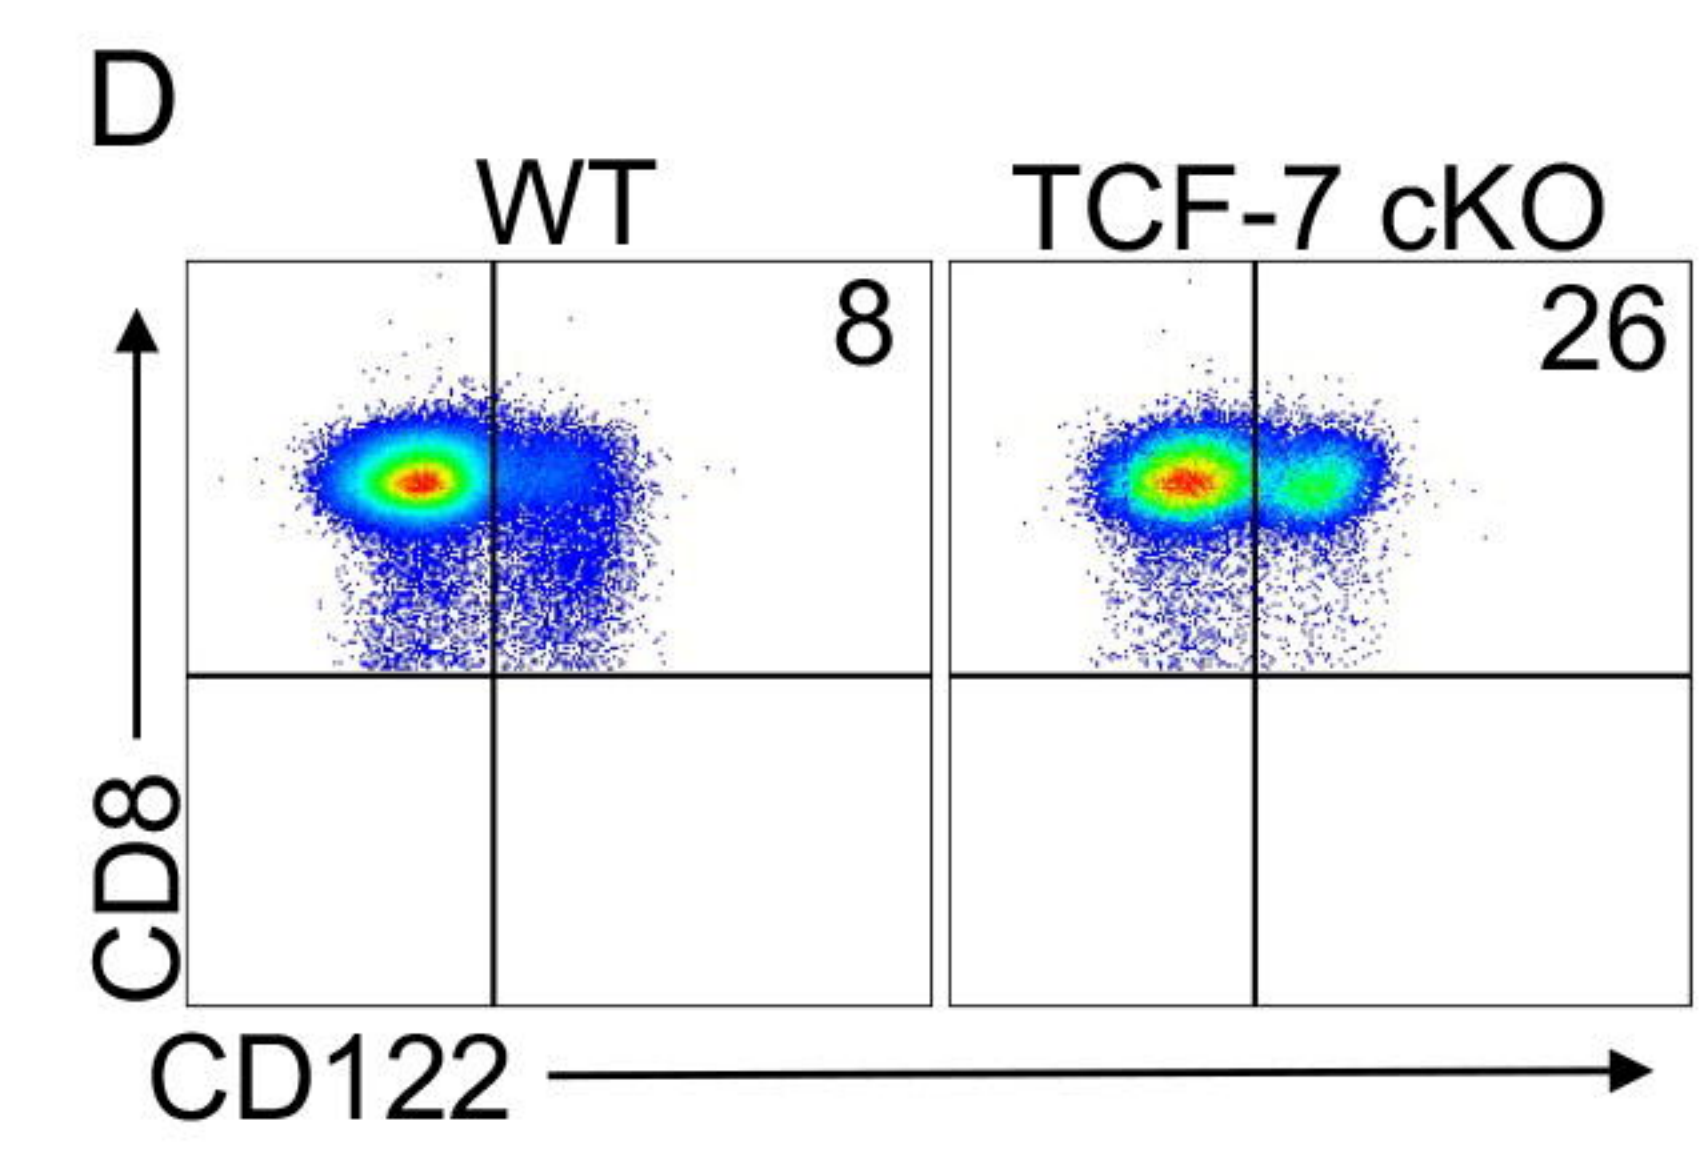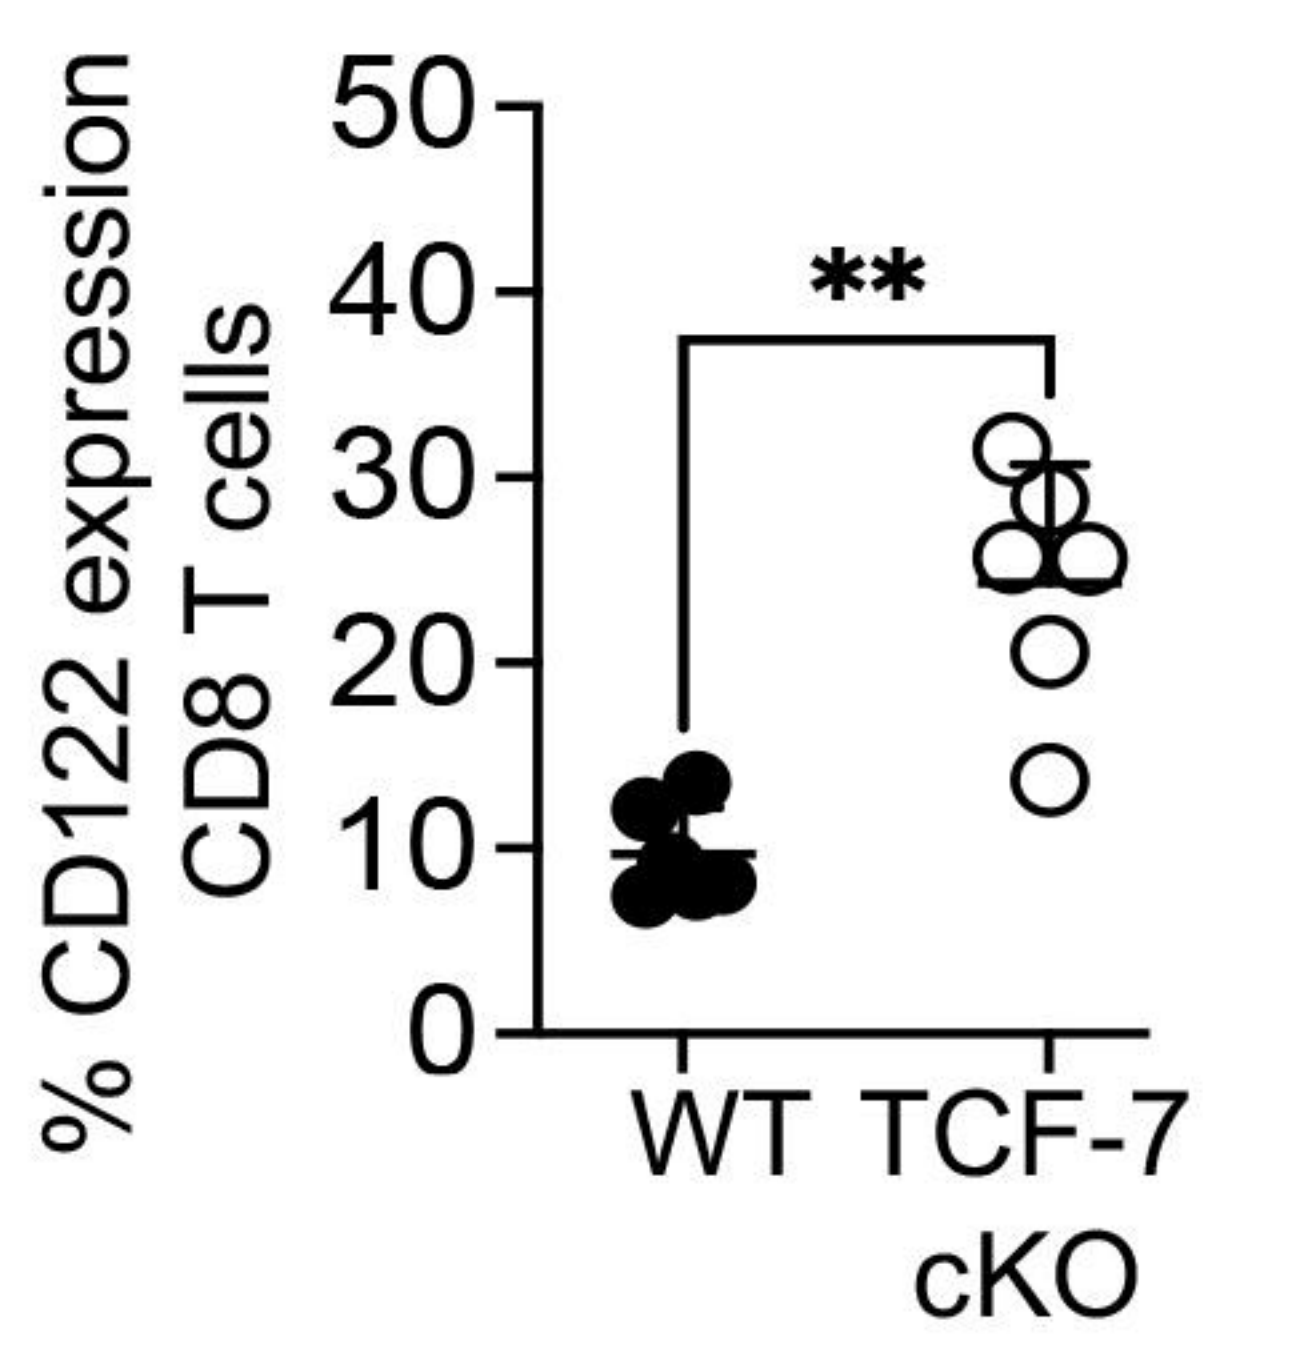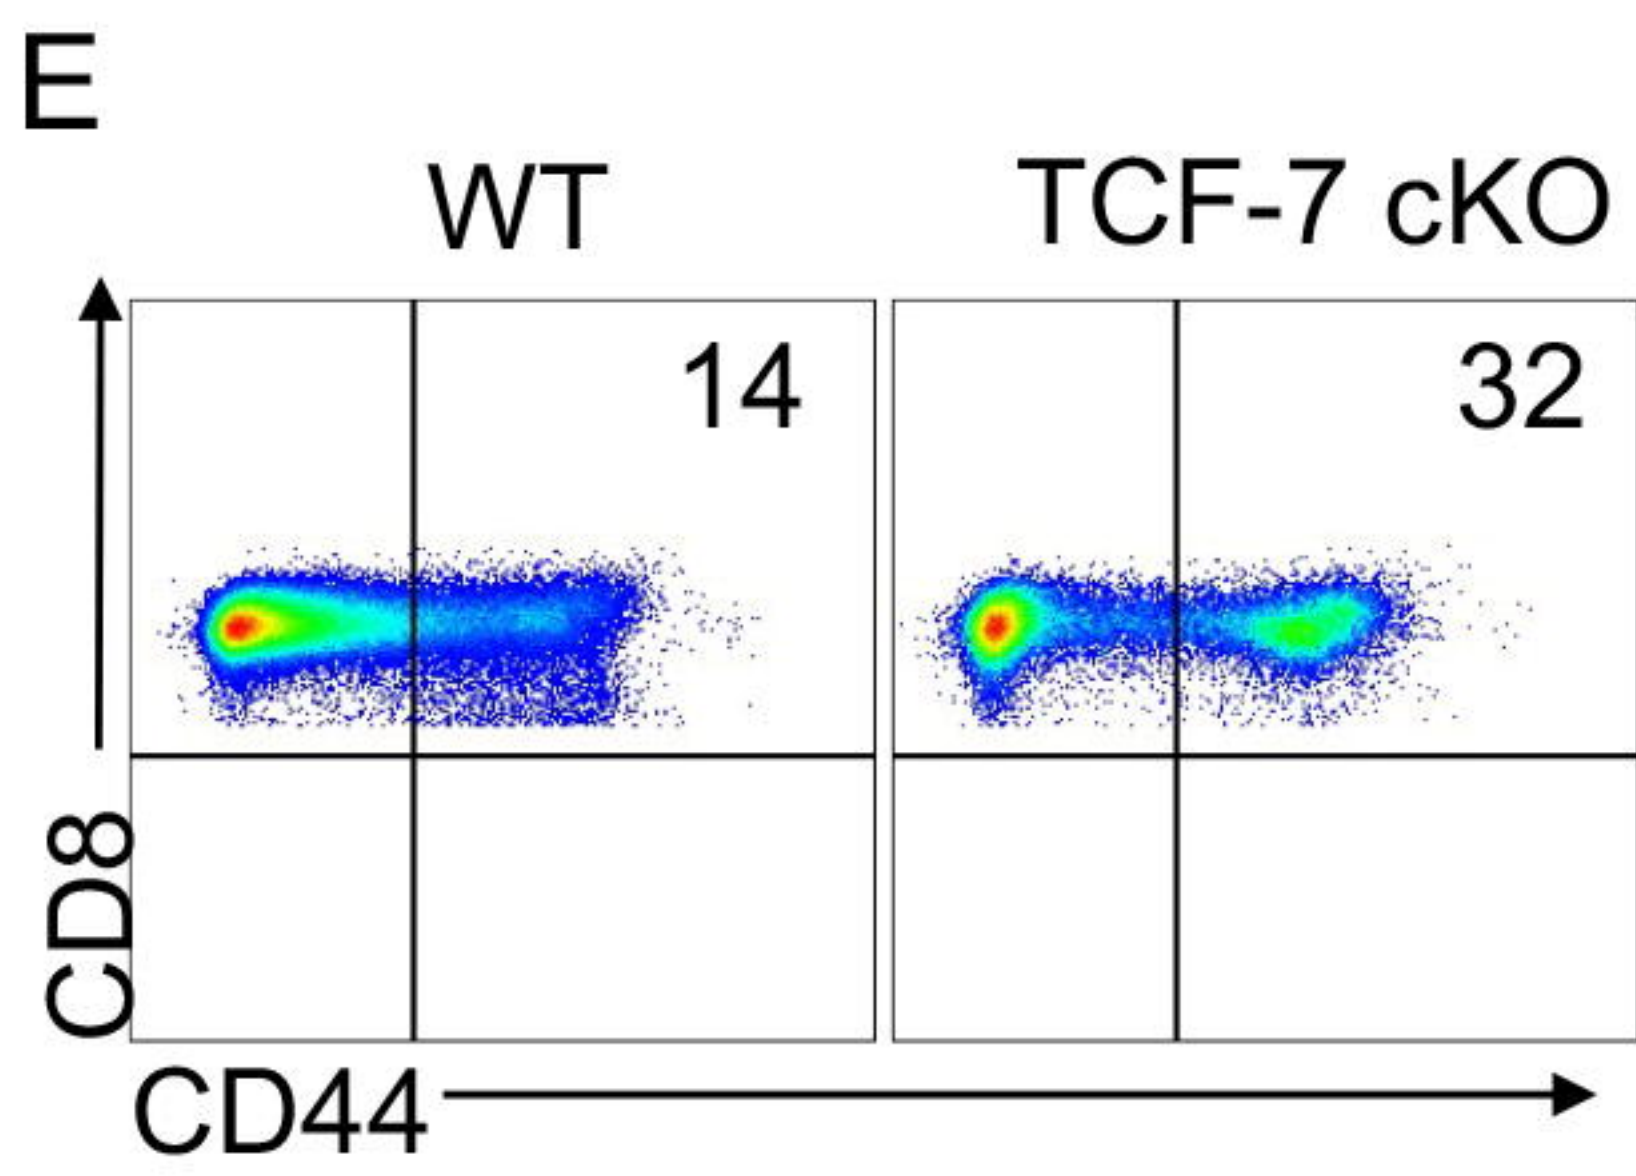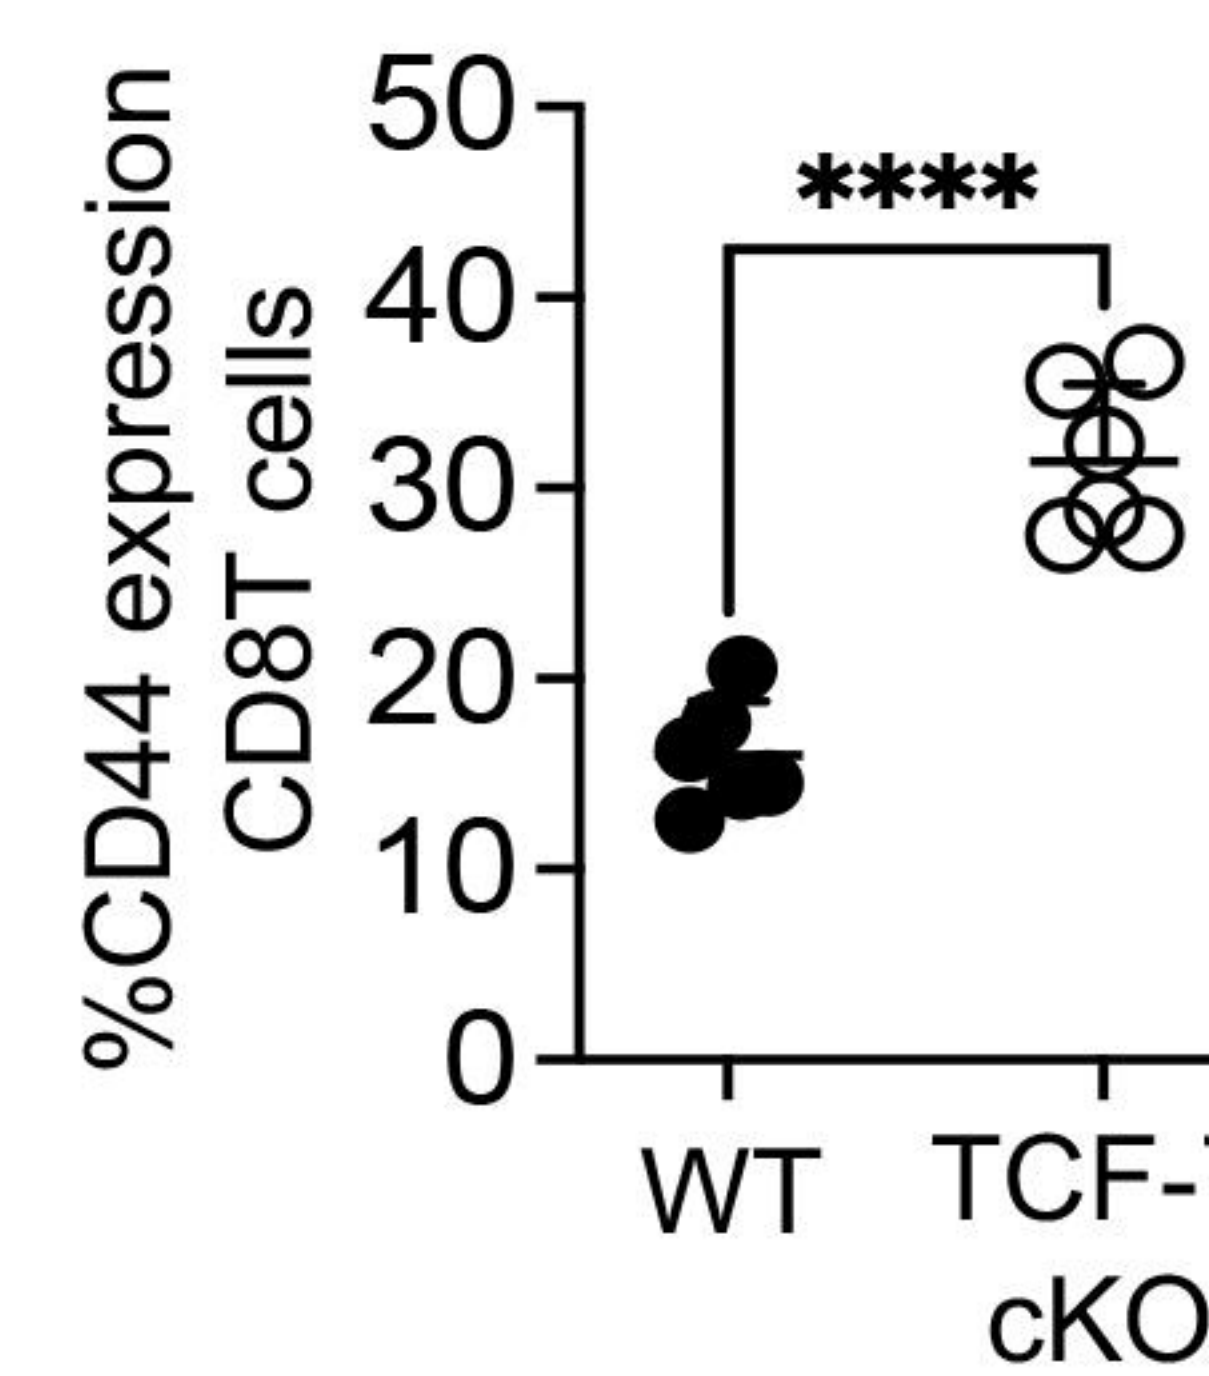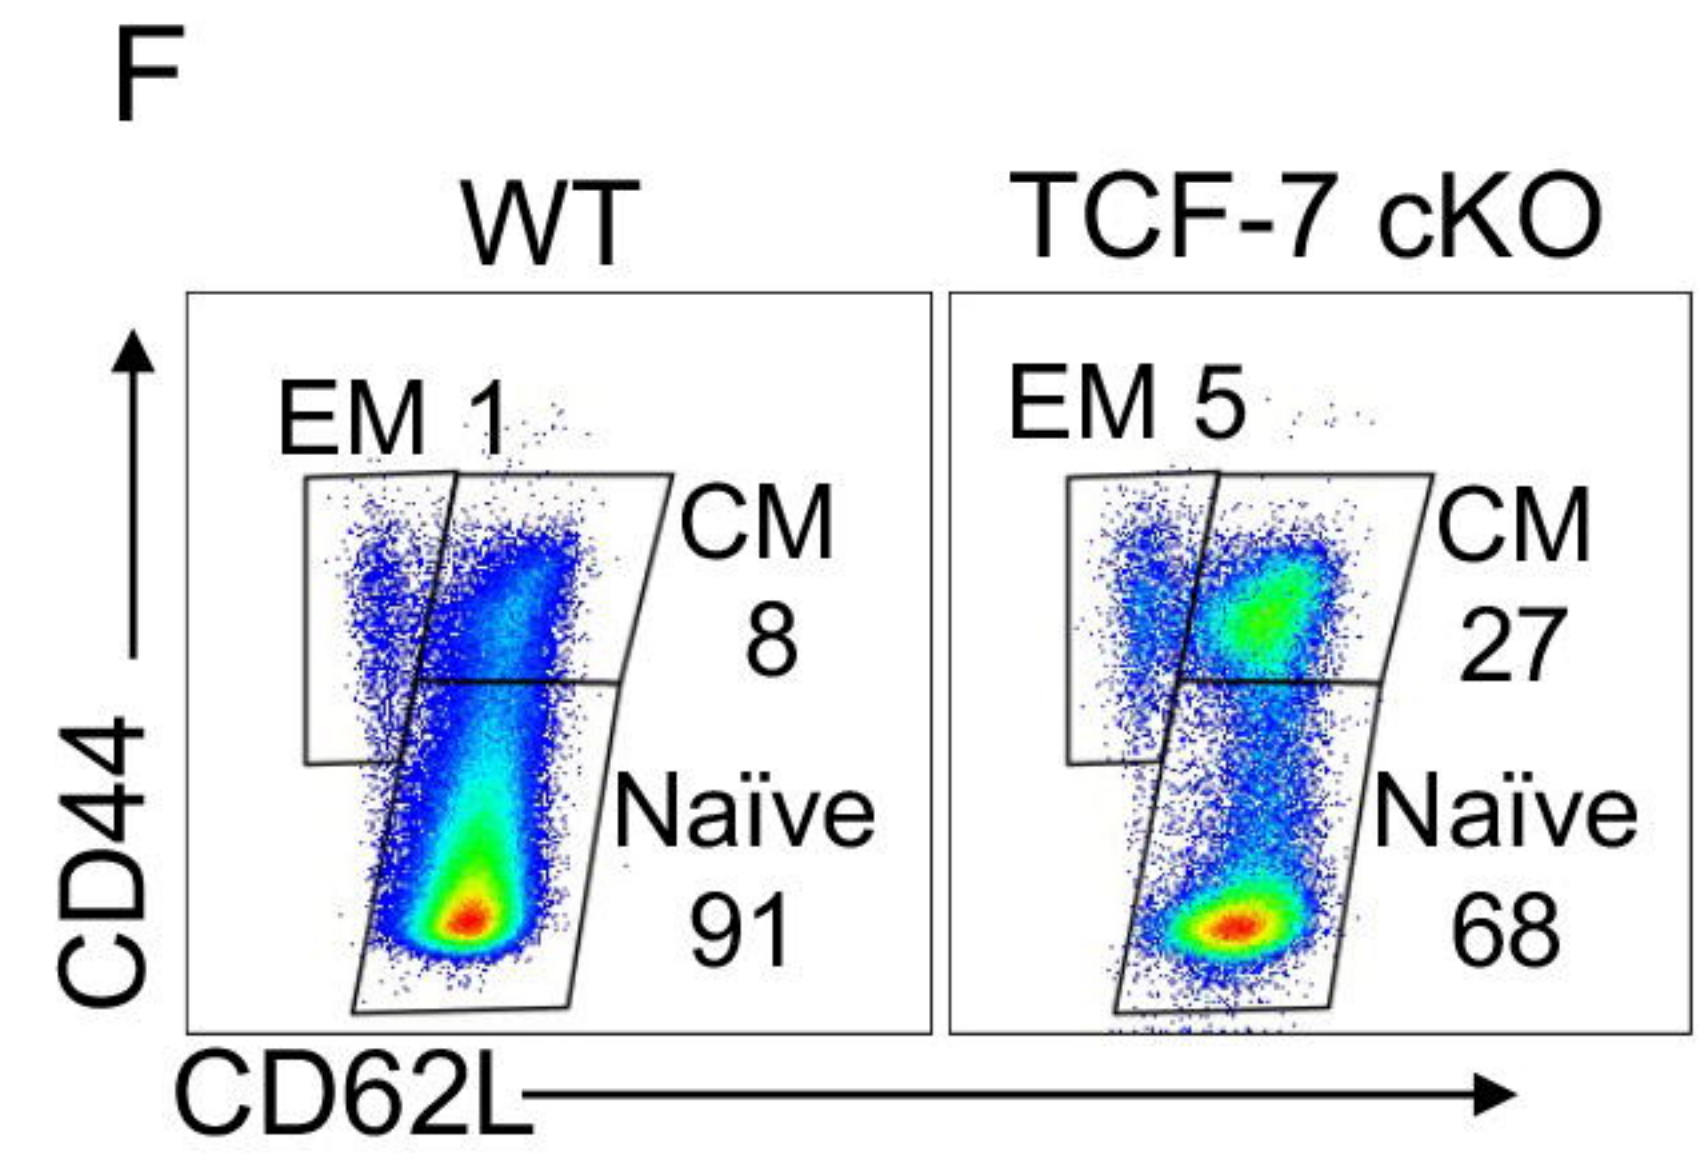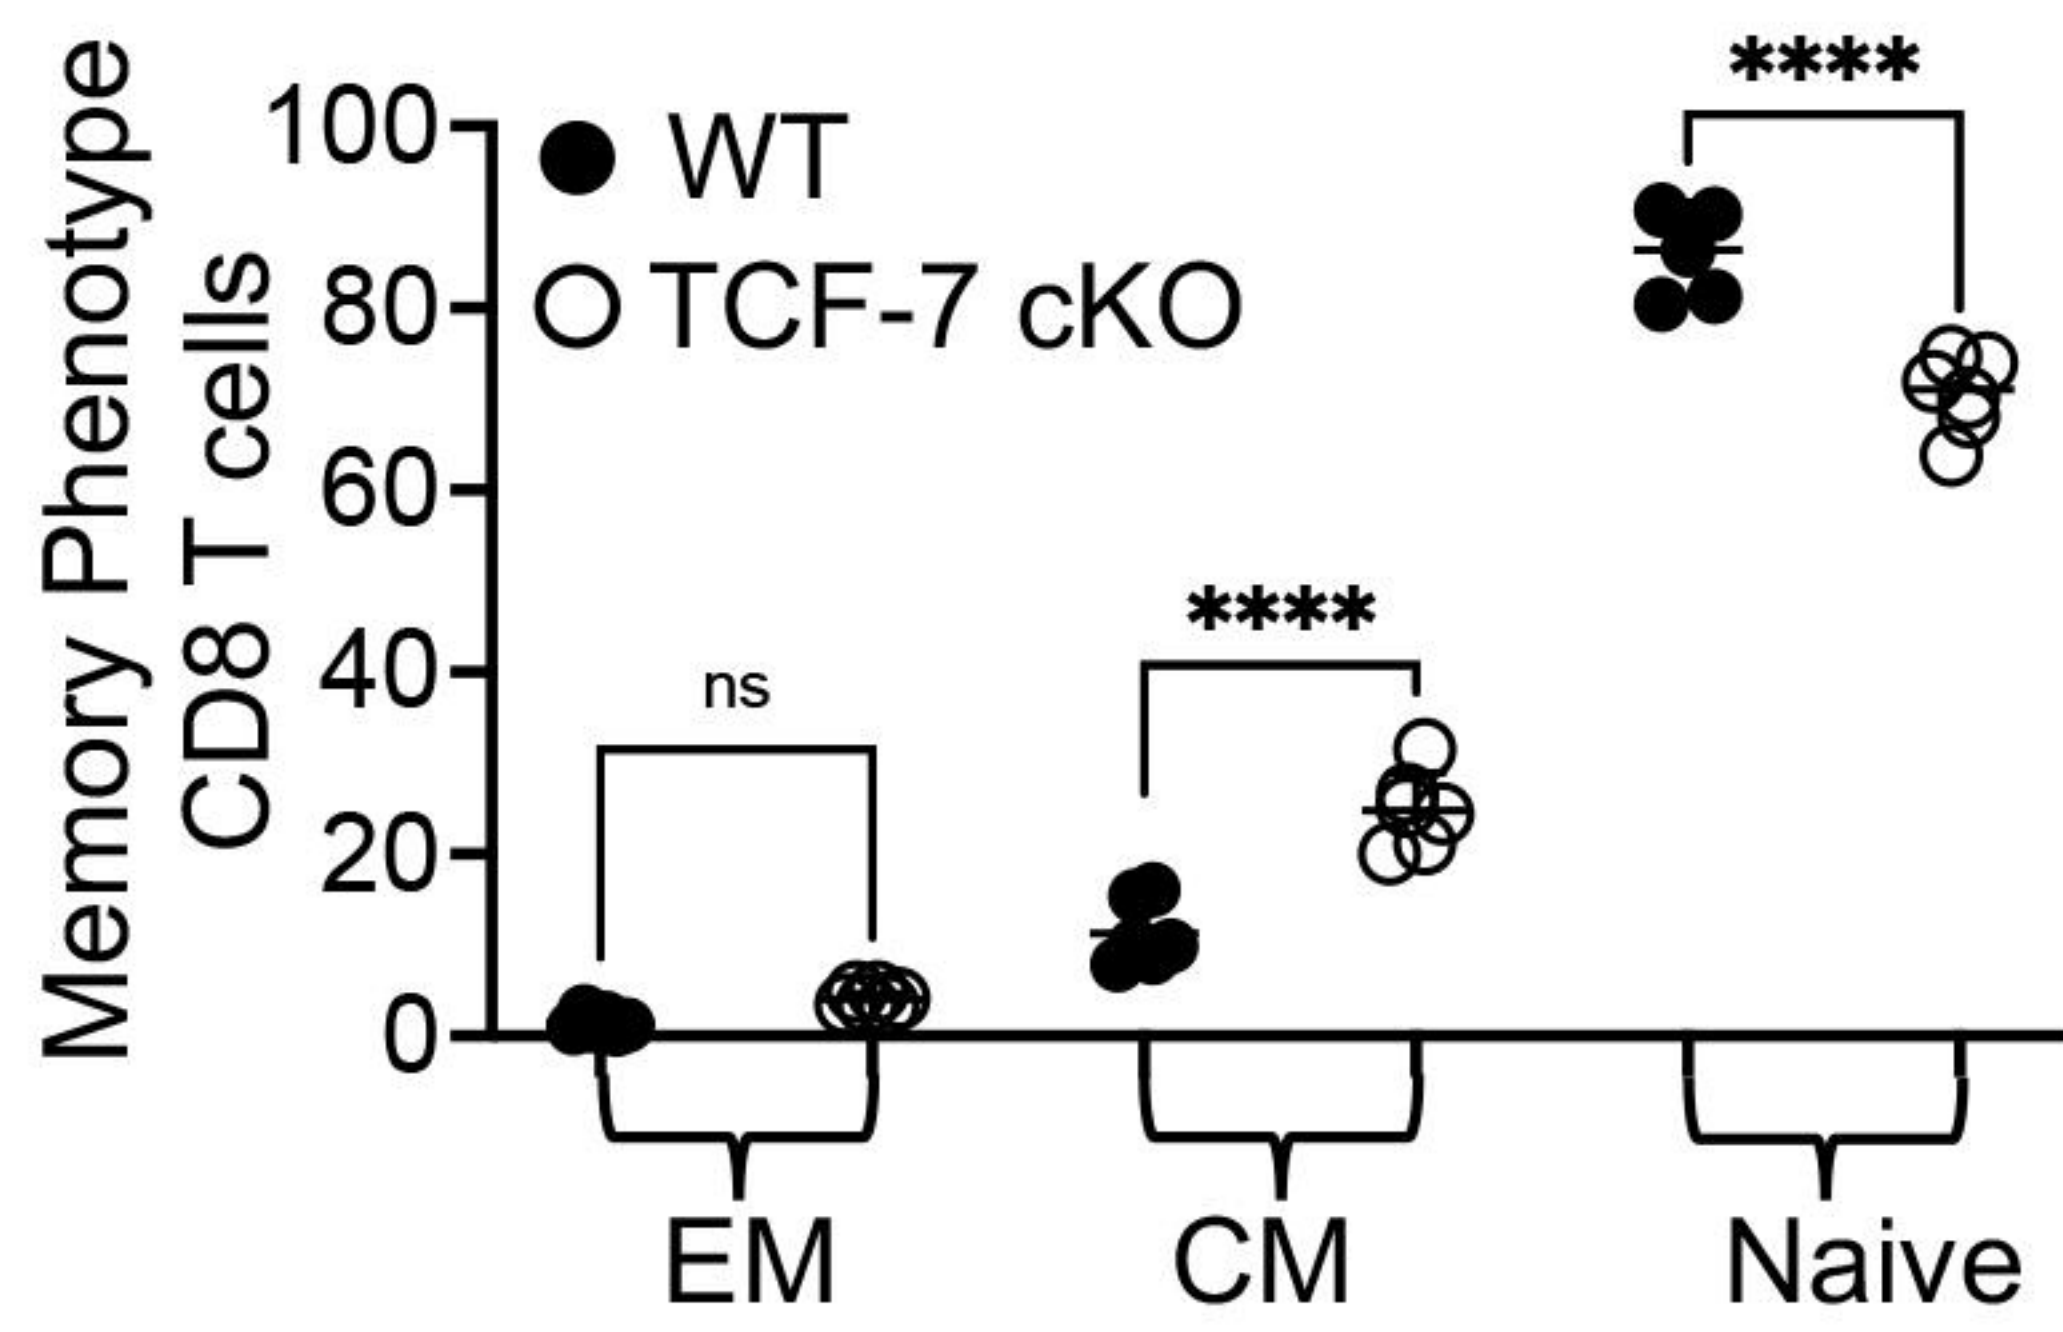

bioRxiv preprint doi: <https://doi.org/10.1101/2021.03.22.436494>; this version posted May 7, 2022. The copyright holder for this preprint (which was not certified by peer review) is the author/funder. All rights reserved. No reuse allowed without permission.

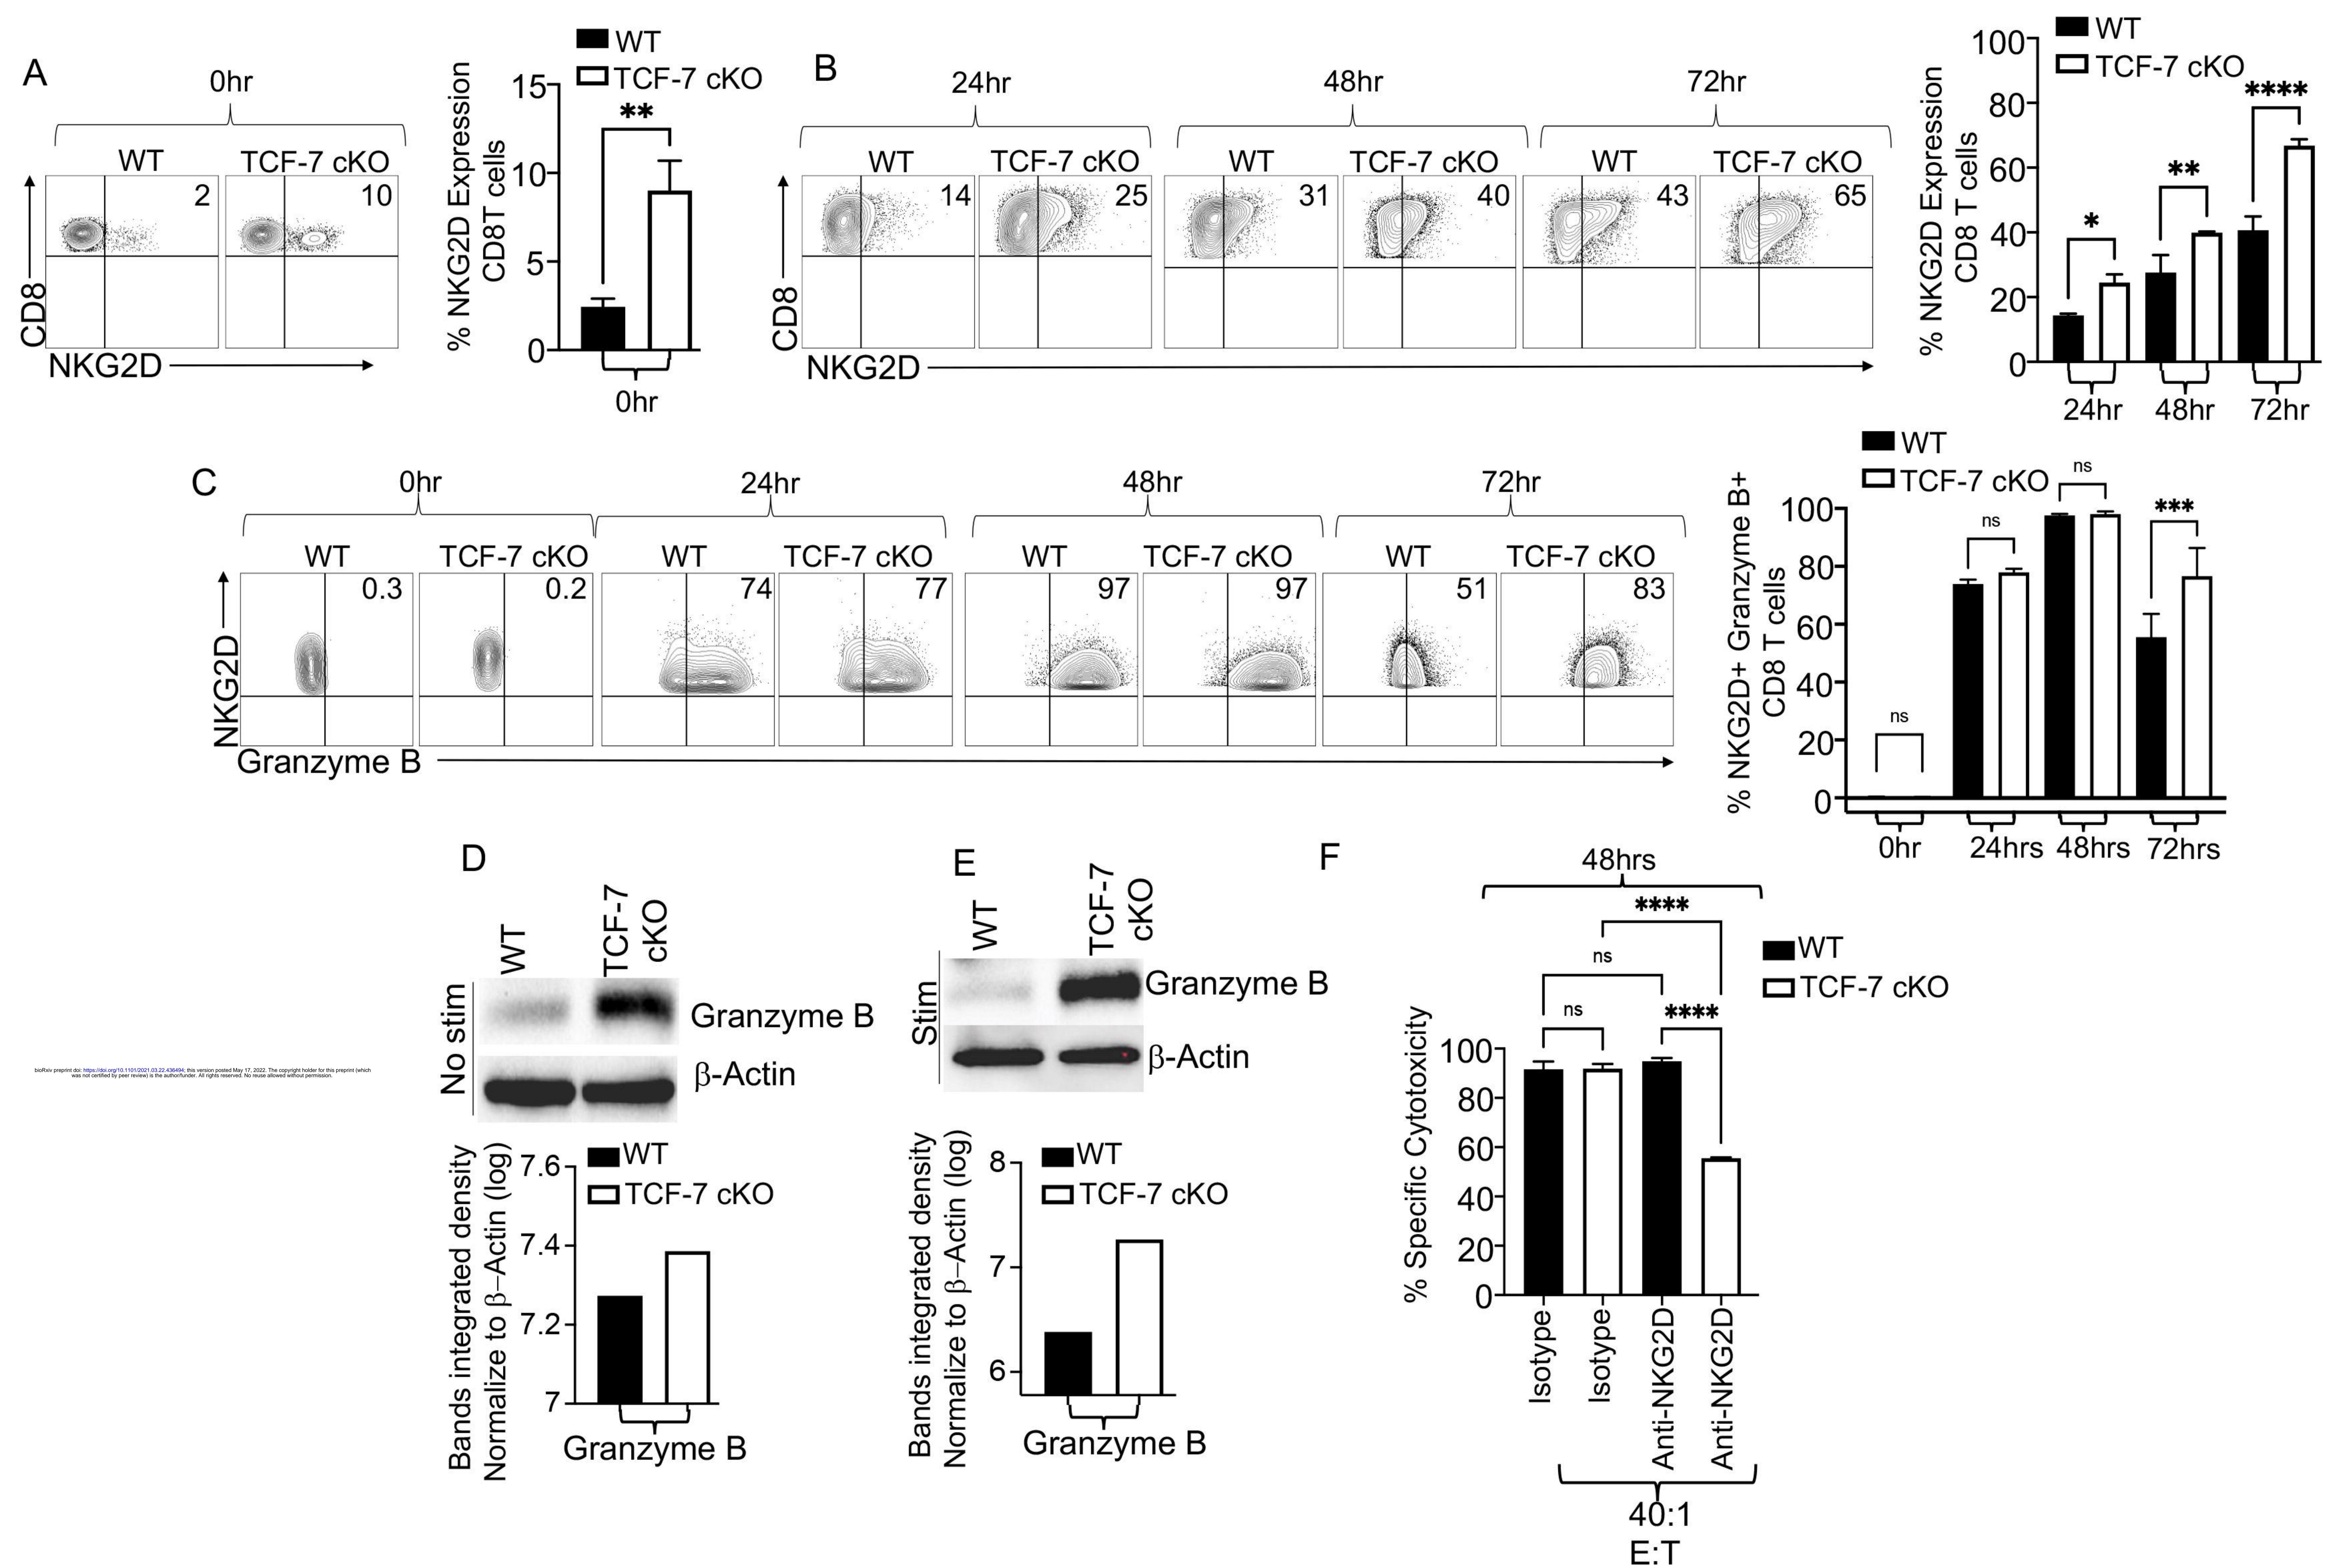

A

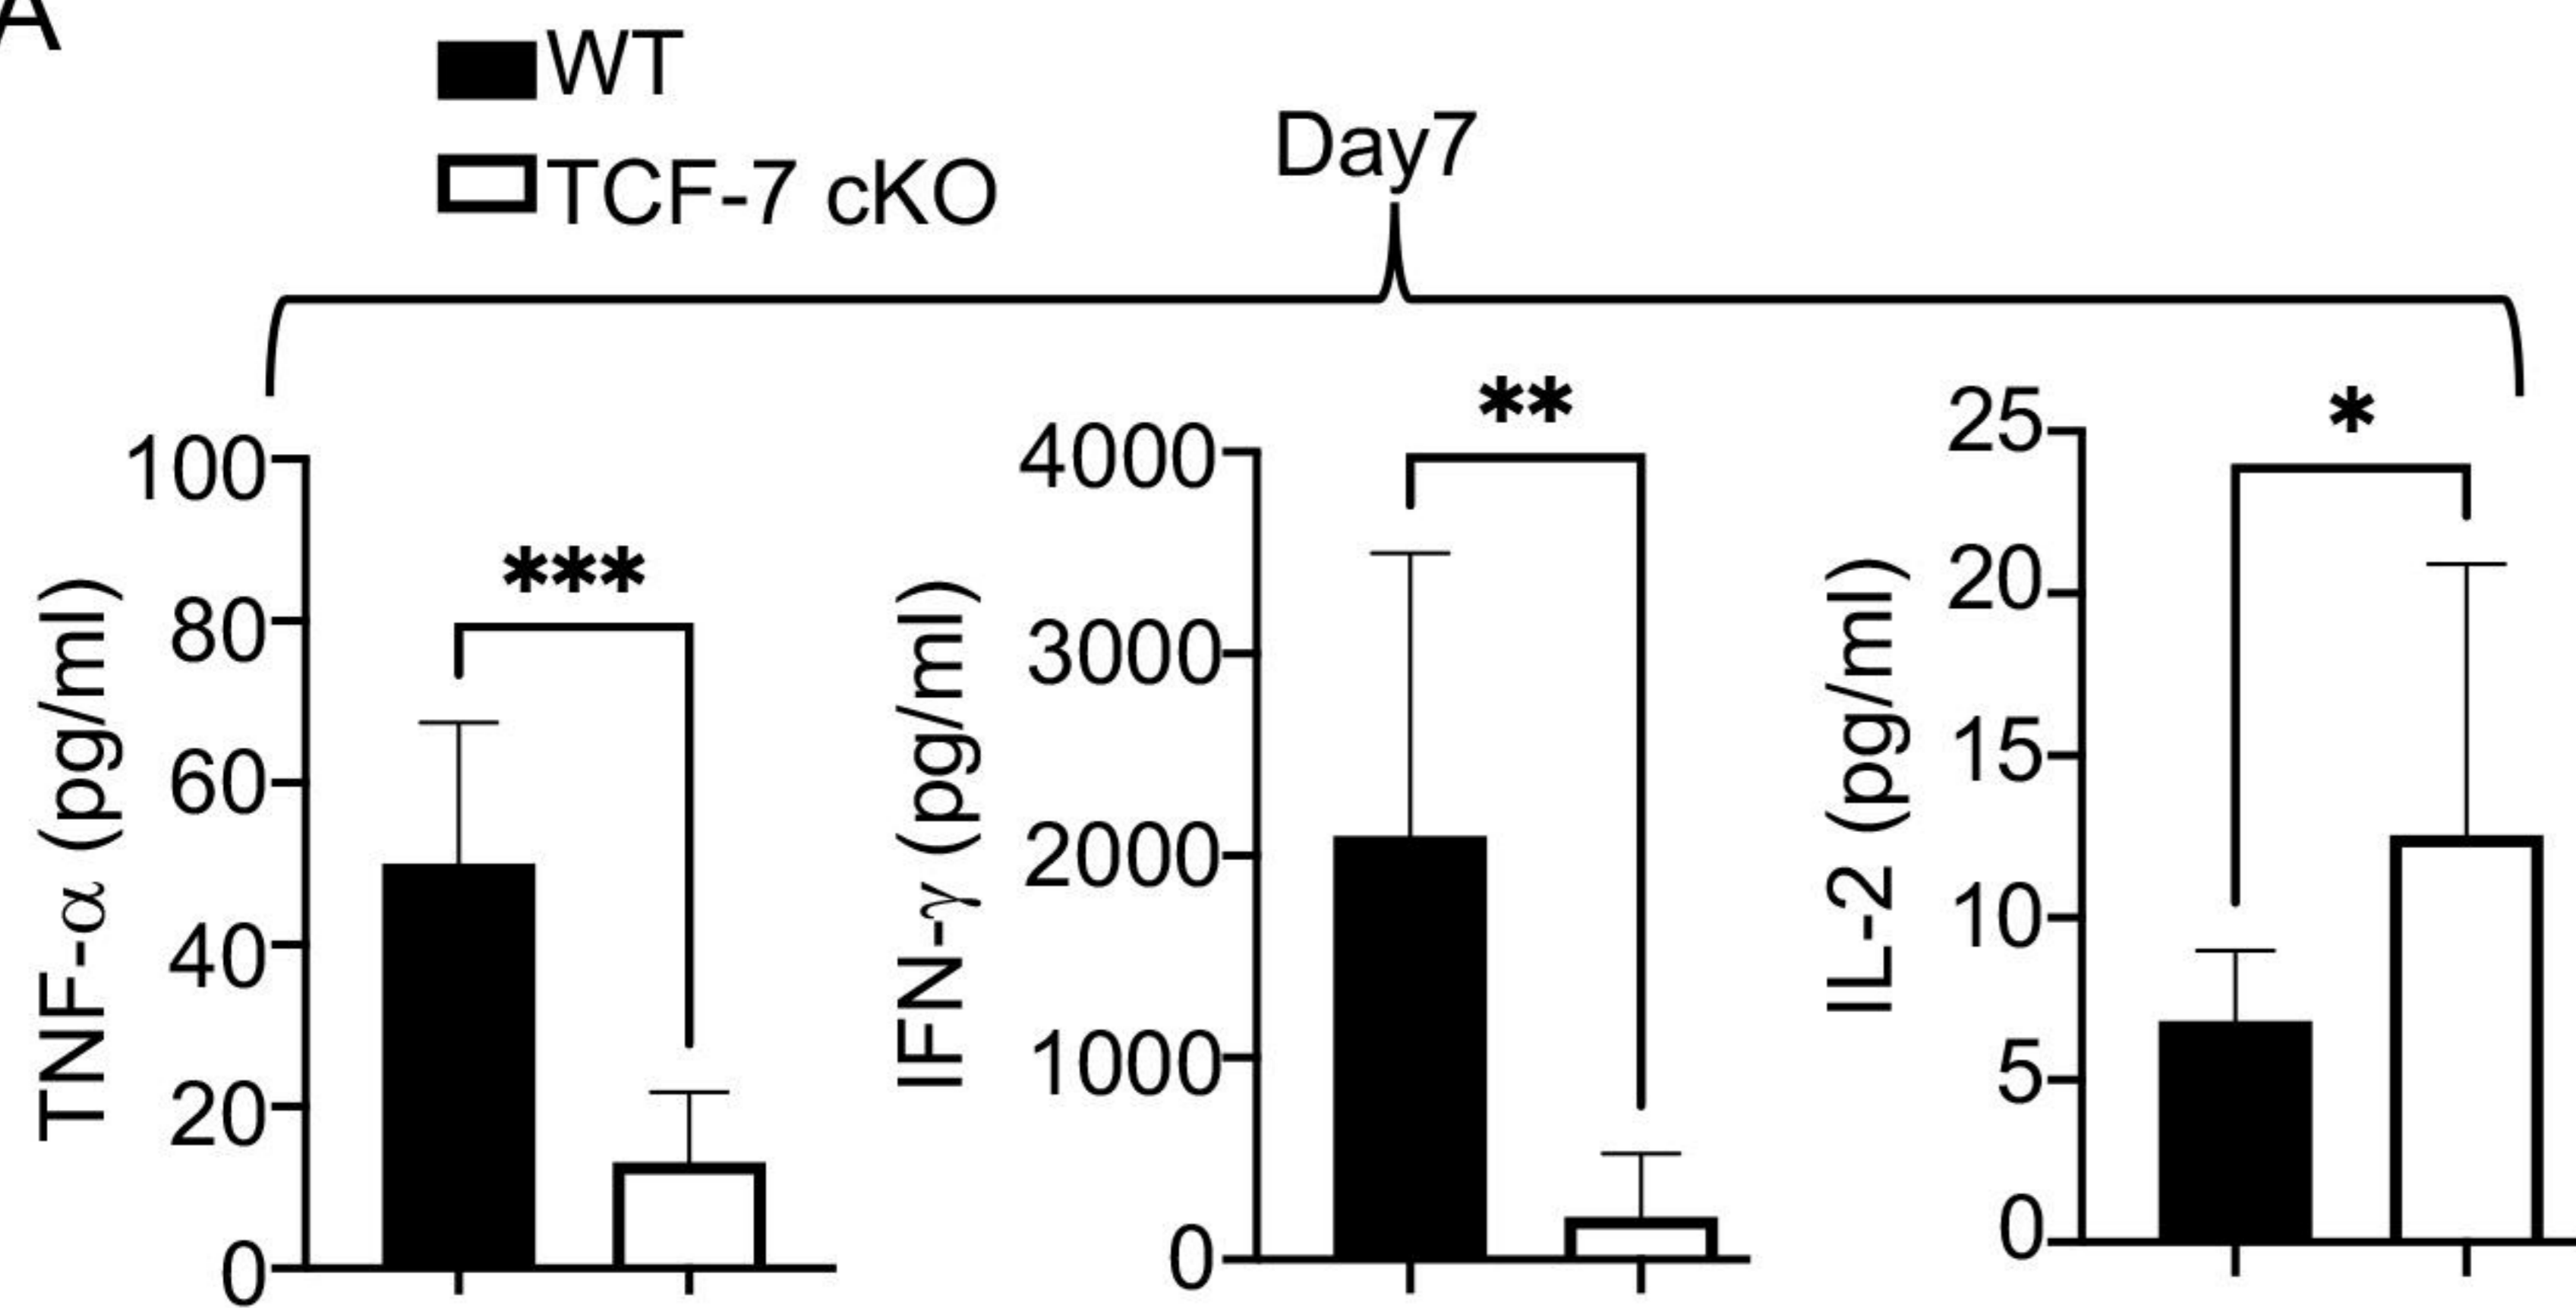

B

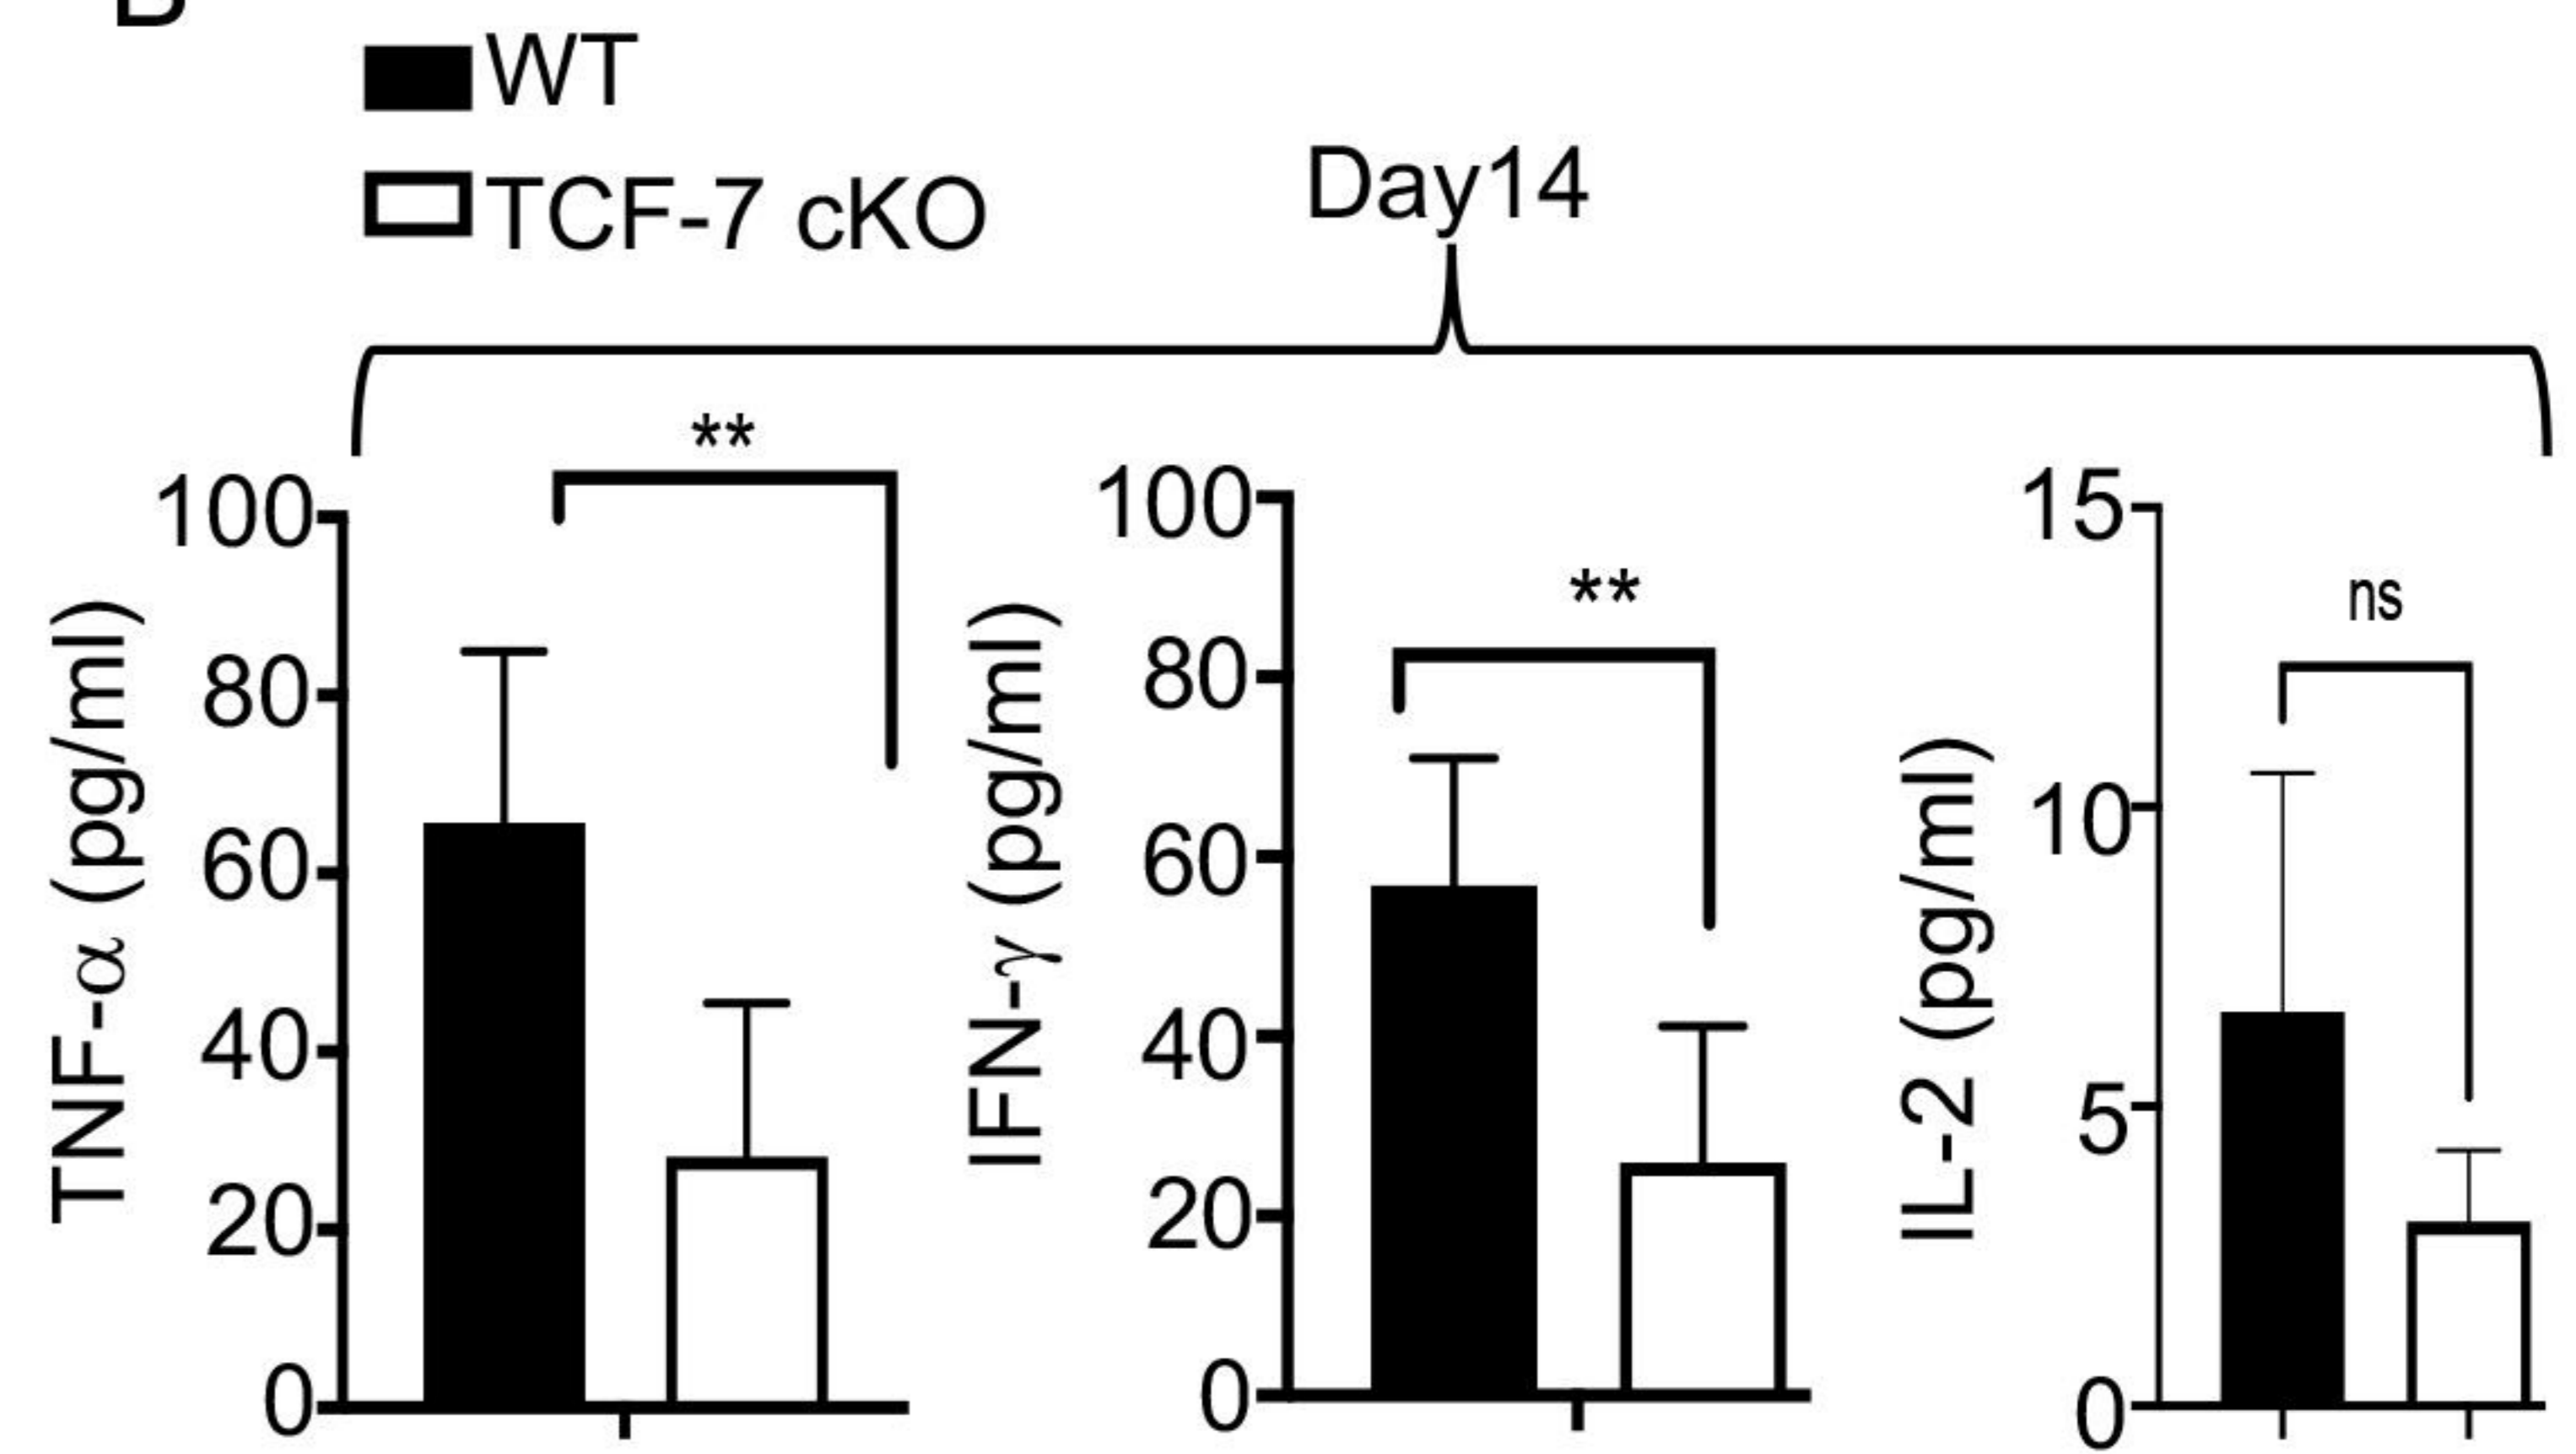

C

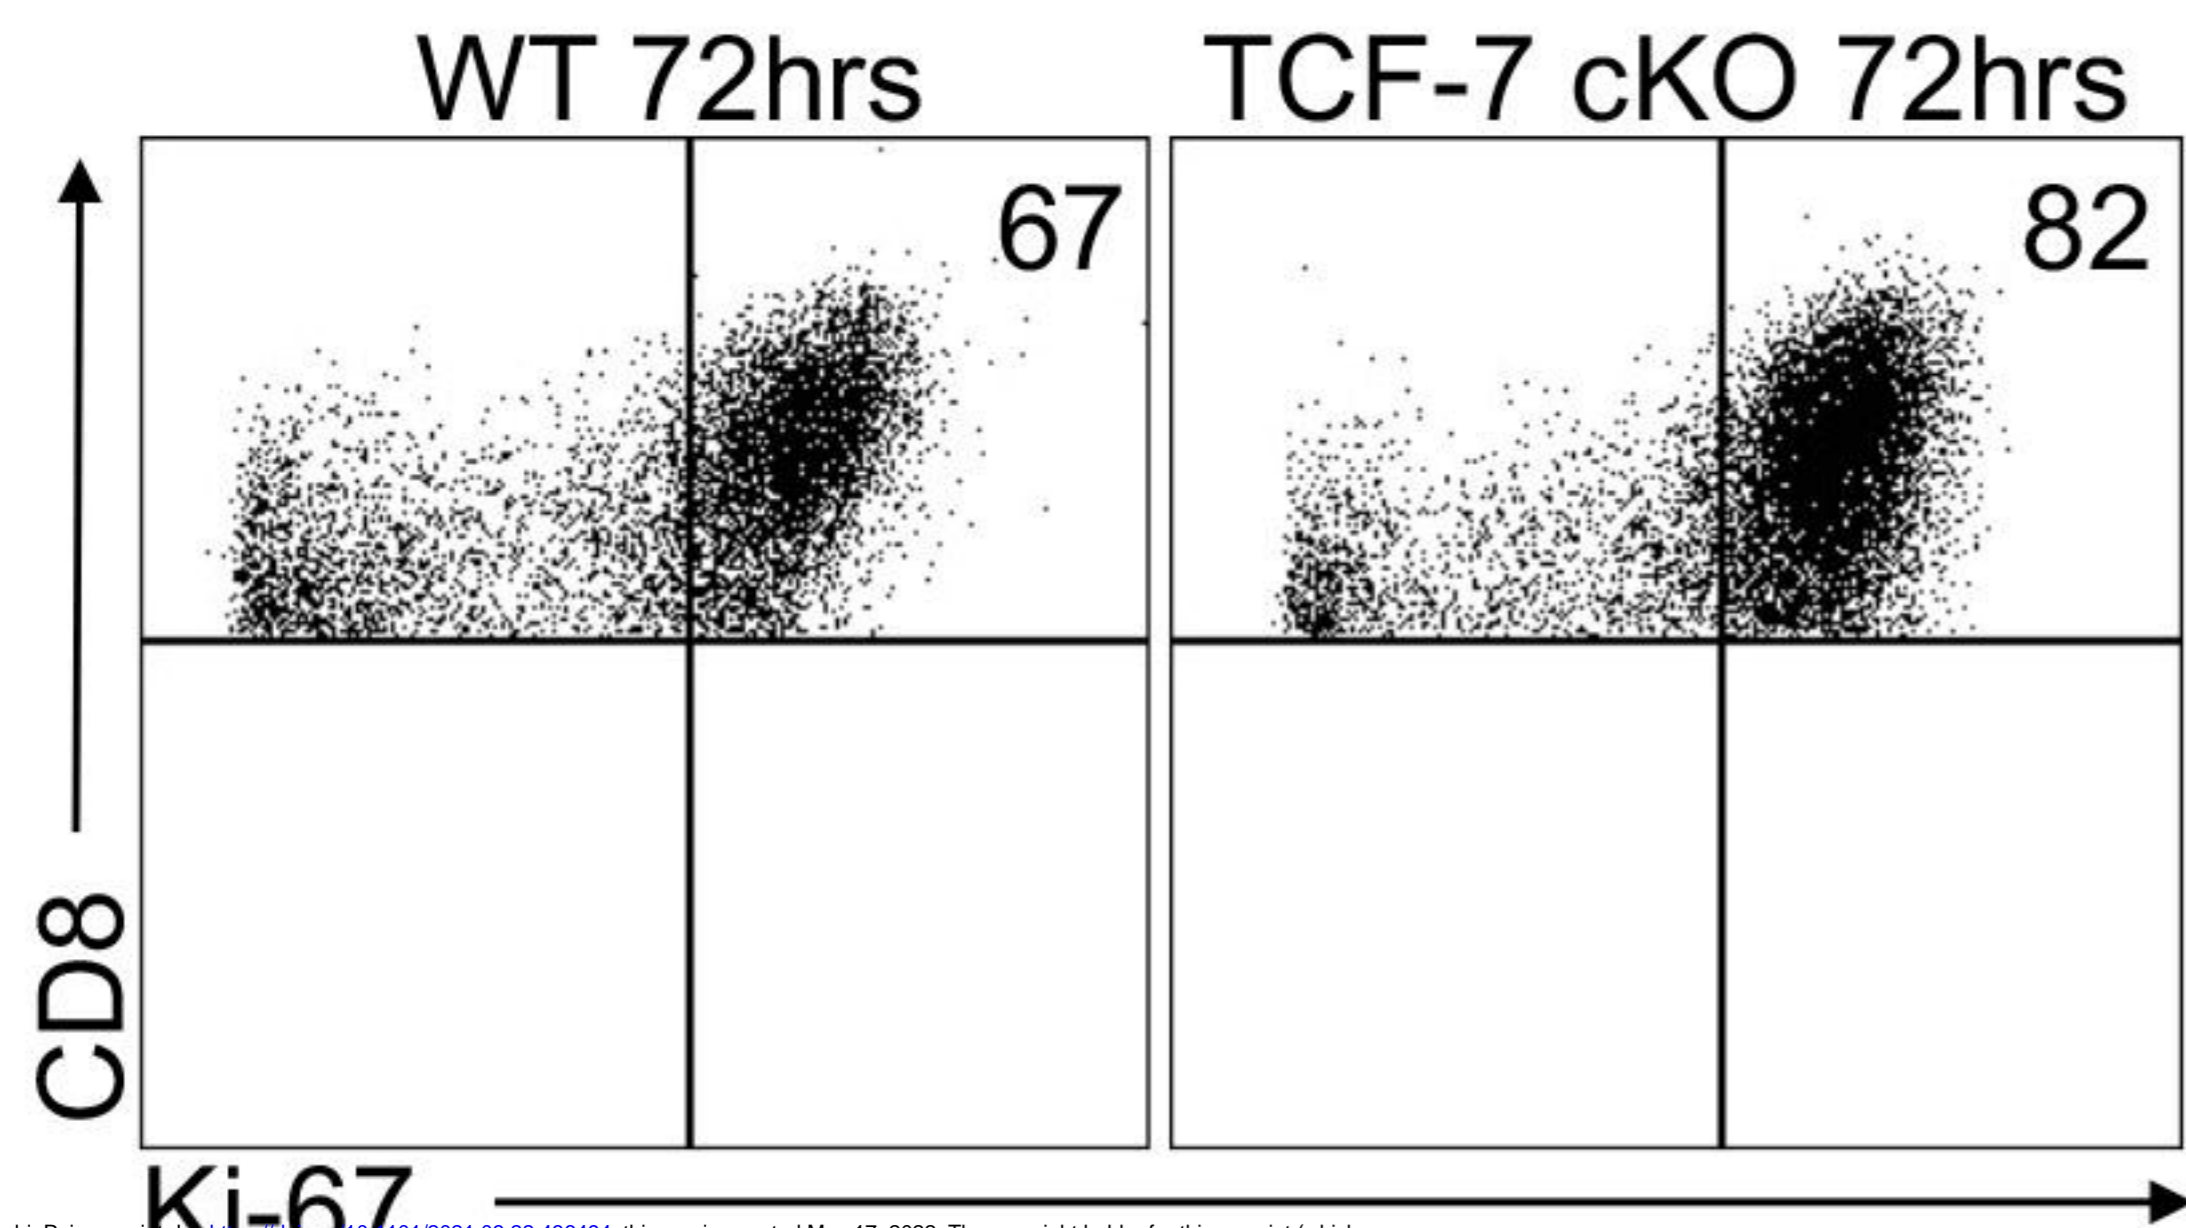

E

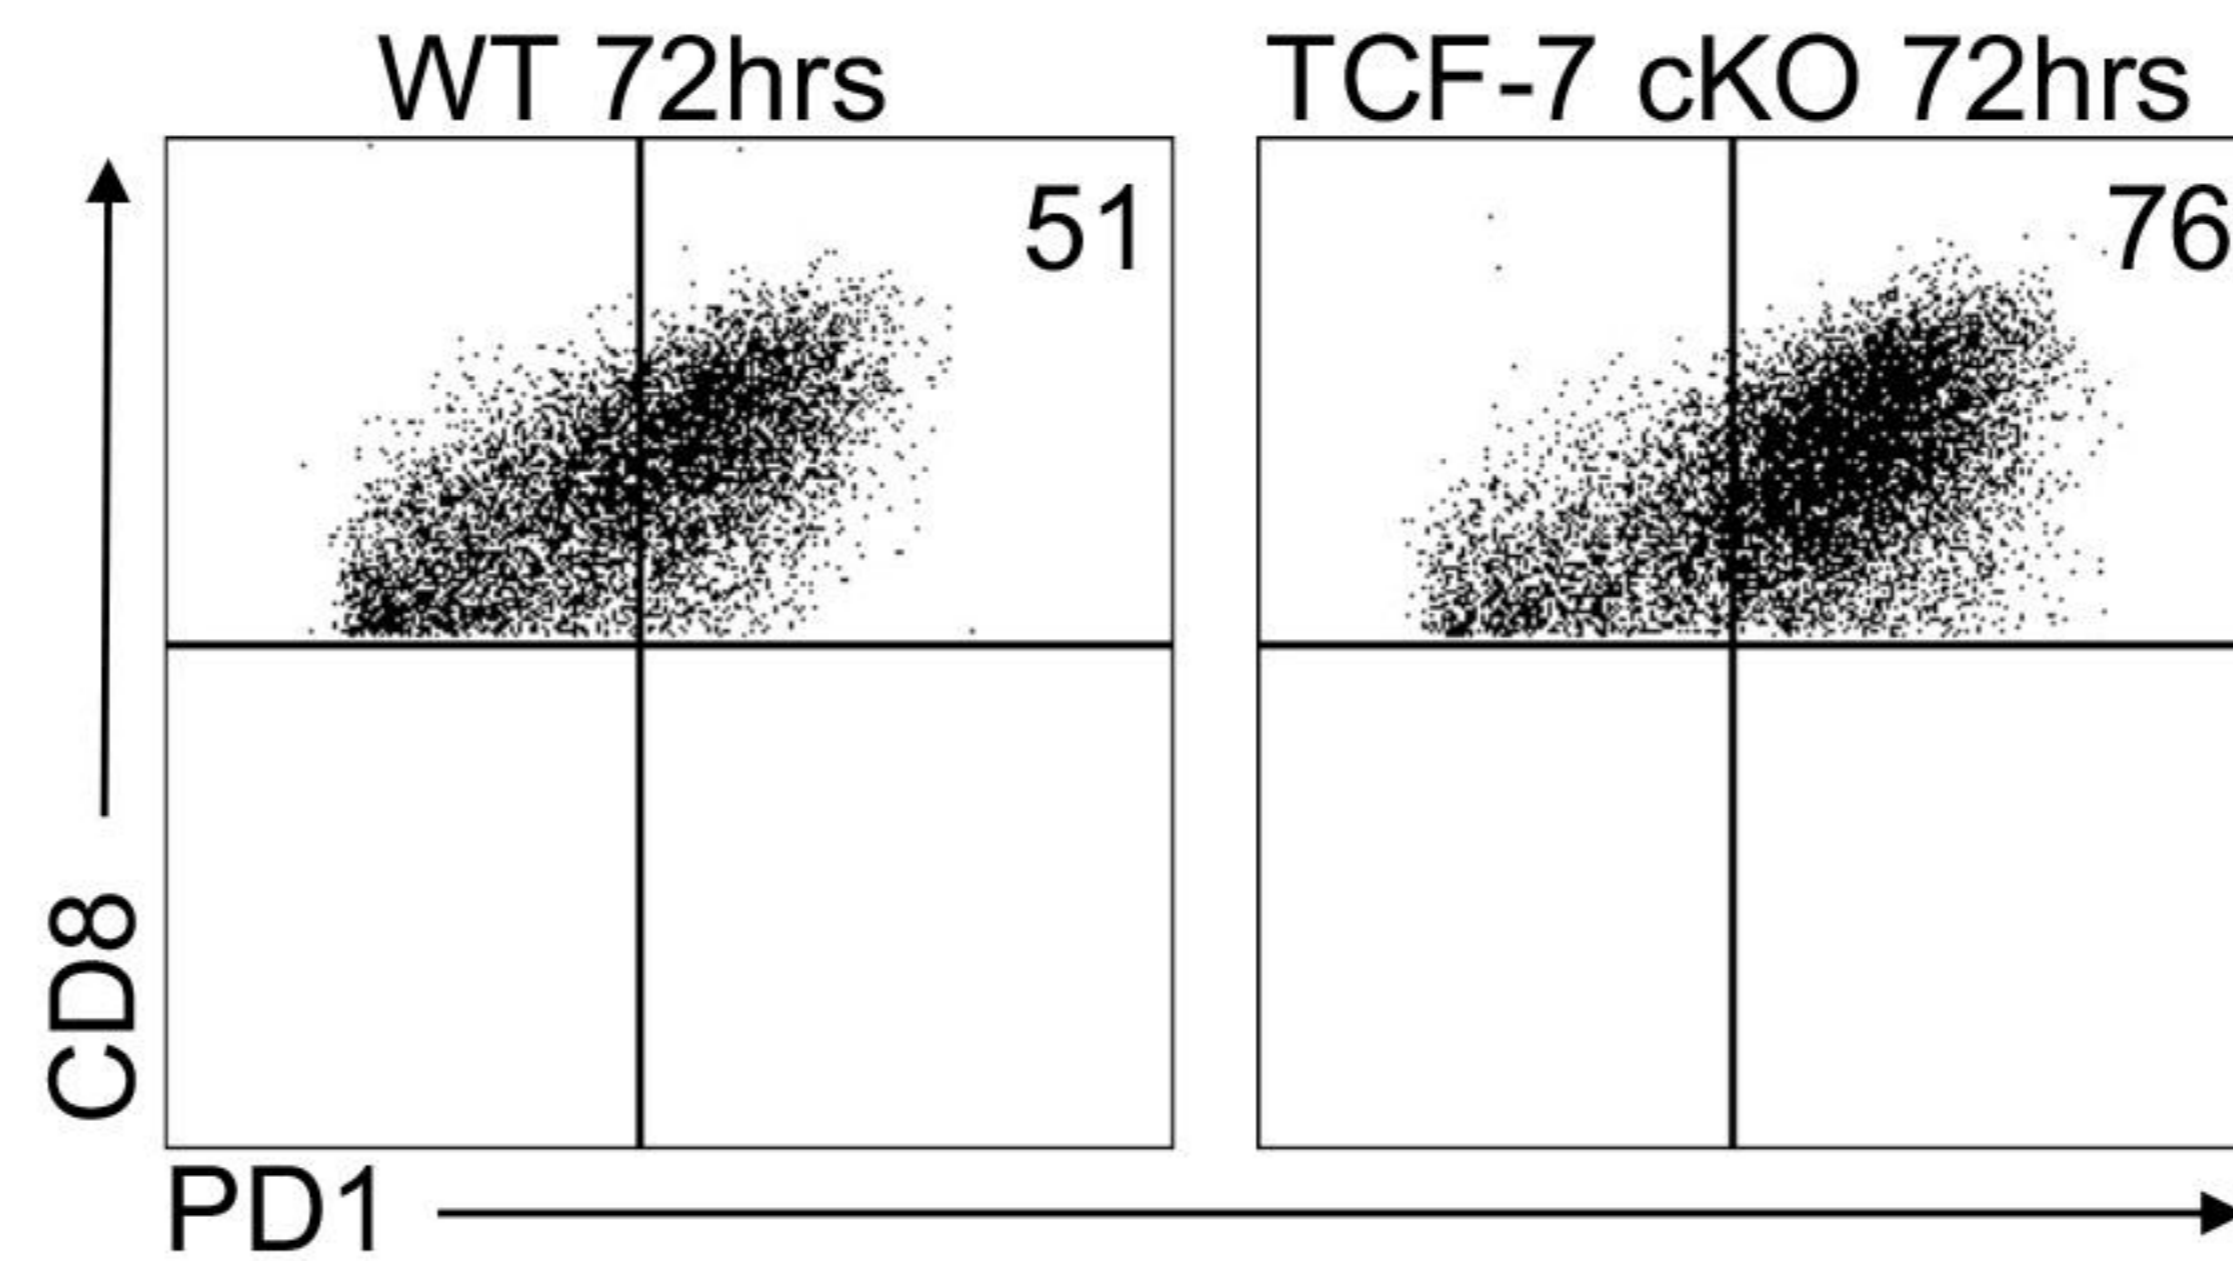

G

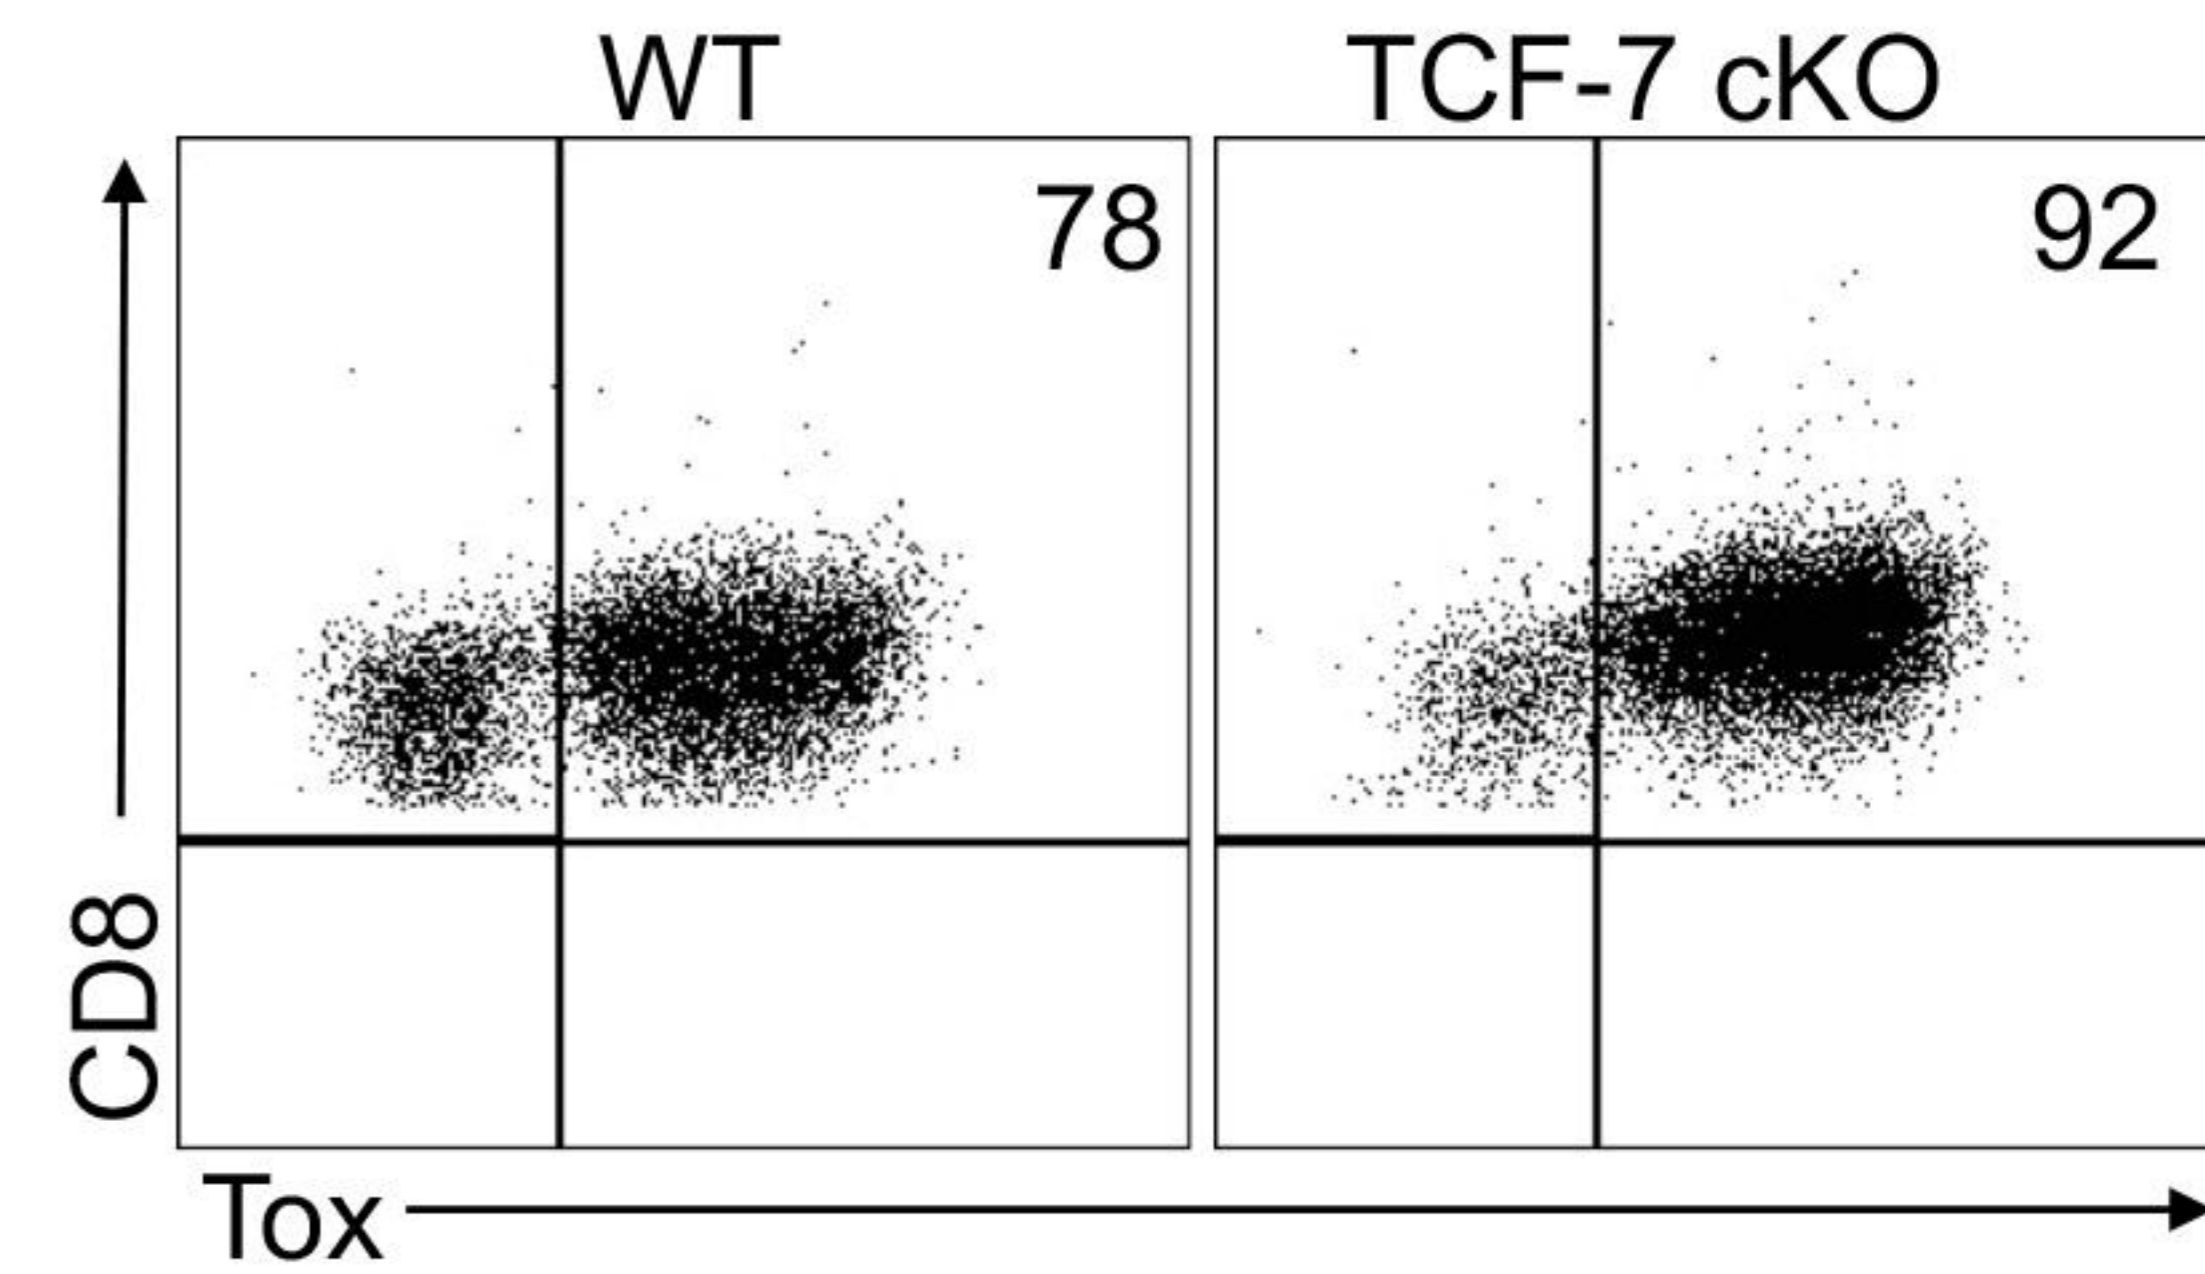

D

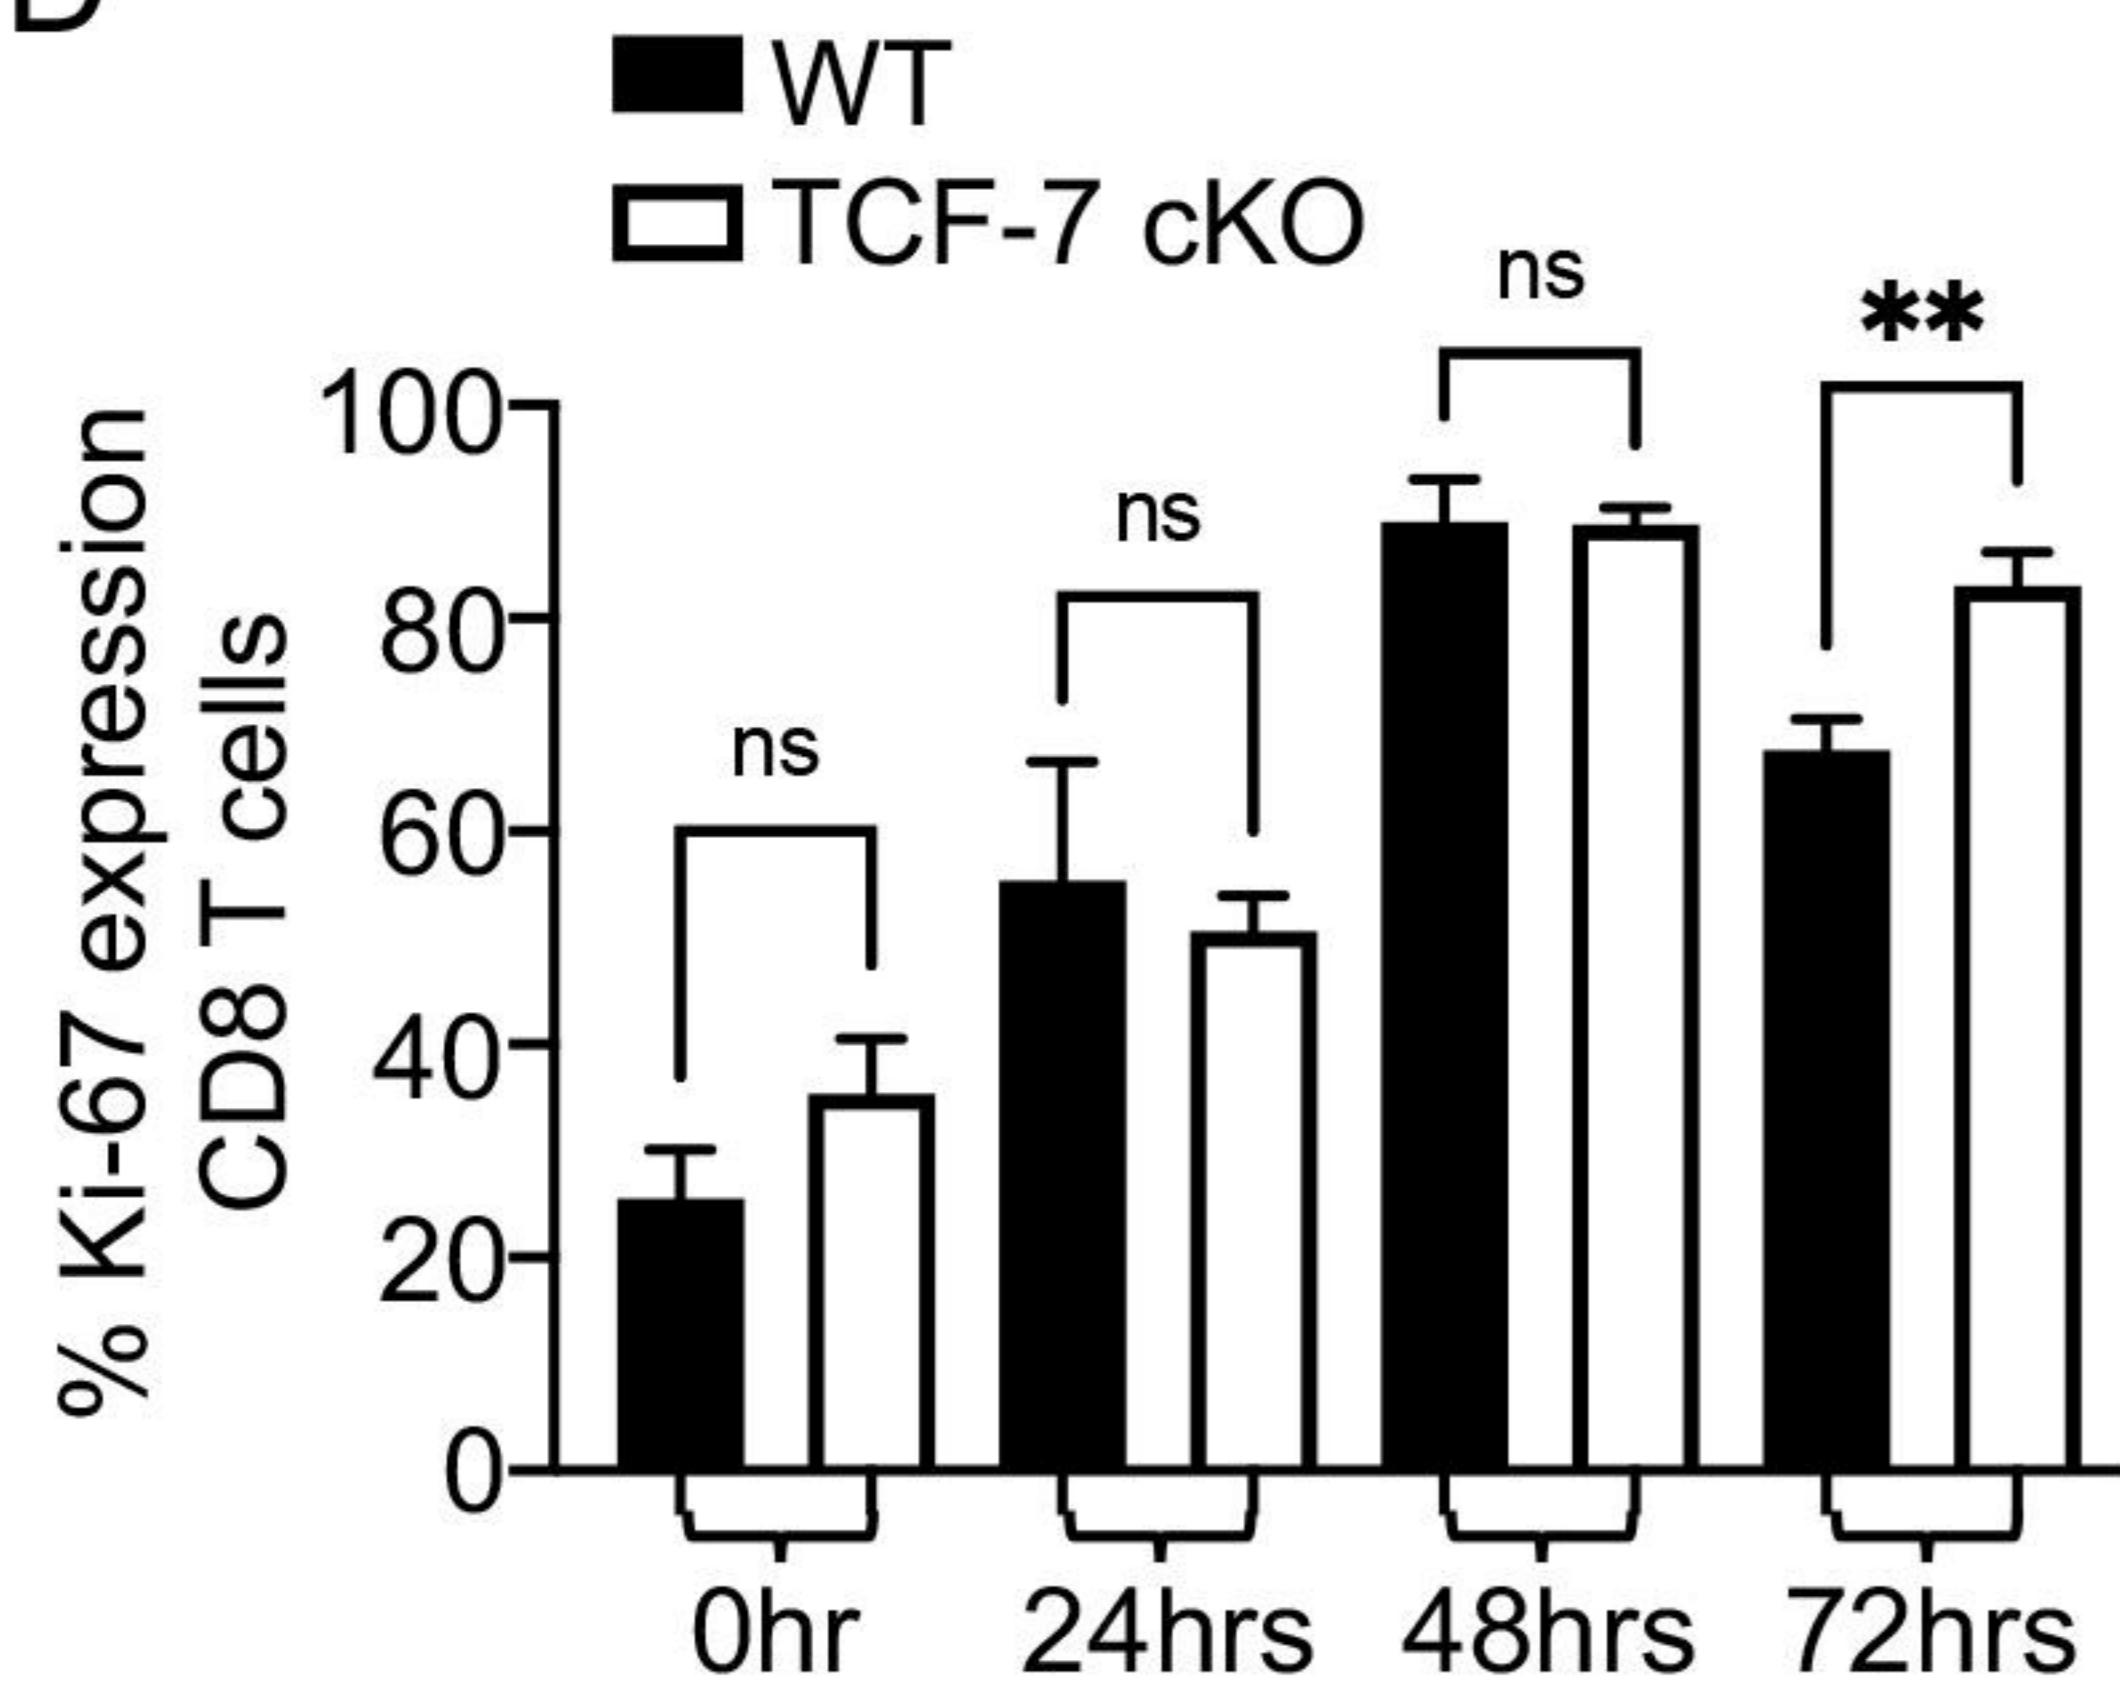

F

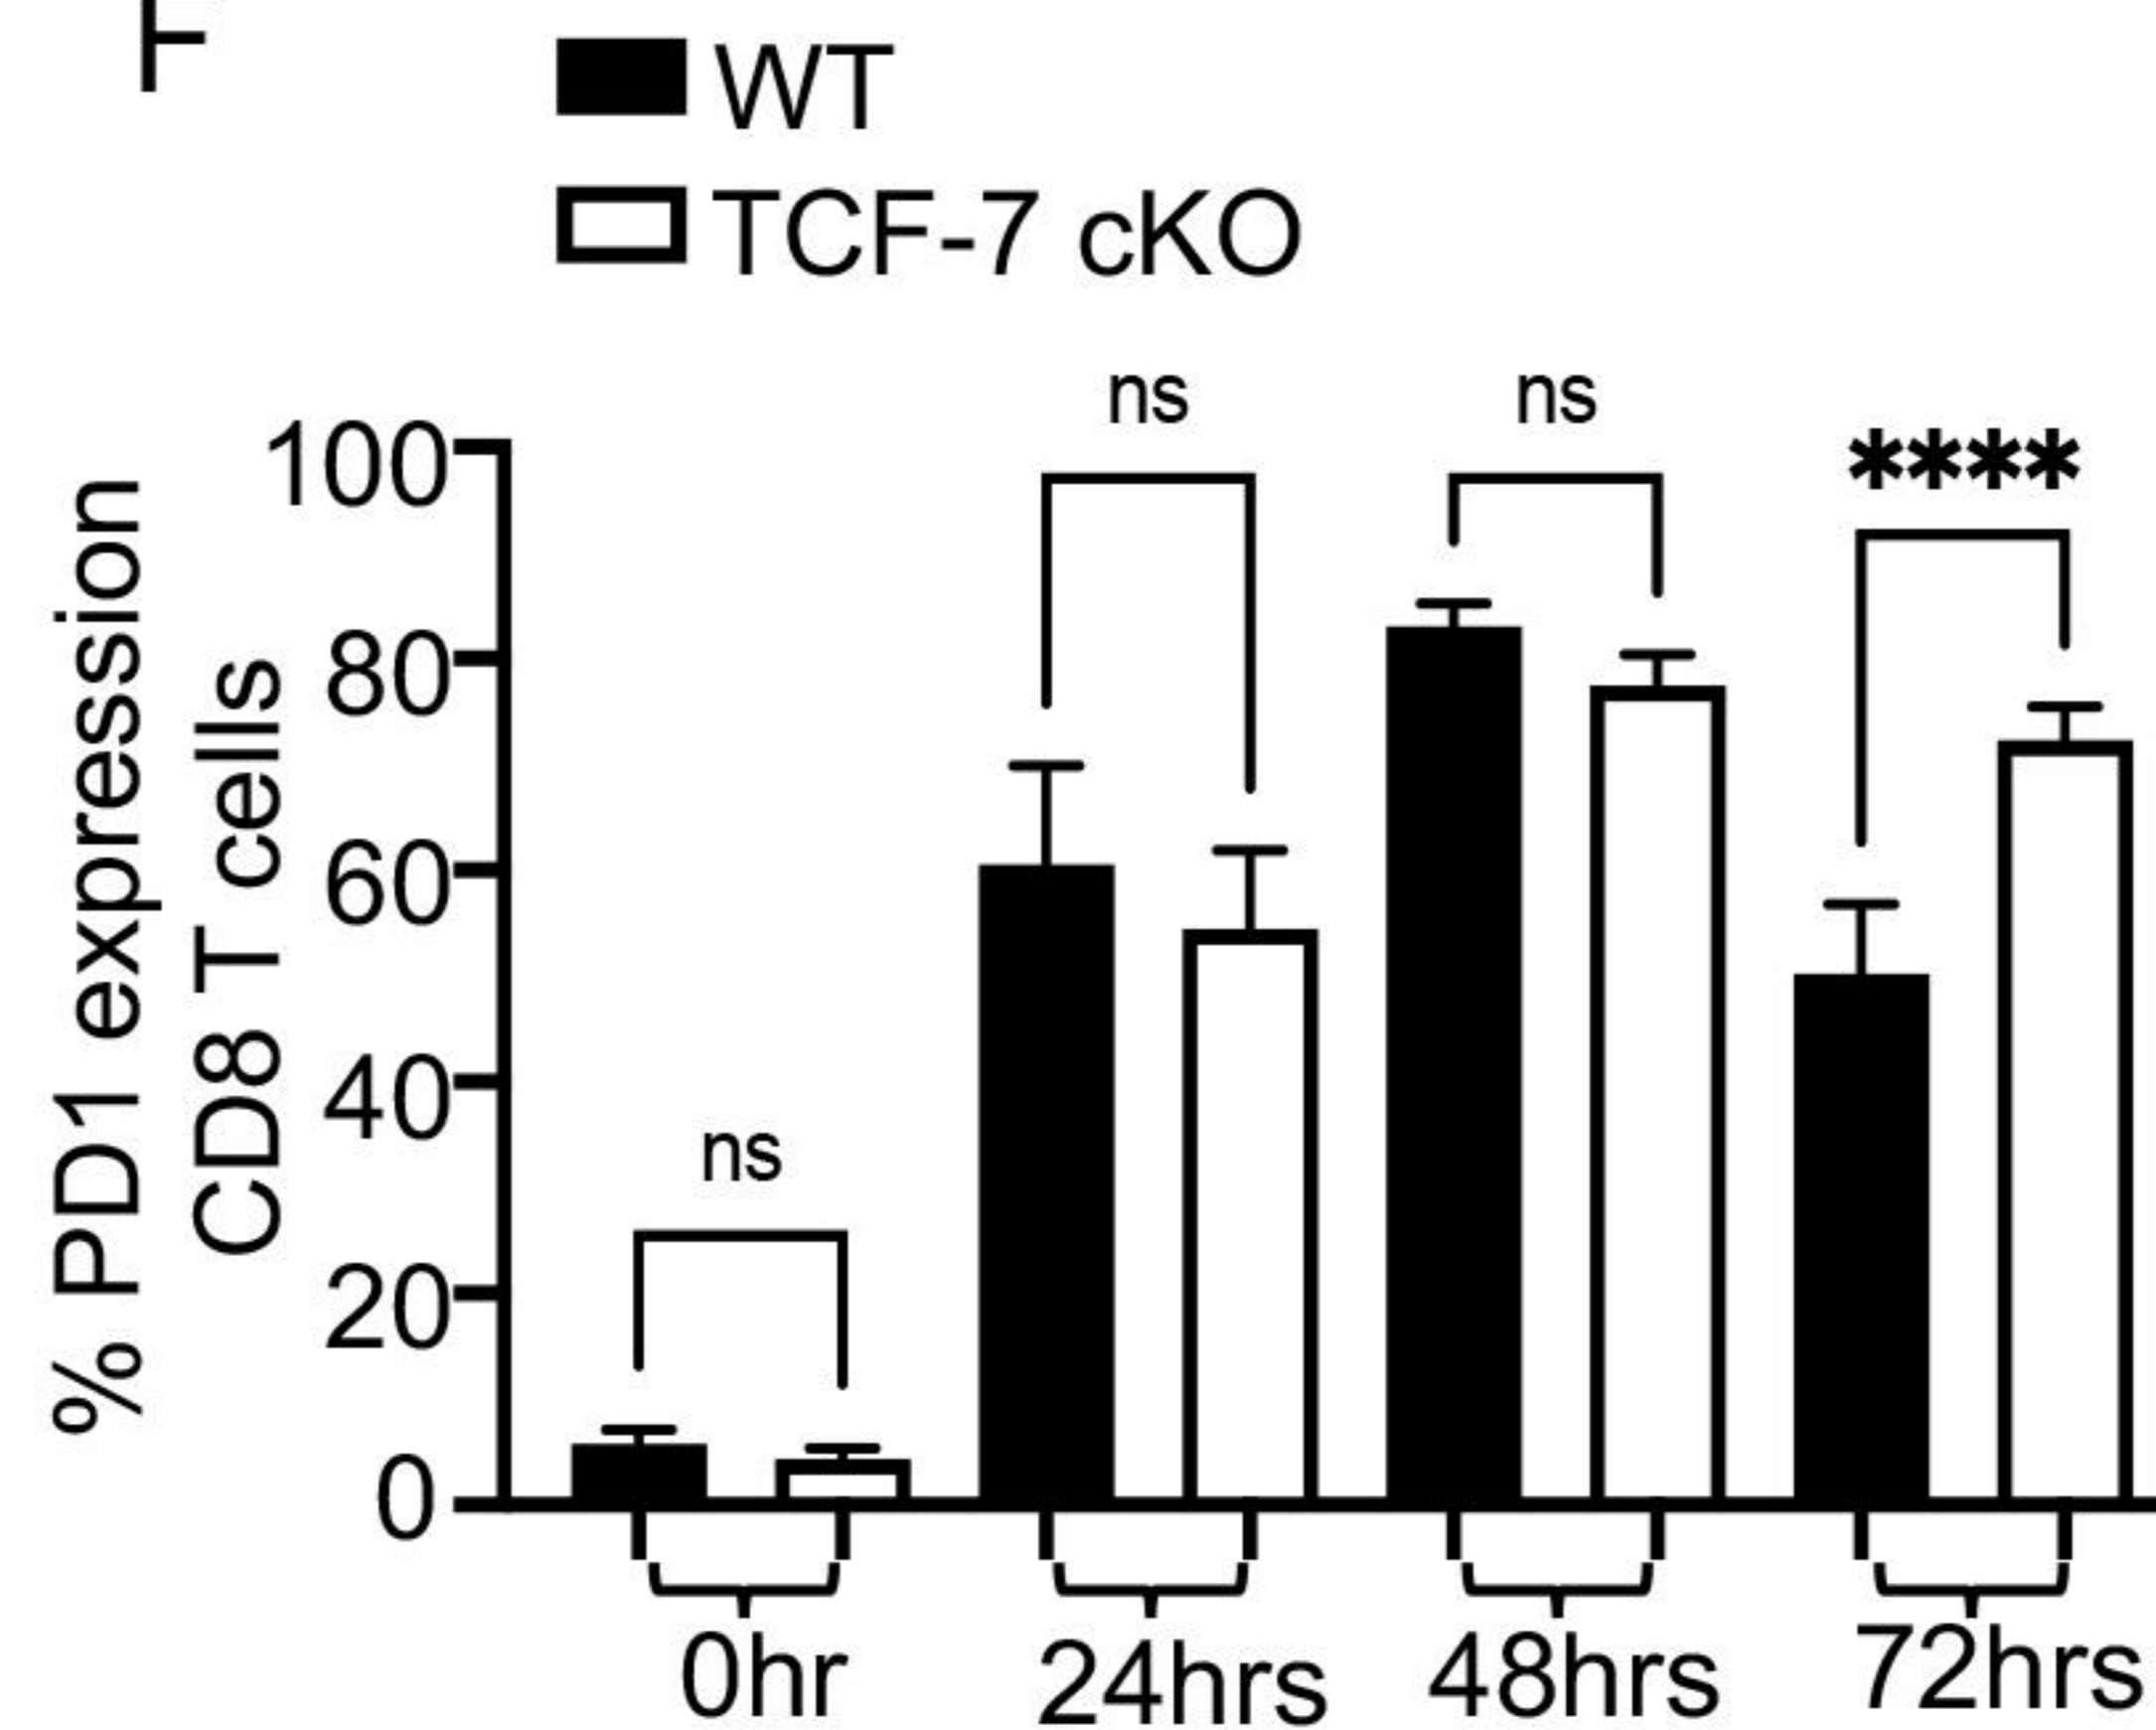

H

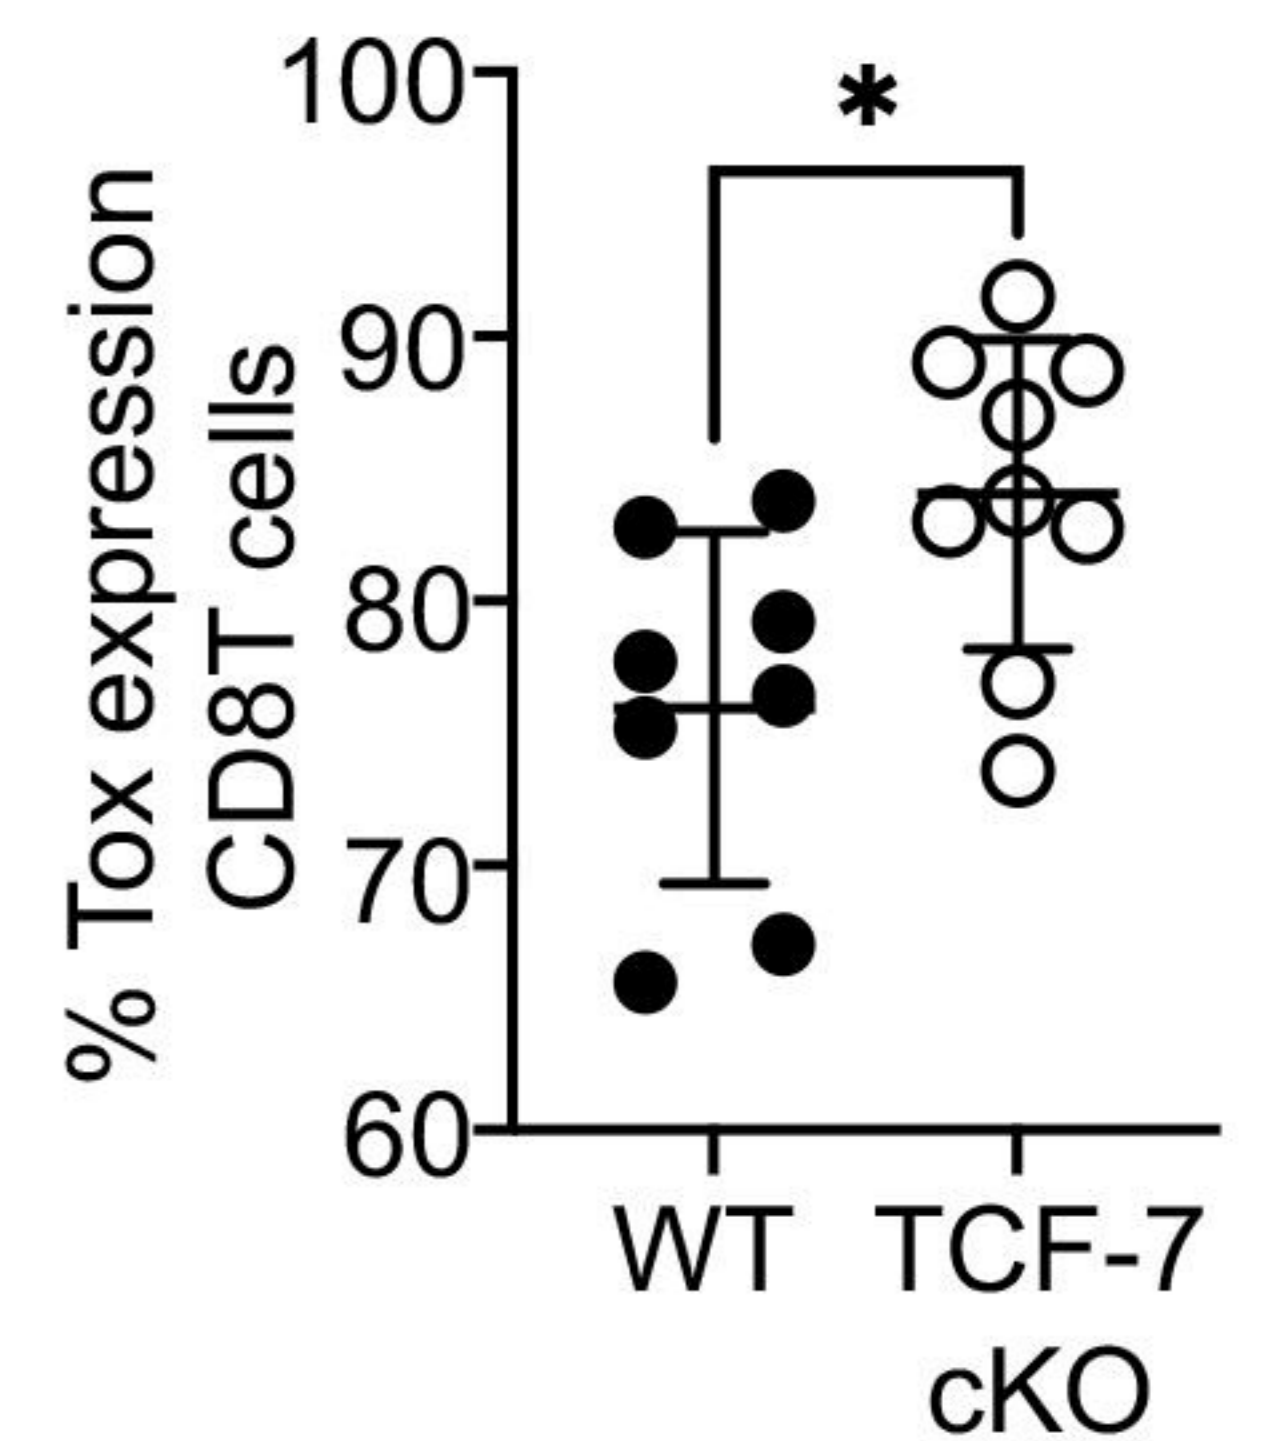



Day 7 Post Transplant

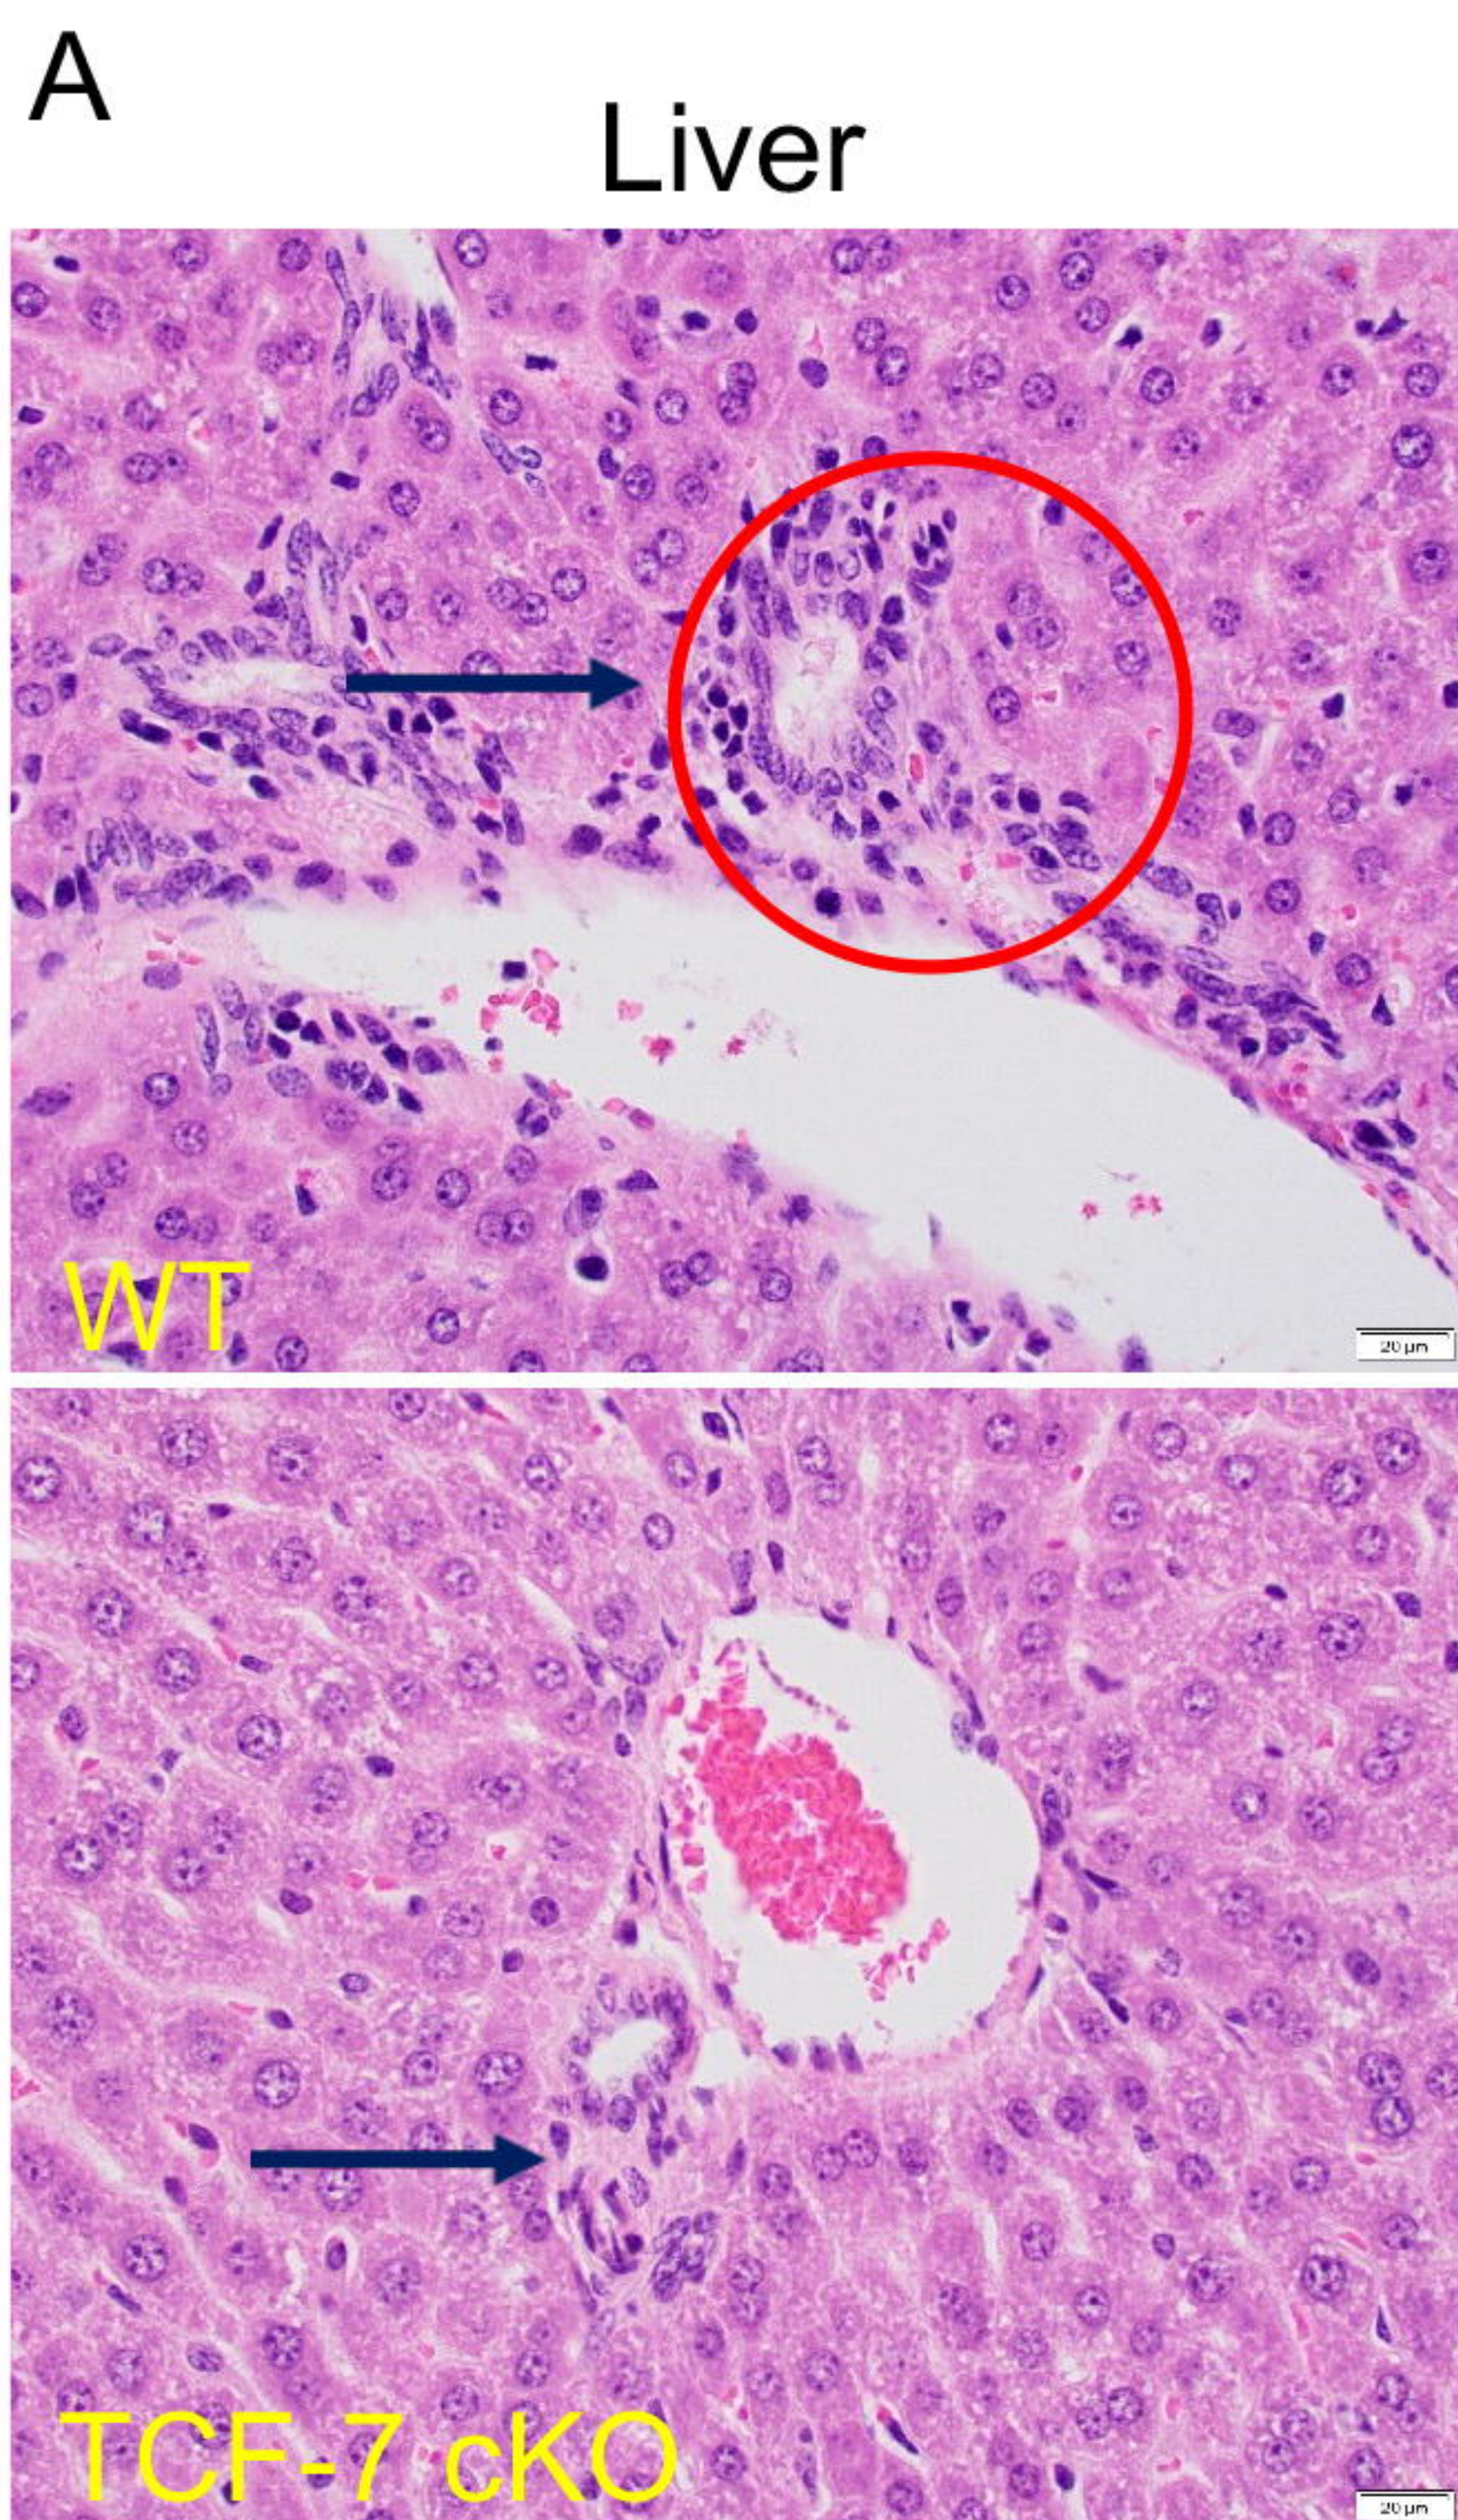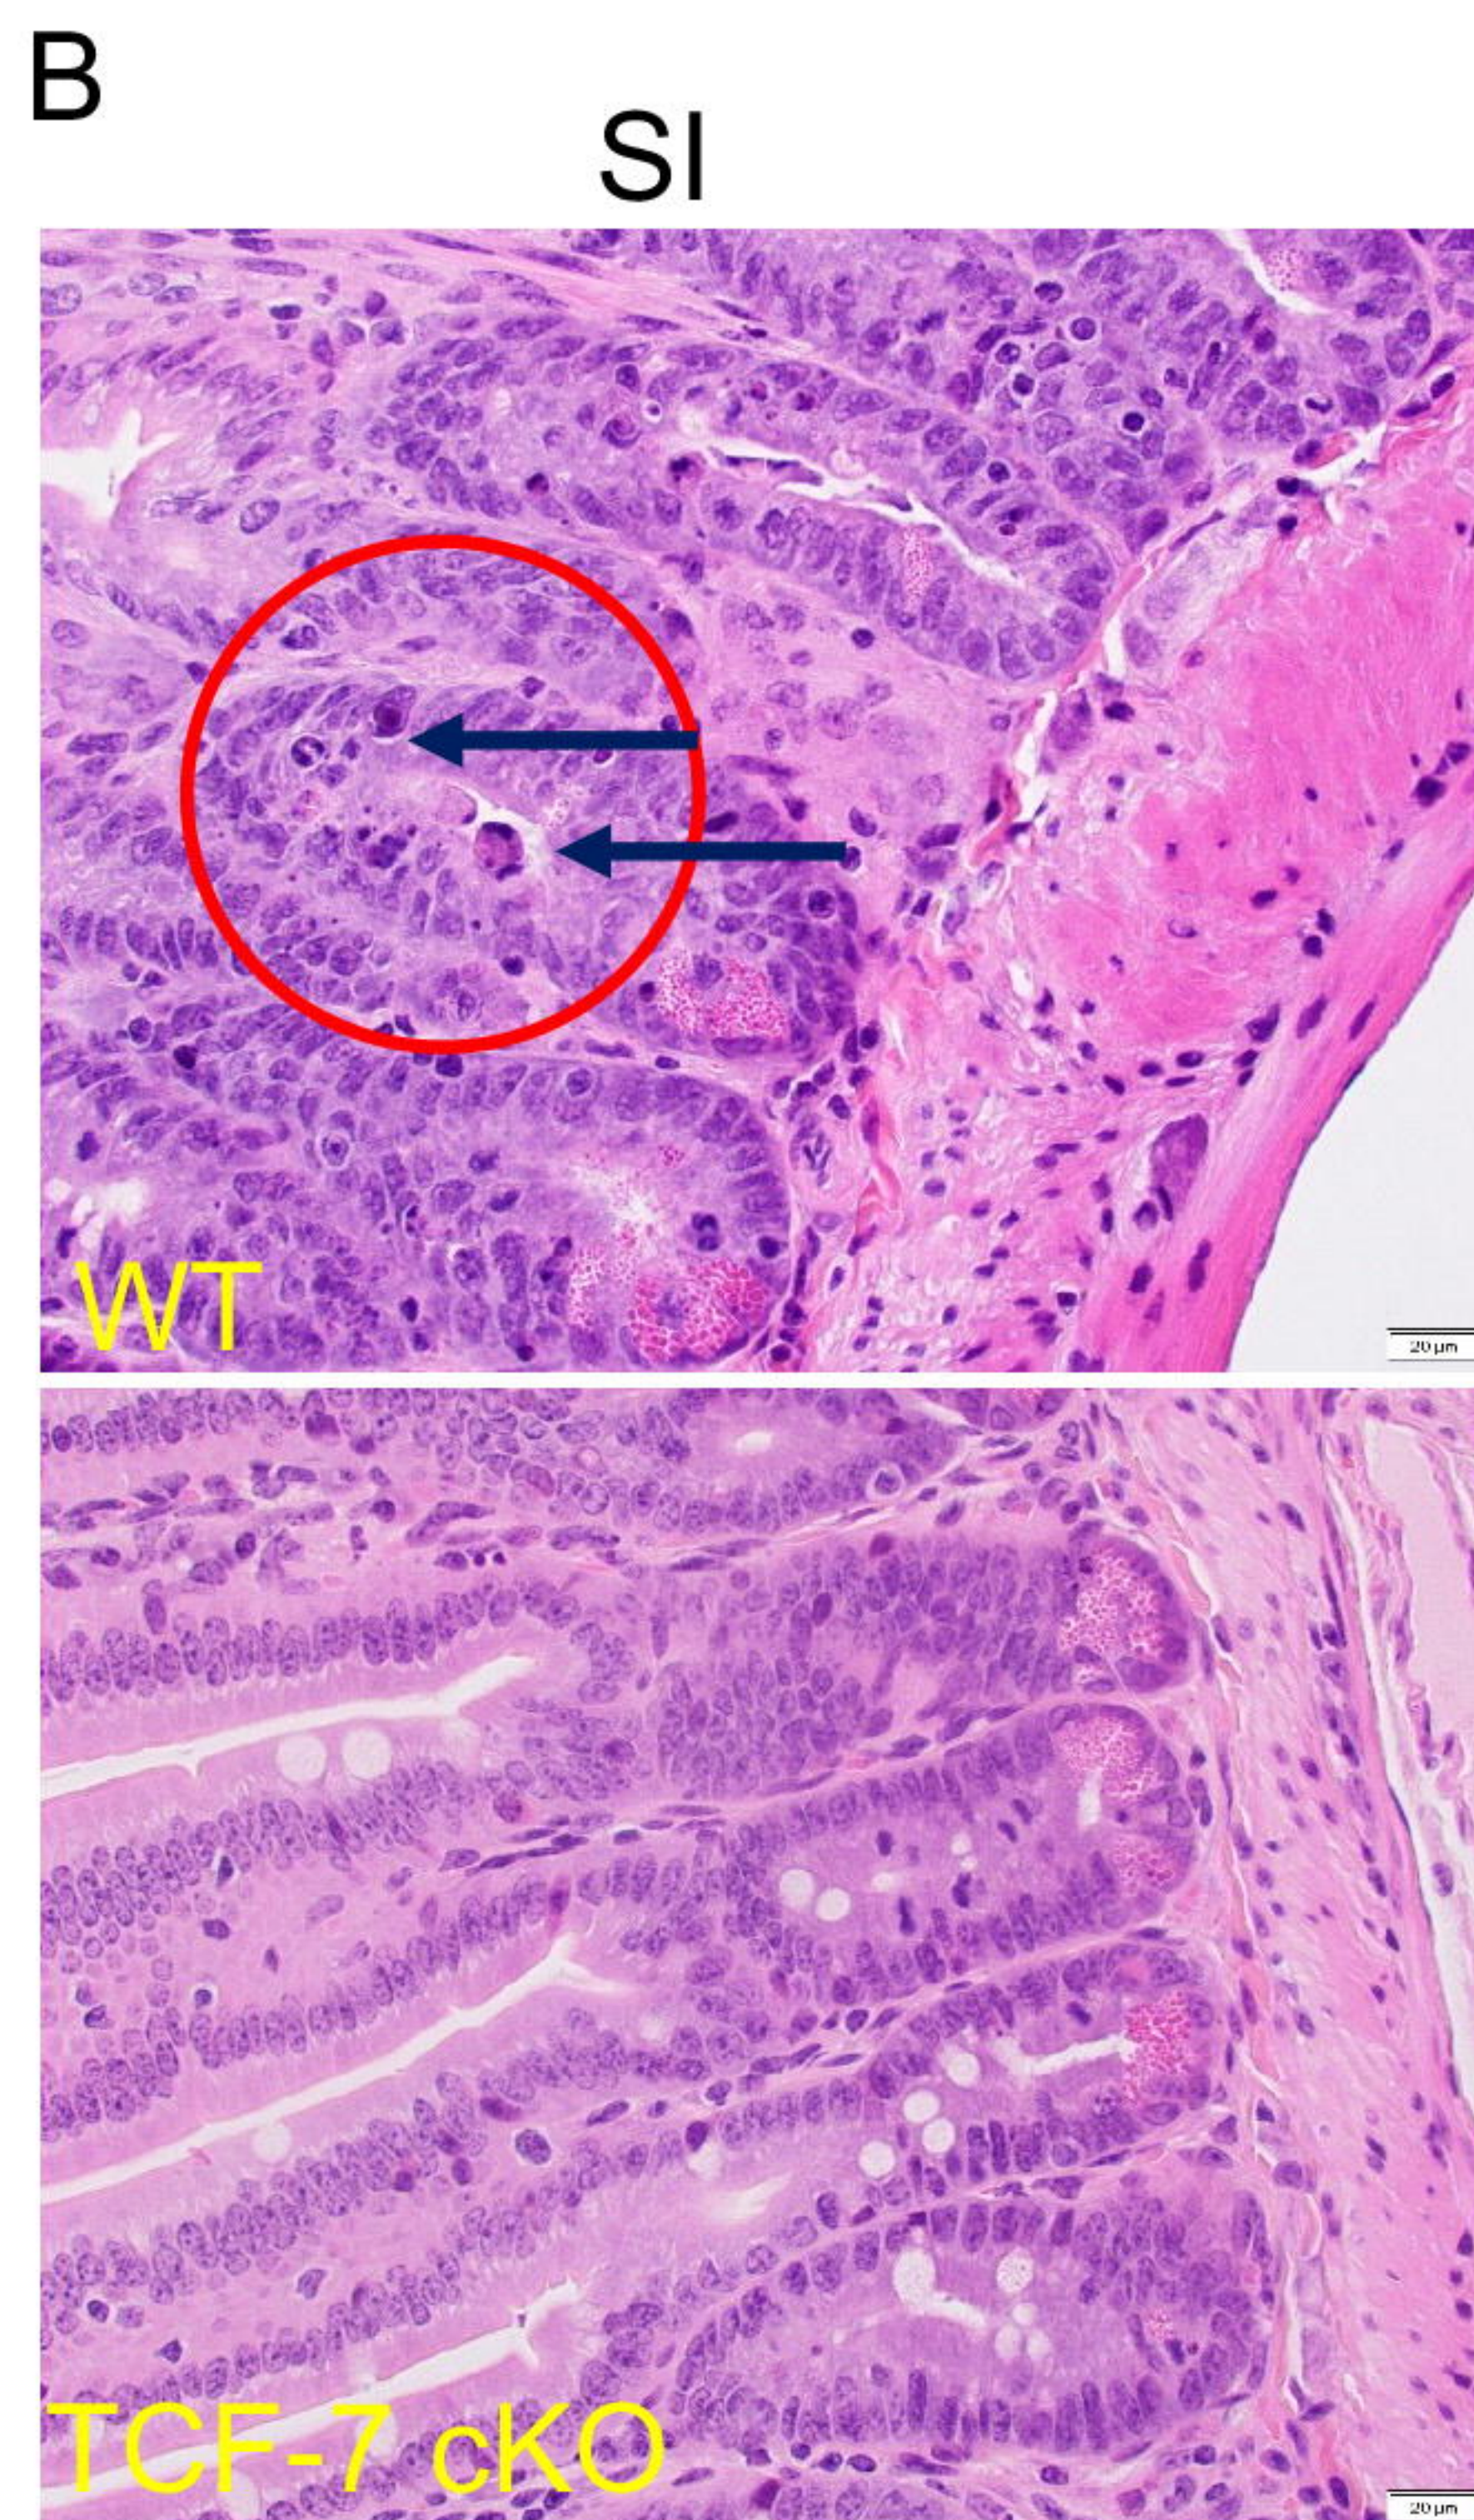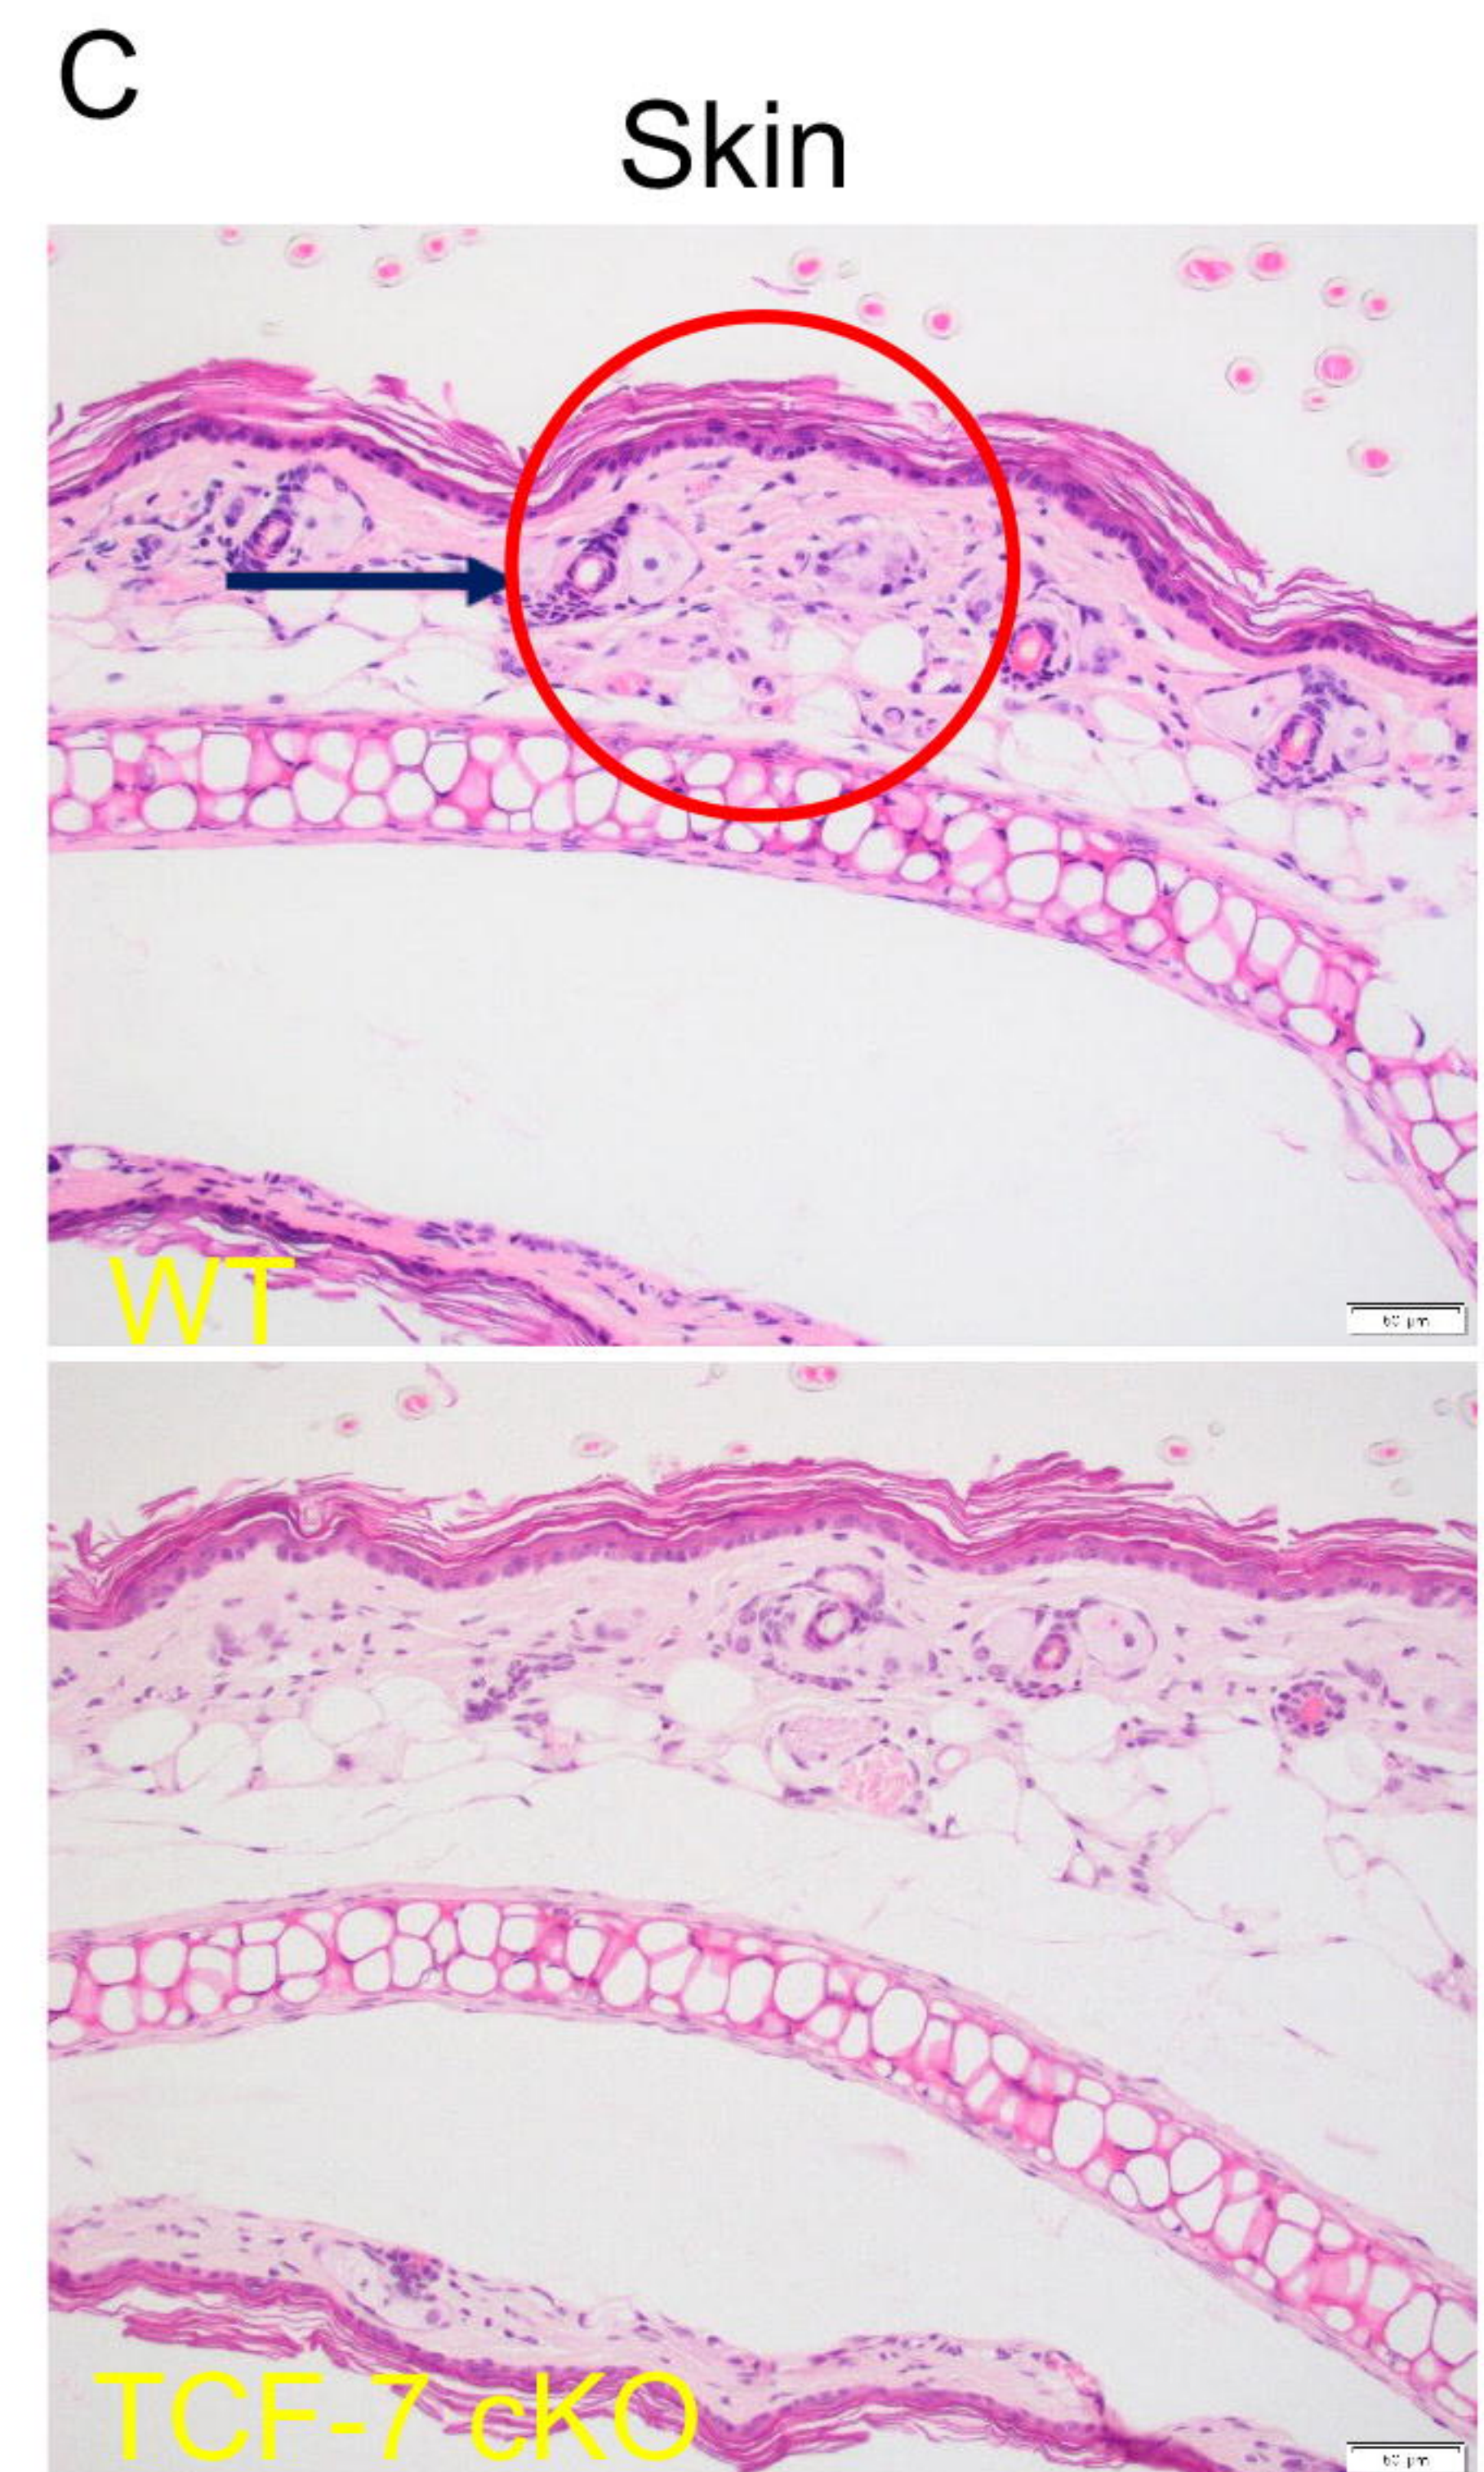

Day 21 Post Transplant

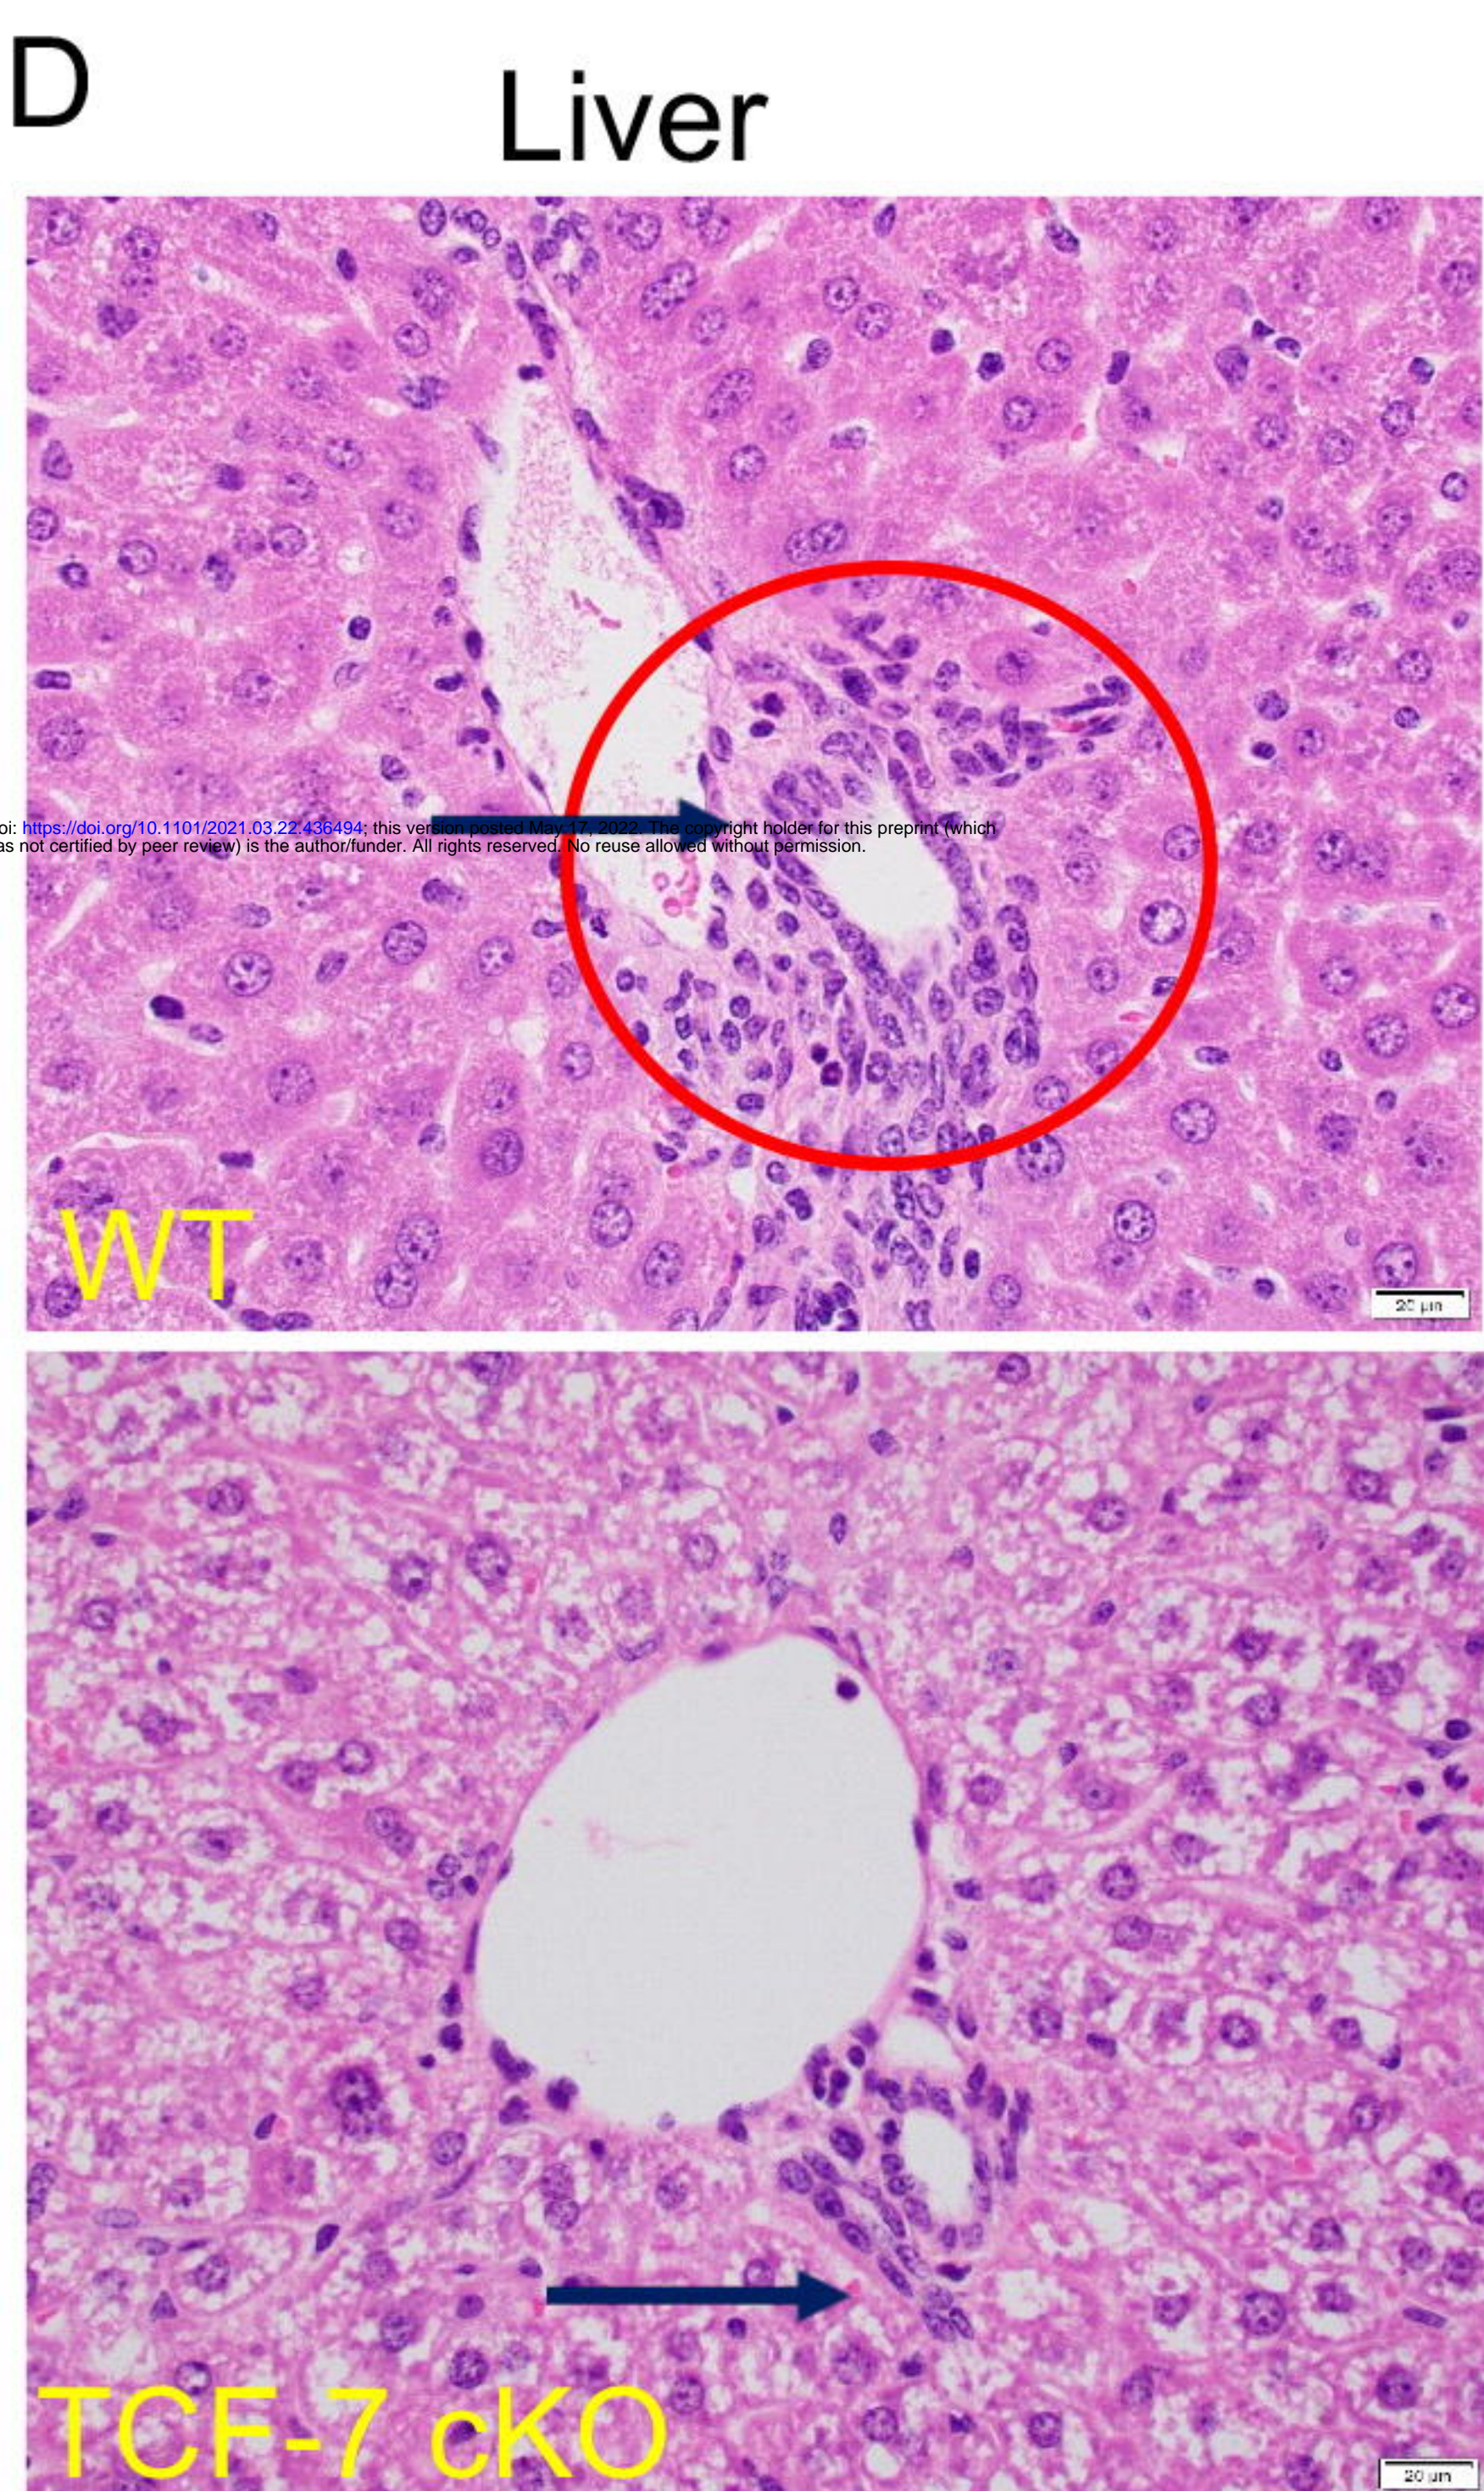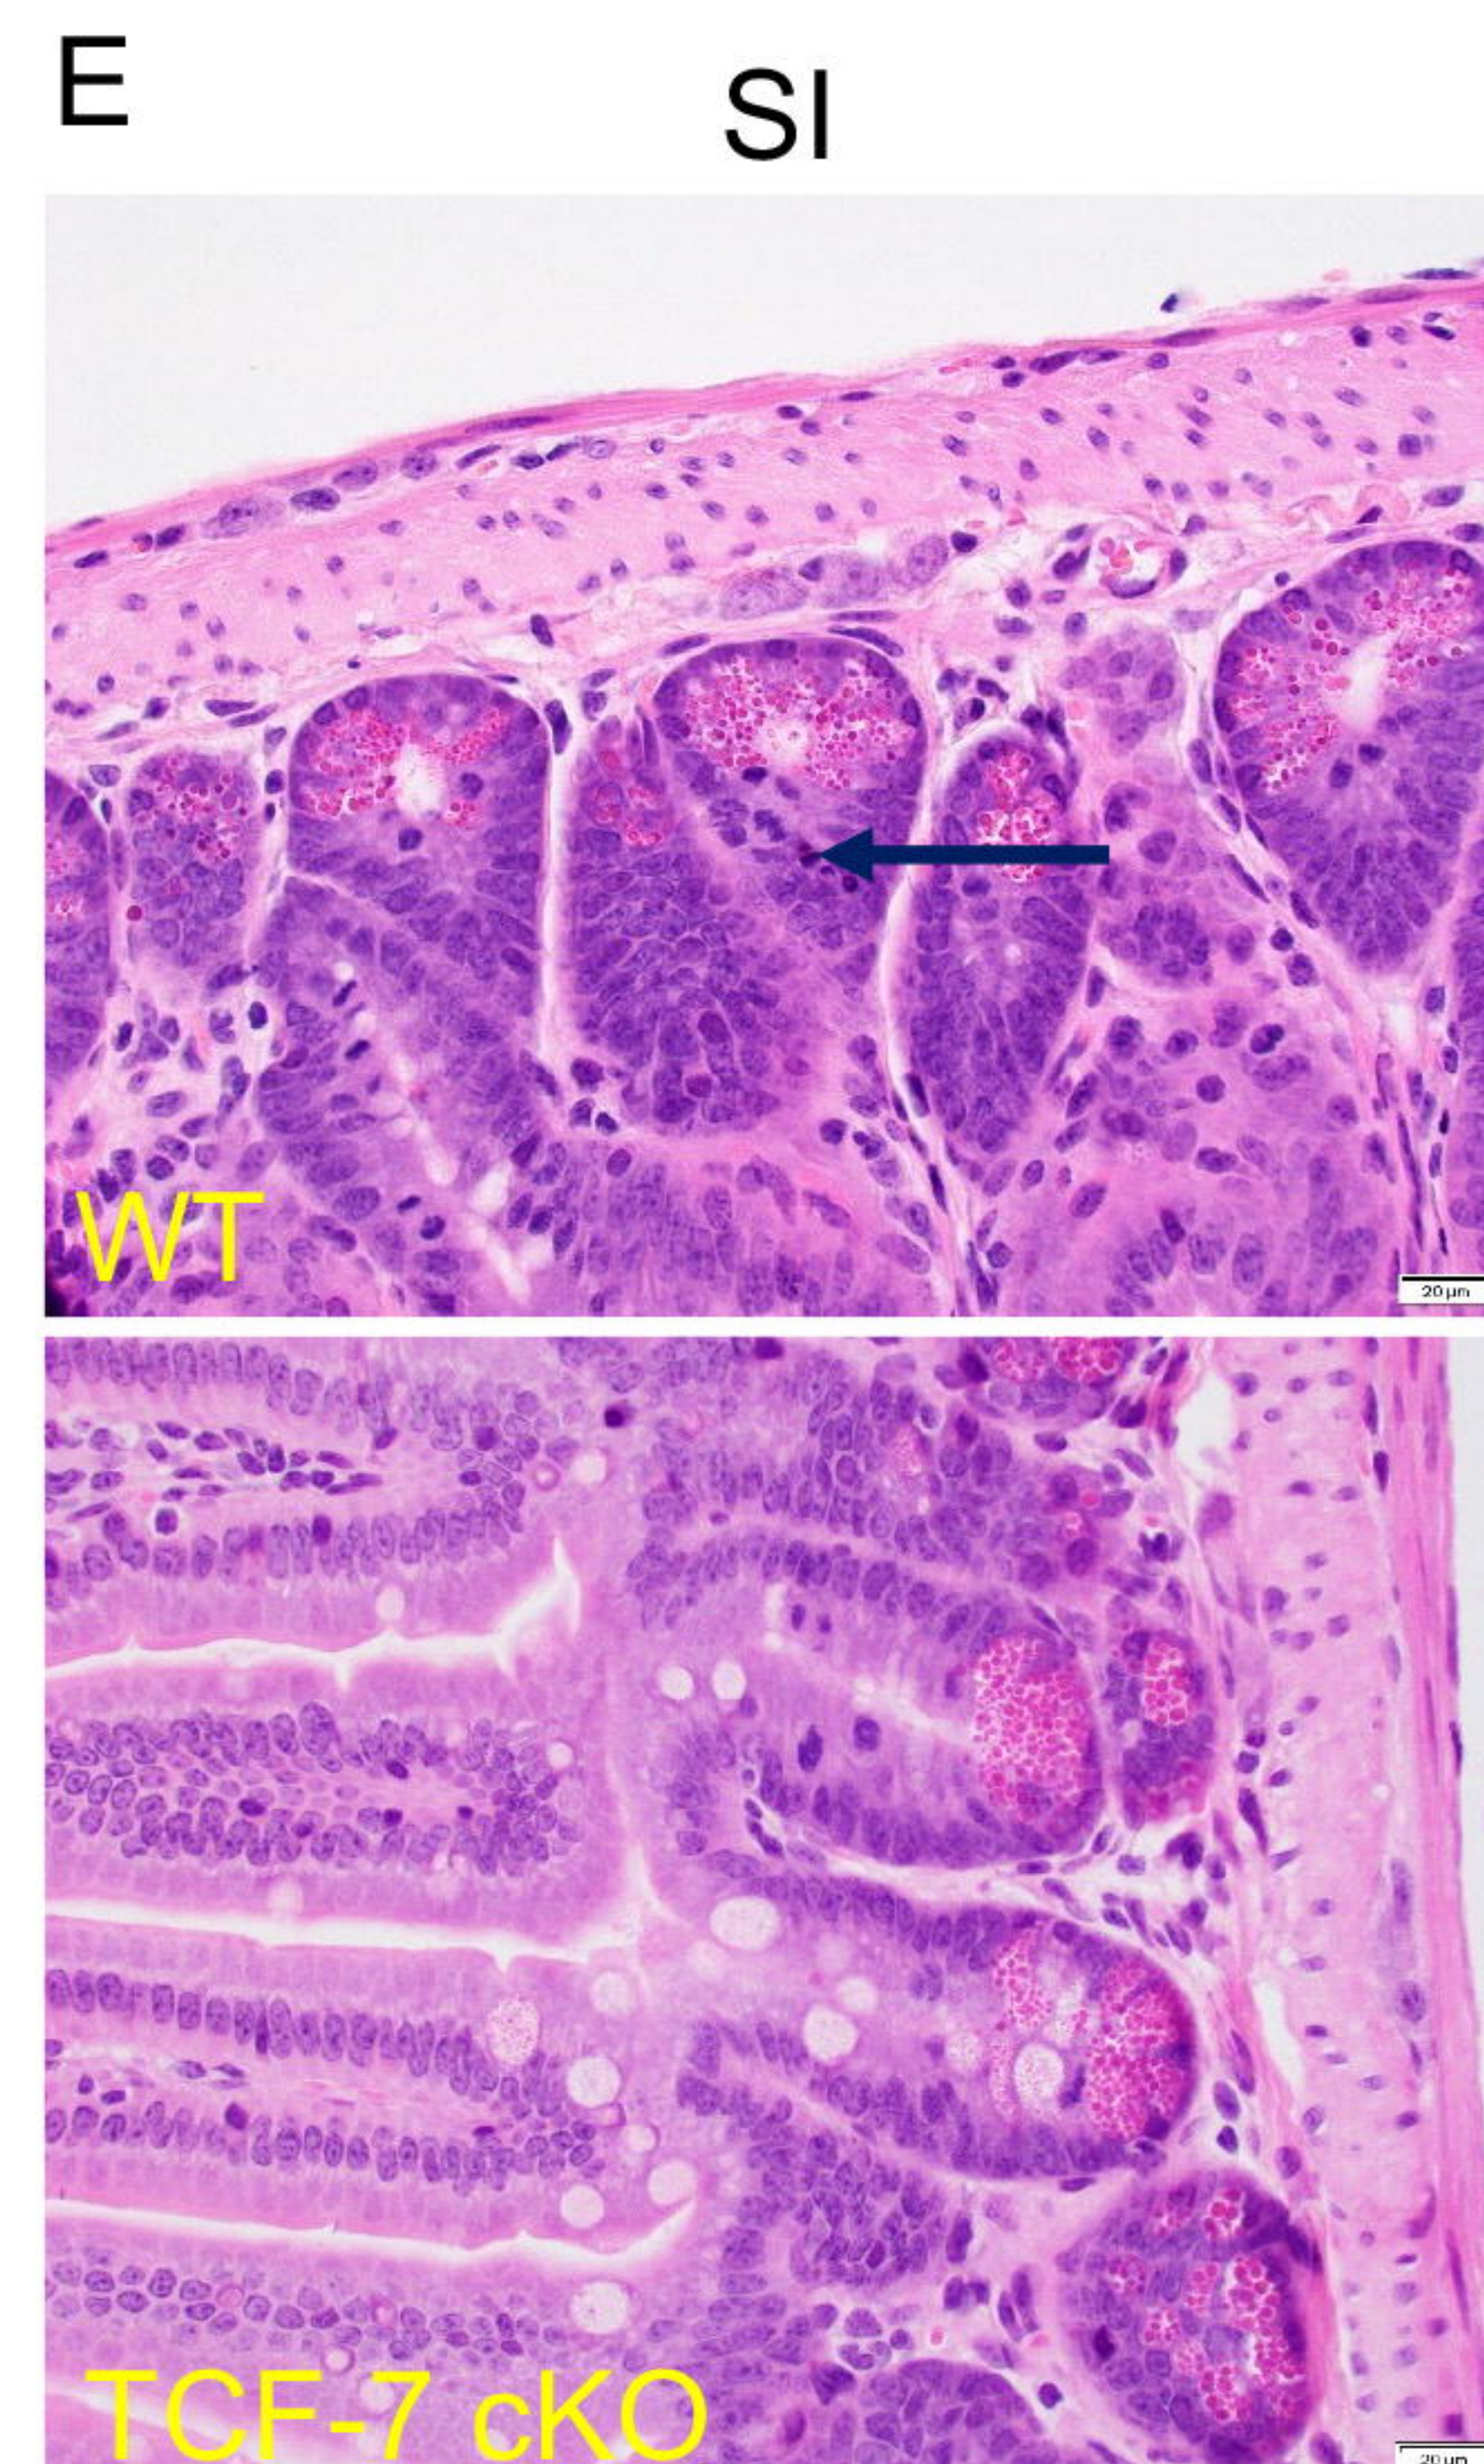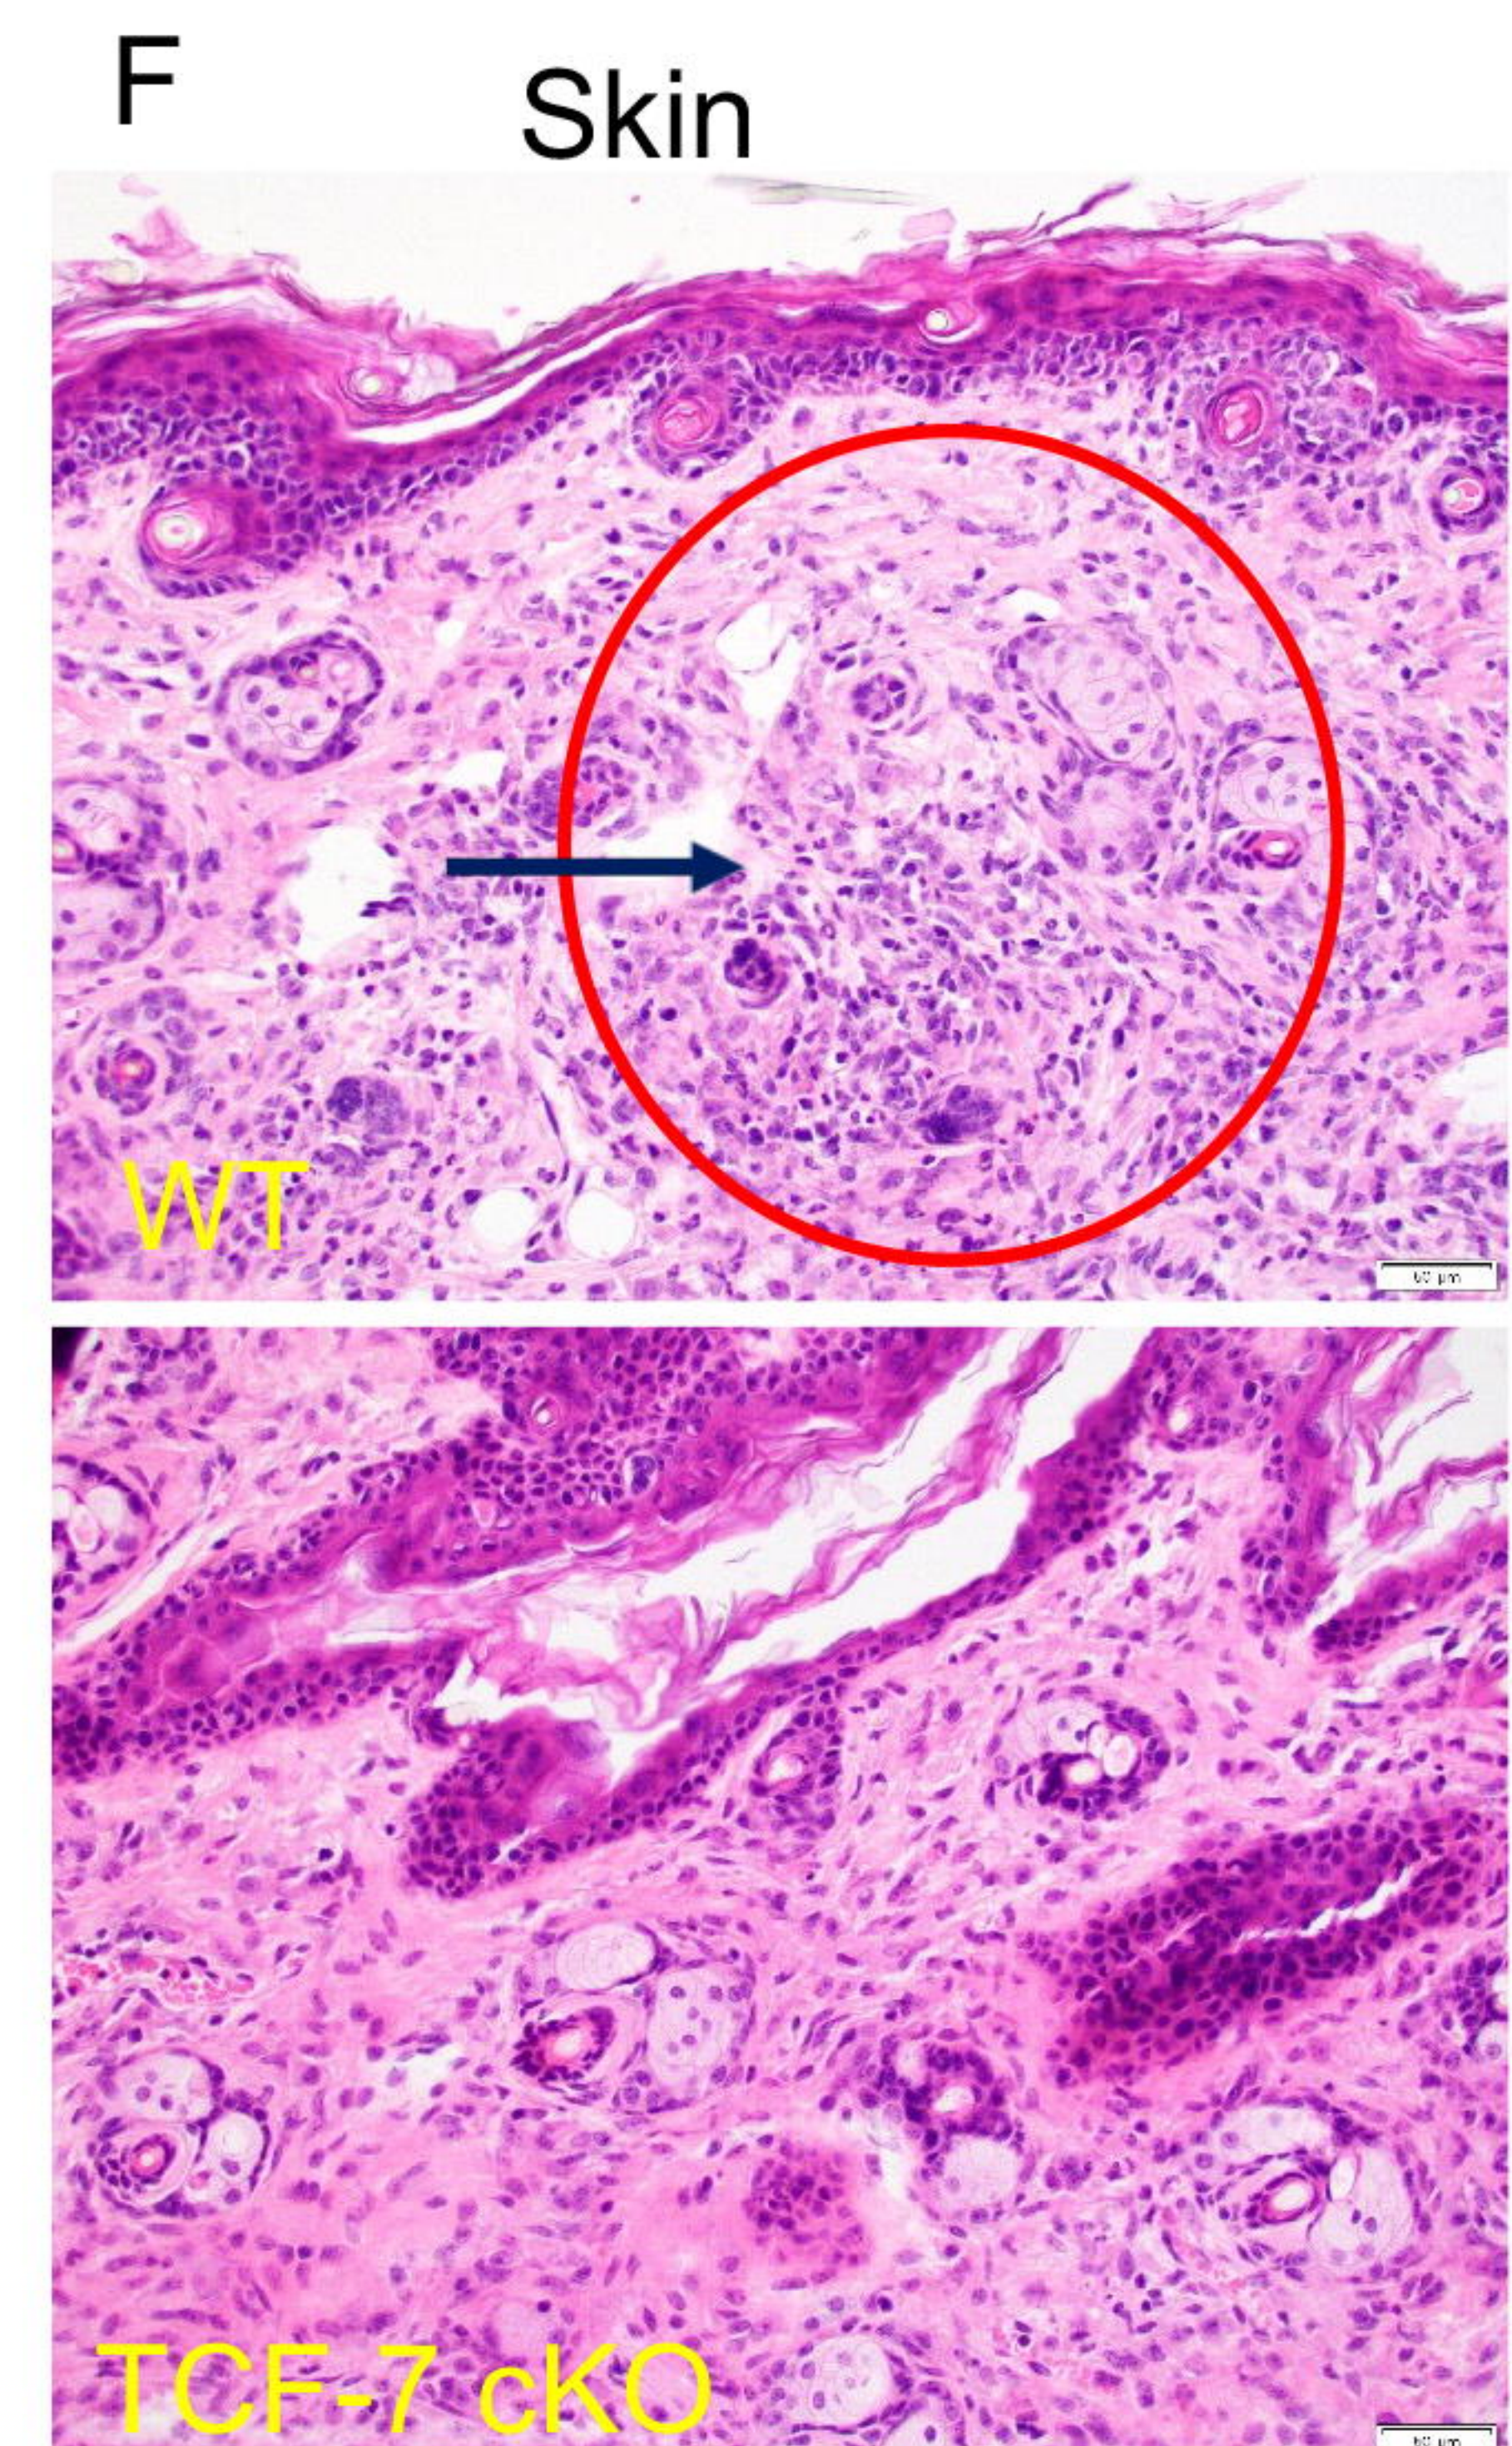

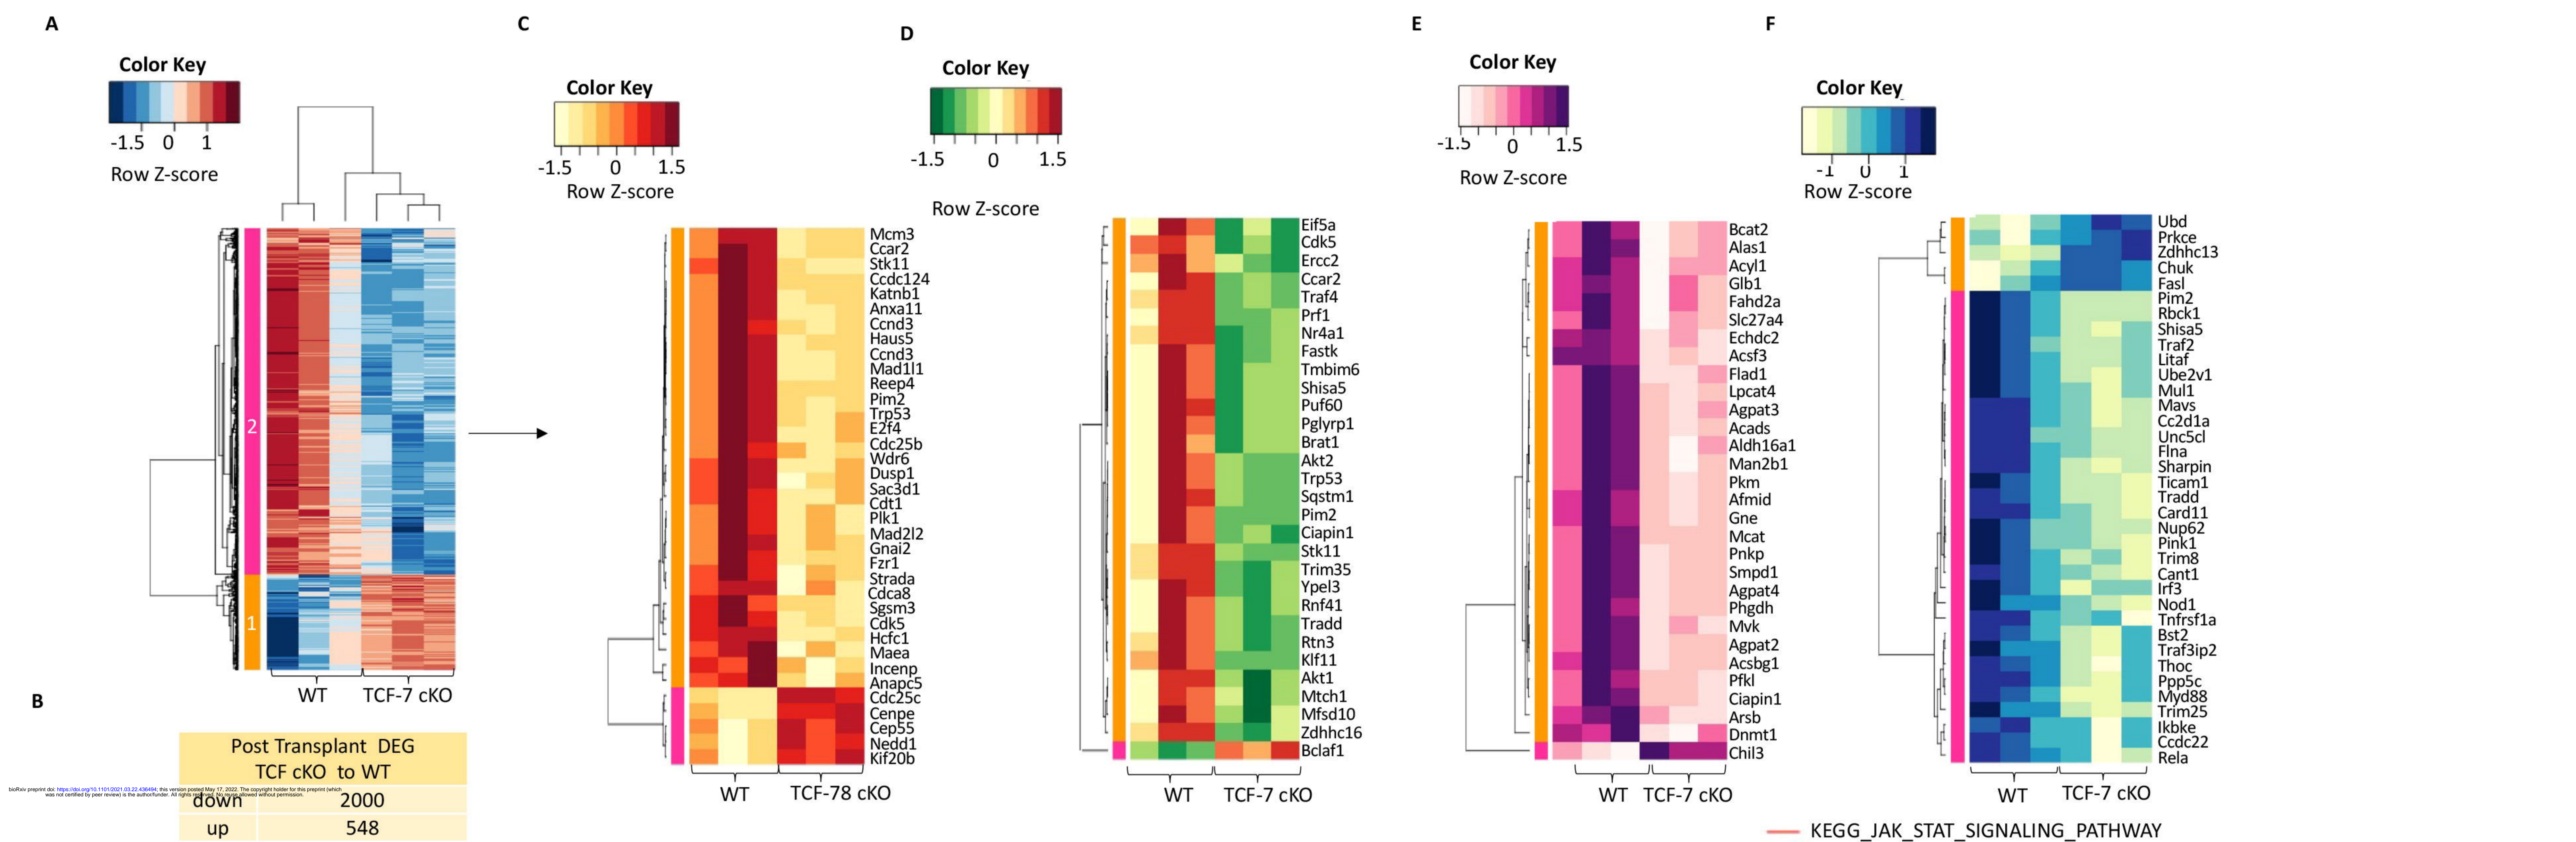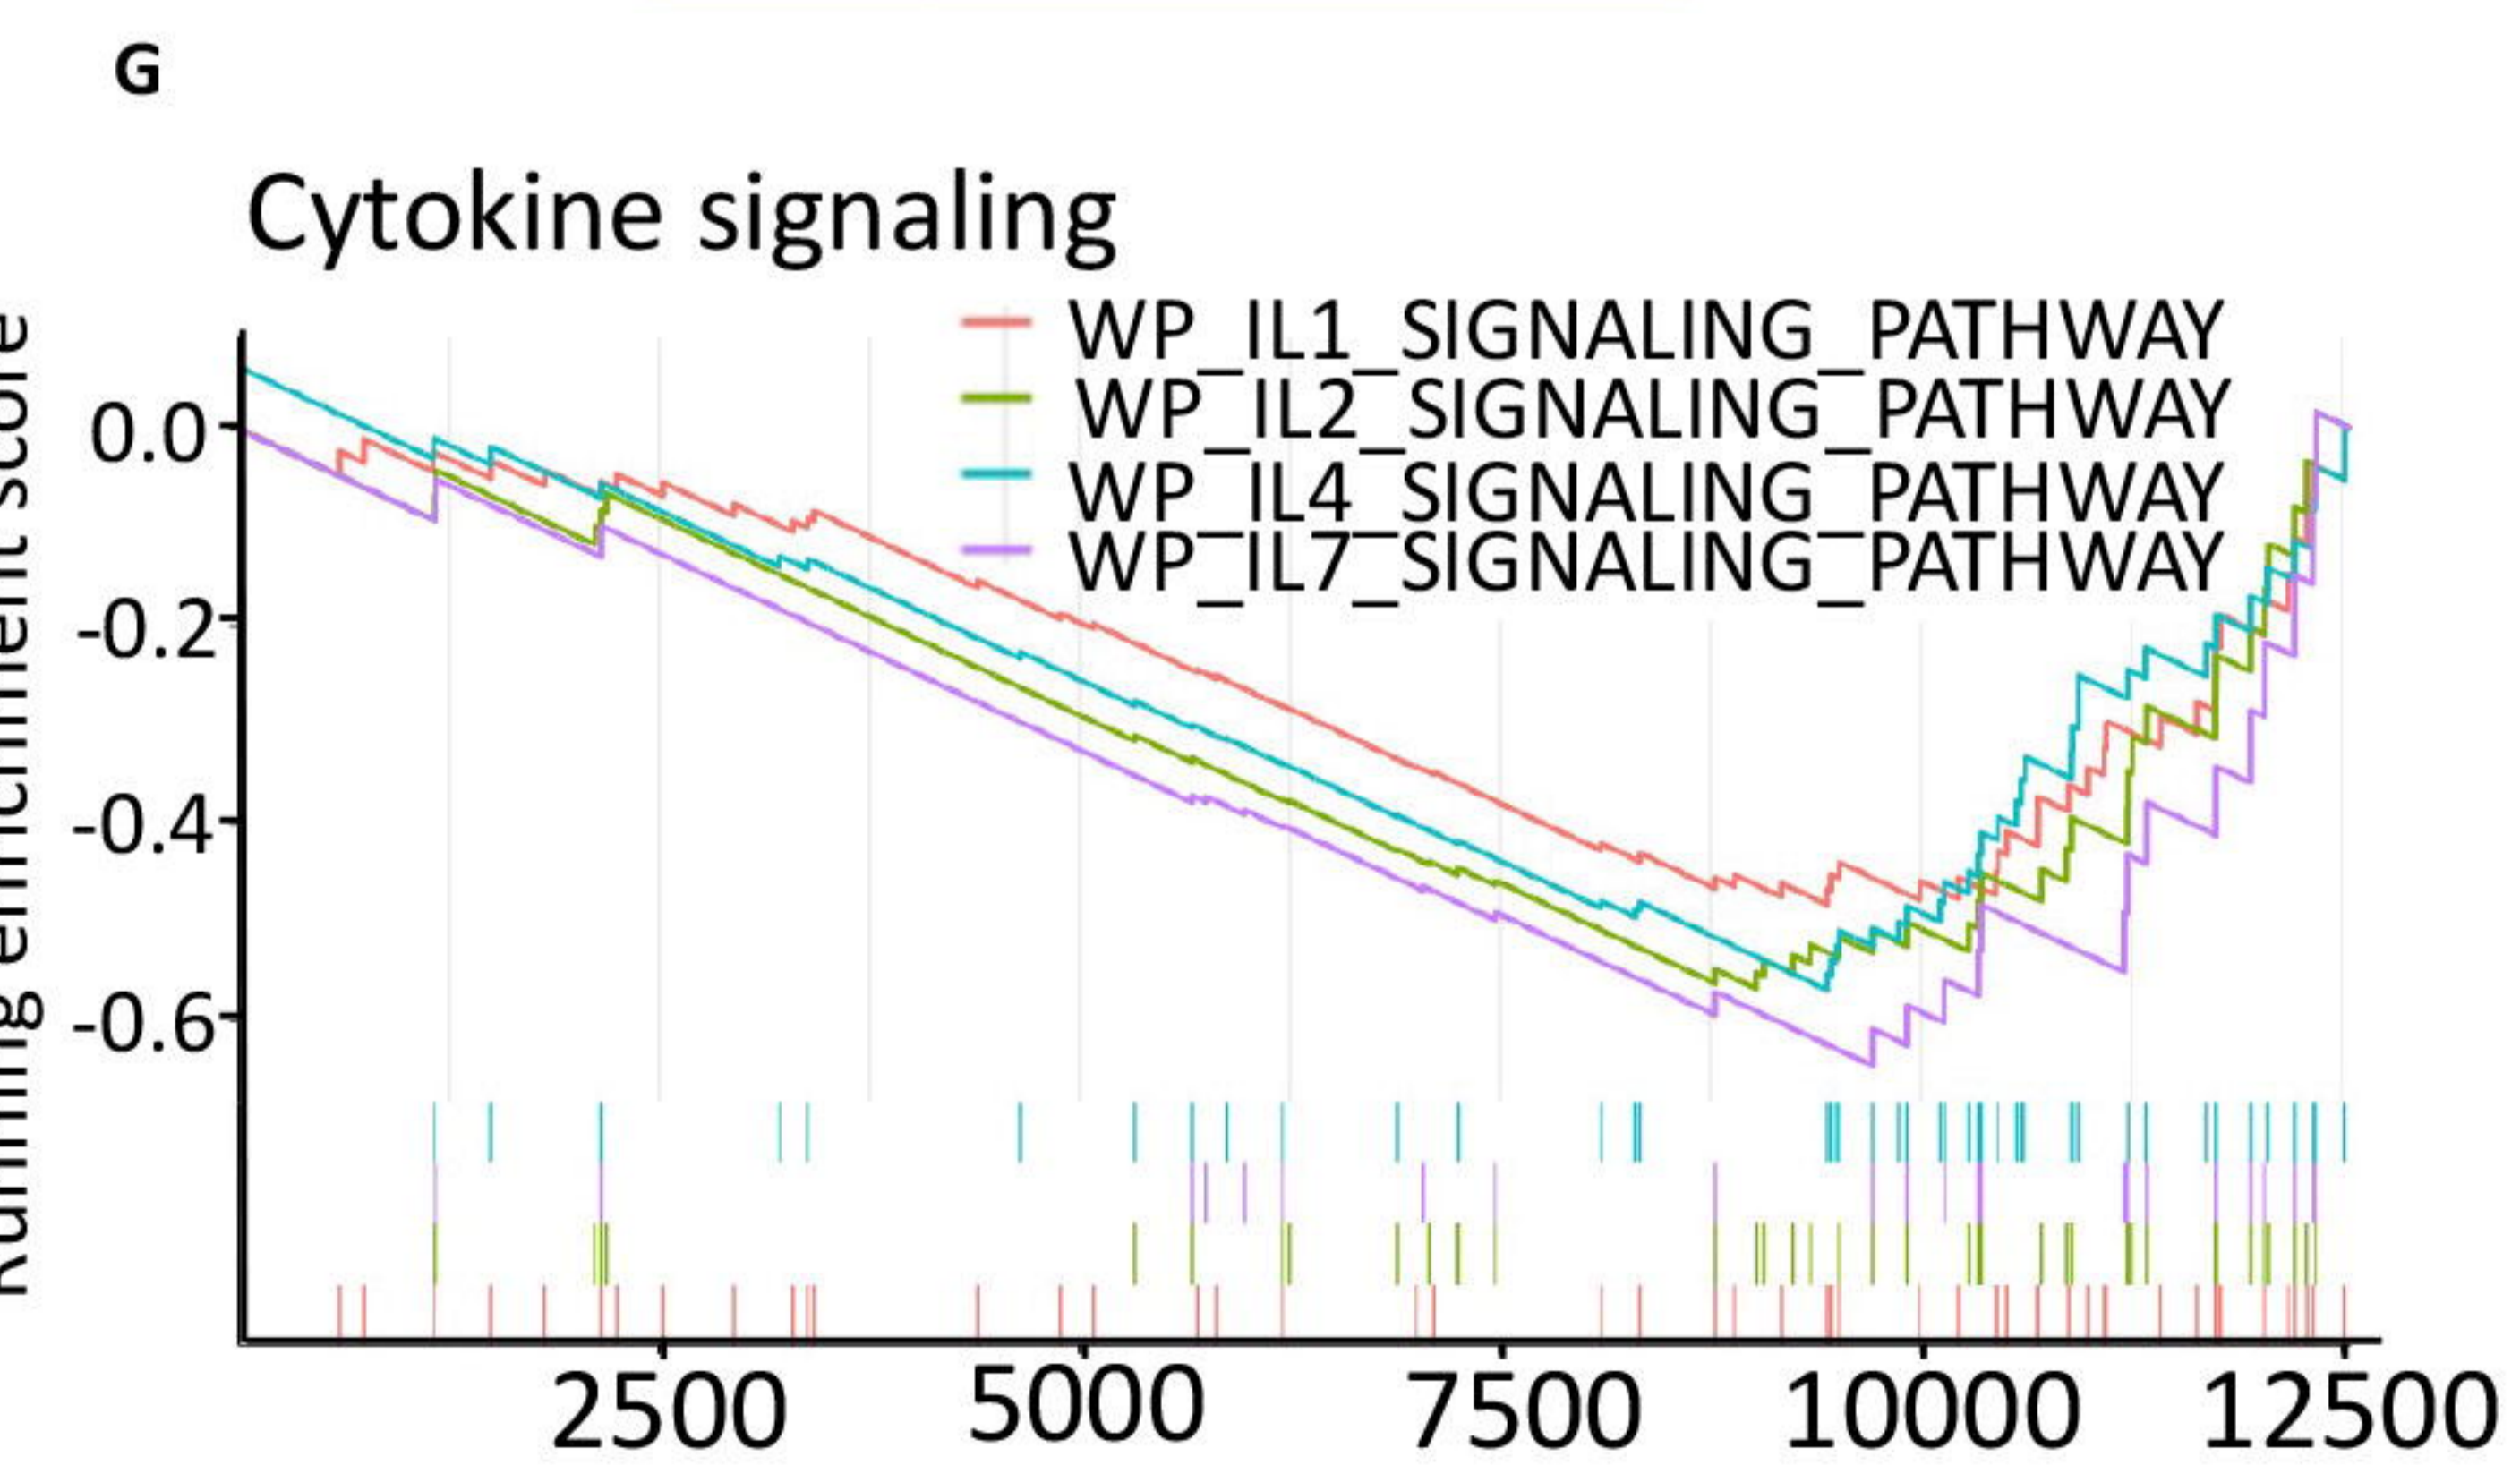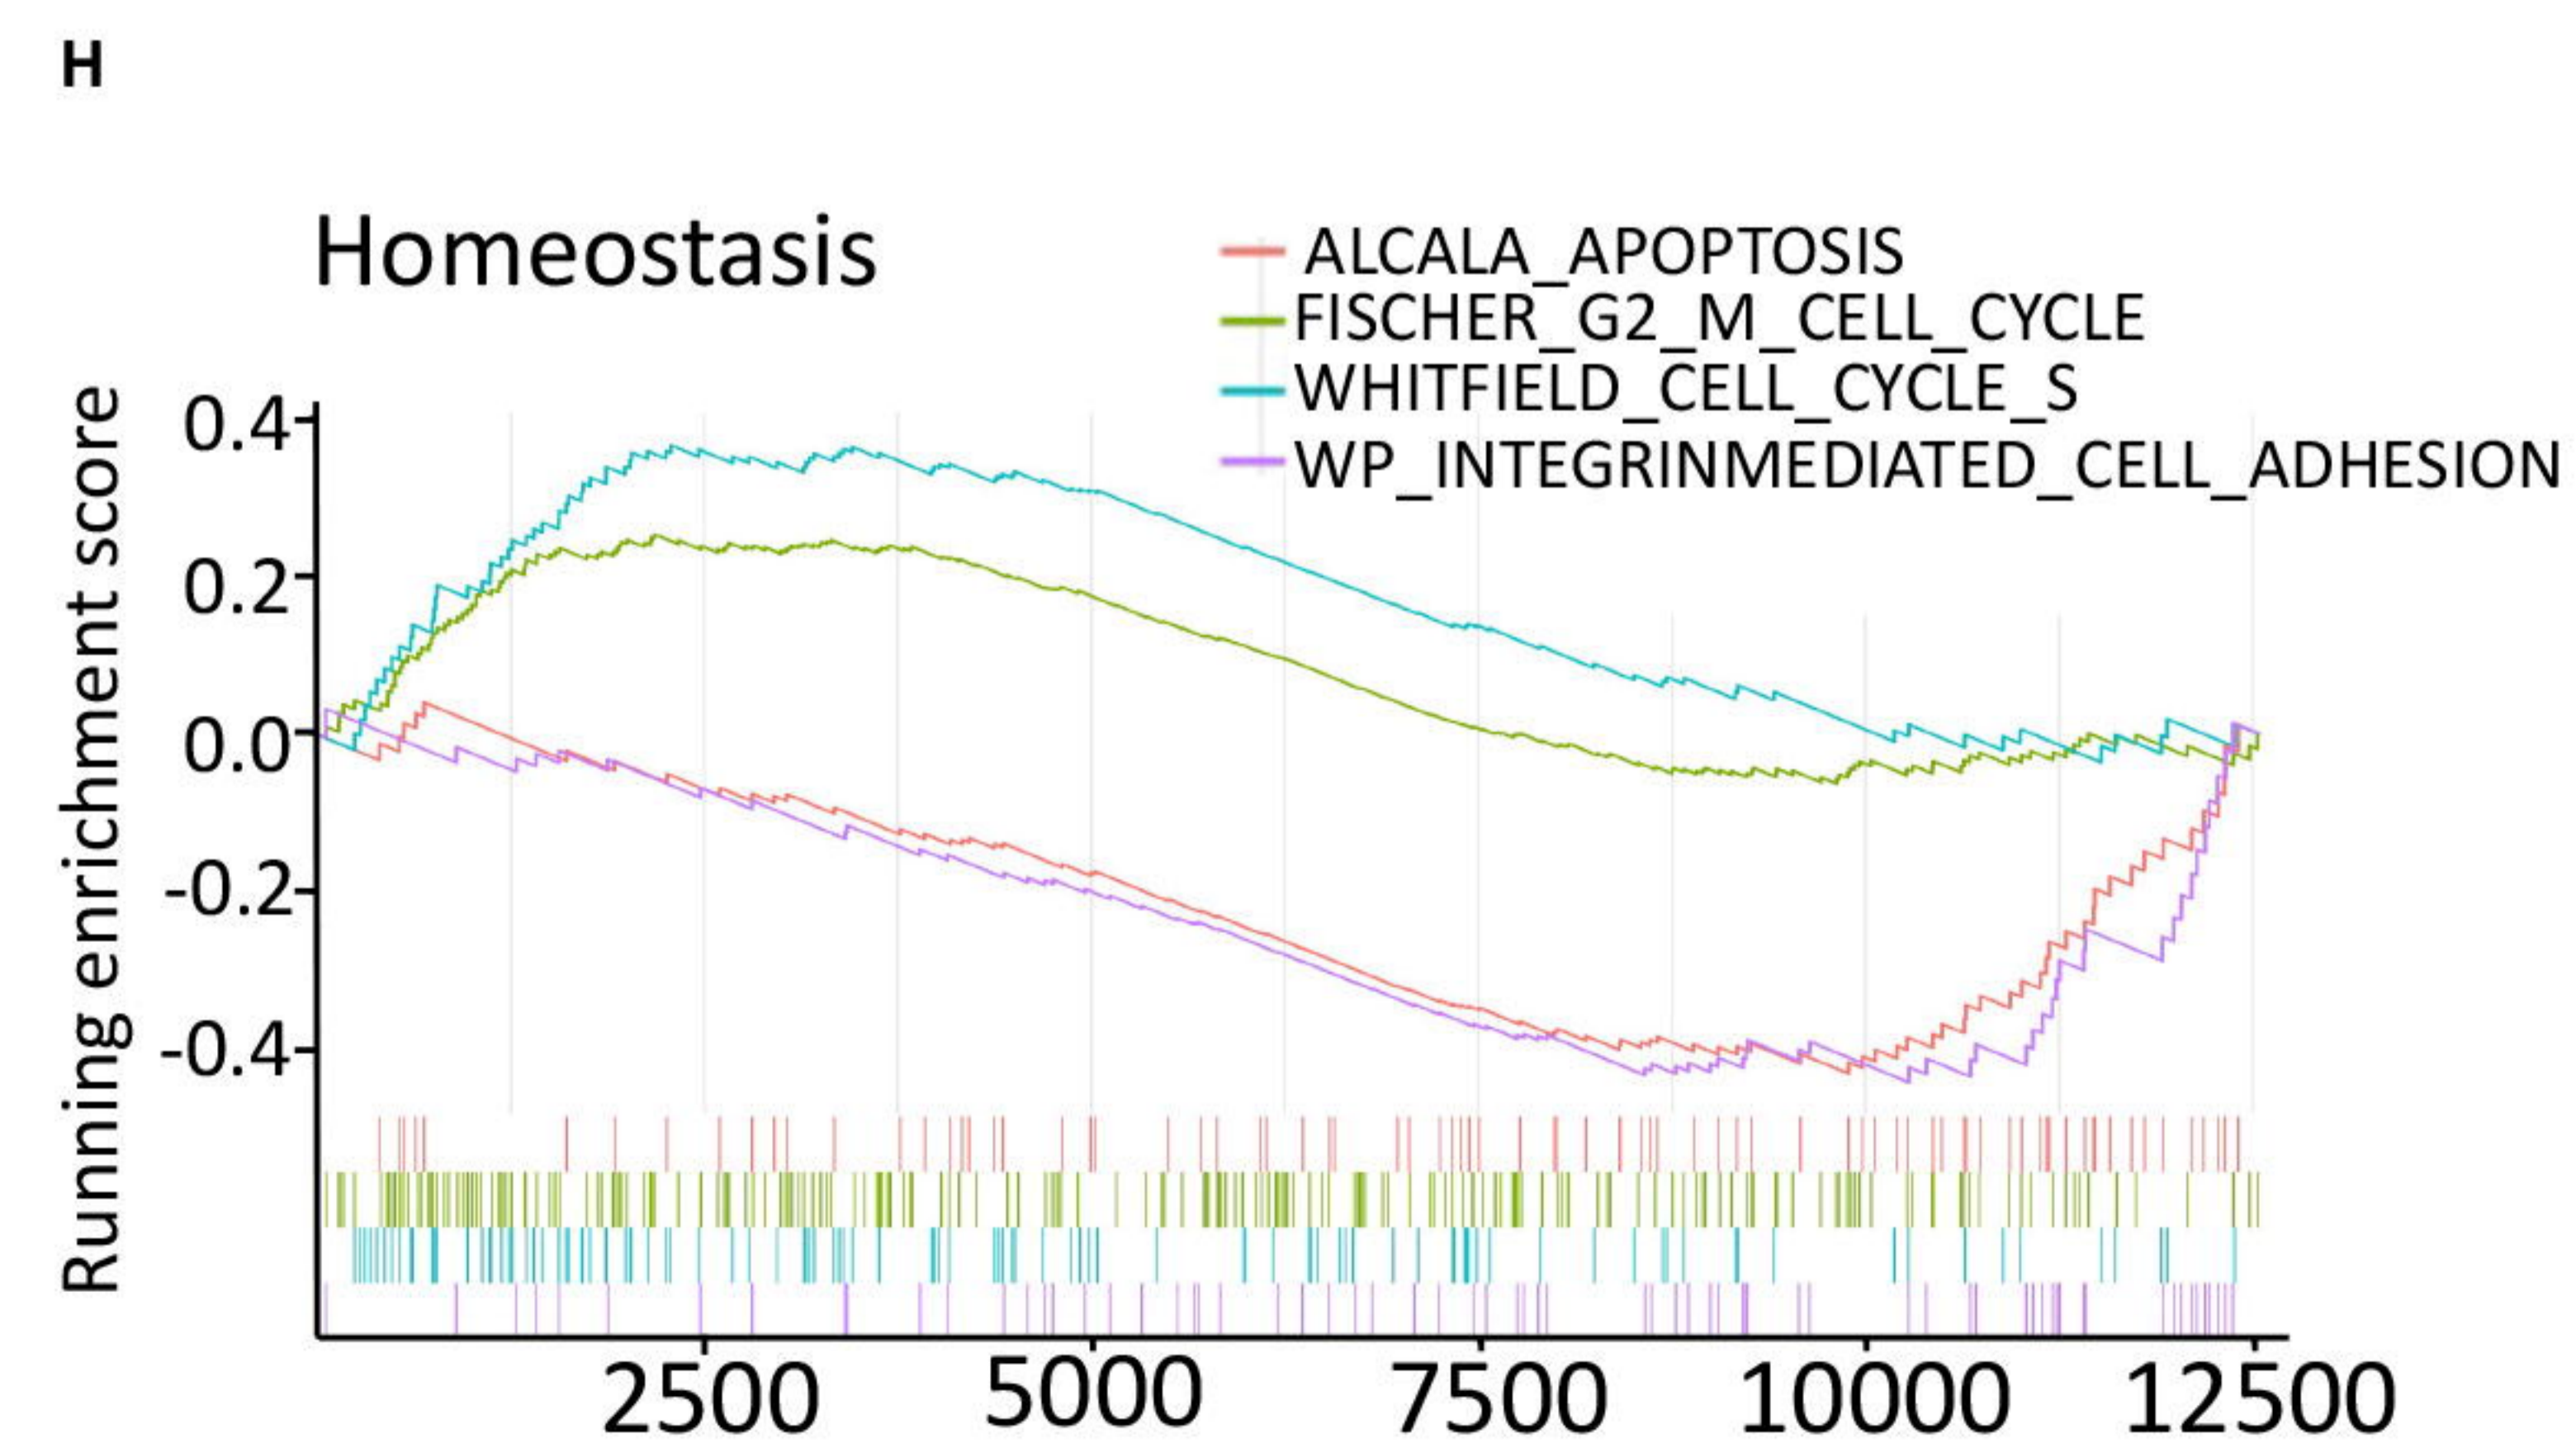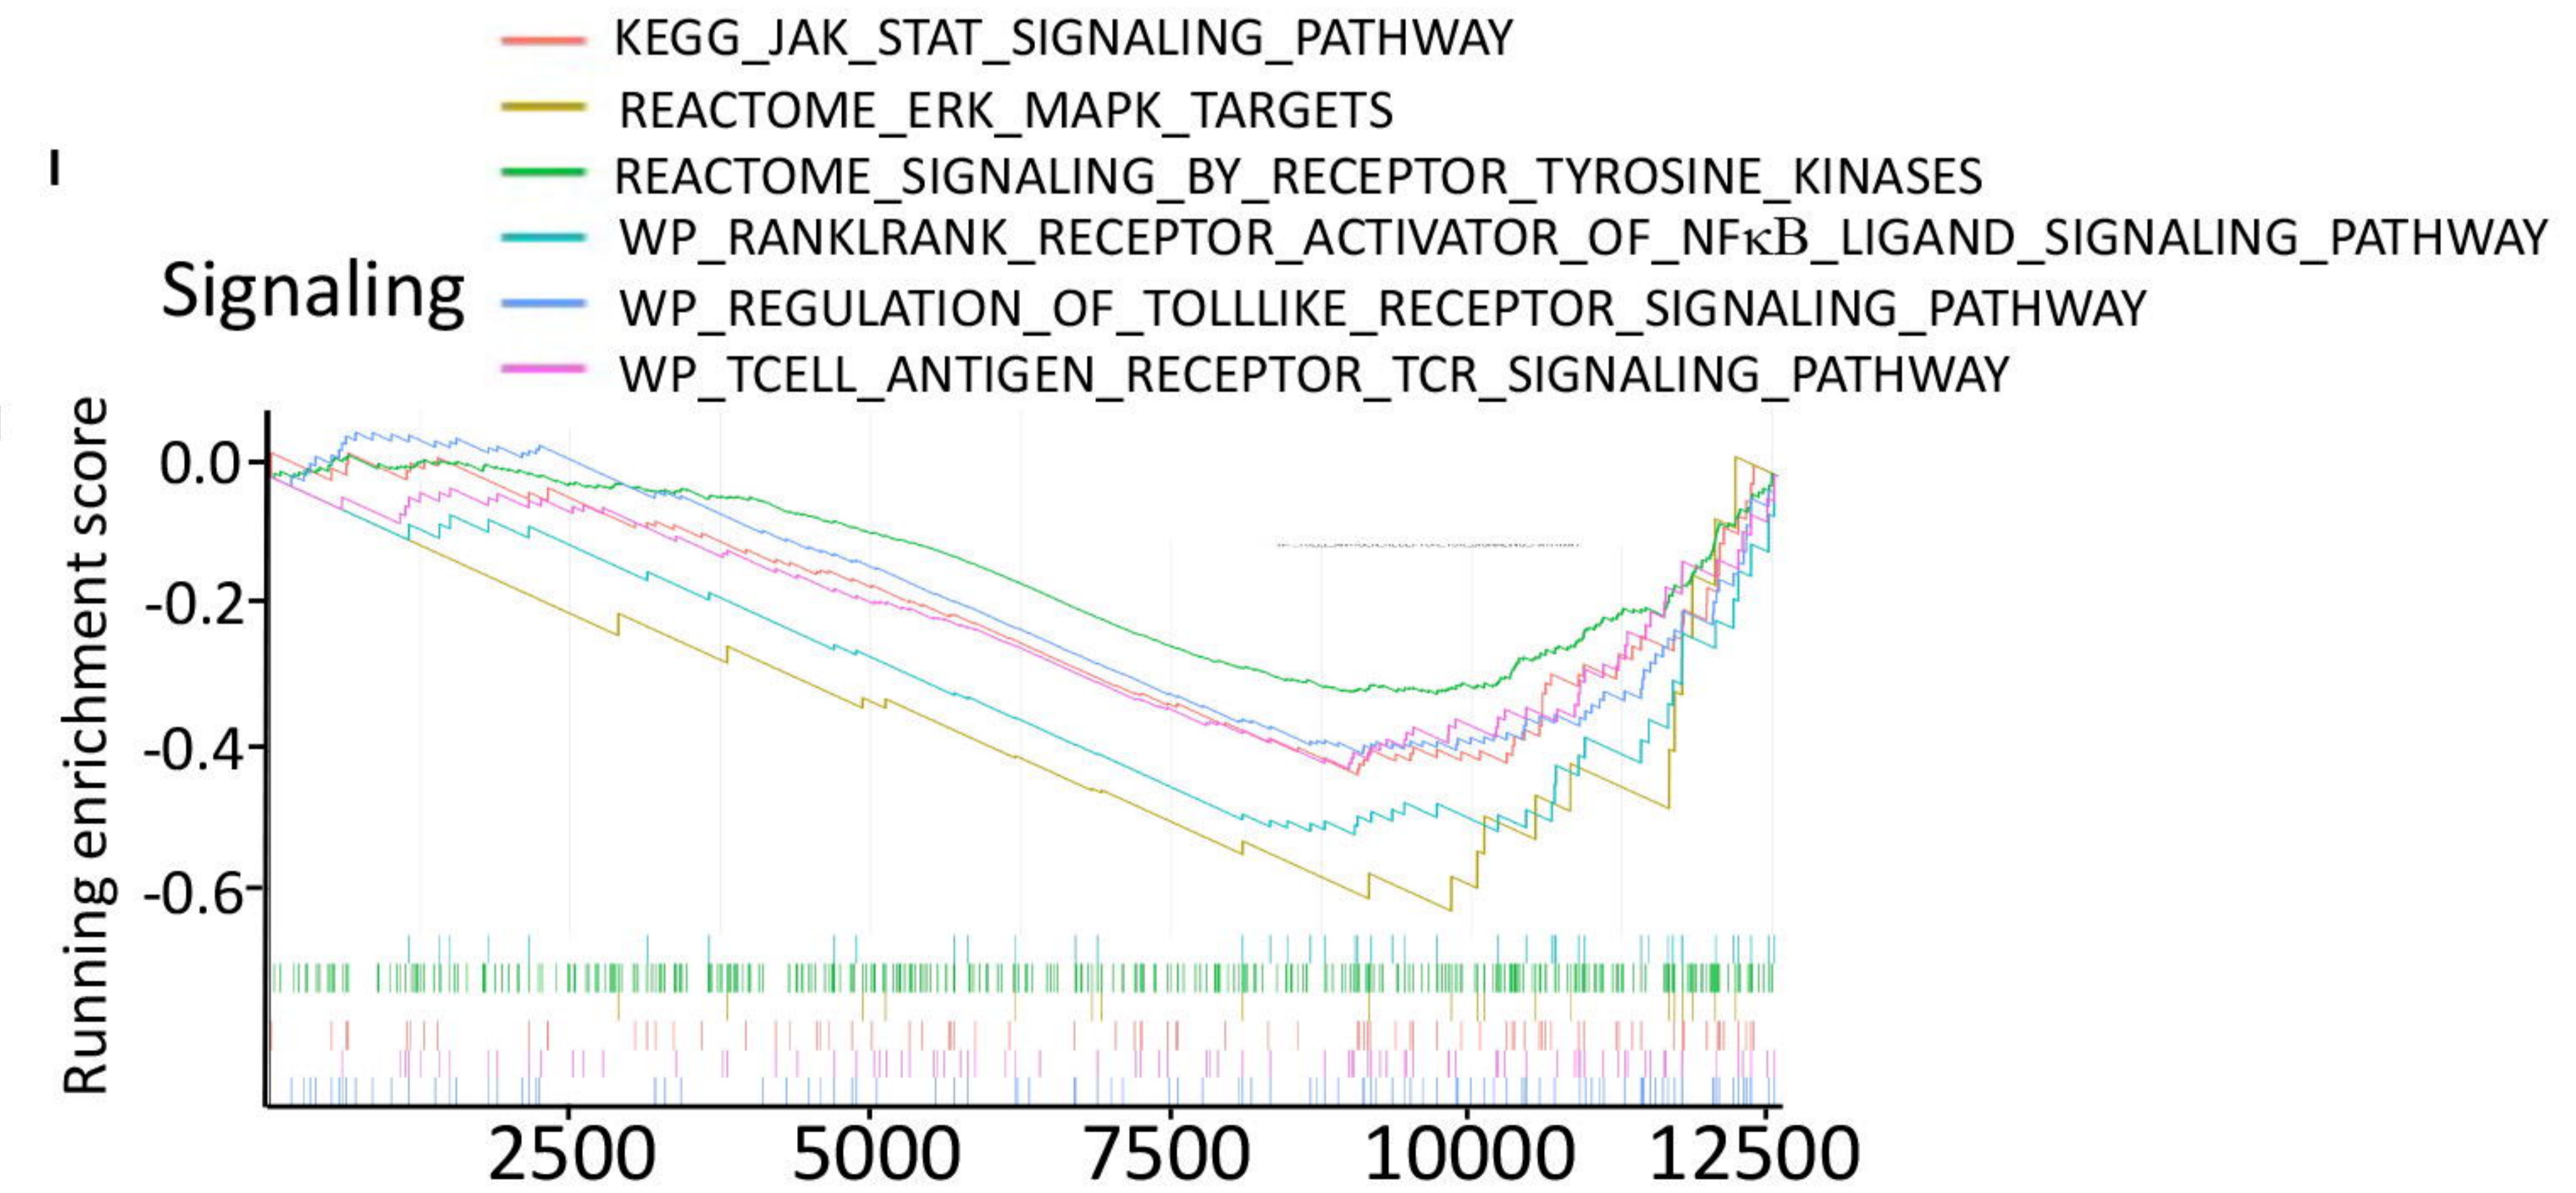

A

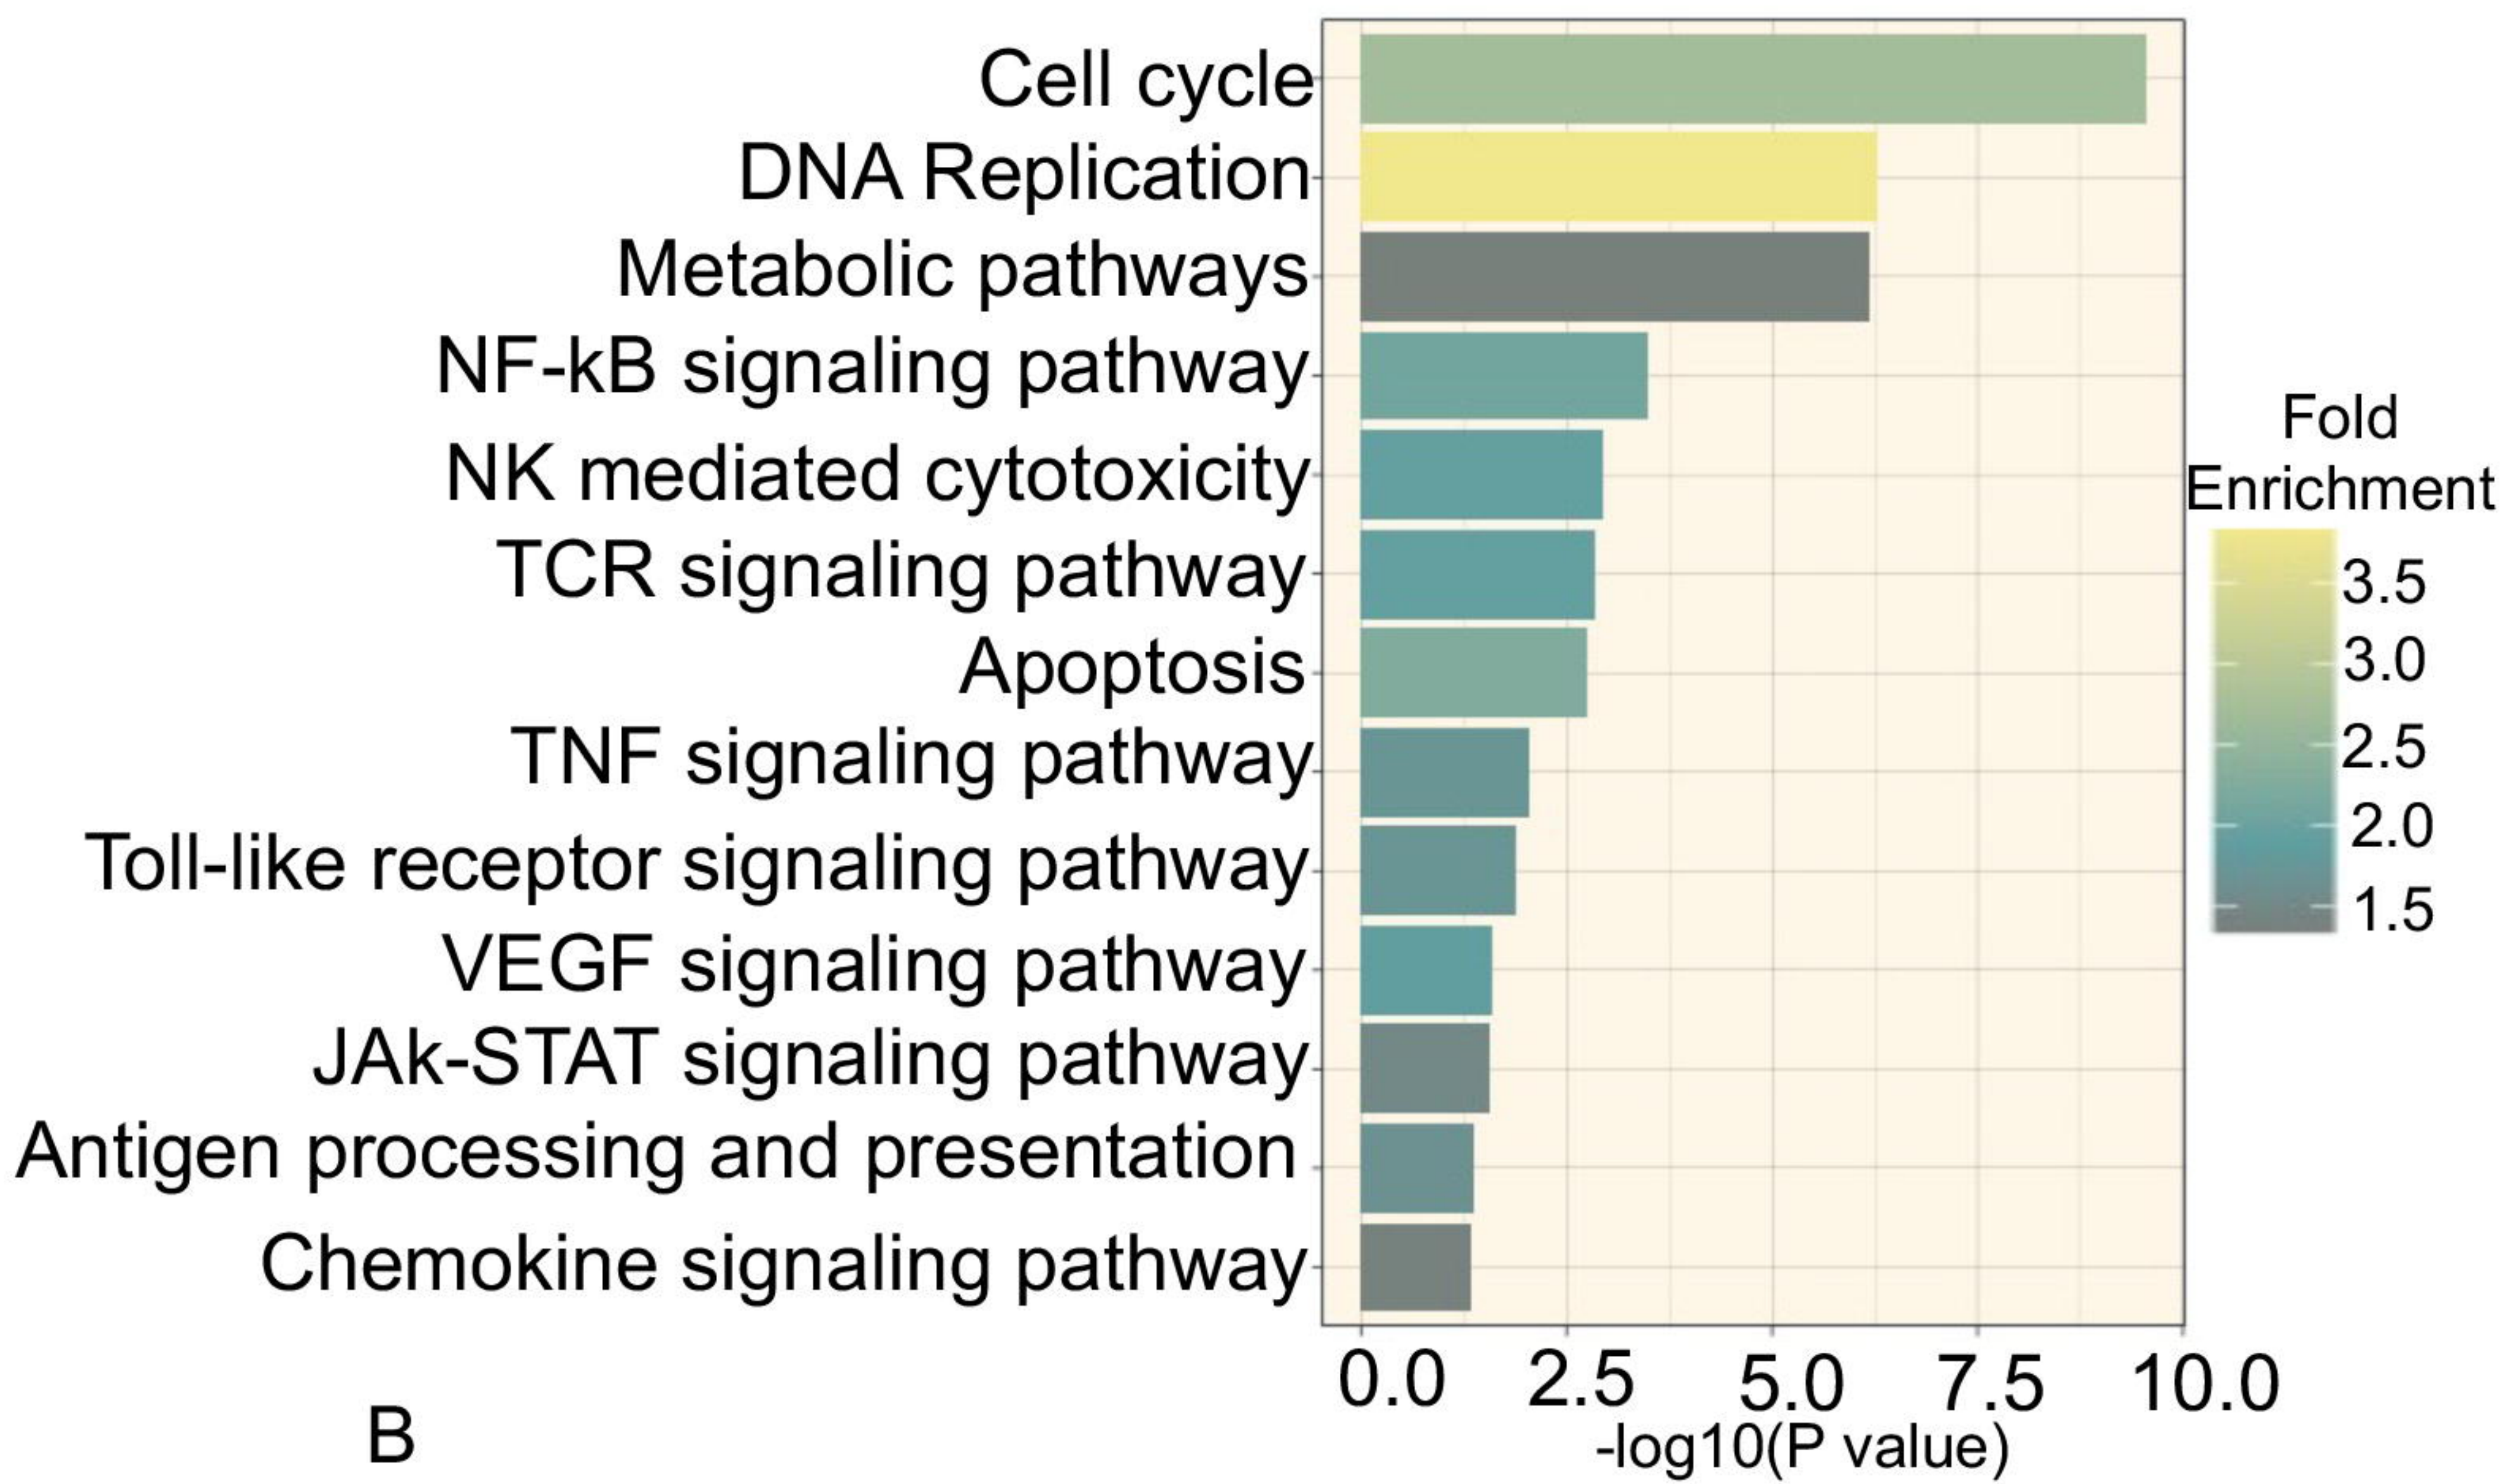

B

Color Key

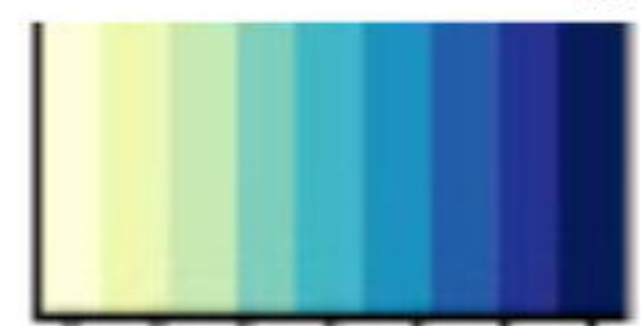

-1.5 0 1

Row Z-score

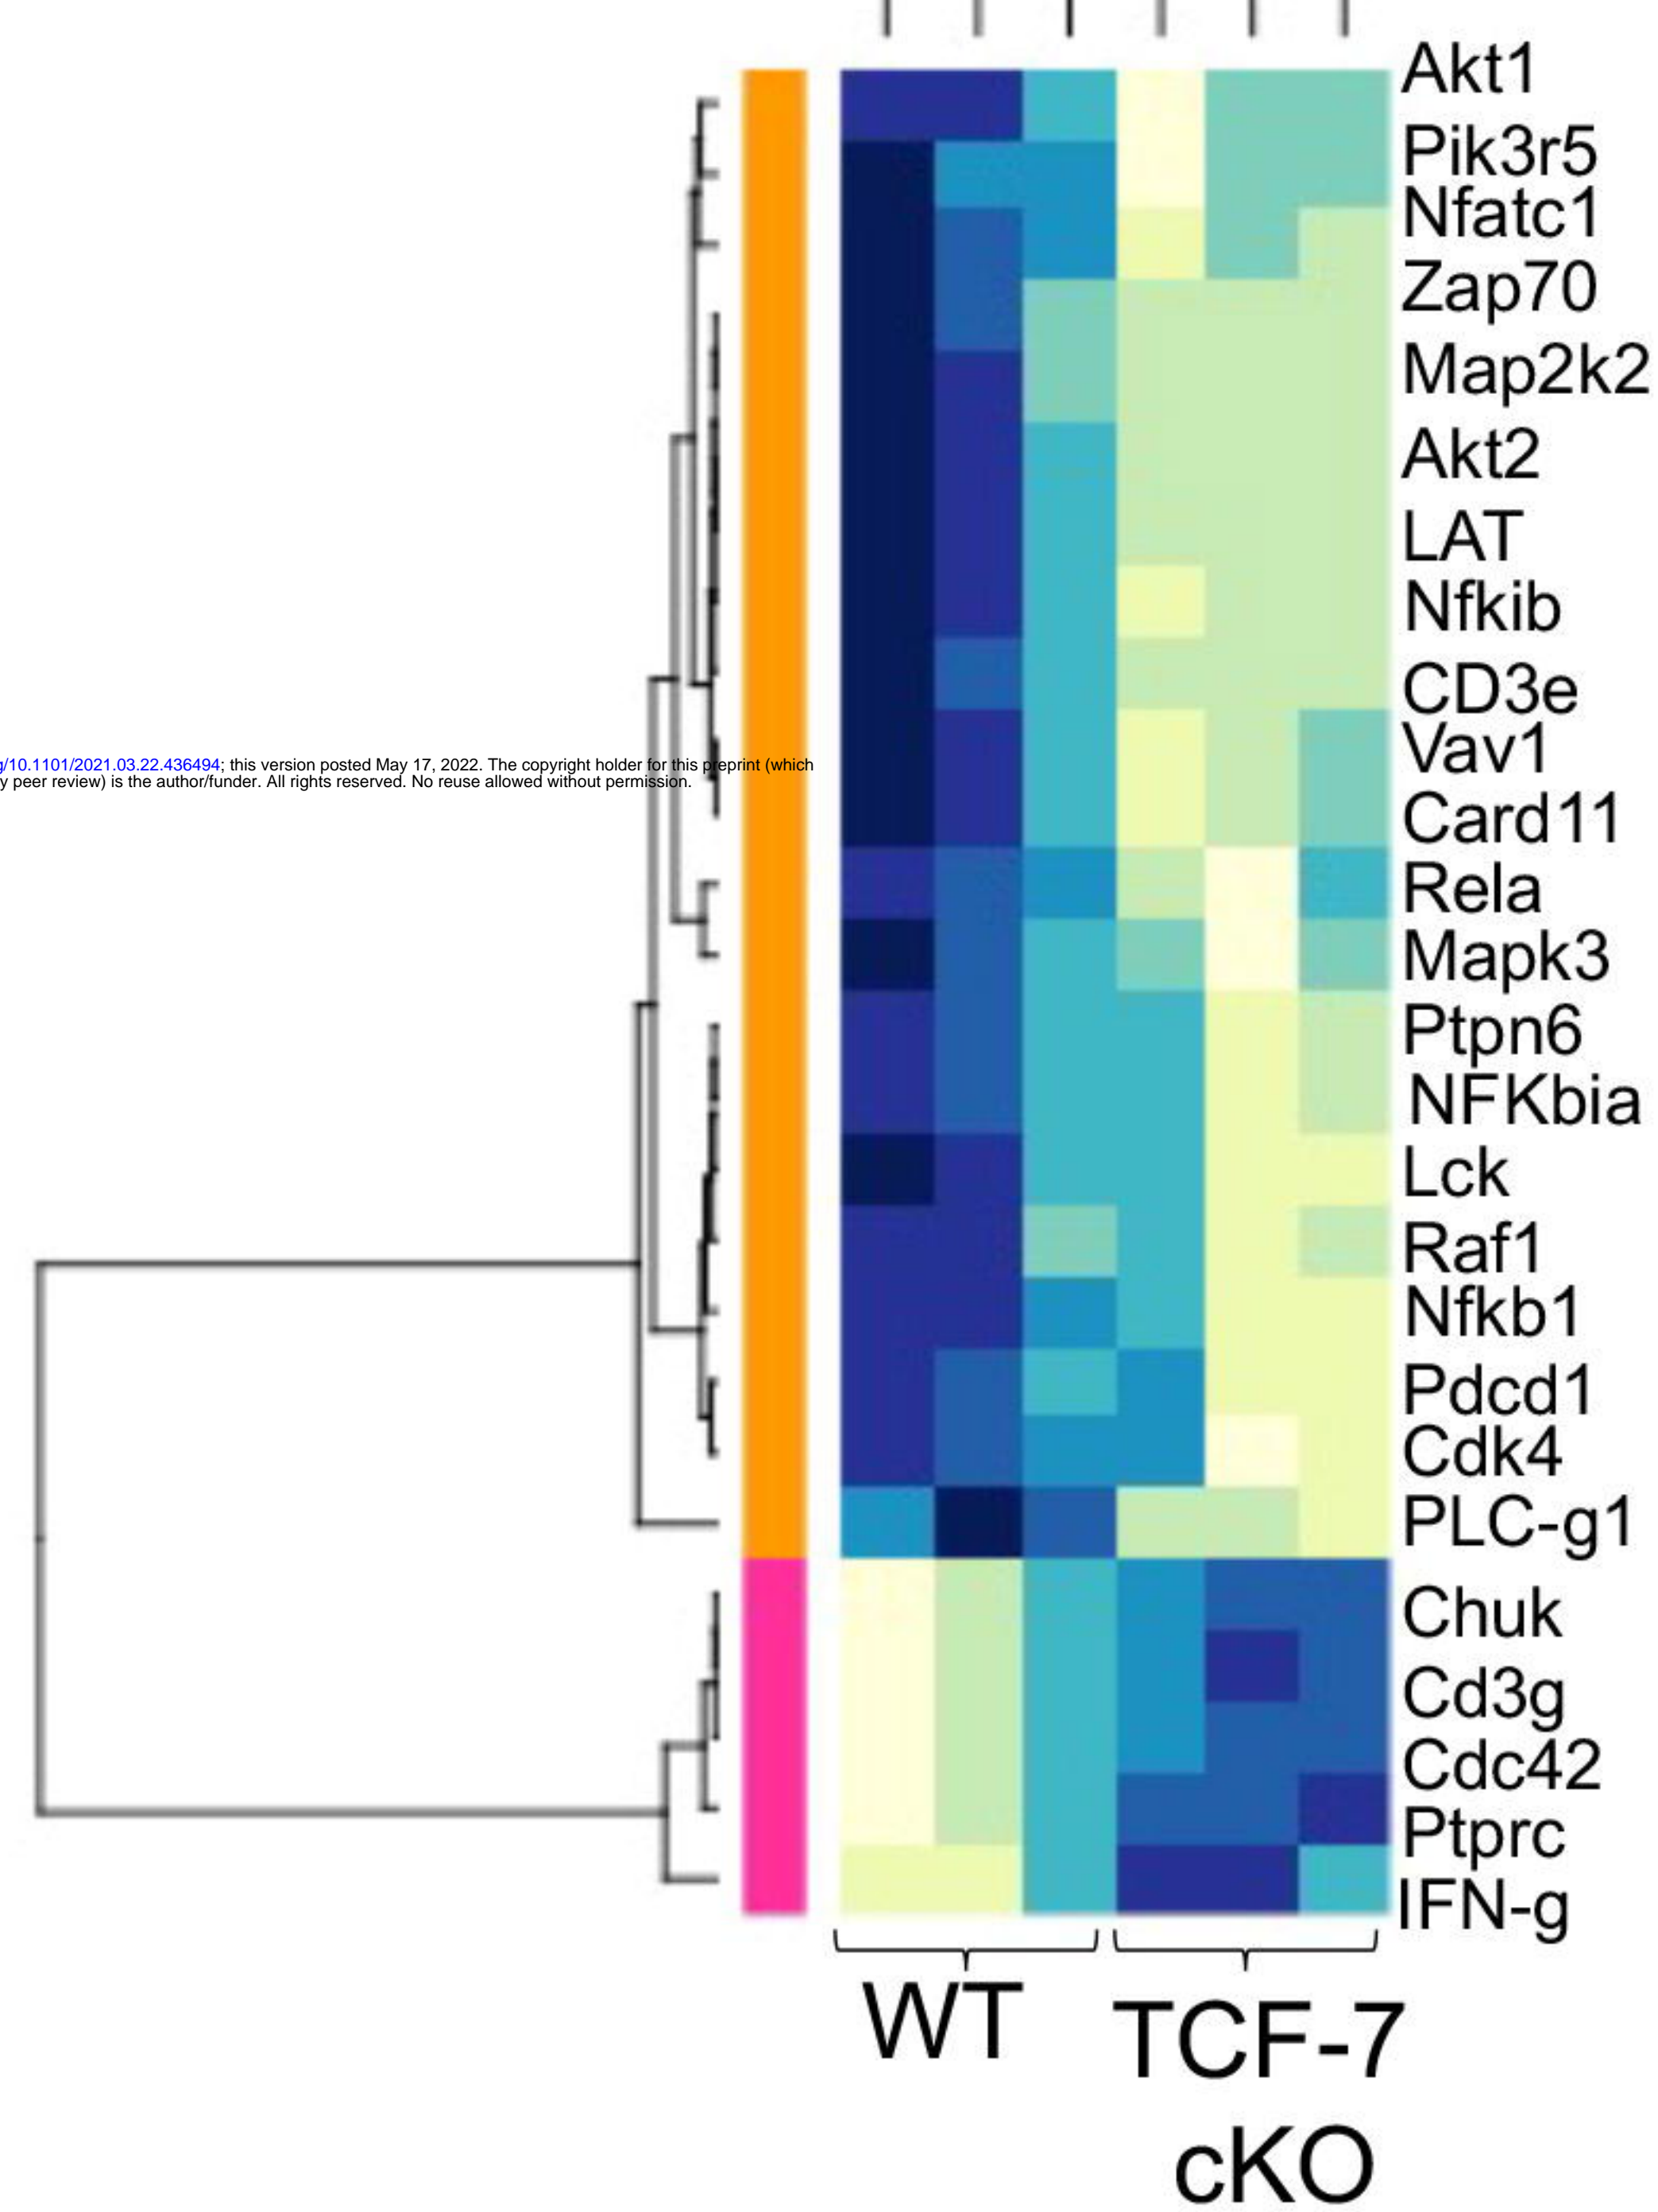

C

Color Key

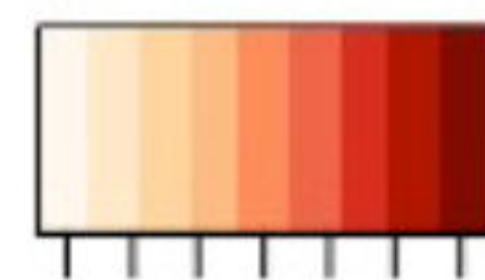

-1.5 0 1

Row Z-score

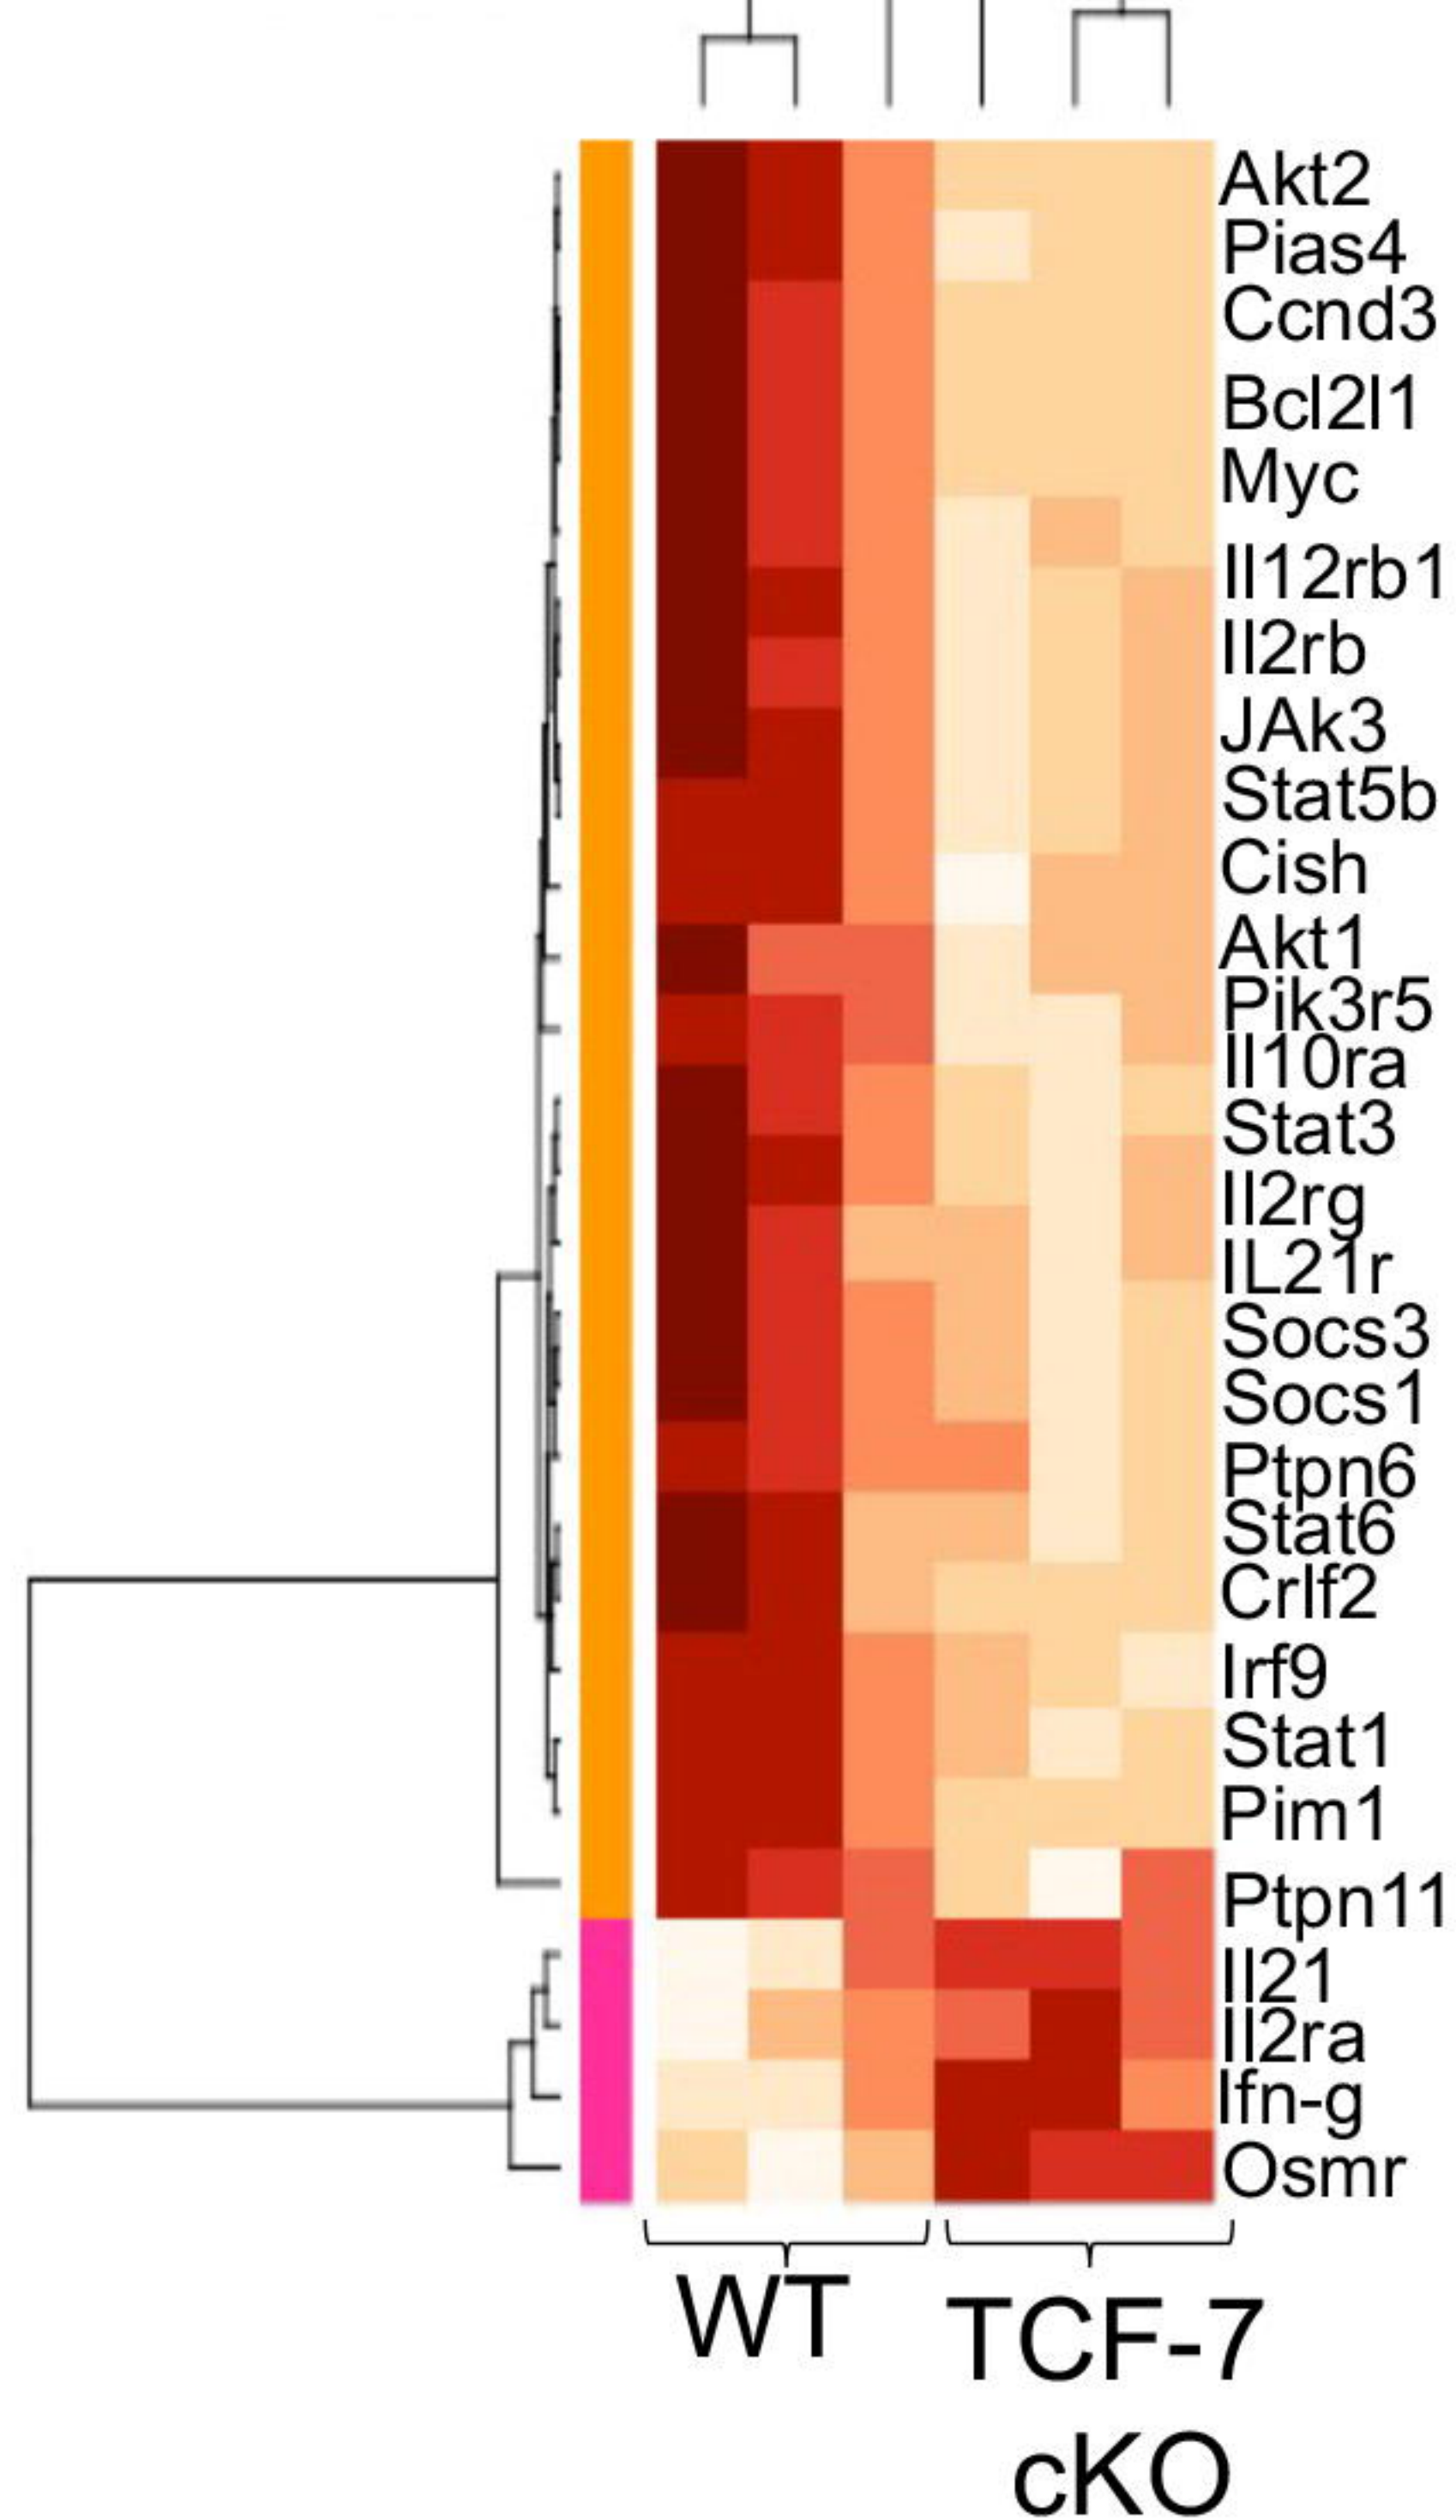

D No stim

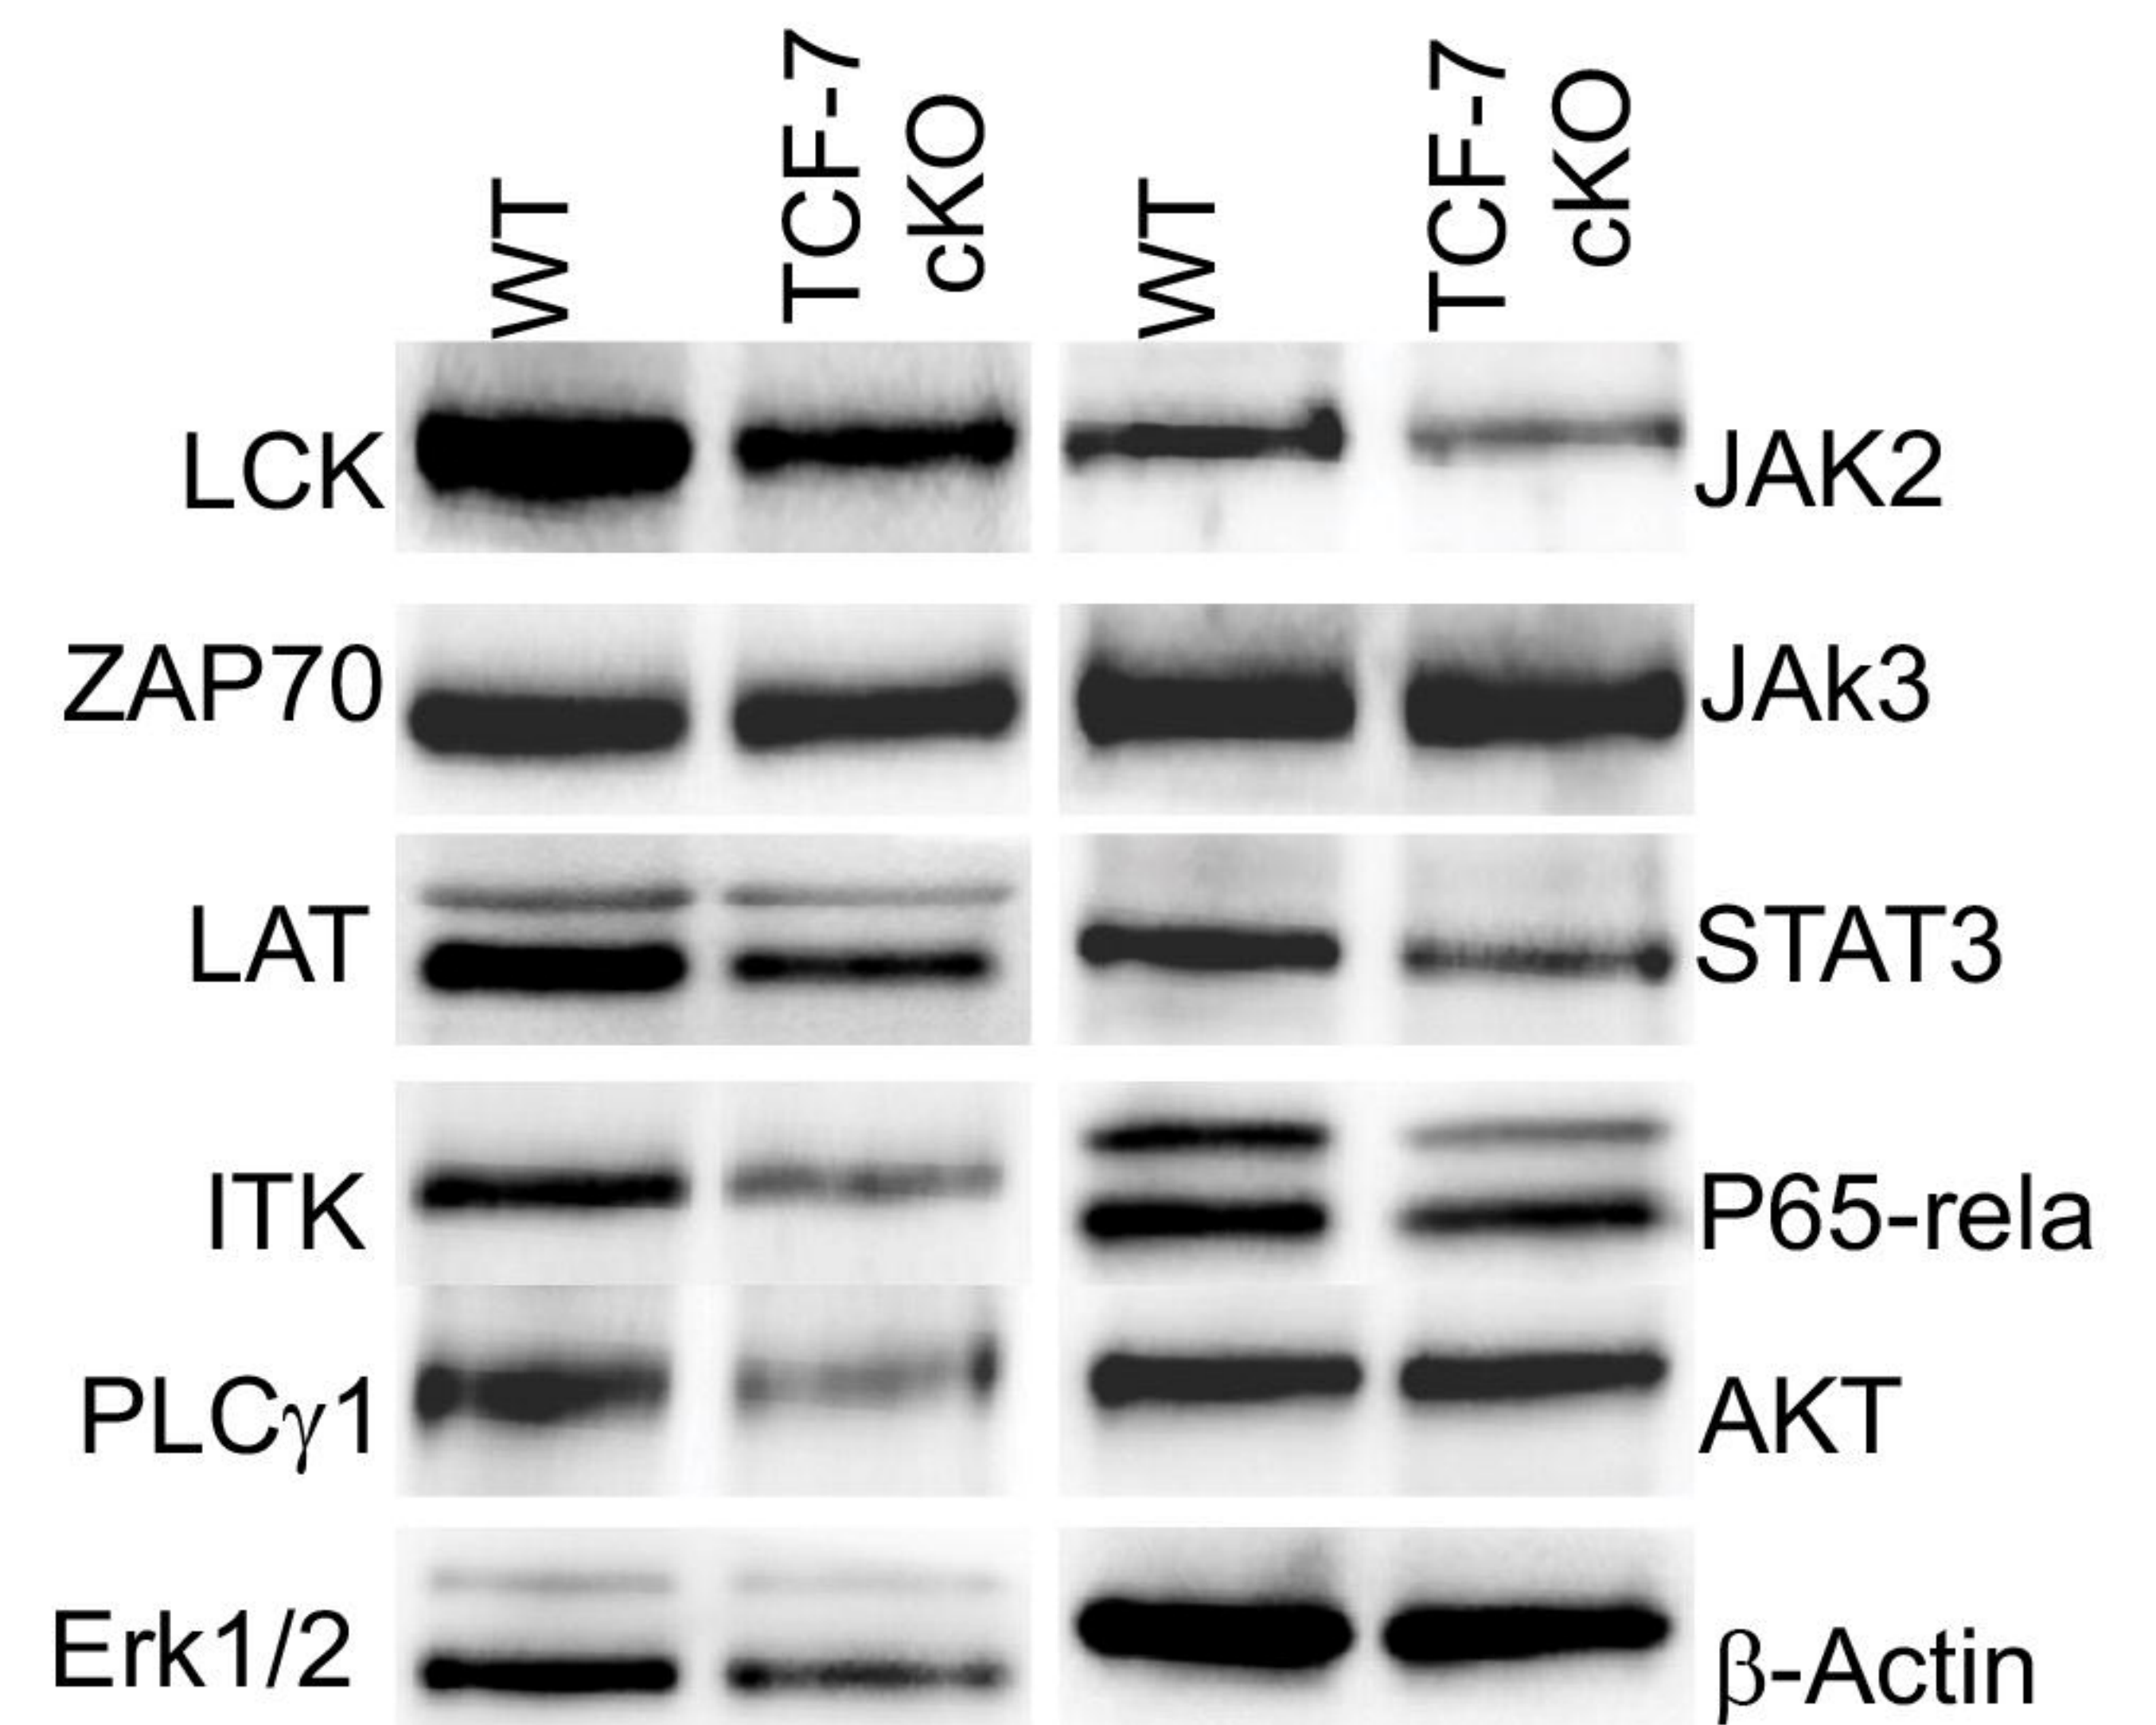

E Stim

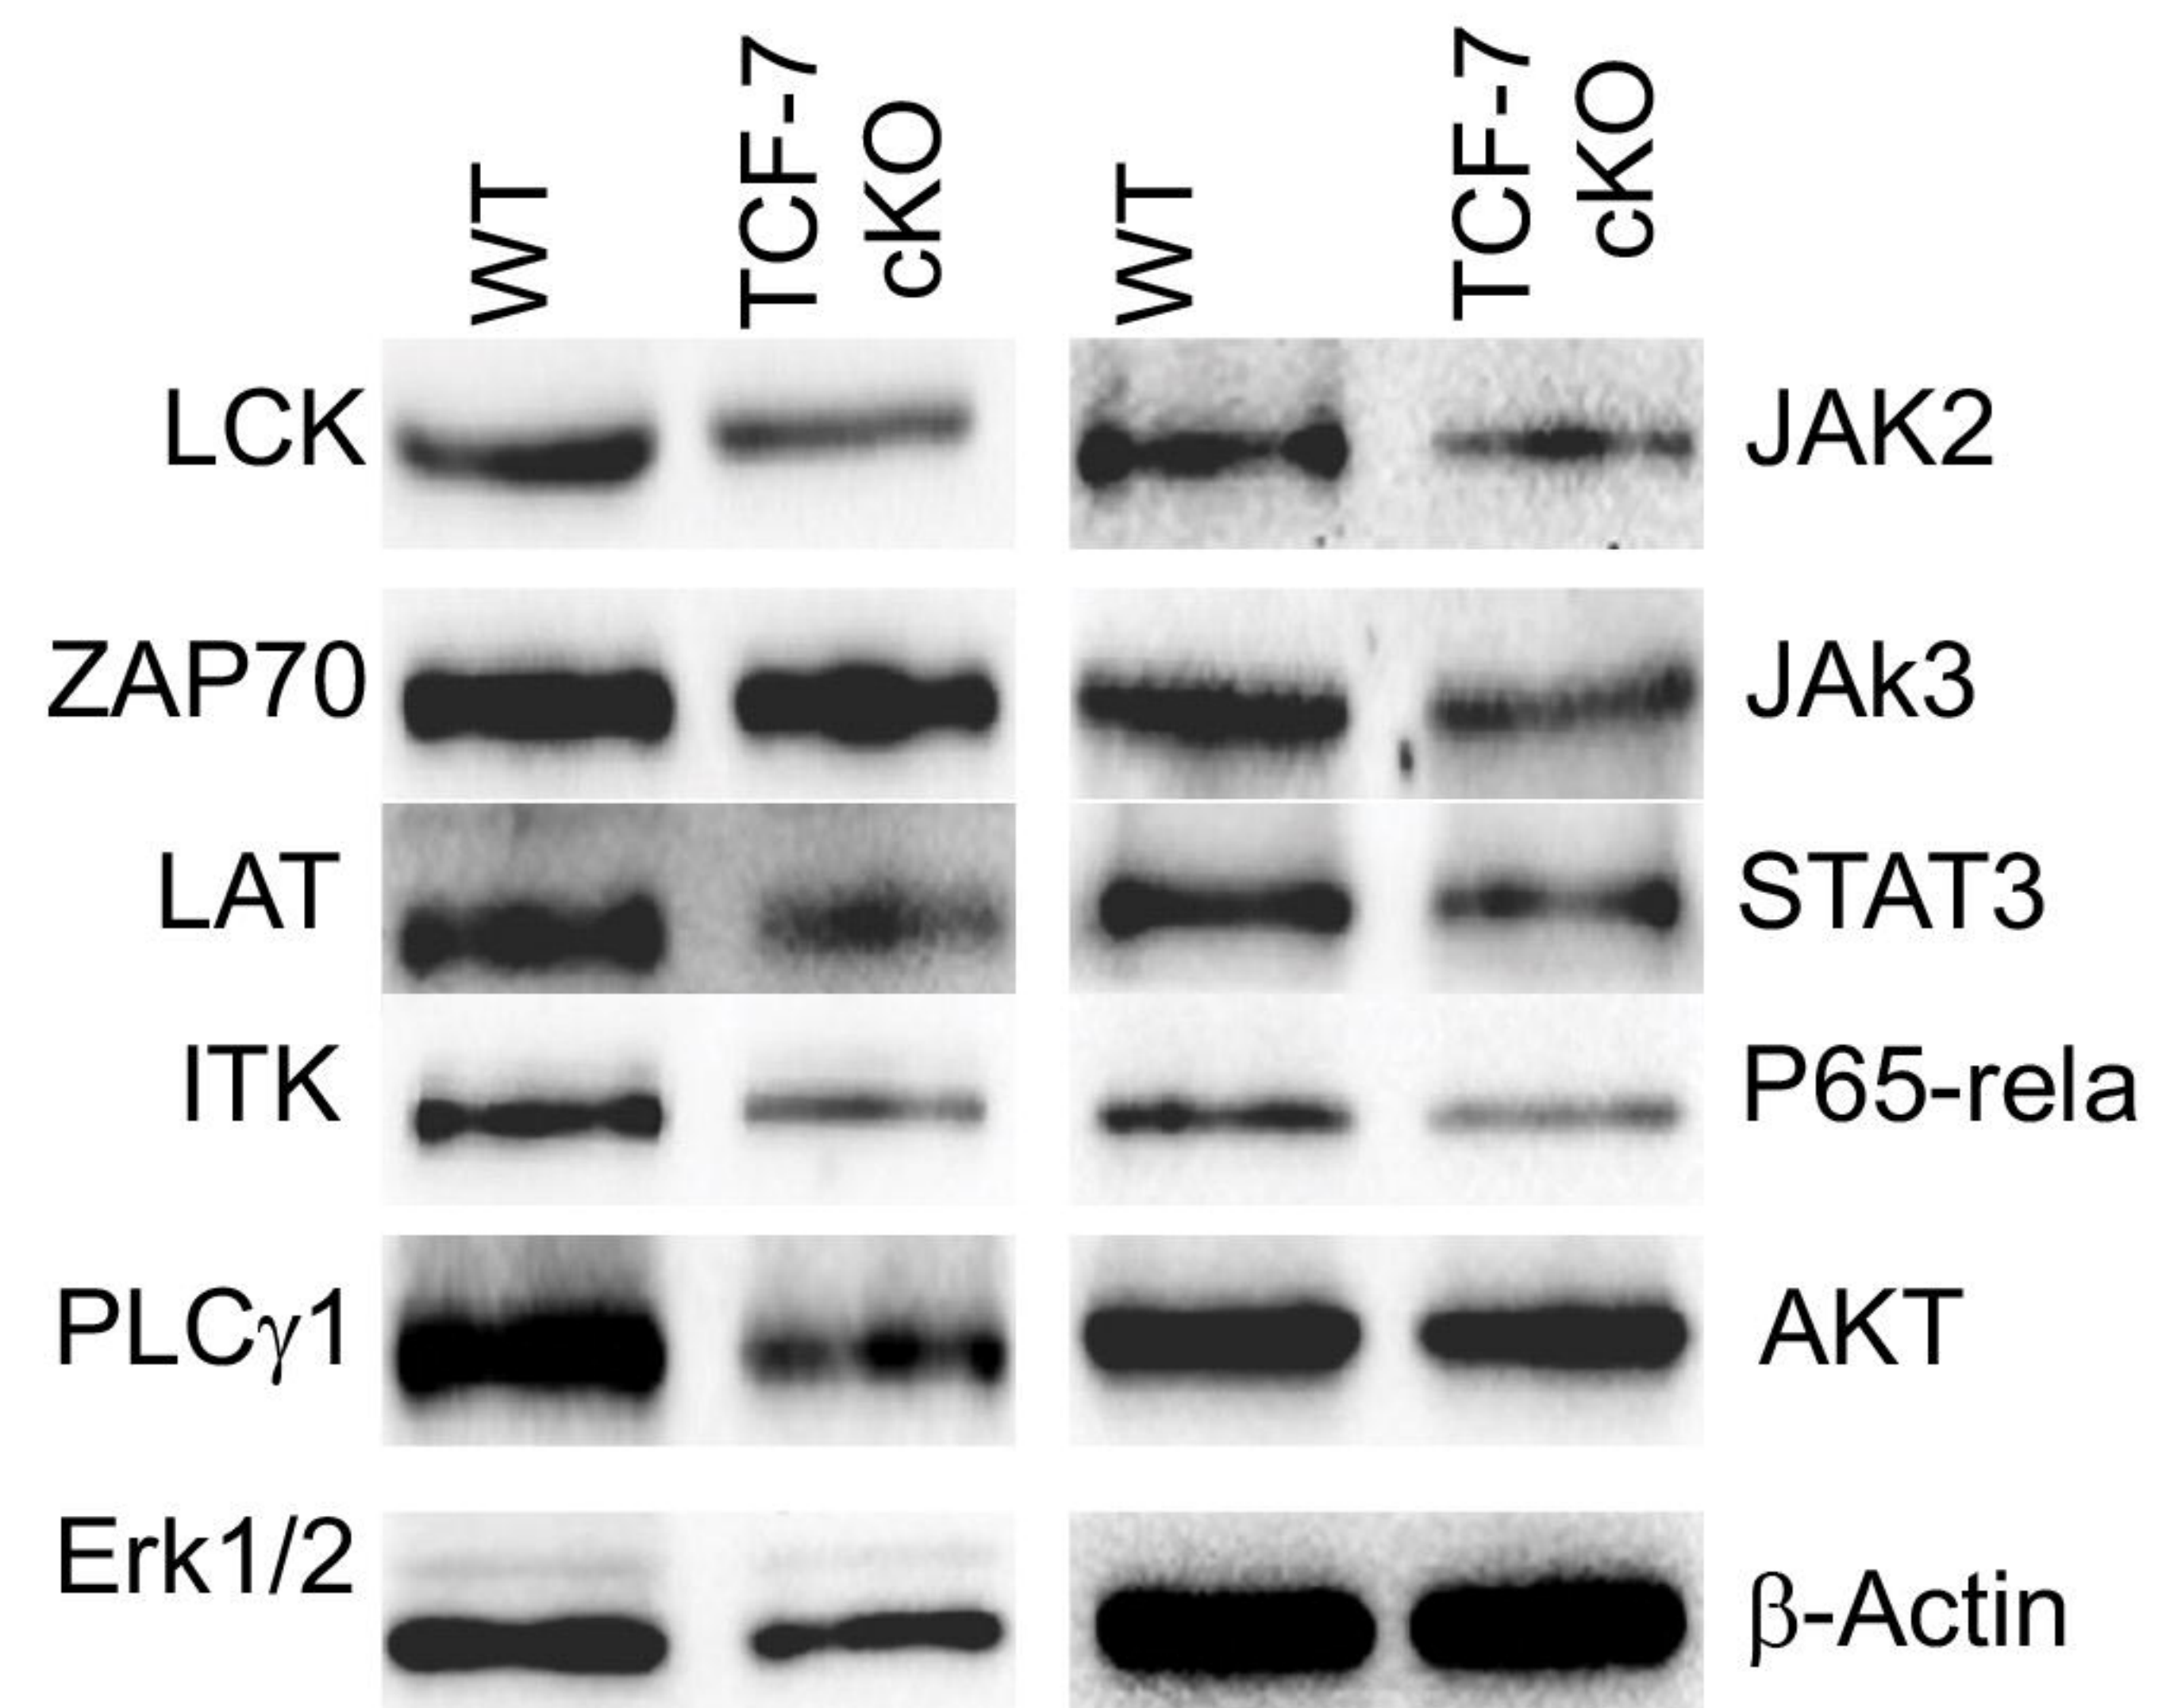

Source: https://www.biorxiv.org/content/10.1101/2021.03.22.436494v2.full.pdf
